# Supplementary material for: Strain-release C–C bond cleavage enables the [2,3]-sigmatropic rearrangement of tertiary allylamines
Source: Royal Society of Chemistry journal article supplement (doi:10.1039/d1cc03141d), 2021-01-01

## Strain-release C-C bond cleavage enables the [2,3]-sigmatropic rearrangement of tertiary allylamines

Rui-Han Dai, Lu Han, Qi Wang and Shi-Kai Tian \*

Hefei National Laboratory for Physical Sciences at the Microscale, Center for Excellence in Molecular Synthesis (CAS), and Department of Chemistry, University of Science and Technology of China, Hefei, Anhui 230026, China

### Supporting information

#### Table of contents

|                                                                                                                                 |      |
|---------------------------------------------------------------------------------------------------------------------------------|------|
| General information .....                                                                                                       | S-2  |
| Preparation of tertiary allylamines .....                                                                                       | S-2  |
| General procedure for the 1-sulfonylbicyclo[1.1.0]butane-mediated [2,3]-sigmatropic rearrangement of tertiary allylamines ..... | S-3  |
| A 2-mmol scale reaction .....                                                                                                   | S-3  |
| Analytical data for the products (Table 2 and Scheme 2) .....                                                                   | S-4  |
| Chemical transformations of the products (Scheme 3) .....                                                                       | S-19 |
| References .....                                                                                                                | S-21 |
| Crystal data of compound <i>cis</i> - <b>3o</b> .....                                                                           | S-22 |
| Crystal data of compound <i>trans</i> - <b>3o</b> .....                                                                         | S-27 |
| Copies of LC traces .....                                                                                                       | S-32 |
| Copies of NMR spectra .....                                                                                                     | S-33 |

## General information

$^1\text{H}$ ,  $^{13}\text{C}$  and  $^{19}\text{F}$  NMR spectra were recorded on 400, 100, and 376 MHz spectrometers, or on 500, 125, and 471 MHz spectrometers, respectively. The chemical shifts of  $^1\text{H}$  NMR and  $^{13}\text{C}$  NMR spectra were referenced internally with tetramethylsilane ( $\delta$  H 0.00,  $\delta$  C 0.0) or residual protio solvent signals  $\text{CDCl}_3$  ( $\delta$  C 77.2). The chemical shifts of  $^{19}\text{F}$  NMR spectra were referenced to external  $\text{CFCl}_3$ . NMR multiplicities were abbreviated as follows: s = singlet, d = doublet, t = triplet, q = quartet, m = multiplet, br = broad. Chemical shifts ( $\delta$ ) and coupling constants ( $J$ ) were expressed in ppm and Hz, respectively. High resolution mass spectra (HRMS) were recorded on an LC-TOF spectrometer using electron spray ionization (ESI) techniques. High pressure liquid chromatography (HPLC) analyses were performed on an instrument equipped with an isostatic pump using a chiral column (OD-H,  $250 \times 4.6$  mm) with isopropanol/hexane as mobile phase, and the UV detection was monitored at 254 nm. The chiral HPLC methods were calibrated with the corresponding racemic mixtures. Optical rotations were measured on a polarimeter with a sodium lamp at  $\lambda = 589$  nm and reported as  $[\alpha]_{\text{D}}^{T^\circ\text{C}}$  ( $c = \text{g}/100 \text{ mL}$ , solvent). Melting points are uncorrected. X-ray crystallography analysis of single crystals was performed on a Rigaku SuperNova single crystal X-ray diffractometer.

Allylamines **1a-y**<sup>1</sup> and 1-sulfonylbicyclo[1.1.0]butanes **2a-e**<sup>2</sup> were prepared according to literature procedures.

Abbreviations: Bn = benzyl, DCE = 1,2-dichloroethane, DMF = *N,N*-dimethylformamide, DMSO = dimethyl sulfoxide, EDCI = 1-(3-dimethylaminopropyl)-3-ethylcarbodiimide hydrochloride, Et = ethyl, HOBT = 1-hydroxybenzotriazole, Me = methyl, Ph = phenyl, Pr = propyl, THF = tetrahydrofuran.

## Preparation of tertiary allylamines

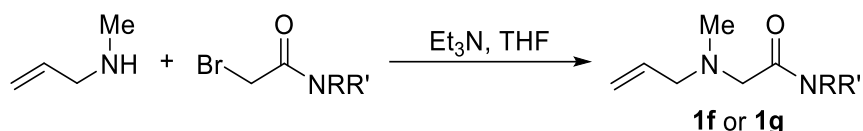

To a solution of *N*-allylmethylamine (356 mg, 5.0 mmol), triethylamine (556 mg, 0.76 mL, 5.5 mmol) in THF (10 mL) at room temperature was added the alkyl halide (5.0 mmol). The mixture was stirred for 14 h, filtered, and concentrated. The resulting residue was subjected to silica gel chromatography, using a mixture of ethyl acetate and petroleum ether (1:10~1:4) as the eluent, to give a tertiary allylamine product.

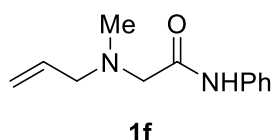

2-(Allyl(methyl)amino)-*N*-phenylacetamide (**1f**). Colorless oil (541 mg, 53% yield).  $^1\text{H}$  NMR (400 MHz,  $\text{CDCl}_3$ )  $\delta$  9.19 (br, s, 1H), 7.60-7.57 (m, 2H), 7.35-7.31 (m, 2H), 7.13-7.08 (m, 1H), 5.93-5.83 (m, 1H), 5.29-5.21 (m, 2H), 3.18-3.15 (m, 4H), 2.39 (s, 3H);  $^{13}\text{C}$  NMR (100 MHz,  $\text{CDCl}_3$ )  $\delta$  168.9, 137.8, 134.3, 129.1, 124.3, 119.6, 119.1, 60.9, 60.9, 43.3; HRMS (ESI)  $m/z$ : ( $\text{M} + \text{H}$ )<sup>+</sup> Calcd for  $\text{C}_{12}\text{H}_{17}\text{ON}_2$  205.1335; Found 205.1329.

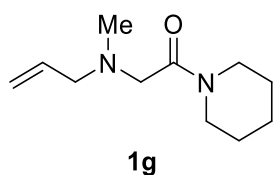

2-(Allyl(methyl)amino)-1-(piperidin-1-yl) ethan-1-one (**1g**). Yellow oil (638 mg, 65% yield).  $^1\text{H}$  NMR (500 MHz,  $\text{CDCl}_3$ )  $\delta$  5.90-5.82 (m, 1H), 5.22-5.13 (m, 2H), 3.54-3.48 (m, 4H), 3.17 (s, 2H), 3.06-3.05 (m, 2H), 2.28 (s, 3H), 1.66-1.61 (m, 2H), 1.58-1.51 (m, 4H);  $^{13}\text{C}$  NMR (125 MHz,  $\text{CDCl}_3$ )  $\delta$  168.5, 135.4, 118.0, 60.8, 60.1, 46.8, 43.0, 42.5, 26.6, 25.8, 24.7; HRMS (ESI)  $m/z$ : ( $M + H$ ) $^+$  Calcd for  $\text{C}_{11}\text{H}_{21}\text{ON}_2$  197.1648; Found 197.1644.

### General procedure for the 1-sulfonylbicyclo[1.1.0]butane-mediated [2,3]-sigmatropic rearrangement of tertiary allylamines

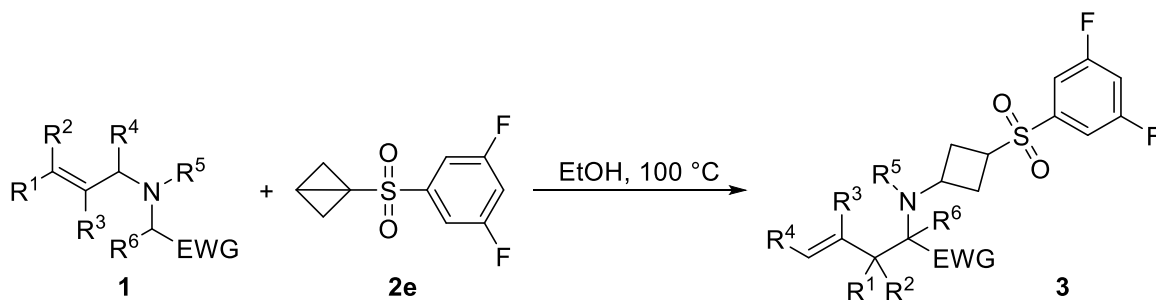

To a stirred solution of allylamine **1** (0.20 mmol) in ethanol (1.0 mL) was added bicyclo[1.1.0]butane **2e** (55.2 mg, 0.24 mmol). The mixture was stirred in a sealed tube at 100 °C (oil bath) for 20 h. The mixture was concentrated and purified by silica gel chromatography, using a mixture of ethyl acetate and petroleum ether (1:2 to 1:10) as the eluent, to give homoallylic amine **3**.

Except compounds **3e**, **3i**, **3j**, **3k**, **3o**, **3p**, **3t**, and **3aa-ac**, the products were obtained as a mixture of *cis*- and *trans*-isomers and their ratios were determined by  $^1\text{H}$  NMR spectroscopic analysis. The relative stereochemistry of compounds *cis*-**3o** and *trans*-**3o** was assigned by single crystal X-ray analysis (see below), and that of the rest of the products was assigned by analogy.

### A 2-mmol scale reaction

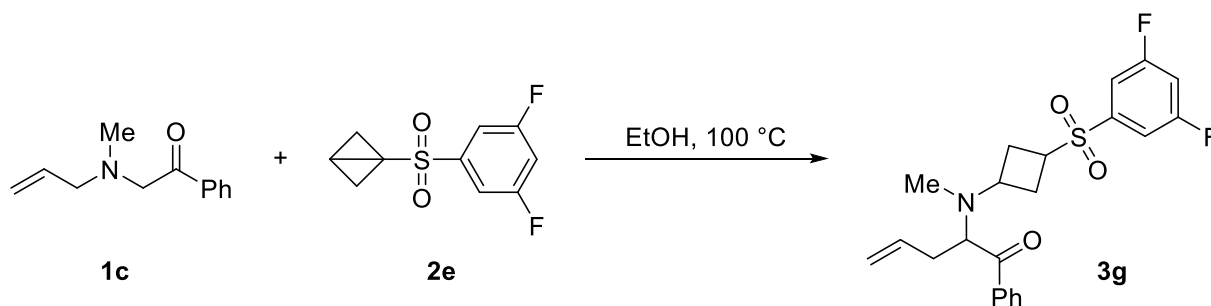

To a stirred solution of allylamine **1c** (379 mg, 2.0 mmol) in ethanol (10 mL) was added bicyclo[1.1.0]butane **2e** (552 mg, 2.4 mmol). The mixture was stirred in a sealed tube at 100 °C (oil bath) for 20 h. The mixture was concentrated and purified by silica gel chromatography, using a mixture of ethyl acetate and petroleum ether (1:5) as the eluent, to give homoallylic amine **3g** as a brown oil (747 mg, 89%).

### Analytical data for the products (Table 2 and Scheme 2)

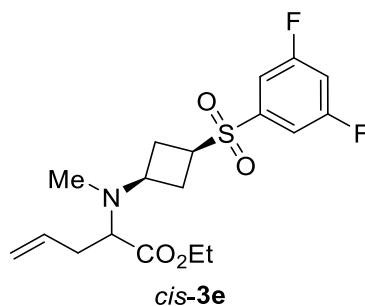

(*cis*)-Ethyl 2-((3-((3,5-difluorophenyl)sulfonyl)cyclobutyl)(methyl)amino)pent-4-enoate (*cis*-**3e**). Colorless oil (17.6 mg, 23% yield). <sup>1</sup>H NMR (400 MHz, CDCl<sub>3</sub>) δ 7.45-7.39 (m, 2H), 7.13-7.08 (m, 1H), 5.80-5.70 (m, 1H), 5.12-5.03 (m, 2H), 4.13 (q, *J* = 7.2 Hz, 2H), 3.46-3.38 (m, 1H), 3.28-3.18 (m, 2H), 2.53-2.41 (m, 3H), 2.39-2.26 (m, 3H), 2.24 (s, 3H), 1.25 (t, *J* = 7.2 Hz, 3H); <sup>13</sup>C NMR (100 MHz, CDCl<sub>3</sub>) δ 171.6, 163.0 (dd, *J* = 254.2, 11.2 Hz), 141.8 (t, *J* = 8.0 Hz), 134.5, 117.3, 111.9 (dd, *J* = 19.6, 8.3 Hz), 109.5 (t, *J* = 24.8 Hz), 62.7, 60.4, 51.9, 50.4, 34.0, 32.1, 29.4, 29.0, 14.5; <sup>19</sup>F NMR (376 MHz, CDCl<sub>3</sub>) δ -104.9; HRMS (ESI) *m/z*: (M + H)<sup>+</sup> Calcd for C<sub>18</sub>H<sub>24</sub>F<sub>2</sub>NO<sub>4</sub>S 388.1389; Found 388.1387.

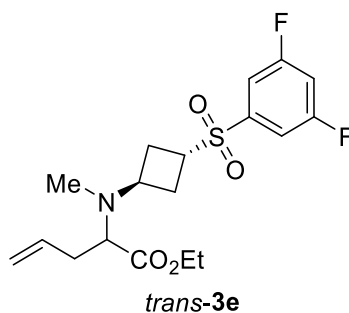

(*trans*)-Ethyl 2-((3-((3,5-difluorophenyl)sulfonyl)cyclobutyl)(methyl)amino)pent-4-enoate (*trans*-**3e**). Colorless oil (47.5 mg, 61% yield). <sup>1</sup>H NMR (400 MHz, CDCl<sub>3</sub>) δ 7.48-7.42 (m, 2H), 7.14-7.09 (m, 1H), 5.79-5.68 (m, 1H), 5.13-5.03 (m, 2H), 4.23-4.10 (m, 2H), 3.68-3.58 (m, 2H), 3.28 (t, *J* = 8.0 Hz, 1H), 2.65-2.54 (m, 2H), 2.53-2.47 (m, 1H), 2.37-2.30 (m, 3H), 2.21 (s, 3H), 1.30 (t, *J* = 7.2 Hz, 3H); <sup>13</sup>C NMR (100 MHz, CDCl<sub>3</sub>) δ 171.2, 163.0 (dd, *J* = 254.4, 11.3 Hz), 141.5 (t, *J* = 7.7 Hz), 134.4, 117.5, 112.1 (dd, *J* = 19.6, 8.3 Hz), 109.5 (t, *J* = 24.8 Hz), 62.1, 60.6, 54.8, 52.9, 33.6, 32.1, 28.7, 28.3, 14.6; <sup>19</sup>F NMR (376 MHz, CDCl<sub>3</sub>) δ -104.9; HRMS (ESI) *m/z*: (M + H)<sup>+</sup> Calcd for C<sub>18</sub>H<sub>24</sub>F<sub>2</sub>NO<sub>4</sub>S 388.1389; Found 388.1383.



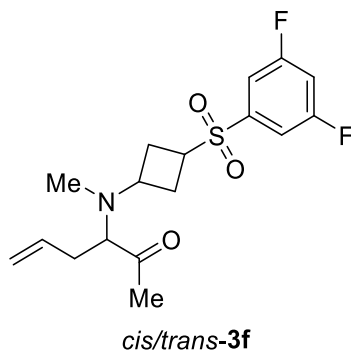

(*cis/trans*)-3-((3,5-Difluorophenyl)sulfonyl)cyclobutyl(methylamino)hex-5-en-2-one, (inseparable mixture of *cis*-**3f** and *trans*-**3f**, *cis/trans* = 27:73). Colorless oil (44.3 mg, 62% yield). <sup>1</sup>H NMR (500 MHz, CDCl<sub>3</sub>) δ 7.48-7.42 (m, 2H), 7.15-7.10 (m, 1H), 5.76-5.68 (m, 1H), 5.09-5.00 (m, 2H), 3.73-3.65 (m, 1.5H), 3.47-3.40 (m, 0.3H), 3.27-3.21 (m, 1.2 H), 2.65-2.58 (m, 1.7H), 2.51-2.27 (m, 4H), 2.20-2.13 (m, 6.3H); <sup>13</sup>C NMR (125 MHz, CDCl<sub>3</sub>) δ 208.5, 163.1 (dd, *J* = 254.4, 11.4 Hz), 163.0 (dd, *J* = 254.4, 11.4 Hz), 141.8 (t, *J* = 7.9 Hz), 141.4 (t, *J* = 6.7 Hz), 135.4, 135.3, 117.4, 117.2, 112.0 (dd, *J* = 20.8, 7.4 Hz), 111.8 (dd, *J* = 20.8, 7.3 Hz), 109.6 (t, *J* = 25.0 Hz), 109.5 (t, *J* = 25.0 Hz), 68.9, 68.2, 66.4, 54.6, 52.8, 51.6, 50.2, 32.8, 32.5, 31.2, 29.4, 29.3, 29.1, 28.9, 28.6, 28.5; <sup>19</sup>F NMR (471 MHz, CDCl<sub>3</sub>) δ -104.7, -104.8; HRMS (ESI) *m/z*: (M + H)<sup>+</sup> Calcd for C<sub>17</sub>H<sub>22</sub>F<sub>2</sub>NO<sub>3</sub>S 358.1283; Found 358.1279.

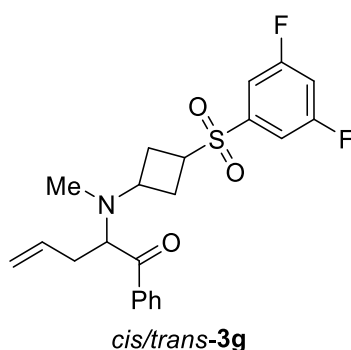

(*cis/trans*)-2-((3,5-Difluorophenyl)sulfonyl)cyclobutyl(methylamino)-1-phenylpent-4-en-1-one (inseparable mixture of *cis*-**3g** and *trans*-**3g**, *cis/trans* = 24:76). Brown oil (82.2 mg, 98% yield). <sup>1</sup>H NMR (400 MHz, CDCl<sub>3</sub>) δ 7.96-7.90 (m, 2H), 7.60-7.54 (m, 1H), 7.49-7.44 (m, 2H), 7.42-7.36 (m, 2H), 7.13-7.06 (m, 1H), 5.79-5.69 (m, 1H), 5.12-4.99 (m, 2H), 4.26-4.21 (m, 1H), 3.72-3.66 (m, 0.8H), 3.62-3.55 (m, 0.8H), 3.41-3.25 (m, 0.2H), 3.31-3.25 (m, 0.2H), 2.70-2.58 (m, 1.3H), 2.56-2.44 (m, 2H), 2.42-2.32 (m, 2.7H), 2.31 (s, 0.8H), 2.21 (s, 2.2H); <sup>13</sup>C NMR (100 MHz, CDCl<sub>3</sub>) δ 199.3, 199.0, 163.0 (dd, *J* = 254.4, 11.3 Hz), 141.8 (t, *J* = 7.9 Hz), 141.4 (t, *J* = 8.0 Hz), 137.4, 137.2, 135.1, 135.0, 133.3, 128.8, 128.8, 128.5, 128.4, 117.7, 117.5, 112.1 (dd, *J* = 19.7, 8.2 Hz), 111.8 (d, *J* = 7.9 Hz), 109.6 (t, *J* = 24.8 Hz), 109.5 (t, *J* = 24.7 Hz), 64.2, 63.4, 54.8, 53.0, 51.2, 50.5, 32.8, 32.1, 30.7, 30.3, 29.4, 29.0, 28.7, 28.4; <sup>19</sup>F NMR (376 MHz, CDCl<sub>3</sub>) δ -104.8, -104.8; HRMS (ESI) *m/z*: (M + H)<sup>+</sup> Calcd for C<sub>22</sub>H<sub>24</sub>F<sub>2</sub>NO<sub>3</sub>S 420.1440; Found 420.1437.

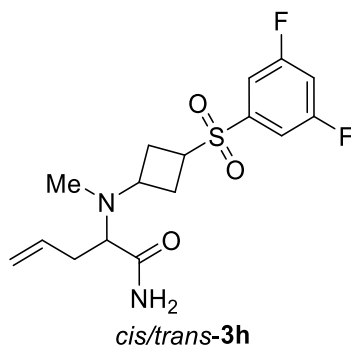

(*cis/trans*)-2-((3-((3,5-Difluorophenyl)sulfonyl)cyclobutyl)(methyl)amino)pent-4-enamide (inseparable mixture of *cis*-**3h** and *trans*-**3h**, *cis/trans* = 45:55). Yellow oil (50.9 mg, 71% yield). <sup>1</sup>H NMR (400 MHz, CDCl<sub>3</sub>) δ 7.46-7.41 (m, 2H), 7.16-7.10 (m, 1H), 6.98 + 6.89 (s, 1H), 6.14 + 6.03 (s, 1H), 5.92-5.80 (m, 1H), 5.15-5.00 (m, 2H), 3.78-3.66 (m, 1H), 3.52-3.43 (m, 0.6H), 3.36-3.30 (m, 0.4H), 3.28-3.21 (m, 1H), 2.72-2.57 (m, 2H), 2.47-2.28 (m, 4H), 2.25 + 2.24 (s, 3H); <sup>13</sup>C NMR (100 MHz, CDCl<sub>3</sub>) δ 175.1, 174.7, 163.0 (dd, *J* = 254.4, 11.3 Hz), 163.0 (dd, *J* = 254.4, 11.3 Hz), 141.6 (t, *J* = 7.8 Hz), 141.2 (t, *J* = 7.8 Hz), 136.5, 136.0, 117.2, 117.0, 112.0 (dd, *J* = 19.6, 8.4 Hz), 111.8 (dd, *J* = 19.7, 8.3 Hz), 109.6 (t, *J* = 24.8 Hz), 109.6 (t, *J* = 24.8 Hz), 63.4, 63.2, 54.5, 52.6, 51.7, 50.1, 33.0, 32.9, 30.4, 29.2, 28.9, 28.7, 28.2; <sup>19</sup>F NMR (376 MHz, CDCl<sub>3</sub>) δ -104.5, -104.6; HRMS (ESI) *m/z*: (M + H)<sup>+</sup> Calcd for C<sub>16</sub>H<sub>21</sub>F<sub>2</sub>N<sub>2</sub>O<sub>3</sub>S 359.1236; Found 359.1240.

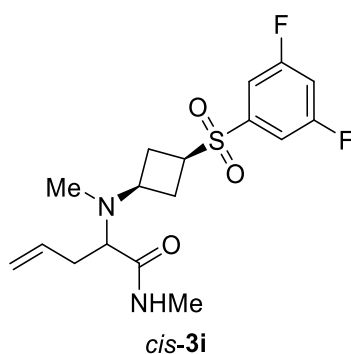

(*cis*)-2-((3-((3,5-Difluorophenyl)sulfonyl)cyclobutyl)(methyl)amino)-*N*-methylpent-4-enamide (*cis*-**3i**). Colorless oil (32.7 mg, 44% yield). <sup>1</sup>H NMR (400 MHz, CDCl<sub>3</sub>) δ 7.44-7.38 (m, 2H), 7.16-7.09 (m, 2H), 5.92-5.81 (m, 1H), 5.12-5.00 (m, 2H), 3.51-3.42 (m, 1H), 3.38-3.32 (m, 1H), 3.23 (s, 1H), 2.84 (d, *J* = 5.2 Hz, 3H), 2.78-2.70 (m, 1H), 2.48-2.27 (m, 5H), 2.23 (s, 3H); <sup>13</sup>C NMR (100 MHz, CDCl<sub>3</sub>) δ 172.4, 163.0 (dd, *J* = 254.6, 11.4 Hz), 141.6 (t, *J* = 7.8 Hz), 136.7, 117.0, 111.8 (dd, *J* = 19.6, 8.3 Hz), 109.7 (t, *J* = 24.8 Hz), 63.4, 51.8, 50.1, 33.0, 30.7, 29.3, 29.0, 26.2; <sup>19</sup>F NMR (376 MHz, CDCl<sub>3</sub>) δ -104.6; HRMS (ESI) *m/z*: (M + H)<sup>+</sup> Calcd for C<sub>17</sub>H<sub>23</sub>F<sub>2</sub>N<sub>2</sub>O<sub>3</sub>S 373.1392; Found 373.1385.

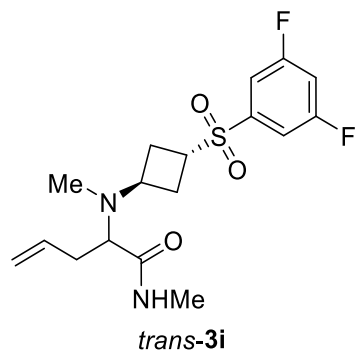

(*trans*)-2-((3-((3,5-Difluorophenyl)sulfonyl)cyclobutyl)(methyl)amino)-*N*-methylpent-4-enamide (***trans*-3i**). Colorless oil (15 mg, 20%).  $^1\text{H}$  NMR (500 MHz,  $\text{CDCl}_3$ )  $\delta$  7.47-7.42 (m, 2H), 7.14-7.10 (m, 1H), 6.93 (br, 1H), 5.92-5.84 (m, 1H), 5.13-5.04 (m, 2H), 3.74-3.68 (m, 1H), 3.68-3.62 (m, 1H), 3.16 (t,  $J = 6.5$  Hz, 1H), 2.81 (d,  $J = 5.0$  Hz, 3H), 2.74-2.68 (m, 1H), 2.64-2.56 (m, 2H), 2.33-2.23 (m, 3H), 2.18 (s, 3H);  $^{13}\text{C}$  NMR (125 MHz,  $\text{CDCl}_3$ )  $\delta$  172.6, 163.1 (dd,  $J = 254.5, 11.1$  Hz), 141.4 (t,  $J = 7.9$  Hz), 136.7, 117.0, 112.1 (dd,  $J = 20.9, 7.4$  Hz), 109.7 (t,  $J = 24.8$  Hz), 63.5, 54.5, 52.7, 33.0, 30.6, 28.9, 28.3, 26.1;  $^{19}\text{F}$  NMR (471 MHz,  $\text{CDCl}_3$ )  $\delta$  -104.7; HRMS (ESI)  $m/z$ : ( $M + H$ ) $^+$  Calcd for  $\text{C}_{17}\text{H}_{23}\text{F}_2\text{N}_2\text{O}_3\text{S}$  373.1392; Found 373.1416.

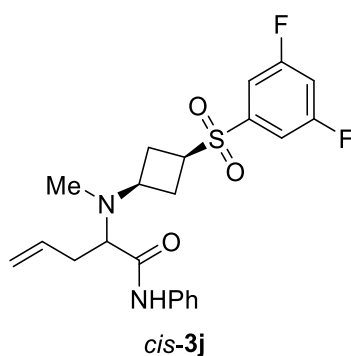

(*cis*)-2-((3-((3,5-Difluorophenyl)sulfonyl)cyclobutyl)(methyl)amino)-*N*-phenylpent-4-enamide (***cis*-3j**). Yellow oil (22.8 mg, 26% yield).  $^1\text{H}$  NMR (400 MHz,  $\text{CDCl}_3$ )  $\delta$  9.19 (br, s, 1H), 7.63-7.59 (m, 2H), 7.43-7.38 (m, 2H), 7.37-7.32 (m, 2H), 7.14-7.07 (m, 2H), 5.97-5.87 (m, 1H), 5.16-5.03 (m, 2H), 3.55-3.47 (m, 1H), 3.41-3.37 (m, 2H), 2.86-2.79 (m, 1H), 2.56-2.48 (m, 2H), 2.46-2.35 (m, 3H), 2.32 (s, 3H);  $^{13}\text{C}$  NMR (100 MHz,  $\text{CDCl}_3$ )  $\delta$  170.3, 163.1 (dd,  $J = 254.8, 11.4$  Hz), 141.6 (t,  $J = 7.8$  Hz), 137.8, 136.6, 129.1, 124.3, 119.7, 117.2, 111.9 (dd,  $J = 19.7, 8.4$  Hz), 109.7 (t,  $J = 24.9$  Hz), 64.1, 51.8, 50.2, 33.2, 30.3, 29.0, 28.7;  $^{19}\text{F}$  NMR (376 MHz,  $\text{CDCl}_3$ )  $\delta$  -104.5; HRMS (ESI)  $m/z$ : ( $M + H$ ) $^+$  Calcd for  $\text{C}_{22}\text{H}_{25}\text{F}_2\text{N}_2\text{O}_3\text{S}$  435.1549; Found 435.1548.

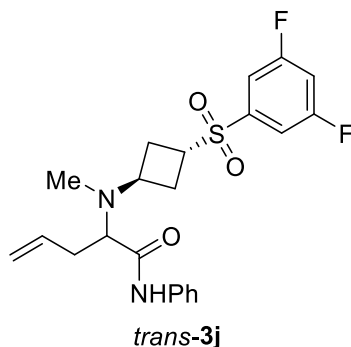

(*trans*)-2-((3-((3,5-Difluorophenyl)sulfonyl)cyclobutyl)(methyl)amino)-*N*-phenylpent-4-enamide (**trans-3j**). Yellow oil (42.4 mg, 49% yield).  $^1\text{H}$  NMR (400 MHz,  $\text{CDCl}_3$ )  $\delta$  9.01 (br, 1H), 7.53-7.50 (m, 2H), 7.47-7.43 (m, 2H), 7.34-7.30 (m, 2H), 7.14-7.08 (m, 2H), 6.00-5.88 (m, 1H), 5.18-5.08 (m, 2H), 3.83-3.75 (m, 1H), 3.72-3.65 (m, 1H), 3.32 (t,  $J=6.8$  Hz 1H), 2.82-2.75 (m, 1H), 2.69-2.60 (m, 2H), 2.40-2.31 (m, 3H), 2.26 (s, 3H);  $^{13}\text{C}$  NMR (100 MHz,  $\text{CDCl}_3$ )  $\delta$  170.3, 163.1 (dd,  $J = 254.5, 11.2$  Hz), 141.2 (t,  $J = 7.8$  Hz), 137.6, 136.4, 129.1, 124.3, 119.6, 117.3, 112.0 (dd,  $J = 19.6, 8.3$  Hz), 109.7 (t,  $J = 24.8$  Hz), 64.2, 54.5, 52.6, 33.3, 30.0, 29.0, 28.4;  $^{19}\text{F}$  NMR (376 MHz,  $\text{CDCl}_3$ )  $\delta$  -104.6; HRMS (ESI)  $m/z$ : ( $\text{M} + \text{H}$ ) $^+$  Calcd for  $\text{C}_{22}\text{H}_{25}\text{F}_2\text{N}_2\text{O}_3\text{S}$  435.1549; Found 435.1544.

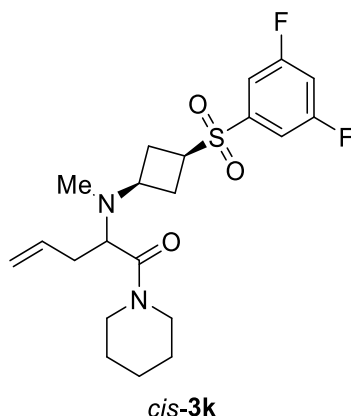

(*cis*)-2-((3-((3,5-Difluorophenyl)sulfonyl)cyclobutyl)(methyl)amino)-1-(piperidin-1-yl)pent-4-en-1-one (**cis-3k**). Colorless oil (16.9 mg, 20% yield).  $^1\text{H}$  NMR (400 MHz,  $\text{CDCl}_3$ )  $\delta$  7.43-7.38 (m, 2H), 7.13-7.07 (m, 1H), 5.79-5.69 (m, 1H), 5.08-4.99 (m, 2H), 3.80-3.74 (m, 1H), 3.61-3.55 (m, 1H), 3.53-3.50 (m, 1H), 3.45-3.38 (m, 1H), 3.35-3.27 (m, 3H), 2.61-2.42 (m, 3H), 2.30 (s, 3H), 2.27-2.17 (m, 3H), 1.70-1.44 (m, 6H);  $^{13}\text{C}$  NMR (100 MHz,  $\text{CDCl}_3$ )  $\delta$  169.2, 163.0 (dd,  $J = 254.3, 11.3$  Hz), 141.9 (t,  $J = 8.0$  Hz), 136.0, 117.0, 111.8 (dd,  $J = 19.7, 8.3$  Hz), 109.5 (t,  $J = 24.8$  Hz), 61.6, 50.6, 50.4, 47.0, 43.3, 33.4, 30.3, 29.5, 28.6, 26.7, 26.0, 24.7;  $^{19}\text{F}$  NMR (376 MHz,  $\text{CDCl}_3$ )  $\delta$  -104.8; HRMS (ESI)  $m/z$ : ( $\text{M} + \text{H}$ ) $^+$  Calcd for  $\text{C}_{21}\text{H}_{29}\text{F}_2\text{N}_2\text{O}_3\text{S}$  427.1862; Found 427.1861.

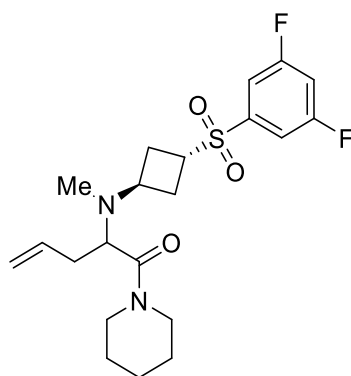

*trans*-**3k**

(*trans*)-2-((3-((3,5-Difluorophenyl)sulfonyl)cyclobutyl)(methyl)amino)-1-(piperidin-1-yl)pent-4-en-1-one (*trans*-**3k**). Colorless oil (34.3 mg, 40% yield).  $^1\text{H}$  NMR (400 MHz,  $\text{CDCl}_3$ )  $\delta$  7.48-7.42 (m, 2H), 7.14-7.09 (m, 1H), 5.78-5.68 (m, 1H), 5.11-5.00 (m, 2H), 3.72-3.60 (m, 3H), 3.58-3.50 (m, 2H), 3.45-3.32 (m, 2H), 2.64-2.53 (m, 3H), 2.42-2.34 (m, 2H), 2.24-2.18 (m, 4H), 1.69-1.48 (m, 6H);  $^{13}\text{C}$  NMR (100 MHz,  $\text{CDCl}_3$ )  $\delta$  169.2, 163.0 (dd,  $J = 254.4, 11.3$  Hz), 141.5 (t,  $J = 7.8$  Hz), 135.7, 117.1, 112.0 (dd,  $J = 19.6, 8.2$  Hz), 109.5 (t,  $J = 24.8$  Hz), 60.5, 54.2, 53.1, 47.0, 43.2, 32.3, 30.9, 28.8, 28.1, 26.8, 25.9, 24.7;  $^{19}\text{F}$  NMR (376 MHz,  $\text{CDCl}_3$ )  $\delta$  -104.8; HRMS (ESI)  $m/z$ : ( $\text{M} + \text{H}$ ) $^+$  Calcd for  $\text{C}_{21}\text{H}_{29}\text{F}_2\text{N}_2\text{O}_3\text{S}$  427.1862; Found 427.1855.

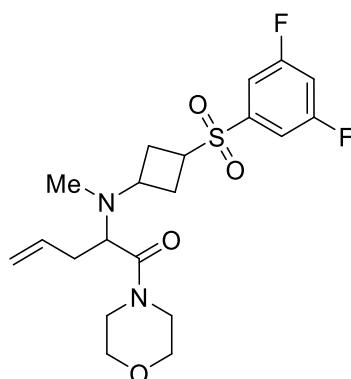

*cis/trans*-**3l**

(*cis/trans*)-2-((3-((3,5-Difluorophenyl)sulfonyl)cyclobutyl)(methyl)amino)-1-morpholinopent-4-en-1-one (inseparable mixture of *cis*-**3l** and *trans*-**3l**, *cis/trans* = 35:65). Colorless oil (55.7 mg, 65% yield).  $^1\text{H}$  NMR (400 MHz,  $\text{CDCl}_3$ )  $\delta$  7.46-7.39 (m, 2H), 7.15-7.09 (m, 1H), 5.78-5.67 (m, 1H), 5.12-5.00 (m, 2H), 3.83-3.80 (m, 0.4H), 3.74-3.59 (m, 7H), 3.54-3.40 (m, 3.3H), 3.33-3.25 (m, 0.3H), 2.67-2.52 (m, 2.7H), 2.50-2.33 (m, 2H), 2.29 (s, 1H), 2.25-2.16 (m, 3.3H);  $^{13}\text{C}$  NMR (100 MHz,  $\text{CDCl}_3$ )  $\delta$  169.6, 169.5, 163.1 (dd,  $J = 254.4, 11.3$  Hz), 163.0 (dd,  $J = 254.4, 11.3$  Hz), 141.7 (t,  $J = 7.9$  Hz), 141.4 (t,  $J = 7.9$  Hz), 135.7, 135.4, 117.5, 117.3, 112.0 (dd,  $J = 19.6, 8.3$  Hz), 111.8 (dd,  $J = 19.6, 8.3$  Hz), 109.6 (t,  $J = 24.7$  Hz), 109.5 (t,  $J = 24.8$  Hz), 67.1, 67.1, 67.0, 67.0, 61.7, 60.9, 54.2, 53.0, 50.4, 50.3, 46.4, 42.5, 42.4, 33.4, 32.4, 30.3, 29.6, 29.5, 28.8, 28.3, 28.1;  $^{19}\text{F}$  NMR (376 MHz,  $\text{CDCl}_3$ )  $\delta$  -104.7; HRMS (ESI)  $m/z$ : ( $\text{M} + \text{H}$ ) $^+$  Calcd for  $\text{C}_{20}\text{H}_{27}\text{F}_2\text{N}_2\text{O}_4\text{S}$  429.1654; Found 429.1661.

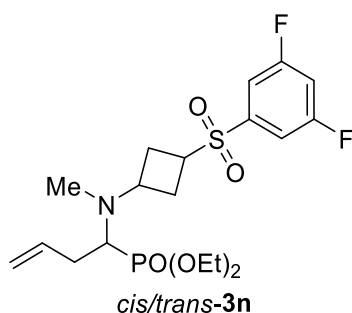

(*cis/trans*)-Diethyl (1-((3-((3,5-difluorophenyl)sulfonyl)cyclobutyl)(methyl)amino)but-3-en-1-yl)phosphonate (inseparable mixture of *cis*-**3n** and *trans*-**3n**, *cis/trans* = 41:59). Colorless oil (61.4 mg, 68% yield). <sup>1</sup>H NMR (400 MHz, CDCl<sub>3</sub>) δ 7.45-7.39 (m, 2H), 7.14-7.08 (m, 1H), 5.86-5.75 (m, 1H), 5.14-5.04 (m, 2H), 4.18-4.07 (m, 4H), 3.90-3.82 (m, 0.6H), 3.65-3.58 (m, 0.6H), 3.54-3.47 (m, 0.4H), 3.44-3.35 (m, 0.4H), 2.97-2.87 (m, 1H), 2.61-2.52 (m, 1H), 2.50-2.23 (m, 8H), 1.36-1.32 (m, 6H); <sup>13</sup>C NMR (100 MHz, CDCl<sub>3</sub>) δ 163.0 (dd, *J* = 254.3, 11.4 Hz), 163.0 (dd, *J* = 254.2, 11.3 Hz), 141.8 (t, *J* = 7.9 Hz), 141.6 (t, *J* = 7.9 Hz), 135.9 (d, *J* = 5.8 Hz), 135.8 (d, *J* = 5.9 Hz), 117.0, 117.0, 112.0 (dd, *J* = 19.6, 8.3 Hz), 111.8 (dd, *J* = 19.6, 8.3 Hz), 109.5 (t, *J* = 24.9 Hz), 109.4 (t, *J* = 25.0 Hz), 62.6 (d, *J* = 7.3 Hz), 62.3 (d, *J* = 7.4 Hz), 61.6 (d, *J* = 7.4 Hz), 61.4 (d, *J* = 7.6 Hz), 57.5 (d, *J* = 144.4 Hz), 57.2 (d, *J* = 144.9 Hz), 55.0 (d, *J* = 6.4 Hz), 52.8, 52.1 (d, *J* = 6.4 Hz), 50.1, 32.8 (d, *J* = 2.8 Hz), 32.6 (d, *J* = 2.1 Hz), 31.3 (d, *J* = 6.7 Hz), 31.0 (d, *J* = 6.5 Hz), 29.5 (d, *J* = 2.3 Hz), 29.2, 28.7 (d, *J* = 2.3 Hz), 28.4, 16.7 (d, *J* = 5.6 Hz), 16.7 (d, *J* = 5.7 Hz), 16.6 (d, *J* = 5.8 Hz), 16.5; <sup>19</sup>F NMR (376 MHz, CDCl<sub>3</sub>) δ -104.9, -104.9; HRMS (ESI) *m/z*: (M + H)<sup>+</sup> Calcd for C<sub>19</sub>H<sub>29</sub>F<sub>2</sub>NO<sub>5</sub>PS 452.1467; Found 452.1465.

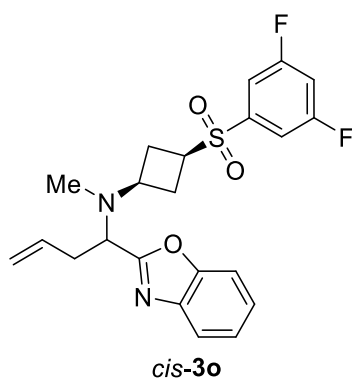

(*cis*)-*N*-(1-(Benzo[*d*]oxazol-2-yl)but-3-en-1-yl)-3-((3,5-difluorophenyl)sulfonyl)-*N*-methylcyclobutan-1-amine (*cis*-**3o**). White solid (22.2 mg, 26% yield), melting point: 103-105 °C. <sup>1</sup>H NMR (500 MHz, CDCl<sub>3</sub>) δ 7.72-7.69 (m, 1H), 7.53-7.50 (m, 1H), 7.43-7.39 (m, 2H), 7.36-7.31 (m, 2H), 7.12-7.08 (m, 1H), 5.84-5.76 (m, 1H), 5.15-5.02 (m, 2H), 4.01 (t, *J* = 7.5 Hz, 1H), 3.46-3.39 (m, 1H), 3.17-3.11 (m, 1H), 2.88-2.81 (m, 1H), 2.74-2.68 (m, 1H), 2.50-2.39 (m, 3H), 2.25-2.20 (m, 4H); <sup>13</sup>C NMR (125 MHz, CDCl<sub>3</sub>) δ 164.4, 163.0 (dd, *J* = 254.5, 11.4 Hz), 150.5, 141.6 (t, *J* = 8.1 Hz), 140.7, 134.1, 125.2, 124.5, 120.2, 117.8, 111.9 (dd, *J* = 20.6, 7.3 Hz), 110.8, 109.5 (t, *J* = 24.8 Hz), 58.2, 51.9, 50.3, 34.7, 32.2, 29.1, 29.0; <sup>19</sup>F NMR (471 MHz, CDCl<sub>3</sub>) δ -104.8; HRMS (ESI) *m/z*: (M + H)<sup>+</sup> Calcd for C<sub>22</sub>H<sub>23</sub>F<sub>2</sub>N<sub>2</sub>O<sub>3</sub>S 433.1392; Found 433.1391.

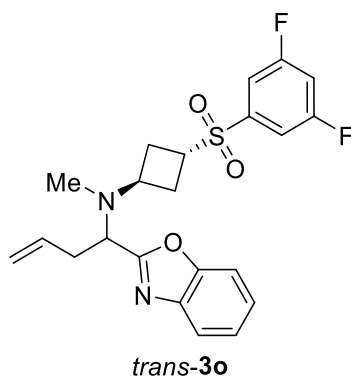

(*trans*)-*N*-(1-(Benzo[*d*]oxazol-2-yl)but-3-en-1-yl)-3-((3,5-difluorophenyl)sulfonyl)-*N*-methylcyclobutan-1-amine (*trans*-**3o**). White solid (60.0 mg, 69% yield), melting point: 103-105 °C. <sup>1</sup>H NMR (500 MHz, CDCl<sub>3</sub>) δ 7.75-7.73 (m, 1H), 7.56-7.53 (m, 1H), 7.46-7.43 (m, 2H), 7.38-7.33 (m, 2H), 7.12-7.07 (m, 1H), 5.83-5.75 (m, 1H), 5.15-5.02 (m, 2H), 4.03 (t, *J* = 8.0 Hz, 1H), 3.71-3.66 (m, 1H), 3.58-3.52 (m, 1H), 2.88-2.82 (m, 1H), 2.74-2.68 (m, 2H), 2.59-2.53 (m, 1H), 2.39-2.33 (m, 2H), 2.21 (s, 3H); <sup>13</sup>C NMR (125 MHz, CDCl<sub>3</sub>) δ 164.3, 163.0 (dd, *J* = 254.4, 11.4 Hz), 150.6, 141.3 (t, *J* = 9.0 Hz), 140.7, 134.2, 125.3, 124.5, 120.3, 117.9, 112.1 (dd, *J* = 20.9, 7.4 Hz), 110.8, 109.6 (t, *J* = 25.4 Hz), 57.7, 54.5, 52.9, 34.3, 32.2, 28.4, 28.2; <sup>19</sup>F NMR (471 MHz, CDCl<sub>3</sub>) δ -104.7; HRMS (ESI) *m/z*: (M + H)<sup>+</sup> Calcd for C<sub>22</sub>H<sub>23</sub>F<sub>2</sub>N<sub>2</sub>O<sub>3</sub>S 433.1392; Found 433.1393.

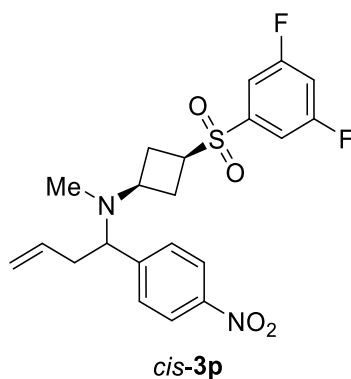

(*cis*)-3-((3,5-Difluorophenyl)sulfonyl)-*N*-methyl-*N*-(1-(4-nitrophenyl)but-3-en-1-yl)cyclobutan-1-amine (*cis*-**3p**). White solid (16.3 mg, 19% yield), melting point: 114-115 °C. <sup>1</sup>H NMR (400 MHz, CDCl<sub>3</sub>) δ 8.19-8.16 (m, 2H), 7.43-7.40 (m, 2H), 7.37-7.35 (m, 2H), 7.14-7.08 (m, 1H), 5.67-5.57 (m, 1H), 5.05-4.97 (m, 2H), 3.74-3.70 (m, 1H), 3.45-3.36 (m, 1H), 2.99-2.89 (m, 1H), 2.70-2.63 (m, 1H), 2.59-2.39 (m, 3H), 2.35-2.28 (m, 1H), 2.19-2.12 (m, 4H); <sup>13</sup>C NMR (100 MHz, CDCl<sub>3</sub>) δ 163.0 (dd, *J* = 254.4, 11.3 Hz), 147.3, 141.7 (t, *J* = 7.2 Hz), 134.7, 129.4, 124.0, 123.5, 117.7, 111.9 (dd, *J* = 19.6, 8.3 Hz), 109.6 (t, *J* = 24.9 Hz), 64.1, 51.6, 50.5, 35.7, 31.9, 29.1, 29.0; <sup>19</sup>F NMR (376 MHz, CDCl<sub>3</sub>) δ -104.7; HRMS (ESI) *m/z*: (M + H)<sup>+</sup> Calcd for C<sub>21</sub>H<sub>23</sub>F<sub>2</sub>N<sub>2</sub>O<sub>4</sub>S 437.1341; Found 437.1340.

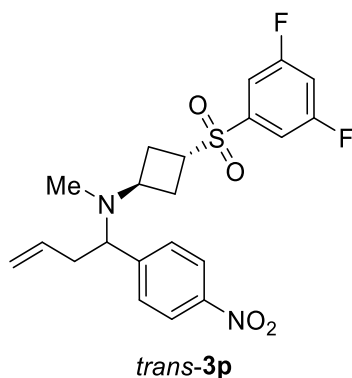

(*trans*)-3-((3,5-Difluorophenyl)sulfonyl)-*N*-methyl-*N*-(1-(4-nitrophenyl)but-3-en-1-yl)cyclobutan-1-amine (***trans*-3p**). White solid (26.5 mg, 30% yield), melting point 114-115 °C. <sup>1</sup>H NMR (400 MHz, CDCl<sub>3</sub>) δ 8.22-8.17 (m, 2H), 7.47-7.41 (m, 2H), 7.37-7.33 (m, 2H), 7.15-7.09 (m, 1H), 5.69-5.58 (m, 1H), 5.06-4.97 (m, 2H), 3.72 (dd, *J* = 8.8, 6.8 Hz, 1H), 3.69-3.62 (m, 1H), 3.43-3.35 (m, 1H), 2.68-2.52 (m, 3H), 2.49-2.37 (m, 2H), 2.32-2.25 (m, 1H), 2.02 (s, 3H); <sup>13</sup>C NMR (100 MHz, CDCl<sub>3</sub>) δ 163.0 (dd, *J* = 254.3, 11.3 Hz), 147.3, 146.2, 141.4 (t, *J* = 7.8 Hz), 134.9, 129.4, 123.4, 117.5, 112.0 (dd, *J* = 19.7, 8.3 Hz), 109.6 (t, *J* = 24.8 Hz), 63.5, 54.1, 53.0, 35.1, 31.8, 28.6, 28.5; <sup>19</sup>F NMR (376 MHz, CDCl<sub>3</sub>) δ -104.7; HRMS (ESI) *m/z*: (M + H)<sup>+</sup> Calcd for C<sub>21</sub>H<sub>23</sub>F<sub>2</sub>N<sub>2</sub>O<sub>4</sub>S 437.1341; Found 437.1346.

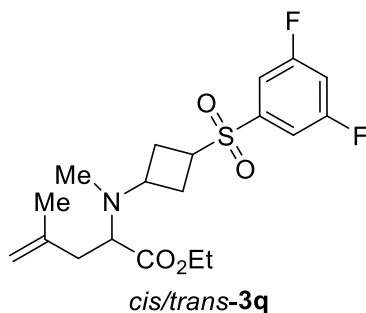

(*cis/trans*)-Ethyl 2-((3-((3,5-difluorophenyl)sulfonyl)cyclobutyl)(methylamino)-4-methylpent-4-enoate (inseparable mixture of ***cis*-3q** and ***trans*-3q**, *cis/trans* = 21:79). Colorless oil (62.6 mg, 78% yield). <sup>1</sup>H NMR (400 MHz, CDCl<sub>3</sub>) δ 7.48-7.41 (m, 2H), 7.14-7.09 (m, 1H), 4.79-4.77 (m, 1H), 4.72-4.61 (m, 1H), 4.20-4.09 (m, 2H), 3.65-3.57 (m, 1.7H), 3.43-3.39 (m, 1.2H), 3.25-3.17 (m, 0.2H), 2.67-2.56 (m, 1.6H), 2.55-2.47 (m, 1H), 2.46-2.41 (m, 0.5H), 2.38-2.30 (m, 2H), 2.29-2.24 (m, 1.5H), 2.21-2.20 (m, 2.3H), 1.73 (s, 3H), 1.32-1.23 (m, 3H); <sup>13</sup>C NMR (100 MHz, CDCl<sub>3</sub>) δ 171.7, 171.3, 163.0 (dd, *J* = 254.2, 11.4 Hz), 163.0 (dd, *J* = 253.9, 11.1 Hz), 141.9, 141.8, 141.5 (t, *J* = 7.8 Hz), 112.8, 112.1 (dd, *J* = 19.6, 8.3 Hz), 111.8 (dd, *J* = 19.6, 8.3 Hz), 109.5 (t, *J* = 24.8 Hz), 109.4 (t, *J* = 25.0 Hz), 61.4, 60.7, 60.4, 60.3, 54.7, 53.0, 51.8, 50.4, 37.8, 37.5, 32.2, 32.1, 29.5, 28.9, 28.7, 28.3, 22.5, 22.4, 14.5; <sup>19</sup>F NMR (376 MHz, CDCl<sub>3</sub>) δ -104.9, -104.9; HRMS (ESI) *m/z*: (M + H)<sup>+</sup> Calcd for C<sub>19</sub>H<sub>26</sub>F<sub>2</sub>NO<sub>4</sub>S 402.1545; Found 402.1551.



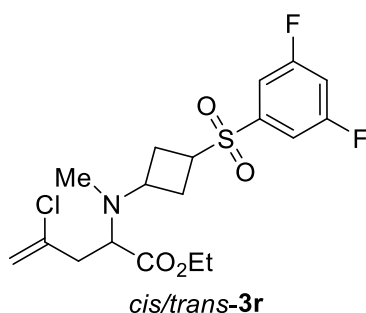

(*cis/trans*)-Ethyl 4-chloro-2-((3-((3,5-difluorophenyl)sulfonyl)cyclobutyl)(methyl)amino)pent-4-enoate (inseparable mixture of *cis*-**3r** and *trans*-**3r**, *cis/trans*= 20:80). Yellow oil (43.0 mg, 51% yield). <sup>1</sup>H NMR (400 MHz, CDCl<sub>3</sub>) δ 7.47-7.40 (m, 2H), 7.14-7.09 (m, 1H), 5.23-5.19 (m, 2H), 4.26-4.12 (m, 2H), 3.70-3.58 (m, 2.6H), 3.47-3.21 (m, 0.4H), 2.79-2.74 (m, 1H), 2.66-2.56 (m, 2.6H), 2.48-2.27 (m, 2.4H), 2.21+2.16 (s, 3H), 1.33-1.25 (m, 3H); <sup>13</sup>C NMR (100 MHz, CDCl<sub>3</sub>) δ 170.9, 170.5, 163.0 (dd, *J* = 254.3, 11.4 Hz), 163.0 (dd, *J* = 254.3, 11.5 Hz), 141.7 (t, *J* = 7.7 Hz), 141.5 (t, *J* = 8.0 Hz), 138.8, 115.2, 115.1, 112.1 (dd, *J* = 19.5, 8.4 Hz), 112.1, 111.8, 109.5 (t, *J* = 24.8 Hz), 109.5, 60.8, 60.7, 60.2, 59.2, 54.7, 52.9, 52.1, 50.3, 39.1, 38.9, 32.1, 31.9, 29.5, 29.0, 28.7, 28.1, 14.5; <sup>19</sup>F NMR (376 MHz, CDCl<sub>3</sub>) δ -104.9, -104.9; HRMS (ESI) *m/z*: (M + H)<sup>+</sup> Calcd for C<sub>18</sub>H<sub>23</sub>ClF<sub>2</sub>NO<sub>4</sub>S 422.0999; Found 422.1003.

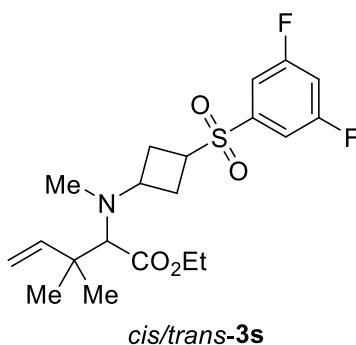

(*cis/trans*)-Ethyl 2-((3-((3,5-difluorophenyl)sulfonyl)cyclobutyl)(methyl)amino)-3,3-dimethylpent-4-enoate (inseparable mixture of *cis*-**3s** and *trans*-**3s**, *cis/trans* = 30:70). Colorless oil (44.9 mg, 54% yield). <sup>1</sup>H NMR (400 MHz, CDCl<sub>3</sub>) δ 7.47-7.41 (m, 2H), 7.14-7.08 (m, 1H), 6.16-6.08 (m, 1H), 5.03-4.98 (m, 2H), 4.19-4.09 (m, 2H), 3.65-3.60 (m, 1.4H), 3.42-3.22 (m, 0.6H), 2.93-2.92 (m, 1H), 2.61-2.51 (m, 1.5H), 2.46-2.36 (m, 0.8H), 2.36-2.17 (m, 4.7H), 1.31-1.24 (m, 3H), 1.14 (d, *J* = 2.4 Hz, 3H), 1.07 (d, *J* = 2.0 Hz, 3H); <sup>13</sup>C NMR (100 MHz, CDCl<sub>3</sub>) δ 170.5, 170.2, 163.1 (dd, *J* = 254.2, 11.4 Hz), 163.0 (dd, *J* = 254.2, 11.2 Hz), 145.3, 145.1, 141.9 (t, *J* = 8.1 Hz), 141.6 (t, *J* = 7.6 Hz), 112.4, 112.1 (dd, *J* = 19.5, 8.3 Hz), 111.8 (d, *J* = 8.2 Hz), 109.5 (t, *J* = 25.0 Hz), 109.4 (t, *J* = 25.0 Hz), 71.0, 70.2, 59.9, 56.2, 53.0, 52.7, 50.1, 40.0, 39.9, 35.2, 35.0, 29.6, 28.7, 28.6, 28.3, 26.2, 26.1, 24.2, 24.1, 14.6, 14.6; <sup>19</sup>F NMR (376 MHz, CDCl<sub>3</sub>) δ -105.0, -105.0; HRMS (ESI) *m/z*: (M + H)<sup>+</sup> Calcd for C<sub>20</sub>H<sub>28</sub>F<sub>2</sub>NO<sub>4</sub>S 416.1702; Found 416.1705.

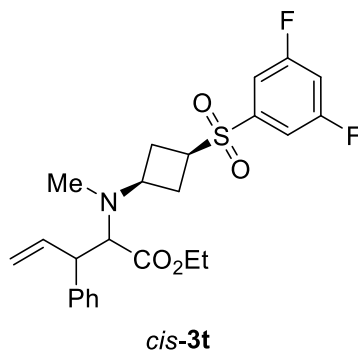

(*cis*)-Ethyl 2-((3-((3,5-difluorophenyl)sulfonyl)cyclobutyl)(methyl)amino)-3-phenylpent-4-enoate (*cis*-**3t**, inseparable mixture of *syn*- and *anti*-isomers). Colorless oil (12.6 mg, 14% yield).  $^1\text{H}$  NMR (500 MHz,  $\text{CDCl}_3$ )  $\delta$  7.40-7.38 (m, 2H), 7.29-7.26 (m, 2H), 7.20 (t,  $J = 7.5$  Hz, 1H), 7.16 (d,  $J = 7.5$  Hz, 2H), 7.11-7.07 (m, 1H), 5.88-5.81 (m, 1H), 5.09-5.02 (m, 2H), 4.24-4.10 (m, 2H), 3.80-3.76 (m, 1H), 3.55 (d,  $J = 11.5$  Hz, 1H), 3.46-3.40 (m, 1H), 3.39-3.33 (m, 1H), 2.51-2.45 (m, 1H), 2.42-2.36 (m, 1H), 2.11 (s, 3H), 2.07-1.97 (m, 2H), 1.31 (t,  $J = 7.0$  Hz, 3H);  $^{13}\text{C}$  NMR (125 MHz,  $\text{CDCl}_3$ )  $\delta$  170.2, 163.0 (dd,  $J = 254.4, 11.3$  Hz), 141.6 (t,  $J = 8.3$  Hz), 140.9, 138.3, 128.5, 128.2, 126.6, 117.0, 112.0 (dd,  $J = 20.9, 7.4$  Hz), 109.5 (t,  $J = 24.6$  Hz), 65.6, 60.4, 54.7, 53.1, 49.4, 31.8, 28.3, 28.0, 14.7;  $^{19}\text{F}$  NMR (471 MHz,  $\text{CDCl}_3$ )  $\delta$  -105.0; HRMS (ESI)  $m/z$ : ( $\text{M} + \text{H}$ ) $^+$  Calcd for  $\text{C}_{24}\text{H}_{28}\text{F}_2\text{NO}_4\text{S}$  464.1702; Found 464.1711.

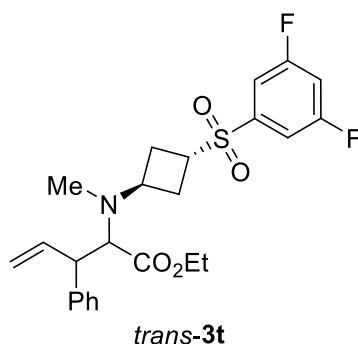

(*trans*)-Ethyl 2-((3-((3,5-difluorophenyl)sulfonyl)cyclobutyl)(methyl)amino)-3-phenylpent-4-enoate (*trans*-**3t**, inseparable mixture of *syn*- and *anti*- isomers). Colorless oil (37.5 mg, 40% yield).  $^1\text{H}$  NMR (400 MHz,  $\text{CDCl}_3$ )  $\delta$  7.47-7.42 (m, 2H), 7.28-7.25 (m, 2H), 7.20-7.15 (m, 3H), 7.13-7.09 (m, 1H), 6.11-6.03 (m, 1H), 5.09-5.00 (m, 2H), 3.94-3.83 (m, 2H), 3.80-3.76 (m, 1H), 3.68-3.58 (m, 2H), 3.56-3.48 (m, 1H), 2.67-2.57 (m, 2H), 2.38-2.31 (m, 2H), 2.27 (s, 3H), 0.99 (t,  $J = 6.4$  Hz, 3H);  $^{13}\text{C}$  NMR (100 MHz,  $\text{CDCl}_3$ )  $\delta$  169.7, 163.1 (dd,  $J = 254.3, 11.3$  Hz), 141.6 (t,  $J = 7.5$  Hz), 140.6, 138.9, 128.6, 128.5, 127.0, 116.3, 112.1 (dd,  $J = 19.6, 8.2$  Hz), 109.5 (t,  $J = 24.8$  Hz), 66.7, 60.1, 54.9, 53.0, 48.9, 31.7, 28.5, 28.3, 14.2;  $^{19}\text{F}$  NMR (376 MHz,  $\text{CDCl}_3$ )  $\delta$  -104.9; HRMS (ESI)  $m/z$ : ( $\text{M} + \text{H}$ ) $^+$  Calcd for  $\text{C}_{24}\text{H}_{28}\text{F}_2\text{NO}_4\text{S}$  464.1702; Found 464.1707.

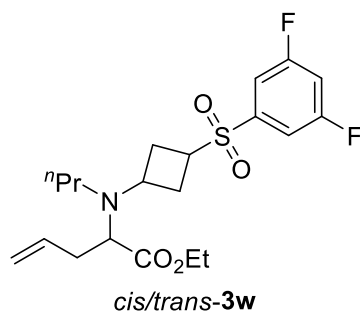

(*cis/trans*)-Ethyl 2-((3-((3,5-difluorophenyl)sulfonyl)cyclobutyl)(propyl)amino)pent-4-enoate (inseparable mixture of *cis*-**3w** and *trans*-**3w**, *cis/trans* = 24:76). Yellow oil (41.6 mg, 50% yield). <sup>1</sup>H NMR (400 MHz, CDCl<sub>3</sub>) δ 7.47-7.40 (m, 2H), 7.12-7.08 (m, 1H), 5.79-5.70 (m, 1H), 5.11-5.02 (m, 2H), 4.17-4.09 (m, 2H), 3.92-3.89 (m, 0.8H), 3.62-3.58 (m, 0.8H), 3.47-3.44 (m, 0.2H), 3.39-3.30 (m, 1H), 2.70-2.58 (m, 2.7H), 2.53-2.44 (m, 2.5H), 2.41-2.26 (m, 3H), 1.45-1.37 (m, 2H), 1.30-1.24 (m, 3H), 0.89-0.83 (m, 3H); <sup>13</sup>C NMR (100 MHz, CDCl<sub>3</sub>) δ 172.9, 163.0 (dd, *J* = 254.2, 11.3 Hz), 142.0 (t, *J* = 8.3 Hz), 141.6 (t, *J* = 8.4 Hz), 134.8, 117.2, 112.1 (dd, *J* = 19.7, 8.3 Hz), 111.8 (dd, *J* = 19.7, 8.1 Hz), 109.5 (t, *J* = 24.8 Hz), 109.4 (t, *J* = 24.5 Hz), 61.7, 61.6, 60.6, 60.5, 53.2, 50.9, 49.9, 49.4, 49.0, 34.6, 34.5, 30.9, 30.2, 29.7, 29.2, 23.0, 22.8, 14.5, 11.8, 11.7; <sup>19</sup>F NMR (376 MHz, CDCl<sub>3</sub>) δ -105.0, -105.0; HRMS (ESI) *m/z*: (M + H)<sup>+</sup> Calcd for C<sub>20</sub>H<sub>28</sub>F<sub>2</sub>NO<sub>4</sub>S 416.1702; Found 416.1691.

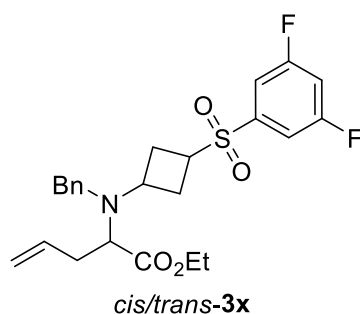

(*cis/trans*)-Ethyl 2-(benzyl(3-((3,5-difluorophenyl)sulfonyl)cyclobutyl)amino)pent-4-enoate (inseparable mixture of *cis*-**3x** and *trans*-**3x**, *cis/trans* = 71:29). Yellow oil (27.8 mg, 30% yield). <sup>1</sup>H NMR (400 MHz, CDCl<sub>3</sub>) δ 7.47-7.38 (m, 2H), 7.37-7.17 (m, 5H), 7.11-7.06 (m, 1H), 5.76-5.66 (m, 1H), 5.09-5.01 (m, 2H), 4.22-4.12 (m, 2H), 4.06-3.93 (m, 1.7H), 3.76-3.64 (m, 0.3H), 3.63-3.48 (m, 2H), 3.44-3.30 (m, 1.3H), 2.80-2.74 (m, 0.3 H), 2.64-2.57 (m, 1H), 2.54-2.47 (m, 1.4H), 2.43-2.33 (m, 2.1H), 2.25-2.20 (m, 0.6H), 2.18-2.12 (m, 0.3H), 1.33-1.26 (m, 3H); <sup>13</sup>C NMR (100 MHz, CDCl<sub>3</sub>) δ 172.6, 163.0 (dd, *J* = 254.2, 11.3 Hz), 141.5 (t, *J* = 6.4 Hz), 139.8, 134.7, 129.4, 128.4, 128.4, 127.2, 117.4, 112.0 (dd, *J* = 19.5, 8.3 Hz), 111.7, 109.5 (t, *J* = 24.9 Hz), 70.3, 64.0, 61.7, 61.2, 60.7, 60.6, 53.3, 51.5, 50.9, 50.3, 34.6, 34.5, 31.6, 30.7, 30.0, 29.8, 29.3, 14.5; <sup>19</sup>F NMR (376 MHz, CDCl<sub>3</sub>) δ -104.9, -104.9; HRMS (ESI) *m/z*: (M + H)<sup>+</sup> Calcd for C<sub>24</sub>H<sub>28</sub>F<sub>2</sub>NO<sub>4</sub>S 464.1702; Found 464.1697.

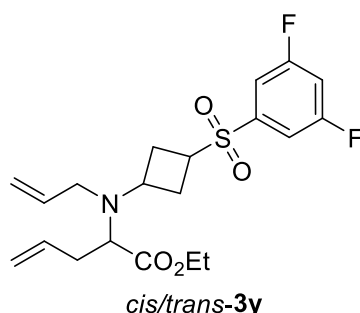

(*cis/trans*)-Ethyl 2-(allyl(3-((3,5-difluorophenyl)sulfonyl)cyclobutyl)amino)pent-4-enoate (inseparable mixture of *cis*-**3y** and *trans*-**3y**, *cis/trans* = 19:81). Colorless oil (38.0 mg, 46% yield). <sup>1</sup>H NMR (400 MHz, CDCl<sub>3</sub>) δ 7.48-7.39 (m, 2H), 7.14-7.07 (m, 1H), 5.81-5.69 (m, 2H), 5.22-5.02 (m, 4H), 4.19-4.10 (m, 2H), 3.95-3.87 (m, 0.8H), 3.63-3.55 (m, 0.8H), 3.50-3.32 (m, 2.4H), 3.18-3.06 (m, 1H), 2.62-2.53 (m, 2H), 2.52-2.47 (m, 1.3H), 2.41-2.29 (m, 2.7H), 1.31-1.23 (m, 3H); <sup>13</sup>C NMR (100 MHz, CDCl<sub>3</sub>) δ 172.8, 172.5, 163.1 (dd, *J* = 254.2, 11.3 Hz), 142.0 (t, *J* = 9.0 Hz), 141.7 (t, *J* = 8.3 Hz), 137.3, 137.1, 134.8, 134.7, 117.3, 117.3, 117.0, 116.8, 112.1 (dd, *J* = 19.7, 8.2 Hz), 111.5 (dd, *J* = 19.8, 8.3 Hz), 109.5 (t, *J* = 24.7 Hz), 109.4 (t, *J* = 25.1 Hz), 61.6, 61.3, 60.6, 60.6, 53.3, 50.9, 50.3, 50.2, 50.0, 44.5, 38.6, 34.5, 30.8, 30.0, 29.6, 29.2, 22.0, 14.5; <sup>19</sup>F NMR (376 MHz, CDCl<sub>3</sub>) δ -104.9, -105.0, -105.0; HRMS (ESI) *m/z*: (M + H)<sup>+</sup> Calcd for C<sub>20</sub>H<sub>26</sub>F<sub>2</sub>NO<sub>4</sub>S 414.1545; Found 414.1551.

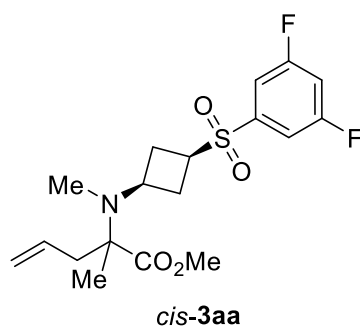

(*cis*)-Methyl 2-((3-((3,5-difluorophenyl)sulfonyl)cyclobutyl)(methyl)amino)-2-methylpent-4-enoate (*cis*-**3aa**). Colorless oil (8.3 mg, 11% yield). <sup>1</sup>H NMR (400 MHz, CDCl<sub>3</sub>) δ 7.46-7.38 (m, 2H), 7.12-7.07 (m, 1H), 5.74-5.63 (m, 1H), 5.10-5.05 (m, 2H), 3.68 (s, 3H), 3.56-3.49 (m, 1H), 3.40-3.32 (m, 1H), 2.74-2.63 (m, 2H), 2.48 (d, *J* = 7.2 Hz, 2H), 2.38 (s, 3H), 2.26-2.21 (m, 2H), 1.25 (s, 3H); <sup>13</sup>C NMR (100 MHz, CDCl<sub>3</sub>) δ 174.7, 163.0 (dd, *J* = 254.4, 11.4 Hz), 141.9 (t, *J* = 7.7 Hz), 133.2, 118.8, 111.8 (dd, *J* = 19.6, 8.2 Hz), 109.5 (t, *J* = 24.8 Hz), 66.5, 52.1, 51.0, 49.2, 41.6, 31.1, 30.3, 29.2, 19.9; <sup>19</sup>F NMR (376 MHz, CDCl<sub>3</sub>) δ -104.8; HRMS (ESI) *m/z*: (M + H)<sup>+</sup> Calcd for C<sub>18</sub>H<sub>24</sub>F<sub>2</sub>NO<sub>4</sub>S 388.1389; Found 388.1387.

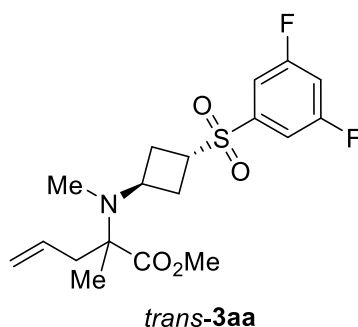

(*trans*)-Methyl 2-((3-((3,5-difluorophenyl)sulfonyl)cyclobutyl)(methyl)amino)-2-methylpent-4-enoate (*trans*-**3aa**). Colorless oil (40.5 mg, 52% yield).  $^1\text{H}$  NMR (500 MHz,  $\text{CDCl}_3$ )  $\delta$  7.48-7.41 (m, 2H), 7.14-7.08 (m, 1H), 5.74-5.63 (m, 1H), 5.12-5.07 (m, 2H), 4.07-3.98 (m, 1H), 3.69 (s, 3H), 3.59-3.52 (m, 1H), 2.57-2.45 (m, 4H), 2.47 (d,  $J = 9.0$  Hz, 2H), 2.28 (s, 3H), 1.25 (s, 3H);  $^{13}\text{C}$  NMR (125 MHz,  $\text{CDCl}_3$ )  $\delta$  174.9, 163.0 (dd,  $J = 254.3, 11.4$  Hz), 141.6 (t,  $J = 7.9$  Hz), 133.2, 118.7, 112.0 (dd,  $J = 20.8, 7.4$  Hz), 109.5 (t,  $J = 24.8$  Hz), 66.3, 53.2, 52.0, 51.7, 41.8, 30.3, 29.1, 28.9, 19.3;  $^{19}\text{F}$  NMR (471 MHz,  $\text{CDCl}_3$ )  $\delta$  -104.90; HRMS (ESI)  $m/z$ : ( $\text{M} + \text{H}$ ) $^+$  Calcd for  $\text{C}_{18}\text{H}_{24}\text{F}_2\text{NO}_4\text{S}$  388.1389; Found 388.1381.

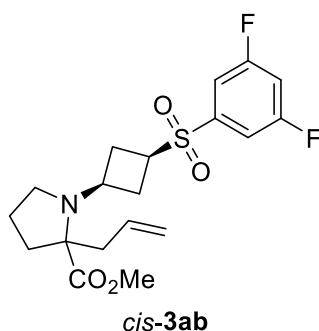

(*cis*)-Methyl 2-allyl-1-(3-((3,5-difluorophenyl)sulfonyl)cyclobutyl)pyrrolidine-2-carboxylate (*cis*-**3ab**). Colorless oil (19.7 mg, 25% yield).  $^1\text{H}$  NMR (500 MHz,  $\text{CDCl}_3$ )  $\delta$  7.44-7.38 (m, 2H), 7.11-7.07 (m, 1H), 5.74-5.66 (m, 1H), 5.09-5.05 (m, 2H), 3.64 (s, 3H), 3.52-3.45 (m, 1H), 3.41-3.35 (m, 1H), 3.10-3.06 (m, 1H), 2.93-2.88 (m, 1H), 2.73 (q,  $J = 10.0$  Hz, 1H), 2.66 (q,  $J = 10.0$  Hz, 1H), 2.58 (dd,  $J = 14.0, 7.5$  Hz, 1H), 2.30-2.24 (m, 2H), 2.19-2.11 (m, 2H), 1.87-1.76 (m, 3H);  $^{13}\text{C}$  NMR (125 MHz,  $\text{CDCl}_3$ )  $\delta$  175.3, 163.0 (dd,  $J = 254.1, 11.4$  Hz), 142.1 (t,  $J = 7.6$  Hz), 133.8, 118.3, 111.8 (dd,  $J = 20.9, 7.4$  Hz), 109.4 (t,  $J = 24.8$  Hz), 69.4, 51.8, 51.3, 46.8, 46.1, 39.9, 34.4, 30.4, 27.8, 21.9;  $^{19}\text{F}$  NMR (471 MHz,  $\text{CDCl}_3$ )  $\delta$  -105.0; HRMS (ESI)  $m/z$ : ( $\text{M} + \text{H}$ ) $^+$  Calcd for  $\text{C}_{19}\text{H}_{24}\text{F}_2\text{NO}_4\text{S}$  400.1389; Found 400.1387.

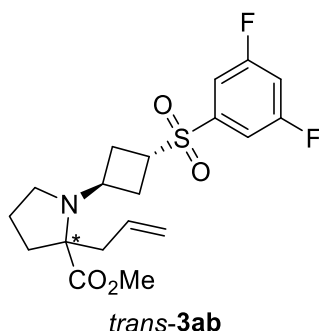

(*trans*)-Methyl 2-allyl-1-(3-((3,5-difluorophenyl)sulfonyl)cyclobutyl)pyrrolidine-2-carboxylate (*trans*-**3ab**). Colorless oil (50.6 mg, 63% yield),  $[\alpha]_D^{20} = -1.2$  ( $c = 0.50$ ,  $\text{CHCl}_3$ ).  $^1\text{H NMR}$  (500 MHz,  $\text{CDCl}_3$ )  $\delta$  7.47-7.43 (m, 2H), 7.13-7.09 (m, 1H), 5.74-5.66 (m, 1H), 5.11-5.06 (m, 2H), 3.95-3.89 (m, 1H), 3.68 (s, 3H), 3.63-3.58 (m, 1H), 2.99-2.95 (m, 1H), 2.86-2.82 (m, 1H), 2.65-2.45 (m, 5H), 2.31-2.26 (m, 1H), 2.18-2.12 (m, 1H), 1.87-1.75 (m, 3H);  $^{13}\text{C NMR}$  (125 MHz,  $\text{CDCl}_3$ )  $\delta$  174.9, 163.0 (dd,  $J = 254.1, 11.4$  Hz), 141.6 (t,  $J = 7.9$  Hz), 133.7, 118.3, 112.0 (dd,  $J = 20.8, 7.4$  Hz), 109.4 (t,  $J = 24.9$  Hz), 69.6, 53.6, 51.8, 49.6, 46.1, 39.6, 34.4, 29.9, 27.5, 21.8;  $^{19}\text{F NMR}$  (471 MHz,  $\text{CDCl}_3$ )  $\delta$  -105.0; HRMS (ESI)  $m/z$ : ( $\text{M} + \text{H}$ ) $^+$  Calcd for  $\text{C}_{19}\text{H}_{24}\text{F}_2\text{NO}_4\text{S}$  400.1389; Found 400.1382. The ee was determined to be 19% by HPLC analysis (Chiralpak OD-H column,  $\lambda = 254$  nm, hexane/isopropanol = 90/10, flow rate = 1.0 mL/min):  $t_R$ (major) = 7.9 min,  $t_R$ (minor) = 9.1 min.

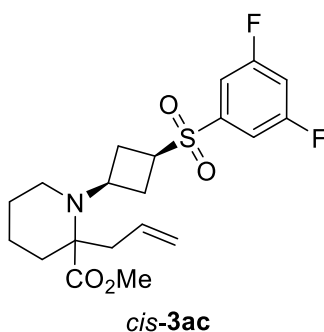

(*cis*)-Methyl 2-allyl-1-(3-((3,5-difluorophenyl)sulfonyl)cyclobutyl)piperidine-2-carboxylate (*cis*-**3ac**). Colorless oil (14.5 mg, 18% yield).  $^1\text{H NMR}$  (400 MHz,  $\text{CDCl}_3$ )  $\delta$  7.47-7.39 (m, 2H), 7.12-7.06 (m, 1H), 5.78-5.68 (m, 1H), 5.10-5.04 (m, 2H), 3.78-3.68 (m, 1H), 3.66 (s, 3H), 3.37-3.28 (m, 1H), 3.02-2.97 (m, 1H), 2.88-2.81 (m, 1H), 2.65-2.50 (m, 3H), 2.40-2.35 (m, 1H), 2.31-2.18 (m, 2H), 1.96-1.91 (m, 1H), 1.69-1.60 (m, 2H), 1.56-1.52 (m, 1H), 1.48-1.39 (m, 1H), 1.33-1.28 (m, 1H);  $^{13}\text{C NMR}$  (100 MHz,  $\text{CDCl}_3$ )  $\delta$  175.7, 163.0 (dd,  $J = 254.1, 11.3$  Hz), 142.2 (t,  $J = 7.7$  Hz), 133.1, 118.4, 111.8 (dd,  $J = 19.6, 8.2$  Hz), 109.3 (t,  $J = 24.8$  Hz), 66.6, 51.7, 51.1, 48.1, 42.7, 41.1, 33.9, 30.1, 28.7, 25.9, 22.0;  $^{19}\text{F NMR}$  (376 MHz,  $\text{CDCl}_3$ )  $\delta$  -105.1; HRMS (ESI)  $m/z$ : ( $\text{M} + \text{H}$ ) $^+$  Calcd for  $\text{C}_{20}\text{H}_{26}\text{F}_2\text{NO}_4\text{S}$  414.1545; Found 414.1542.

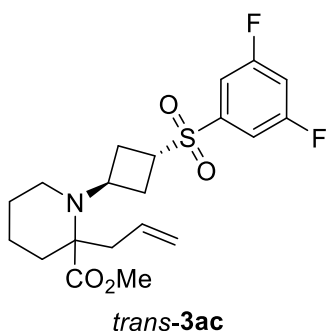

(*trans*)-Methyl 2-allyl-1-(3-((3,5-difluorophenyl)sulfonyl)cyclobutyl)piperidine-2-carboxylate (*trans*-**3ac**). Colorless oil (45.9 mg, 55% yield). <sup>1</sup>H NMR (400 MHz, CDCl<sub>3</sub>) δ 7.48-7.42 (m, 2H), 7.14-7.07 (m, 1H), 5.79-5.69 (m, 1H), 5.16-5.11 (m, 2H), 4.29-4.20 (m, 1H), 3.67 (s, 3H), 3.53-3.46 (m, 1H), 2.81-2.72 (m, 2H), 2.62-2.47 (m, 4H), 2.45-2.38 (m, 2H), 1.98-1.92 (m, 1H), 1.63-1.52 (m, 3H), 1.47-1.37 (m, 1H), 1.35-1.24 (m, 1H); <sup>13</sup>C NMR (100 MHz, CDCl<sub>3</sub>) δ 175.6, 163.0 (dd, *J* = 254.1, 11.4 Hz), 141.9 (t, *J* = 7.9 Hz), 132.9, 118.6, 112.1 (dd, *J* = 19.4, 8.3 Hz), 109.4 (t, *J* = 25.0 Hz), 66.5, 53.3, 51.7, 50.6, 42.4, 40.9, 33.8, 30.0, 28.2, 25.8, 21.9; <sup>19</sup>F NMR (376 MHz, CDCl<sub>3</sub>) δ -105.1; HRMS (ESI) *m/z*: (*M* + *H*)<sup>+</sup> Calcd for C<sub>20</sub>H<sub>26</sub>F<sub>2</sub>NO<sub>4</sub>S 414.1545; Found 414.1536.

### Chemical transformations of the products (Scheme 3)

(1) Hydrolysis followed by amination<sup>1</sup>

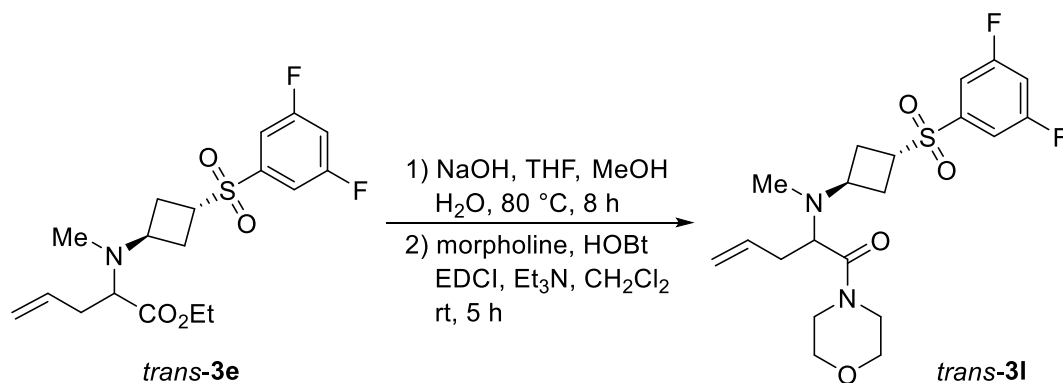

To a solution of ester *trans*-**3e** (38.7 mg, 0.10 mmol) in tetrahydrofuran (1.0 mL) and methanol (1.0 mL) were added sodium hydroxide (20.0 mg, 0.50 mmol) and water (1.0 mL). The mixture was heated at 80 °C for 8 h, cooled to room temperature, added hydrochloric acid (1.0 M) until pH = 7.0, and extracted with ethyl acetate (3 × 5 mL). The organic layer was dried over anhydrous sodium sulfate and concentrated to give a crude acid.

The crude acid was transferred into a 10 mL round-bottom flask, to which were added morpholine (10.5 mg, 0.12 mmol), HOBt (20.3 mg, 0.15 mmol), EDCI (28.8 mg, 0.15 mmol), and triethylamine (15.2 mg, 0.15 mmol). The mixture was stirred at room temperature for 3 h, concentrated, and subjected to silica gel chromatography, using a mixture of ethyl acetate and petroleum ether (1:2) as the eluent, to give amide *trans*-**3l** (22.7 mg, 53% yield, 2 steps) as a colorless oil. <sup>1</sup>H NMR (400 MHz, CDCl<sub>3</sub>) δ 7.46-7.42 (m, 2H), 7.14-7.10 (m, 1H), 5.77-5.68 (m, 1H), 5.12-5.04 (m, 2H), 3.75-3.51 (m, 10H), 3.46-3.42 (m, 1H), 2.66-2.55 (m, 3H), 2.44-2.38 (m, 2H), 2.26-2.23 (m, 4H); <sup>13</sup>C NMR (100 MHz, CDCl<sub>3</sub>) δ 169.5, 163.1 (dd, *J* = 254.6, 11.4 Hz), 141.4 (t, *J* = 8.0 Hz), 135.2, 117.6, 112.1 (dd, *J*

= 19.7, 8.2 Hz), 109.6 (t,  $J = 24.8$  Hz), 67.2, 67.0, 60.8, 54.3, 53.0, 46.4, 42.5, 32.4, 30.5, 28.8, 28.1;  $^{19}\text{F}$  NMR (376 MHz,  $\text{CDCl}_3$ )  $\delta$  -104.7; HRMS (ESI)  $m/z$ : ( $\text{M} + \text{H}$ ) $^+$  Calcd for  $\text{C}_{20}\text{H}_{27}\text{F}_2\text{N}_2\text{O}_4\text{S}$  429.1654; Found 429.1665.

## (2) Desulfonylation<sup>2</sup>

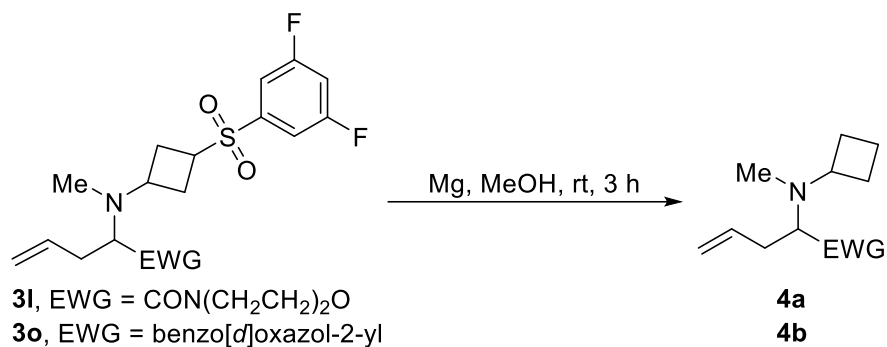

Amine **3I** or **3O** (0.10 mmol) was dissolved in methanol (2.5 mL) and freshly activated magnesium turnings (97.2 mg, 4.0 mmol) were added. After sonication for 5 min, the reaction mixture was stirred at room temperature until completion. The mixture was diluted with ethyl acetate (5 mL), washed successively with saturated aqueous  $\text{NH}_4\text{Cl}$  (5 mL) and brine (5 mL), dried over anhydrous sodium sulfate, concentrated under reduced pressure, and purified by silica gel chromatography to give compound **4a** or **4b**.

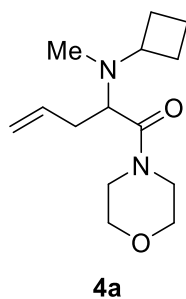

2-(Cyclobutyl(methyl)amino)-1-morpholinopent-4-en-1-one (**4a**). Yellow oil (19.9 mg, 79% yield).  $^1\text{H}$  NMR (400 MHz,  $\text{CDCl}_3$ )  $\delta$  5.81-5.71 (m, 1H), 5.09-4.99 (m, 2H), 3.85-3.75 (m, 2H), 3.74-3.65 (m, 3H), 3.63-3.58 (m, 1H), 3.50-3.42 (m, 3H), 3.19-3.11 (m, 1H), 2.69-2.61 (m, 1H), 2.25-2.18 (m, 1H), 2.16 (s, 3H), 2.02-1.95 (m, 2H), 1.89-1.76 (m, 2H), 1.69-1.54 (m, 2H);  $^{13}\text{C}$  NMR (100 MHz,  $\text{CDCl}_3$ )  $\delta$  170.0, 136.4, 116.8, 67.2, 67.1, 60.4, 57.3, 46.4, 42.5, 33.0, 28.8, 28.7, 27.6, 14.3; HRMS (ESI)  $m/z$ : ( $\text{M} + \text{H}$ ) $^+$  Calcd for  $\text{C}_{14}\text{H}_{25}\text{N}_2\text{O}_2$  253.1911; Found 253.1904.

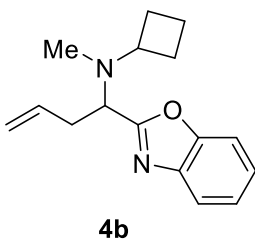



*N*-(1-(Benzo[*d*]oxazol-2-yl)but-3-en-1-yl)-*N*-methylcyclobutanamine (**4b**). Colorless oil (21.2 mg, 83% yield). <sup>1</sup>H NMR (400 MHz, CDCl<sub>3</sub>) δ 7.76-7.71 (m, 1H), 7.55-7.51 (m, 1H), 7.35-7.30 (m, 2H), 5.86-5.76 (m, 1H), 5.13-4.98 (m, 2H), 4.07-4.03 (m, 1H), 3.08-3.00 (m, 1H), 2.90-2.82 (m, 1H), 2.72-2.65 (m, 1H), 2.25-2.13 (m, 4H), 1.99-1.80 (m, 3H), 1.70-1.56 (m, 2H); <sup>13</sup>C NMR (100 MHz, CDCl<sub>3</sub>) δ 165.2, 150.6, 140.9, 134.7, 124.9, 124.3, 120.2, 117.4, 110.8, 57.9, 57.8, 34.7, 32.7, 28.3, 28.0, 14.1; HRMS (ESI) *m/z*: (M + H)<sup>+</sup> Calcd for C<sub>16</sub>H<sub>21</sub>N<sub>2</sub>O 257.1648; Found 257.1643.

## References

1. J. Zhang, Z.-X. Chen, T. Du, B. Li, Y. Gu and S.-K. Tian, *Org. Lett.*, 2016, **18**, 4872–4875.
2. R. Gianatassio, J. M. Lopchuk, J. Wang, C.-M. Pan, L. R. Malins, L. Prieto, T. A. Brandt, M. R. Collins, G. M. Gallego, N. W. Sach, J. E. Spangler, H. Zhu, J. Zhu and P. S. Baran, *Science*, 2016, **351**, 241–246.

### Crystal data of compound *cis-3o*

The crystal of *cis-3o* were obtained by leaving alone its solution in hexane and CHCl<sub>3</sub> at room temperature in the open air for seven days. The relative configuration of compound *cis-3o* were assigned by single crystal X-ray analysis. The crystal data of compound *cis-3o* have been deposited in CCDC with number 2069934.

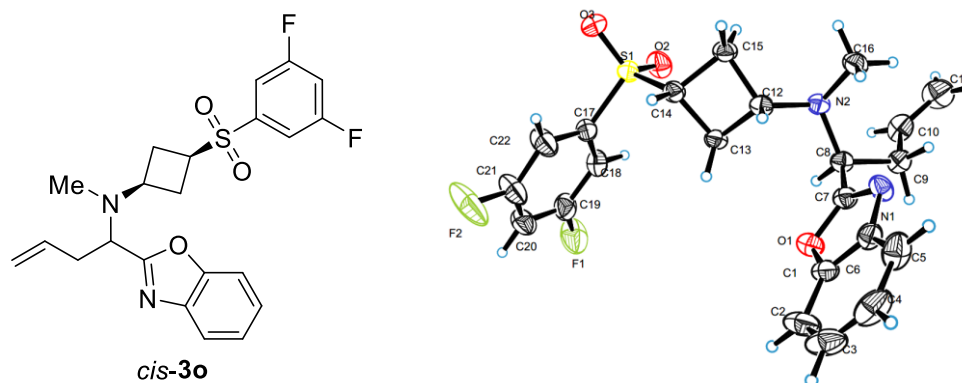

Molecular structure of *cis-3o* was obtained by single-crystal X-ray diffraction studies with the ellipsoid contour at 35% probability levels.

**Table 1 Crystal data and structure refinement for drh12-99-11.**

|                                    |                                                                                |
|------------------------------------|--------------------------------------------------------------------------------|
| Identification code                | drh12-99-11                                                                    |
| Empirical formula                  | C <sub>22</sub> H <sub>22</sub> F <sub>2</sub> N <sub>2</sub> O <sub>3</sub> S |
| Formula weight                     | 432.47                                                                         |
| Temperature/K                      | 291(2)                                                                         |
| Crystal system                     | monoclinic                                                                     |
| Space group                        | P2 <sub>1</sub> /c                                                             |
| a/Å                                | 12.21316(16)                                                                   |
| b/Å                                | 17.3615(2)                                                                     |
| c/Å                                | 10.31999(14)                                                                   |
| α/°                                | 90                                                                             |
| β/°                                | 98.3484(13)                                                                    |
| γ/°                                | 90                                                                             |
| Volume/Å <sup>3</sup>              | 2165.05(5)                                                                     |
| Z                                  | 4                                                                              |
| ρ <sub>calc</sub> /cm <sup>3</sup> | 1.327                                                                          |
| μ/mm <sup>-1</sup>                 | 1.703                                                                          |
| F(000)                             | 904.0                                                                          |
| Crystal size/mm <sup>3</sup>       | 0.21 × 0.2 × 0.16                                                              |
| Radiation                          | CuKα (λ = 1.54184)                                                             |
| 2θ range for data collection/°     | 7.316 to 139.78                                                                |
| Index ranges                       | -14 ≤ h ≤ 14, -16 ≤ k ≤ 20, -9 ≤ l ≤ 12                                        |

|                                                |                                                                  |
|------------------------------------------------|------------------------------------------------------------------|
| Reflections collected                          | 8742                                                             |
| Independent reflections                        | 4001 [ $R_{\text{int}} = 0.0168$ , $R_{\text{sigma}} = 0.0183$ ] |
| Data/restraints/parameters                     | 4001/1/273                                                       |
| Goodness-of-fit on $F^2$                       | 1.030                                                            |
| Final R indexes [ $I \geq 2\sigma(I)$ ]        | $R_1 = 0.0468$ , $wR_2 = 0.1295$                                 |
| Final R indexes [all data]                     | $R_1 = 0.0515$ , $wR_2 = 0.1348$                                 |
| Largest diff. peak/hole / $e \text{ \AA}^{-3}$ | 0.34/-0.26                                                       |

**Table 2 Fractional Atomic Coordinates ( $\times 10^4$ ) and Equivalent Isotropic Displacement Parameters ( $\text{\AA}^2 \times 10^3$ ) for drh12-99-11.  $U_{\text{eq}}$  is defined as 1/3 of of the trace of the orthogonalised  $U_{\text{H}}$  tensor.**

| Atom | <i>x</i>   | <i>y</i>   | <i>z</i>   | $U(\text{eq})$ |
|------|------------|------------|------------|----------------|
| S1   | 6447.7(4)  | 2758.3(3)  | 1964.6(5)  | 60.57(19)      |
| O1   | 3996.5(12) | 4539.4(8)  | 6089.7(14) | 62.6(4)        |
| N2   | 3112.9(12) | 3874.7(9)  | 2957.7(14) | 47.6(4)        |
| N1   | 2243.1(13) | 4144.5(11) | 5650.5(14) | 56.5(4)        |
| O2   | 6175.6(14) | 3311.7(11) | 935.9(14)  | 78.0(5)        |
| O3   | 6561.2(15) | 1965.7(11) | 1606.9(18) | 88.0(6)        |
| F1   | 9454.6(15) | 4714.2(11) | 3386(3)    | 134.5(8)       |
| C12  | 3987.9(15) | 3337.8(10) | 3443.0(17) | 48.6(4)        |
| C8   | 3161.2(16) | 4573.0(11) | 3773.8(17) | 49.7(4)        |
| C7   | 3111.8(16) | 4412.9(11) | 5191.4(18) | 51.8(4)        |
| C13  | 5194.3(15) | 3616.0(11) | 3557.0(18) | 50.7(4)        |
| C14  | 5478.9(17) | 2815.2(11) | 3070.5(18) | 52.0(4)        |
| C15  | 4251.1(17) | 2709.2(11) | 2486(2)    | 55.2(5)        |
| C6   | 2576.9(18) | 4097.7(12) | 7005.6(18) | 58.2(5)        |
| C1   | 3647.5(18) | 4344.4(11) | 7261.8(19) | 56.7(5)        |
| C9   | 2275.7(18) | 5169.0(12) | 3270(2)    | 59.6(5)        |
| F2   | 9690(2)    | 2351.5(16) | 5535(3)    | 171.2(13)      |
| C16  | 2047.7(17) | 3476.8(13) | 2768(2)    | 61.7(5)        |
| C17  | 7686.8(17) | 3061.2(13) | 2930(2)    | 59.4(5)        |
| C18  | 8080.5(18) | 3795.2(14) | 2767(2)    | 69.4(6)        |
| C19  | 9033.0(19) | 4009.1(16) | 3547(3)    | 80.0(7)        |
| C10  | 2223(2)    | 5361.8(14) | 1858(2)    | 76.6(7)        |
| C5   | 2007(2)    | 3855.9(18) | 7987(2)    | 85.9(8)        |
| C20  | 9591(2)    | 3543.9(18) | 4473(3)    | 85.5(8)        |
| C22  | 8213(2)    | 2562.4(17) | 3862(3)    | 87.5(8)        |
| C2   | 4224(3)    | 4365.5(15) | 8523(3)    | 89.6(9)        |
| C4   | 2600(4)    | 3891.6(19) | 9250(3)    | 100.9(11)      |

|     |         |            |         |           |
|-----|---------|------------|---------|-----------|
| C3  | 3667(4) | 4136.6(17) | 9494(3) | 101.4(11) |
| C21 | 9159(2) | 2826.5(19) | 4616(3) | 97.1(9)   |
| C11 | 1320(3) | 5405.3(19) | 1016(3) | 106.6(10) |

**Table 3 Anisotropic Displacement Parameters ( $\text{\AA}^2 \times 10^3$ ) for drh12-99-11. The Anisotropic displacement factor exponent takes the form:  $-2\pi^2[h^2a^{*2}U_{11}+2hka^*b^*U_{12}+\dots]$ .**

| Atom | U <sub>11</sub> | U <sub>22</sub> | U <sub>33</sub> | U <sub>23</sub> | U <sub>13</sub> | U <sub>12</sub> |
|------|-----------------|-----------------|-----------------|-----------------|-----------------|-----------------|
| S1   | 60.3(3)         | 72.0(4)         | 46.5(3)         | -11.5(2)        | -2.2(2)         | 11.0(2)         |
| O1   | 65.3(8)         | 60.8(8)         | 58.4(8)         | -2.7(6)         | -1.8(6)         | -8.6(6)         |
| N2   | 49.6(8)         | 50.2(8)         | 42.4(7)         | -0.9(6)         | 4.9(6)          | -3.8(6)         |
| N1   | 46.1(8)         | 85.9(12)        | 36.8(8)         | 6.3(7)          | 3.9(6)          | -0.5(8)         |
| O2   | 77.9(10)        | 111.3(13)       | 43.3(7)         | 8.9(8)          | 3.4(7)          | 12.7(9)         |
| O3   | 84.6(11)        | 85.5(12)        | 88.4(12)        | -40.7(10)       | -6.7(9)         | 19.0(9)         |
| F1   | 73.6(10)        | 94.9(12)        | 229(3)          | 14.6(14)        | 3.4(13)         | -18.7(9)        |
| C12  | 54.8(10)        | 49.6(9)         | 40.8(9)         | 3.8(7)          | 5.2(7)          | -3.5(8)         |
| C8   | 52.7(10)        | 51.9(10)        | 45.2(9)         | -1.2(7)         | 9.4(7)          | -6.2(8)         |
| C7   | 57.0(10)        | 53.1(10)        | 45.0(9)         | -3.8(8)         | 6.3(8)          | -0.2(8)         |
| C13  | 53.0(10)        | 54.1(10)        | 42.8(9)         | -6.3(7)         | -0.7(7)         | -2.8(8)         |
| C14  | 58.4(11)        | 50.0(10)        | 44.5(9)         | 1.0(7)          | -2.8(8)         | 3.9(8)          |
| C15  | 60.1(11)        | 45.2(10)        | 57.8(11)        | -4.4(8)         | 0.1(9)          | -5.4(8)         |
| C6   | 67.3(12)        | 67.2(12)        | 40.7(9)         | 4.0(8)          | 9.2(8)          | 18.1(10)        |
| C1   | 74.7(13)        | 46.3(10)        | 45.4(10)        | -4.7(8)         | -3.3(9)         | 3.9(9)          |
| C9   | 67.0(12)        | 57.4(11)        | 55.0(11)        | 2.8(9)          | 11.2(9)         | 4.3(9)          |
| F2   | 123.3(18)       | 186(2)          | 174(2)          | 81.9(19)        | -82.6(17)       | -28.8(15)       |
| C16  | 54.2(11)        | 68.0(13)        | 61.4(12)        | -7.2(10)        | 3.4(9)          | -10.6(9)        |
| C17  | 53.8(11)        | 69.5(13)        | 53.8(11)        | -5.2(9)         | 4.1(8)          | 9.1(9)          |
| C18  | 54.3(12)        | 76.3(15)        | 79.1(15)        | 5.9(12)         | 14.9(10)        | 10.5(10)        |
| C19  | 50.7(12)        | 76.1(15)        | 115(2)          | -5.2(14)        | 16.8(13)        | -1.7(11)        |
| C10  | 97.6(18)        | 70.3(14)        | 63.9(14)        | 14.1(11)        | 18.4(13)        | 16.5(13)        |
| C5   | 88.7(17)        | 109(2)          | 66.3(15)        | 21.5(14)        | 31.6(13)        | 24.8(15)        |
| C20  | 51.0(12)        | 109(2)          | 93.4(18)        | -12.2(16)       | 0.2(12)         | -7.4(13)        |
| C22  | 73.6(16)        | 85.6(17)        | 93.6(19)        | 15.9(15)        | -20.3(14)       | -6.7(13)        |
| C2   | 124(2)          | 70.4(15)        | 61.3(15)        | -4.8(12)        | -29.7(15)       | -5.2(15)        |
| C4   | 165(3)          | 94(2)           | 51.2(14)        | 17.7(13)        | 40.9(18)        | 41(2)           |
| C3   | 173(4)          | 78.1(18)        | 45.6(13)        | -2.1(12)        | -10.1(17)       | 14(2)           |
| C21  | 71.7(16)        | 114(2)          | 94(2)           | 21.8(17)        | -24.9(15)       | -2.7(15)        |
| C11  | 139(3)          | 108(2)          | 66.9(16)        | 13.7(15)        | -4.5(17)        | 20(2)           |

**Table 4 Bond Lengths for drh12-99-11.**

| Atom | Atom | Length/Å   | Atom | Atom | Length/Å |
|------|------|------------|------|------|----------|
| S1   | O2   | 1.4346(17) | C14  | C15  | 1.544(3) |
| S1   | O3   | 1.4365(18) | C6   | C1   | 1.365(3) |
| S1   | C14  | 1.762(2)   | C6   | C5   | 1.375(3) |
| S1   | C17  | 1.767(2)   | C1   | C2   | 1.388(3) |
| O1   | C7   | 1.336(2)   | C9   | C10  | 1.488(3) |
| O1   | C1   | 1.382(3)   | F2   | C21  | 1.350(3) |
| N2   | C12  | 1.451(2)   | C17  | C18  | 1.381(3) |
| N2   | C8   | 1.472(2)   | C17  | C22  | 1.382(3) |
| N2   | C16  | 1.461(2)   | C18  | C19  | 1.366(4) |
| N1   | C7   | 1.309(3)   | C19  | C20  | 1.357(4) |
| N1   | C6   | 1.401(2)   | C10  | C11  | 1.303(4) |
| F1   | C19  | 1.348(3)   | C5   | C4   | 1.398(4) |
| C12  | C13  | 1.539(3)   | C20  | C21  | 1.369(4) |
| C12  | C15  | 1.536(3)   | C22  | C21  | 1.374(4) |
| C8   | C7   | 1.499(3)   | C2   | C3   | 1.349(5) |
| C8   | C9   | 1.532(3)   | C4   | C3   | 1.360(5) |
| C13  | C14  | 1.535(3)   |      |      |          |

**Table 5 Bond Angles for drh12-99-11.**

| Atom | Atom | Atom | Angle/°    | Atom | Atom | Atom | Angle/°    |
|------|------|------|------------|------|------|------|------------|
| O2   | S1   | O3   | 118.16(11) | C1   | C6   | N1   | 107.88(17) |
| O2   | S1   | C14  | 109.67(9)  | C1   | C6   | C5   | 121.8(2)   |
| O2   | S1   | C17  | 107.77(11) | C5   | C6   | N1   | 130.4(2)   |
| O3   | S1   | C14  | 108.61(11) | O1   | C1   | C2   | 129.5(2)   |
| O3   | S1   | C17  | 108.86(10) | C6   | C1   | O1   | 108.42(16) |
| C14  | S1   | C17  | 102.65(9)  | C6   | C1   | C2   | 122.1(2)   |
| C7   | O1   | C1   | 104.24(16) | C10  | C9   | C8   | 114.34(18) |
| C12  | N2   | C8   | 111.41(14) | C18  | C17  | S1   | 119.41(17) |
| C12  | N2   | C16  | 109.83(15) | C18  | C17  | C22  | 121.9(2)   |
| C16  | N2   | C8   | 115.27(15) | C22  | C17  | S1   | 118.68(19) |
| C7   | N1   | C6   | 104.37(16) | C19  | C18  | C17  | 117.4(2)   |
| N2   | C12  | C13  | 118.27(15) | F1   | C19  | C18  | 118.8(3)   |
| N2   | C12  | C15  | 116.53(15) | F1   | C19  | C20  | 117.8(2)   |
| C15  | C12  | C13  | 89.13(14)  | C20  | C19  | C18  | 123.4(3)   |
| N2   | C8   | C7   | 113.68(15) | C11  | C10  | C9   | 125.3(3)   |
| N2   | C8   | C9   | 113.22(15) | C6   | C5   | C4   | 115.1(3)   |
| C7   | C8   | C9   | 109.26(16) | C19  | C20  | C21  | 117.1(2)   |
| O1   | C7   | C8   | 120.24(17) | C21  | C22  | C17  | 116.9(3)   |
| N1   | C7   | O1   | 115.08(16) | C3   | C2   | C1   | 116.6(3)   |
| N1   | C7   | C8   | 124.68(17) | C3   | C4   | C5   | 122.7(3)   |

|     |     |     |            |     |     |     |          |
|-----|-----|-----|------------|-----|-----|-----|----------|
| C14 | C13 | C12 | 87.16(14)  | C2  | C3  | C4  | 121.8(3) |
| C13 | C14 | S1  | 117.89(14) | F2  | C21 | C20 | 118.6(3) |
| C13 | C14 | C15 | 88.99(14)  | F2  | C21 | C22 | 118.2(3) |
| C15 | C14 | S1  | 116.49(14) | C20 | C21 | C22 | 123.2(3) |
| C12 | C15 | C14 | 86.93(14)  |     |     |     |          |

**Table 6 Hydrogen Atom Coordinates ( $\text{\AA}\times 10^4$ ) and Isotropic Displacement Parameters ( $\text{\AA}^2\times 10^3$ ) for drh12-99-11.**

| Atom | <i>x</i> | <i>y</i> | <i>z</i> | U(eq) |
|------|----------|----------|----------|-------|
| H12  | 3847     | 3107     | 4270     | 58    |
| H8   | 3880     | 4815     | 3730     | 60    |
| H13A | 5308     | 4032     | 2964     | 61    |
| H13B | 5533     | 3730     | 4445     | 61    |
| H14  | 5682     | 2464     | 3810     | 62    |
| H15A | 4080     | 2852     | 1571     | 66    |
| H15B | 3952     | 2207     | 2648     | 66    |
| H9A  | 1559     | 4975     | 3418     | 71    |
| H9B  | 2419     | 5637     | 3779     | 71    |
| H16A | 2072     | 3059     | 2163     | 93    |
| H16B | 1475     | 3831     | 2424     | 93    |
| H16C | 1896     | 3279     | 3592     | 93    |
| H18  | 7712     | 4131     | 2150     | 83    |
| H10  | 2889     | 5459     | 1550     | 92    |
| H5   | 1280     | 3681     | 7822     | 103   |
| H20  | 10238    | 3705     | 4989     | 103   |
| H22  | 7940     | 2071     | 3974     | 105   |
| H2   | 4956     | 4529     | 8691     | 108   |
| H4   | 2250     | 3742     | 9952     | 121   |
| H3   | 4024     | 4147     | 10354    | 122   |
| H11A | 637      | 5312     | 1284     | 128   |
| H11B | 1358     | 5530     | 147      | 128   |

### Crystal data of compound *trans*-**3o**

The crystal of *trans*-**3o** were obtained by leaving alone its solution in hexane and CHCl<sub>3</sub> at room temperature in the open air for seven days. The relative configuration of compound *trans*-**3o** were assigned by single crystal X-ray analysis. The crystal data of compound *trans*-**3o** have been deposited in CCDC with number 2069936.

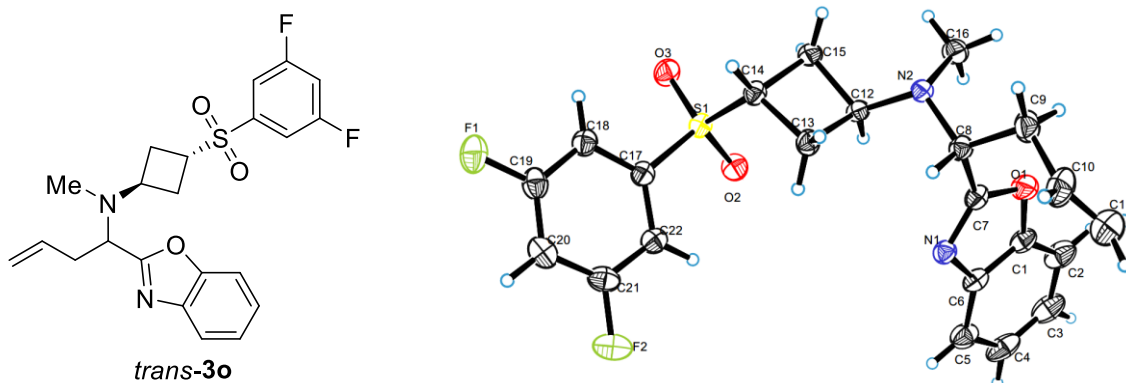

Molecular structure of *trans*-**3o** was obtained by single-crystal X-ray diffraction studies with the ellipsoid contour at 35% probability levels.

**Table 7 Crystal data and structure refinement for drh12-99-12.**

|                                    |                                                                                |
|------------------------------------|--------------------------------------------------------------------------------|
| Identification code                | drh12-99-12                                                                    |
| Empirical formula                  | C <sub>22</sub> H <sub>22</sub> F <sub>2</sub> N <sub>2</sub> O <sub>3</sub> S |
| Formula weight                     | 432.47                                                                         |
| Temperature/K                      | 291(2)                                                                         |
| Crystal system                     | orthorhombic                                                                   |
| Space group                        | P2 <sub>1</sub> 2 <sub>1</sub> 2 <sub>1</sub>                                  |
| a/Å                                | 10.36756(12)                                                                   |
| b/Å                                | 11.59613(14)                                                                   |
| c/Å                                | 17.36693(19)                                                                   |
| α/°                                | 90                                                                             |
| β/°                                | 90                                                                             |
| γ/°                                | 90                                                                             |
| Volume/Å <sup>3</sup>              | 2087.91(4)                                                                     |
| Z                                  | 4                                                                              |
| ρ <sub>calc</sub> /cm <sup>3</sup> | 1.376                                                                          |
| μ/mm <sup>-1</sup>                 | 1.766                                                                          |
| F(000)                             | 904.0                                                                          |
| Crystal size/mm <sup>3</sup>       | 0.22 × 0.17 × 0.16                                                             |
| Radiation                          | CuKα (λ = 1.54184)                                                             |
| 2θ range for data collection/°     | 9.17 to 139.646                                                                |
| Index ranges                       | -12 ≤ h ≤ 10, -13 ≤ k ≤ 12, -21 ≤ l ≤ 15                                       |

|                                                |                                                                  |
|------------------------------------------------|------------------------------------------------------------------|
| Reflections collected                          | 7580                                                             |
| Independent reflections                        | 3856 [ $R_{\text{int}} = 0.0190$ , $R_{\text{sigma}} = 0.0224$ ] |
| Data/restraints/parameters                     | 3856/1/273                                                       |
| Goodness-of-fit on $F^2$                       | 1.089                                                            |
| Final R indexes [ $I \geq 2\sigma(I)$ ]        | $R_1 = 0.0361$ , $wR_2 = 0.0996$                                 |
| Final R indexes [all data]                     | $R_1 = 0.0367$ , $wR_2 = 0.1003$                                 |
| Largest diff. peak/hole / $e \text{ \AA}^{-3}$ | 0.25/-0.21                                                       |
| Flack parameter                                | 0.027(7)                                                         |

**Table 8 Fractional Atomic Coordinates ( $\times 10^4$ ) and Equivalent Isotropic Displacement Parameters ( $\text{\AA}^2 \times 10^3$ ) for drh12-99-12.  $U_{\text{eq}}$  is defined as 1/3 of the trace of the orthogonalised  $U_{\text{ij}}$  tensor.**

| Atom | $x$       | $y$        | $z$        | $U(\text{eq})$ |
|------|-----------|------------|------------|----------------|
| S1   | 3904.7(6) | 7881.7(5)  | 4943.3(3)  | 42.58(19)      |
| O2   | 5208(2)   | 8253.1(19) | 5077.6(13) | 57.3(5)        |
| F2   | 6134(2)   | 4090.2(19) | 4353.5(14) | 79.0(6)        |
| N2   | 3815(2)   | 8458.8(19) | 7659.4(12) | 39.6(5)        |
| F1   | 2076(2)   | 4737(2)    | 3254.5(13) | 78.0(6)        |
| O3   | 3085(2)   | 8585.7(18) | 4471.2(12) | 56.3(5)        |
| N1   | 6910(2)   | 7495.1(19) | 7686.4(13) | 43.0(5)        |
| O1   | 6550(2)   | 8944(2)    | 8504.9(14) | 61.2(6)        |
| C8   | 4667(2)   | 7745(2)    | 8136.6(14) | 42.2(6)        |
| C7   | 6068(3)   | 8066(2)    | 8100.6(15) | 46.5(6)        |
| C15  | 3074(3)   | 8834(2)    | 6298.7(16) | 45.7(6)        |
| C12  | 4111(2)   | 8350(2)    | 6841.3(14) | 39.0(5)        |
| C18  | 2939(3)   | 6143(3)    | 4073.7(16) | 48.3(6)        |
| C1   | 7855(3)   | 8941(3)    | 8335.7(19) | 54.0(7)        |
| C6   | 8087(3)   | 8046(2)    | 7835.3(17) | 48.1(6)        |
| C13  | 3923(3)   | 7138(2)    | 6486.5(14) | 46.3(6)        |
| C19  | 3045(3)   | 5077(3)    | 3720.0(17) | 55.0(7)        |
| C17  | 3971(3)   | 6485(2)    | 4528.7(14) | 43.3(6)        |
| C21  | 5077(3)   | 4762(3)    | 4270.4(19) | 55.5(7)        |
| C14  | 3113(3)   | 7694(2)    | 5835.4(15) | 42.4(6)        |
| C22  | 5050(3)   | 5811(3)    | 4643.4(17) | 48.9(6)        |
| C20  | 4088(4)   | 4374(3)    | 3804.0(18) | 58.7(8)        |
| C16  | 3781(3)   | 9683(2)    | 7873.1(19) | 55.5(7)        |
| C5   | 9315(3)   | 7810(4)    | 7571(2)    | 64.9(9)        |
| C9   | 4227(3)   | 7697(3)    | 8979.5(17) | 62.3(8)        |
| C2   | 8829(4)   | 9658(3)    | 8603(3)    | 77.5(11)       |



|     |          |         |         |           |
|-----|----------|---------|---------|-----------|
| C10 | 4905(5)  | 6727(4) | 9415(2) | 83.3(12)  |
| C4  | 10283(3) | 8529(4) | 7846(3) | 79.2(13)  |
| C3  | 10044(4) | 9429(4) | 8342(3) | 82.0(12)  |
| C11 | 5898(6)  | 6788(5) | 9829(3) | 104.0(16) |

**Table 9 Anisotropic Displacement Parameters ( $\text{\AA}^2 \times 10^3$ ) for drh12-99-12. The Anisotropic displacement factor exponent takes the form:  $-2\pi^2[h^2a^*^2U_{11}+2hka^*b^*U_{12}+\dots]$ .**

| Atom | U <sub>11</sub> | U <sub>22</sub> | U <sub>33</sub> | U <sub>23</sub> | U <sub>13</sub> | U <sub>12</sub> |
|------|-----------------|-----------------|-----------------|-----------------|-----------------|-----------------|
| S1   | 40.9(3)         | 46.3(3)         | 40.5(3)         | 3.4(2)          | -0.2(2)         | -4.6(3)         |
| O2   | 45.4(11)        | 61.1(12)        | 65.4(12)        | -5.0(10)        | 3.9(9)          | -15.1(9)        |
| F2   | 67.8(13)        | 65.2(11)        | 104.1(16)       | 9.0(11)         | 15.3(12)        | 17.8(11)        |
| N2   | 36.5(11)        | 41.4(11)        | 40.9(10)        | -3.6(8)         | -2.6(9)         | 1.4(9)          |
| F1   | 80.7(14)        | 77.9(13)        | 75.5(13)        | -16.0(11)       | -14.4(11)       | -23.1(12)       |
| O3   | 67.6(14)        | 53.6(11)        | 47.9(10)        | 10.7(9)         | -6.8(10)        | 5.4(10)         |
| N1   | 37.8(11)        | 47.1(11)        | 44.1(11)        | -0.2(9)         | -2.7(8)         | -2.0(9)         |
| O1   | 47.3(12)        | 64.2(13)        | 72.0(13)        | -14.9(11)       | -11.9(10)       | 0.8(10)         |
| C8   | 38.9(13)        | 45.6(14)        | 42.2(13)        | -0.6(11)        | -2.2(10)        | -3.9(11)        |
| C7   | 39.8(13)        | 53.2(14)        | 46.3(13)        | 3.4(11)         | -7.3(10)        | -3.3(11)        |
| C15  | 47.1(15)        | 45.2(14)        | 44.8(13)        | 3.0(10)         | -2.5(12)        | 9.6(12)         |
| C12  | 36.1(13)        | 38.0(12)        | 42.9(12)        | 1.2(10)         | -3.5(10)        | 2.2(10)         |
| C18  | 43.6(14)        | 56.5(16)        | 45.0(13)        | -0.1(12)        | 0.9(11)         | -5.3(12)        |
| C1   | 41.9(15)        | 53.2(16)        | 66.8(18)        | 5.1(14)         | -15.3(13)       | -6.1(13)        |
| C6   | 38.9(13)        | 52.4(15)        | 52.8(15)        | 11.9(12)        | -7.5(11)        | -1.6(12)        |
| C13  | 58.8(16)        | 40.2(12)        | 39.9(12)        | 1.0(10)         | -6.1(11)        | 4.6(13)         |
| C19  | 56.2(18)        | 60.0(17)        | 48.7(15)        | -5.4(13)        | 3.4(13)         | -14.9(15)       |
| C17  | 40.9(14)        | 50.5(13)        | 38.4(11)        | 3.5(10)         | 3.8(11)         | -3.9(12)        |
| C21  | 51.6(16)        | 51.6(16)        | 63.3(17)        | 9.4(14)         | 15.4(14)        | 5.3(14)         |
| C14  | 38.6(12)        | 47.5(14)        | 41.2(12)        | 0.8(10)         | -2.7(10)        | -3.7(11)        |
| C22  | 42.7(14)        | 55.7(16)        | 48.3(14)        | 6.6(12)         | 4.1(11)         | -2.4(13)        |
| C20  | 70(2)           | 49.4(15)        | 56.8(16)        | -1.7(12)        | 15.5(15)        | -8.8(15)        |
| C16  | 56.1(17)        | 45.5(14)        | 65.0(17)        | -13.7(12)       | -7.2(15)        | 3.6(13)         |
| C5   | 51.3(17)        | 82(2)           | 61.3(17)        | 18.2(17)        | 3.8(14)         | 6.2(17)         |
| C9   | 59.6(18)        | 86(2)           | 41.9(14)        | 0.0(15)         | 3.3(13)         | -4.5(17)        |
| C2   | 62(2)           | 63(2)           | 108(3)          | -0.3(19)        | -32(2)          | -11.0(18)       |
| C10  | 90(3)           | 107(3)          | 52.1(18)        | 19(2)           | -9.9(19)        | -9(3)           |
| C4   | 38.9(17)        | 107(3)          | 92(3)           | 49(3)           | -5.9(16)        | -7.0(18)        |
| C3   | 54(2)           | 81(3)           | 110(3)          | 23(3)           | -26(2)          | -16.6(19)       |
| C11  | 118(4)          | 115(4)          | 79(3)           | 4(3)            | -13(3)          | 31(3)           |

**Table 10 Bond Lengths for drh12-99-12.**

| Atom | Atom | Length/Å | Atom | Atom | Length/Å |
|------|------|----------|------|------|----------|
| S1   | O2   | 1.437(2) | C12  | C13  | 1.547(3) |
| S1   | O3   | 1.436(2) | C18  | C19  | 1.384(5) |
| S1   | C17  | 1.773(3) | C18  | C17  | 1.388(4) |
| S1   | C14  | 1.767(3) | C1   | C6   | 1.375(5) |
| F2   | C21  | 1.352(4) | C1   | C2   | 1.388(5) |
| N2   | C8   | 1.468(3) | C6   | C5   | 1.381(4) |
| N2   | C12  | 1.459(3) | C13  | C14  | 1.549(3) |
| N2   | C16  | 1.468(3) | C19  | C20  | 1.362(5) |
| F1   | C19  | 1.349(4) | C17  | C22  | 1.380(4) |
| N1   | C7   | 1.311(4) | C21  | C22  | 1.378(5) |
| N1   | C6   | 1.401(3) | C21  | C20  | 1.382(5) |
| O1   | C7   | 1.334(3) | C5   | C4   | 1.389(6) |
| O1   | C1   | 1.384(4) | C9   | C10  | 1.527(6) |
| C8   | C7   | 1.500(4) | C2   | C3   | 1.364(7) |
| C8   | C9   | 1.534(4) | C10  | C11  | 1.257(7) |
| C15  | C12  | 1.536(3) | C4   | C3   | 1.376(7) |
| C15  | C14  | 1.548(4) |      |      |          |

**Table 11 Bond Angles for drh12-99-12.**

| Atom | Atom | Atom | Angle/°    | Atom | Atom | Atom | Angle/°    |
|------|------|------|------------|------|------|------|------------|
| O2   | S1   | C17  | 107.65(13) | C1   | C6   | N1   | 108.0(2)   |
| O2   | S1   | C14  | 109.35(13) | C1   | C6   | C5   | 121.4(3)   |
| O3   | S1   | O2   | 118.61(14) | C5   | C6   | N1   | 130.6(3)   |
| O3   | S1   | C17  | 108.07(13) | C12  | C13  | C14  | 88.91(19)  |
| O3   | S1   | C14  | 107.22(13) | F1   | C19  | C18  | 117.9(3)   |
| C14  | S1   | C17  | 105.15(12) | F1   | C19  | C20  | 118.7(3)   |
| C8   | N2   | C16  | 114.7(2)   | C20  | C19  | C18  | 123.4(3)   |
| C12  | N2   | C8   | 112.0(2)   | C18  | C17  | S1   | 117.6(2)   |
| C12  | N2   | C16  | 109.6(2)   | C22  | C17  | S1   | 119.4(2)   |
| C7   | N1   | C6   | 104.4(2)   | C22  | C17  | C18  | 123.0(3)   |
| C7   | O1   | C1   | 104.6(2)   | F2   | C21  | C22  | 118.4(3)   |
| N2   | C8   | C7   | 114.8(2)   | F2   | C21  | C20  | 118.4(3)   |
| N2   | C8   | C9   | 112.3(2)   | C22  | C21  | C20  | 123.2(3)   |
| C7   | C8   | C9   | 109.7(2)   | C15  | C14  | S1   | 111.25(19) |
| N1   | C7   | O1   | 115.1(2)   | C15  | C14  | C13  | 89.43(19)  |
| N1   | C7   | C8   | 122.9(2)   | C13  | C14  | S1   | 116.08(19) |
| O1   | C7   | C8   | 122.0(3)   | C21  | C22  | C17  | 116.7(3)   |

|     |     |     |           |     |     |     |          |
|-----|-----|-----|-----------|-----|-----|-----|----------|
| C12 | C15 | C14 | 89.34(19) | C19 | C20 | C21 | 117.2(3) |
| N2  | C12 | C15 | 114.8(2)  | C6  | C5  | C4  | 115.7(4) |
| N2  | C12 | C13 | 116.1(2)  | C10 | C9  | C8  | 111.3(3) |
| C15 | C12 | C13 | 89.98(19) | C3  | C2  | C1  | 116.4(4) |
| C19 | C18 | C17 | 116.5(3)  | C11 | C10 | C9  | 128.2(5) |
| O1  | C1  | C2  | 129.7(3)  | C3  | C4  | C5  | 122.7(4) |
| C6  | C1  | O1  | 107.9(2)  | C2  | C3  | C4  | 121.4(4) |
| C6  | C1  | C2  | 122.4(3)  |     |     |     |          |

**Table 12 Hydrogen Atom Coordinates ( $\text{\AA}\times 10^4$ ) and Isotropic Displacement Parameters ( $\text{\AA}^2\times 10^3$ ) for drh12-99-12.**

| Atom | <i>x</i> | <i>y</i> | <i>z</i> | U(eq) |
|------|----------|----------|----------|-------|
| H8   | 4602     | 6957     | 7937     | 51    |
| H15A | 3354     | 9502     | 6007     | 55    |
| H15B | 2253     | 8979     | 6548     | 55    |
| H12  | 4965     | 8664     | 6721     | 47    |
| H18  | 2214     | 6605     | 4010     | 58    |
| H13A | 3438     | 6613     | 6811     | 56    |
| H13B | 4717     | 6785     | 6309     | 56    |
| H14  | 2260     | 7339     | 5780     | 51    |
| H22  | 5726     | 6052     | 4957     | 59    |
| H20  | 4132     | 3662     | 3558     | 70    |
| H16A | 3518     | 9756     | 8401     | 83    |
| H16B | 3179     | 10082    | 7548     | 83    |
| H16C | 4625     | 10012    | 7810     | 83    |
| H5   | 9483     | 7209     | 7231     | 78    |
| H9A  | 4414     | 8428     | 9227     | 75    |
| H9B  | 3302     | 7576     | 8998     | 75    |
| H2   | 8663     | 10262    | 8941     | 93    |
| H10  | 4536     | 5999     | 9370     | 100   |
| H4   | 11127    | 8397     | 7687     | 95    |
| H3   | 10725    | 9892     | 8504     | 98    |
| H11A | 6312     | 7492     | 9897     | 125   |
| H11B | 6219     | 6128     | 10066    | 125   |

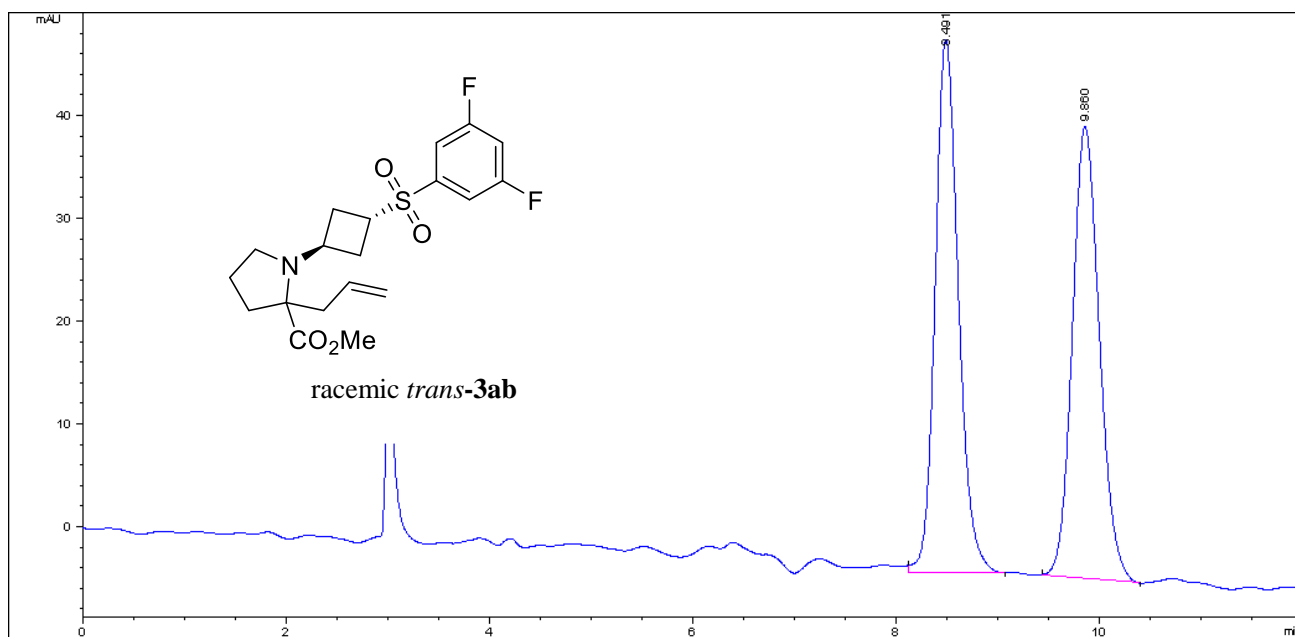

| Number | Time (min) | Area (mAU.s) | Height (mAU) | Width (min) | Symmetry factor | Area (%) |
|--------|------------|--------------|--------------|-------------|-----------------|----------|
| 1      | 8.491      | 827.2        | 51.9         | 0.2444      | 0.823           | 50.309   |
| 2      | 9.86       | 817          | 44           | 0.2879      | 0.846           | 49.691   |

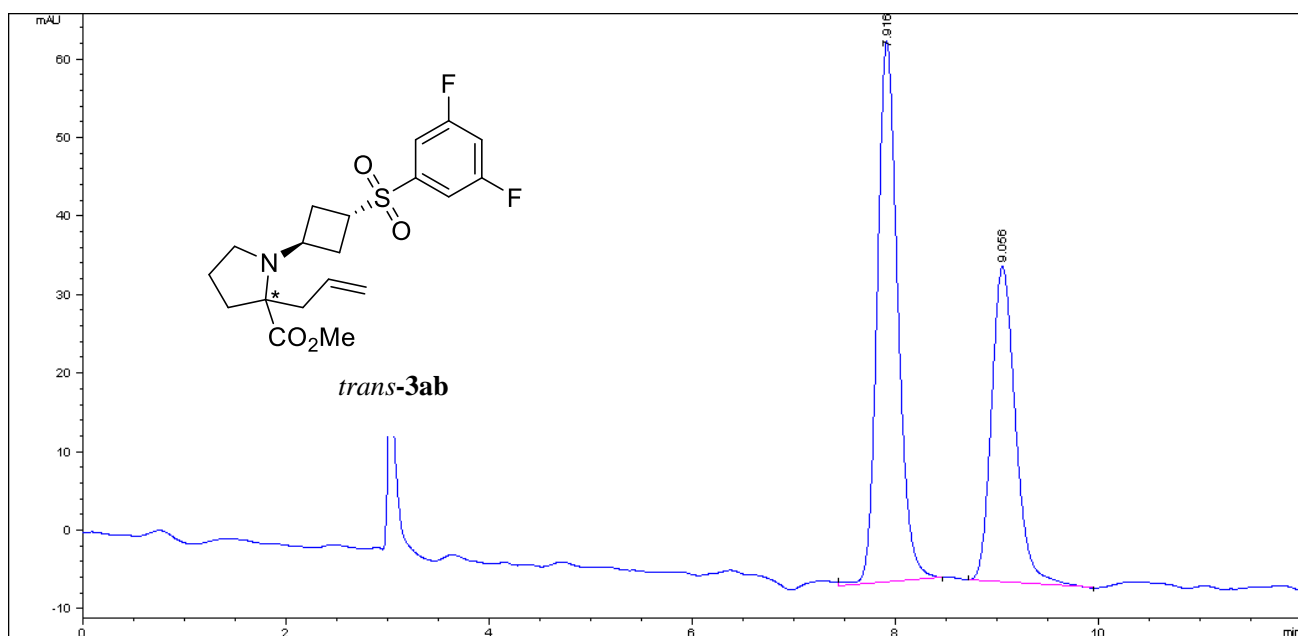

| Number | Time (min) | Area (mAU.s) | Height (mAU) | Width (min) | Symmetry factor | Area (%) |
|--------|------------|--------------|--------------|-------------|-----------------|----------|
| 1      | 7.916      | 971.8        | 69           | 0.2182      | 0.816           | 59.670   |
| 2      | 9.056      | 656.8        | 40.3         | 0.2515      | 0.786           | 40.330   |

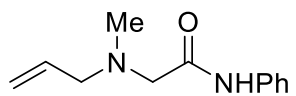

**1f**

$^1\text{H}$  NMR (400 MHz,  $\text{CDCl}_3$ )

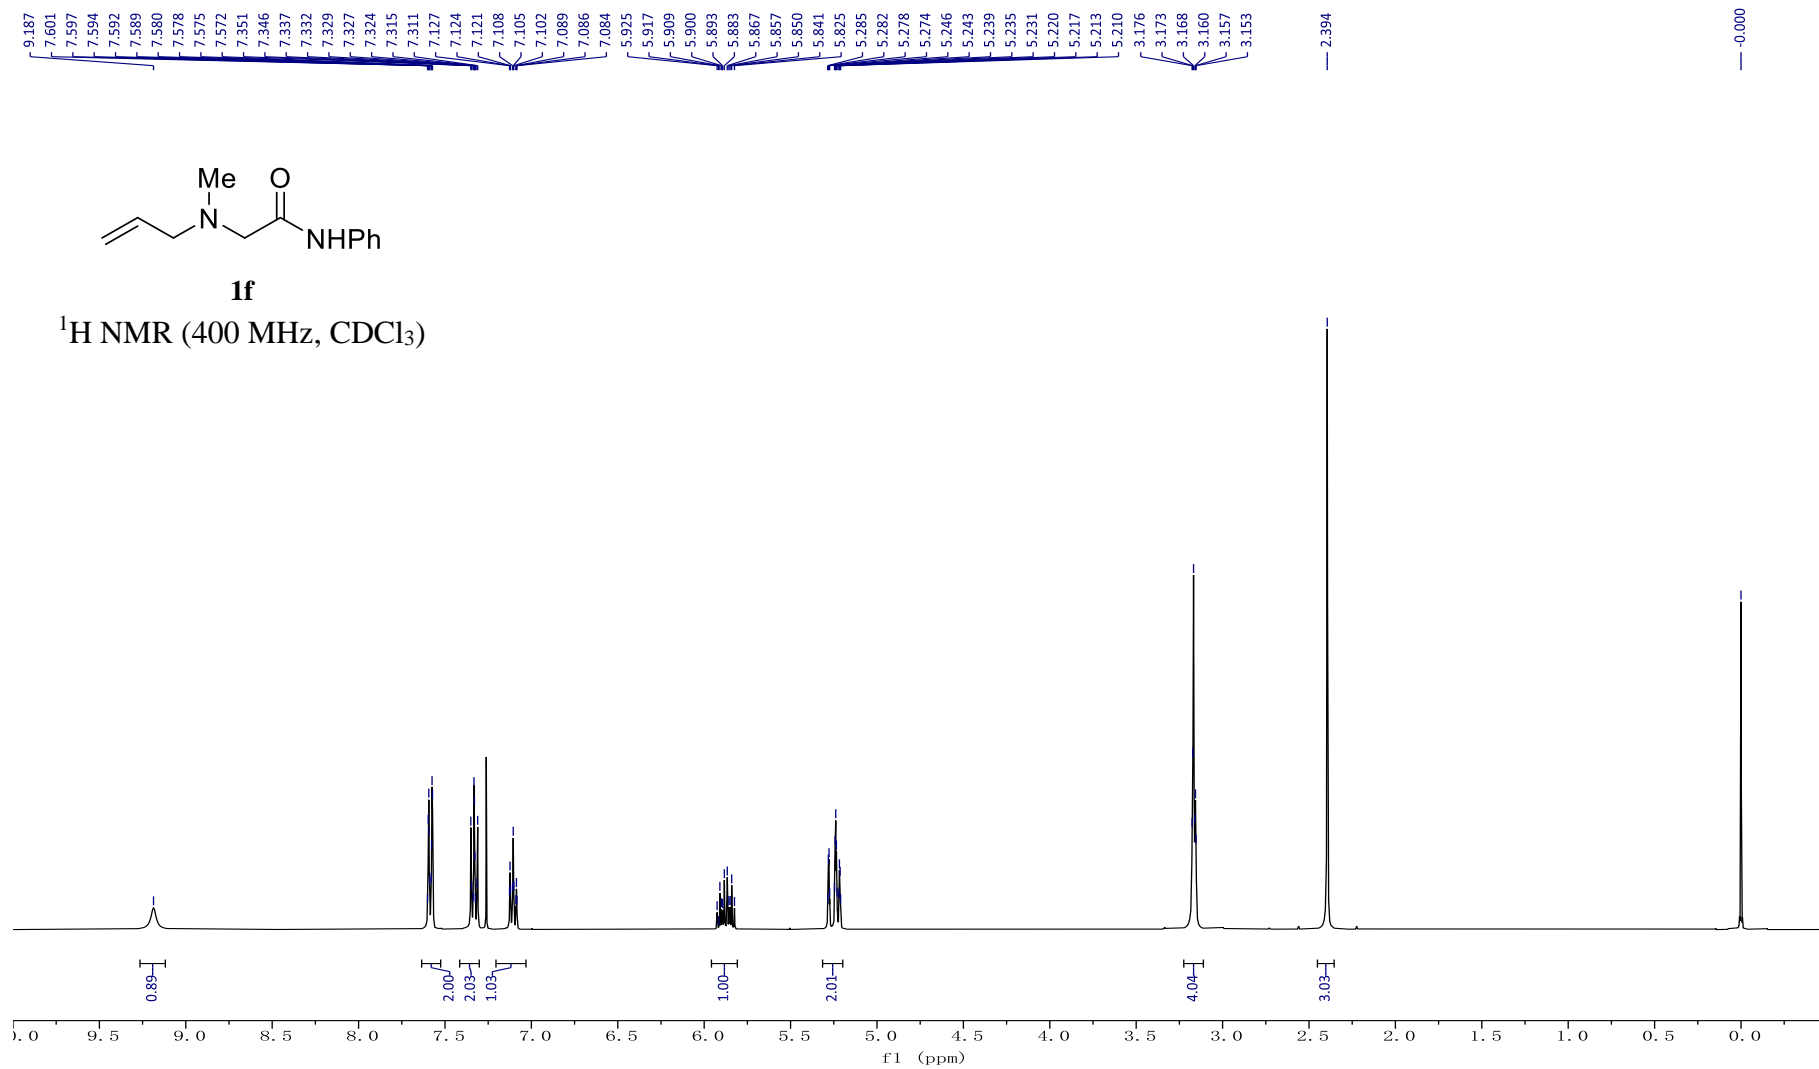

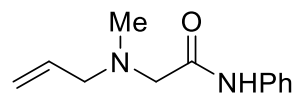

**1f**

$^{13}\text{C}$  NMR (100 MHz,  $\text{CDCl}_3$ )

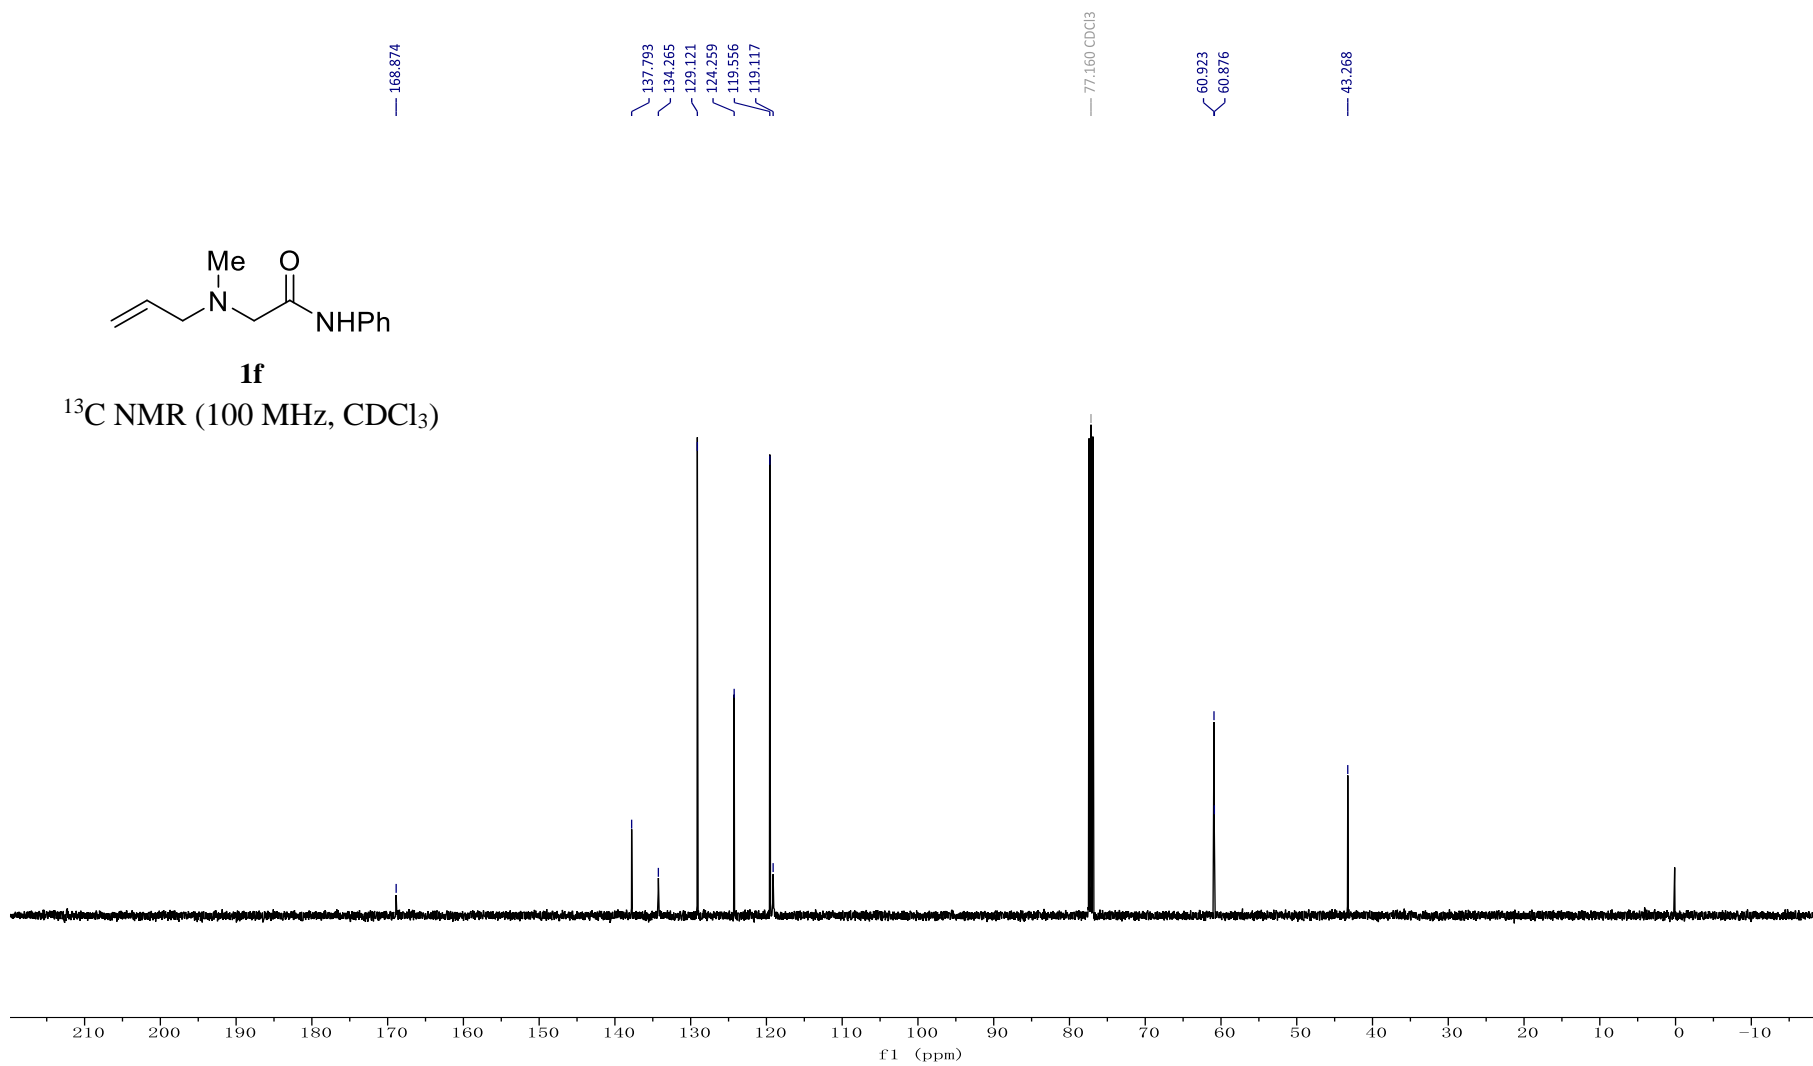

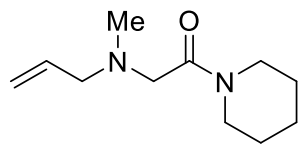

**1g**

<sup>1</sup>H NMR (500 MHz, CDCl<sub>3</sub>)

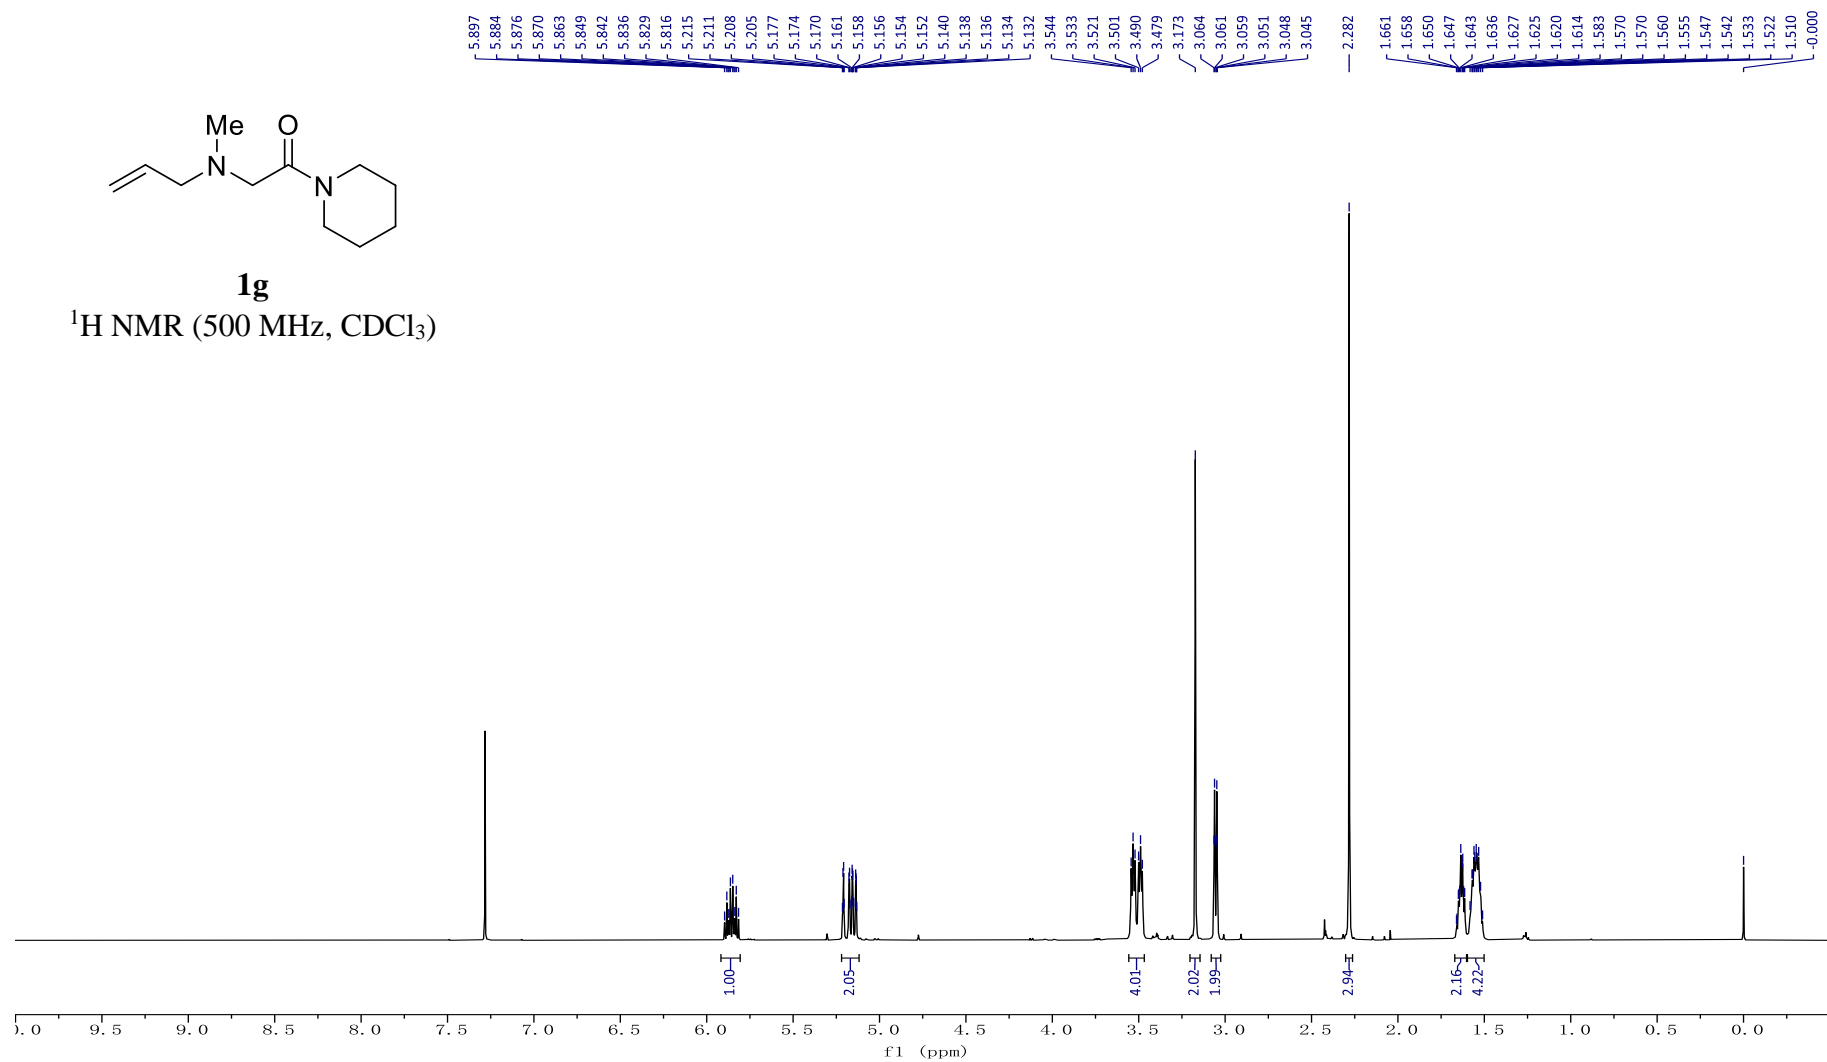

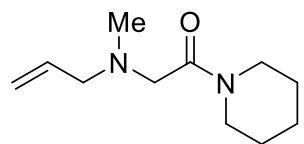

**1g**

<sup>13</sup>C NMR (125 MHz, CDCl<sub>3</sub>)

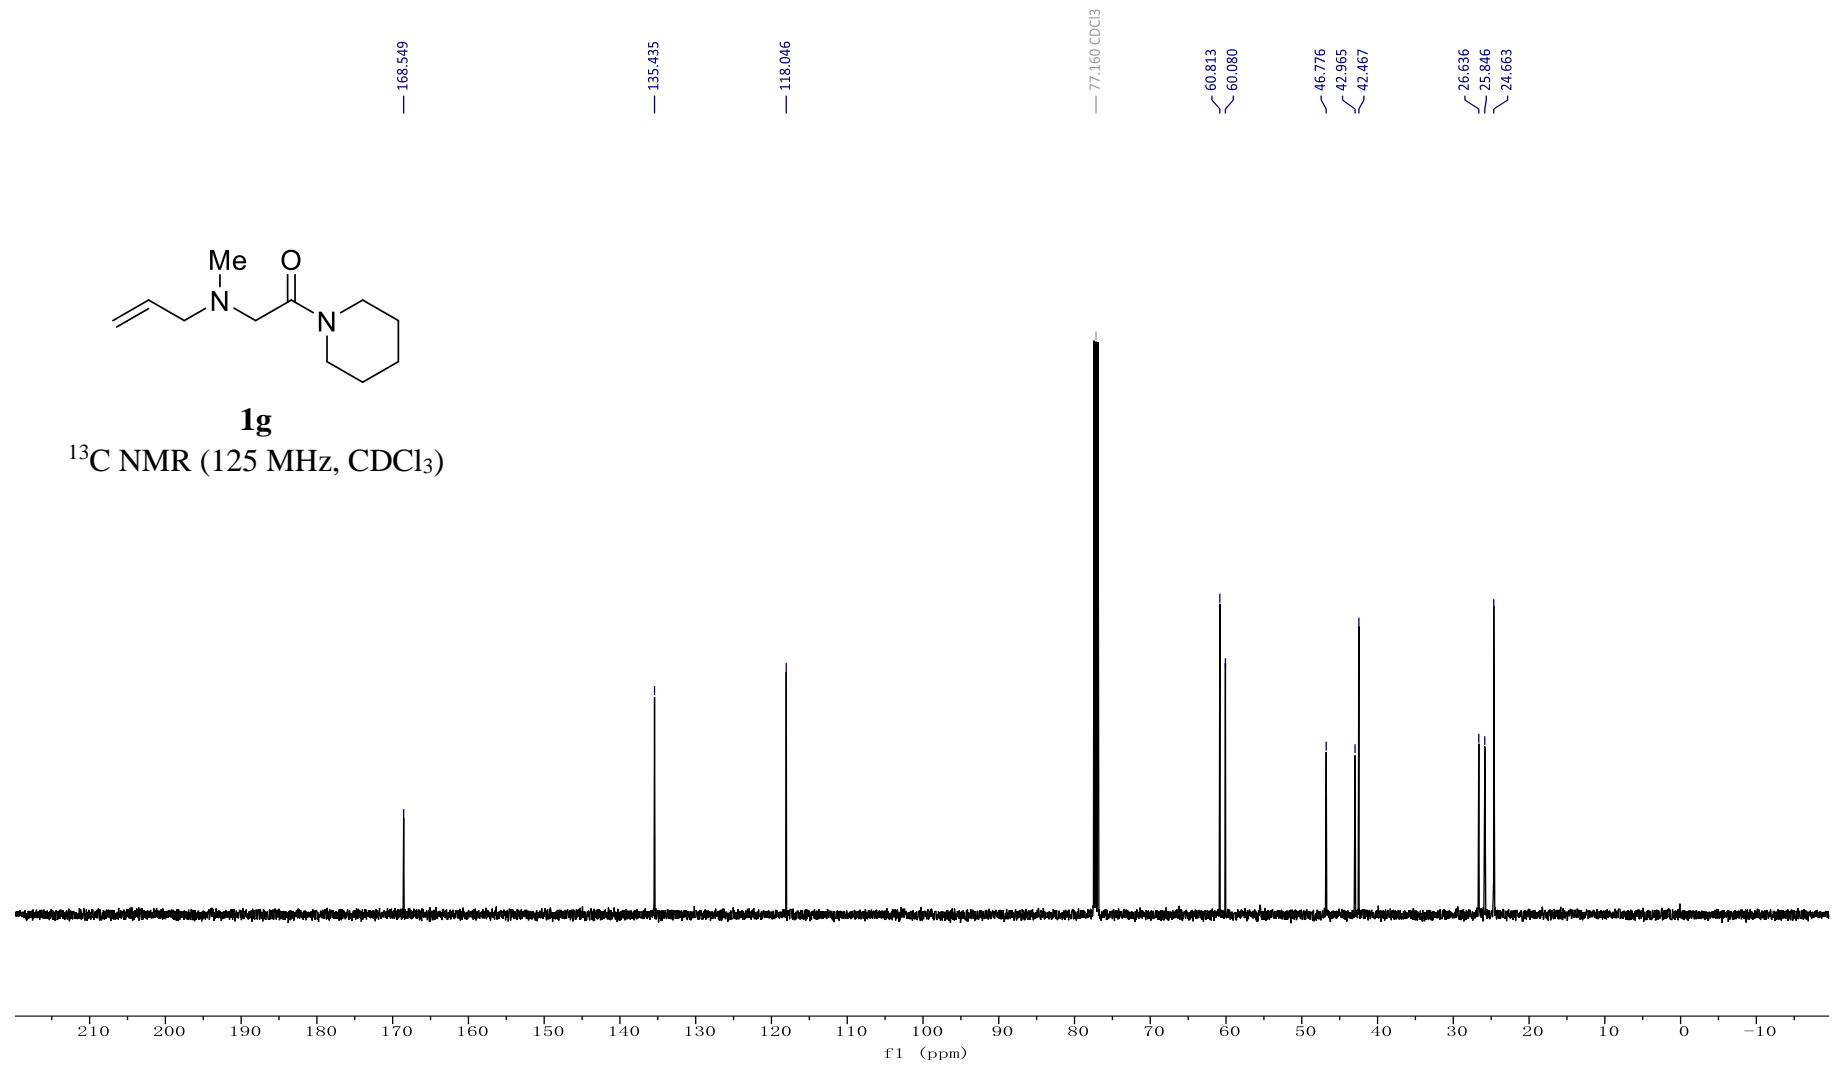



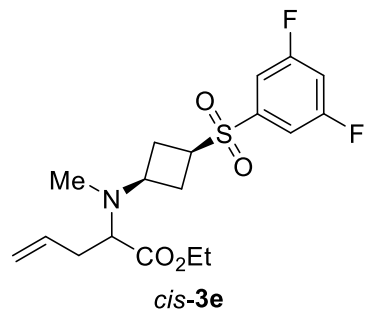

$^1\text{H NMR}$  (400 MHz,  $\text{CDCl}_3$ )

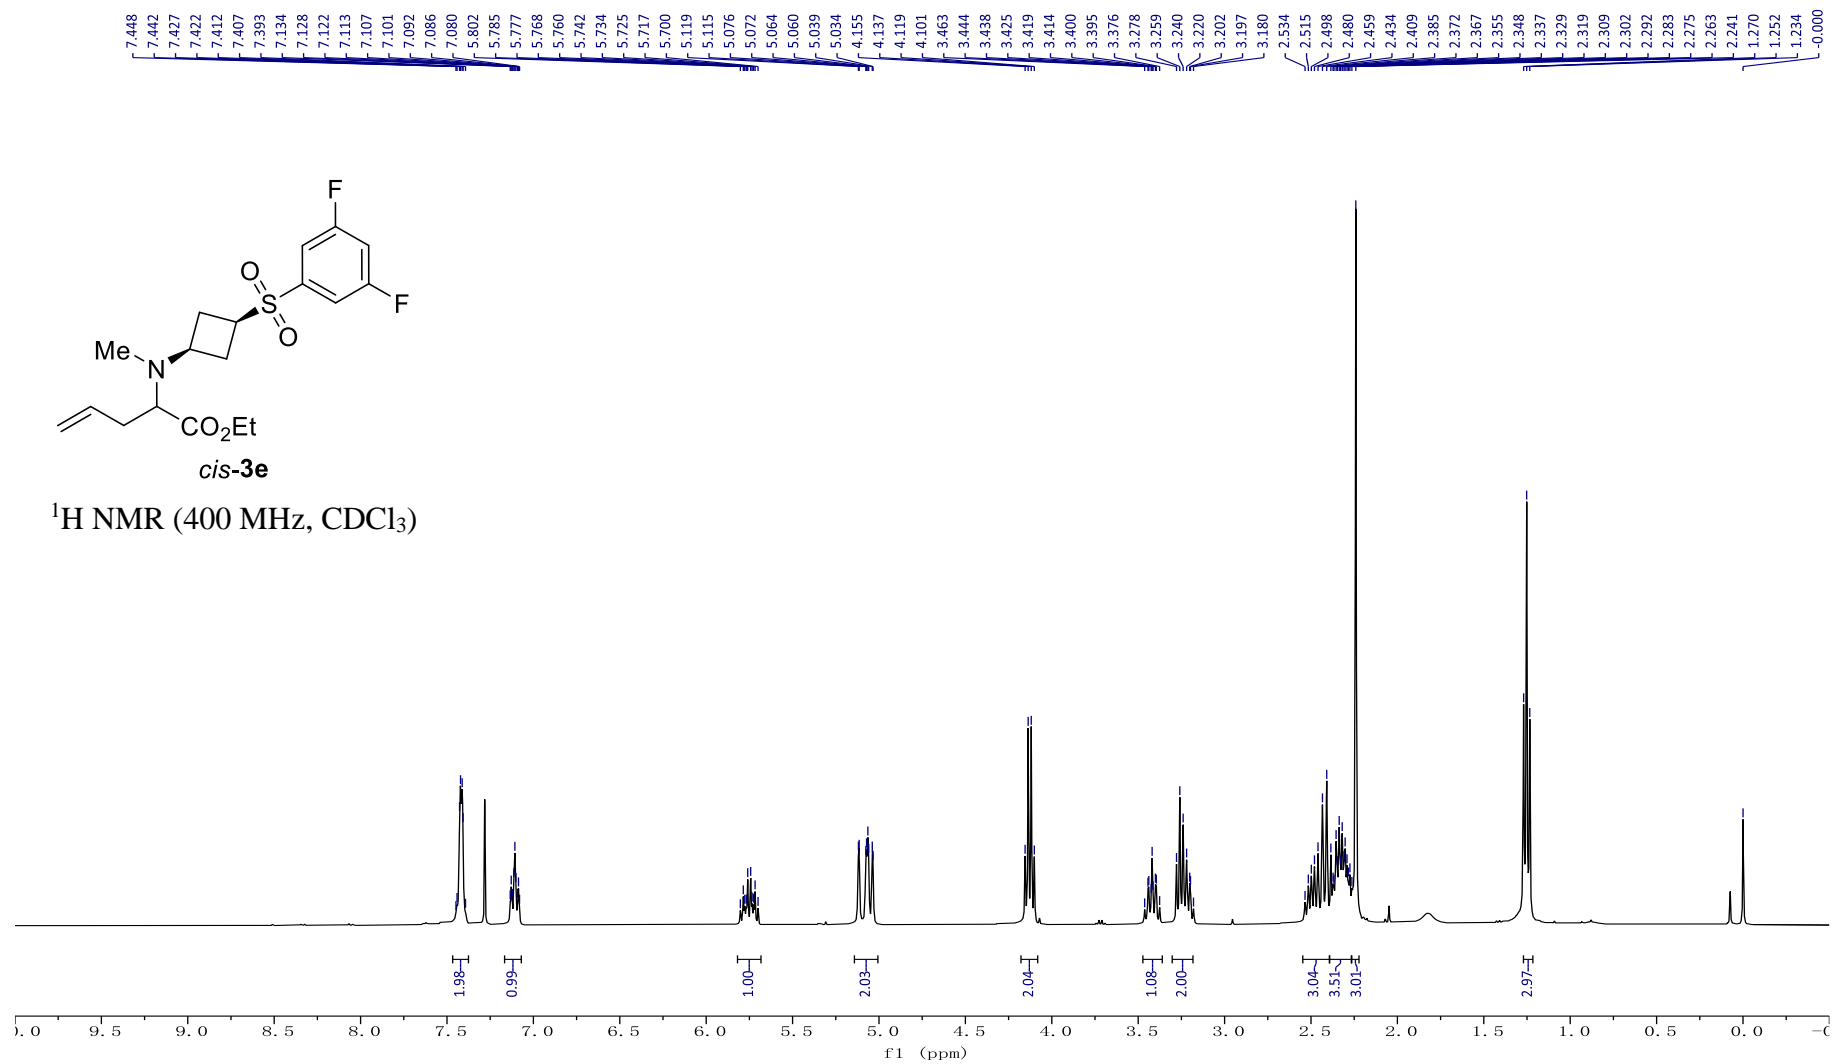

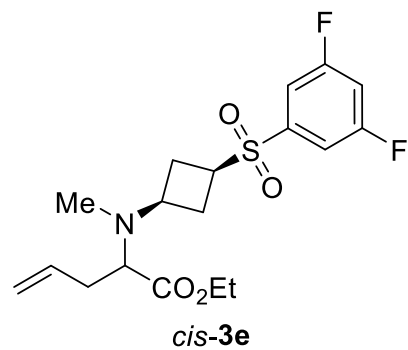

$^{13}\text{C}$  NMR (100 MHz,  $\text{CDCl}_3$ )

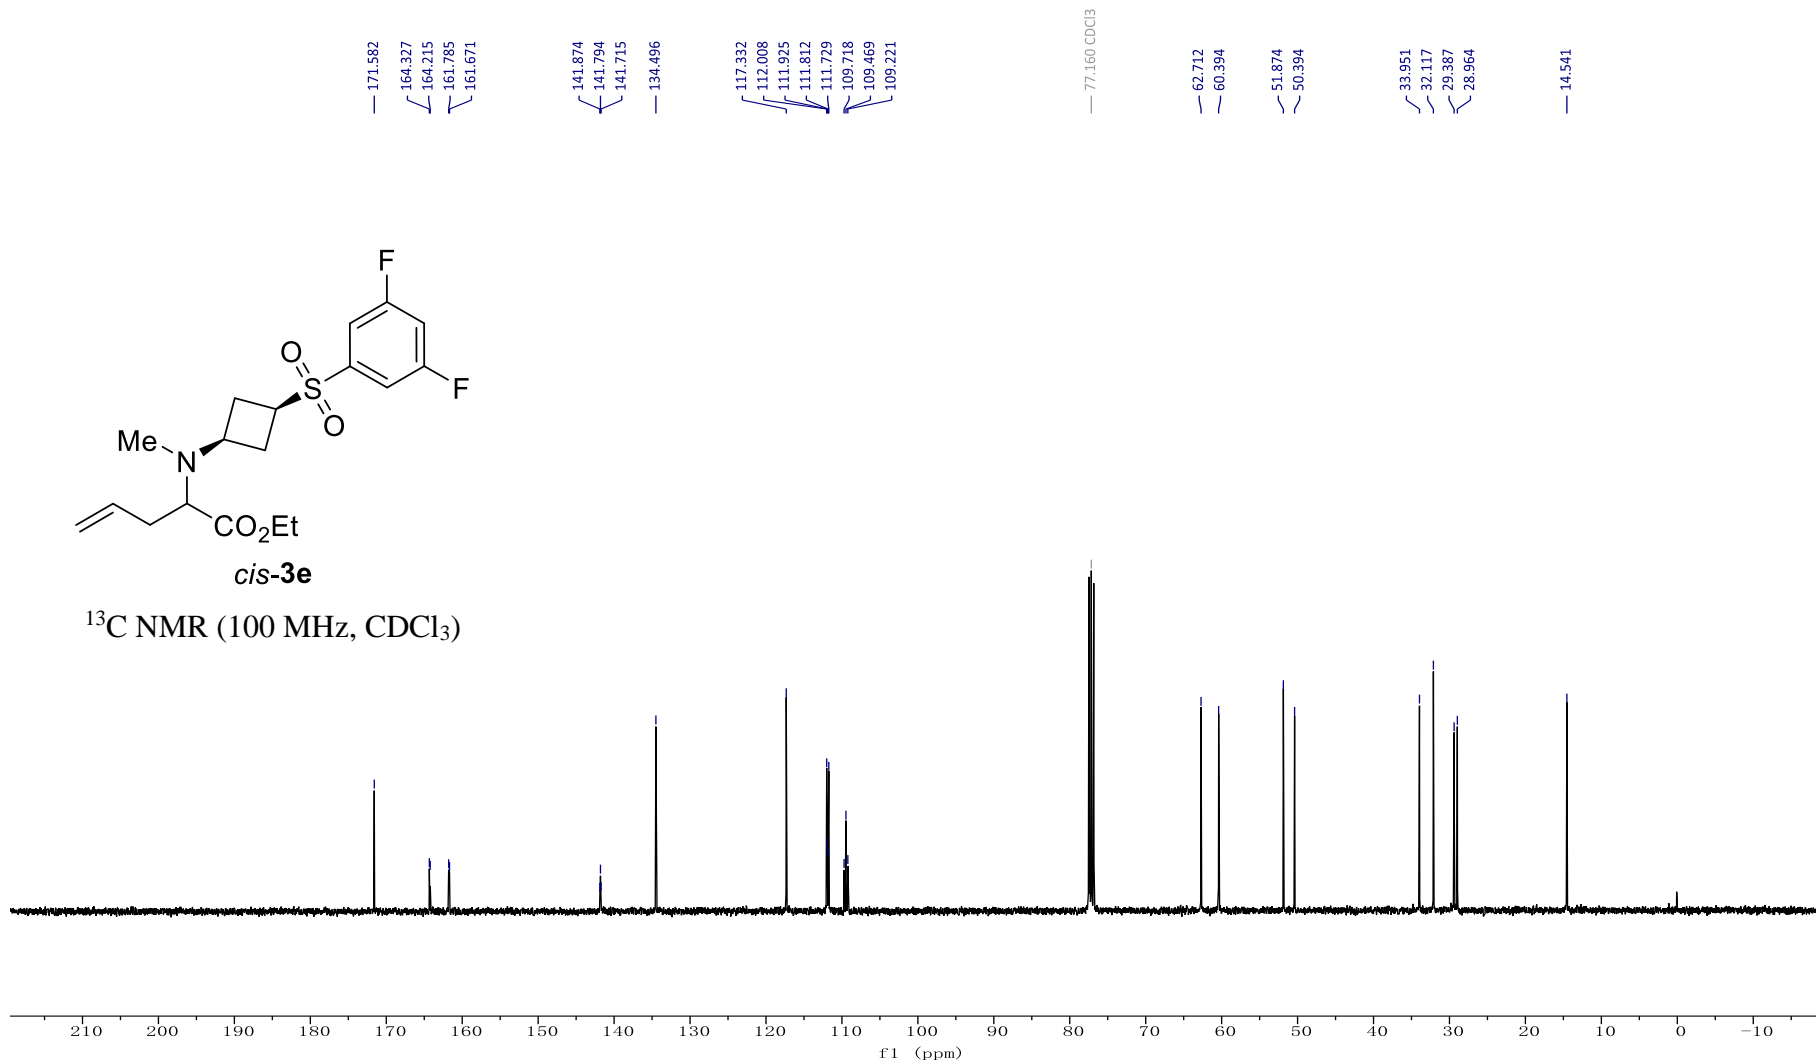

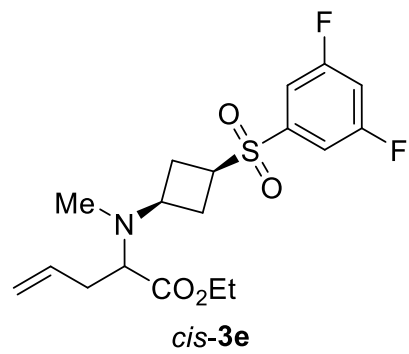

$^{19}\text{F}$  NMR (376 MHz,  $\text{CDCl}_3$ )

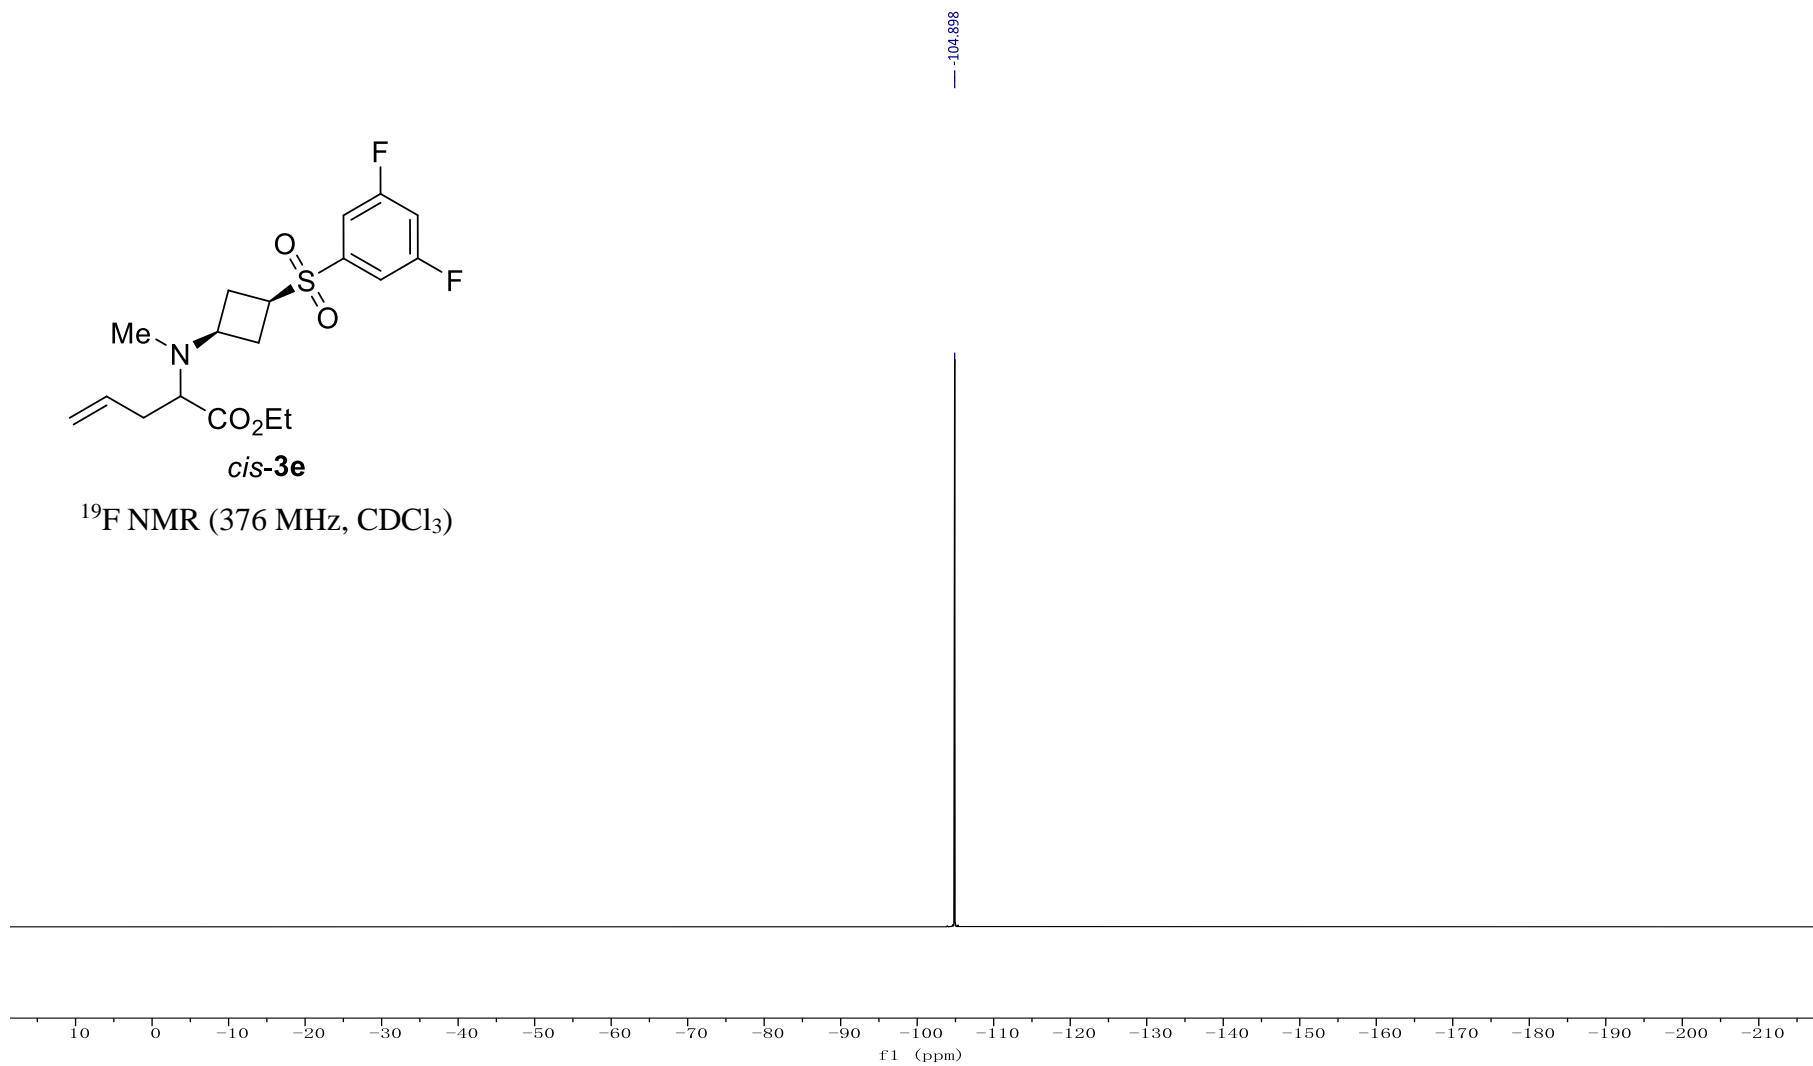

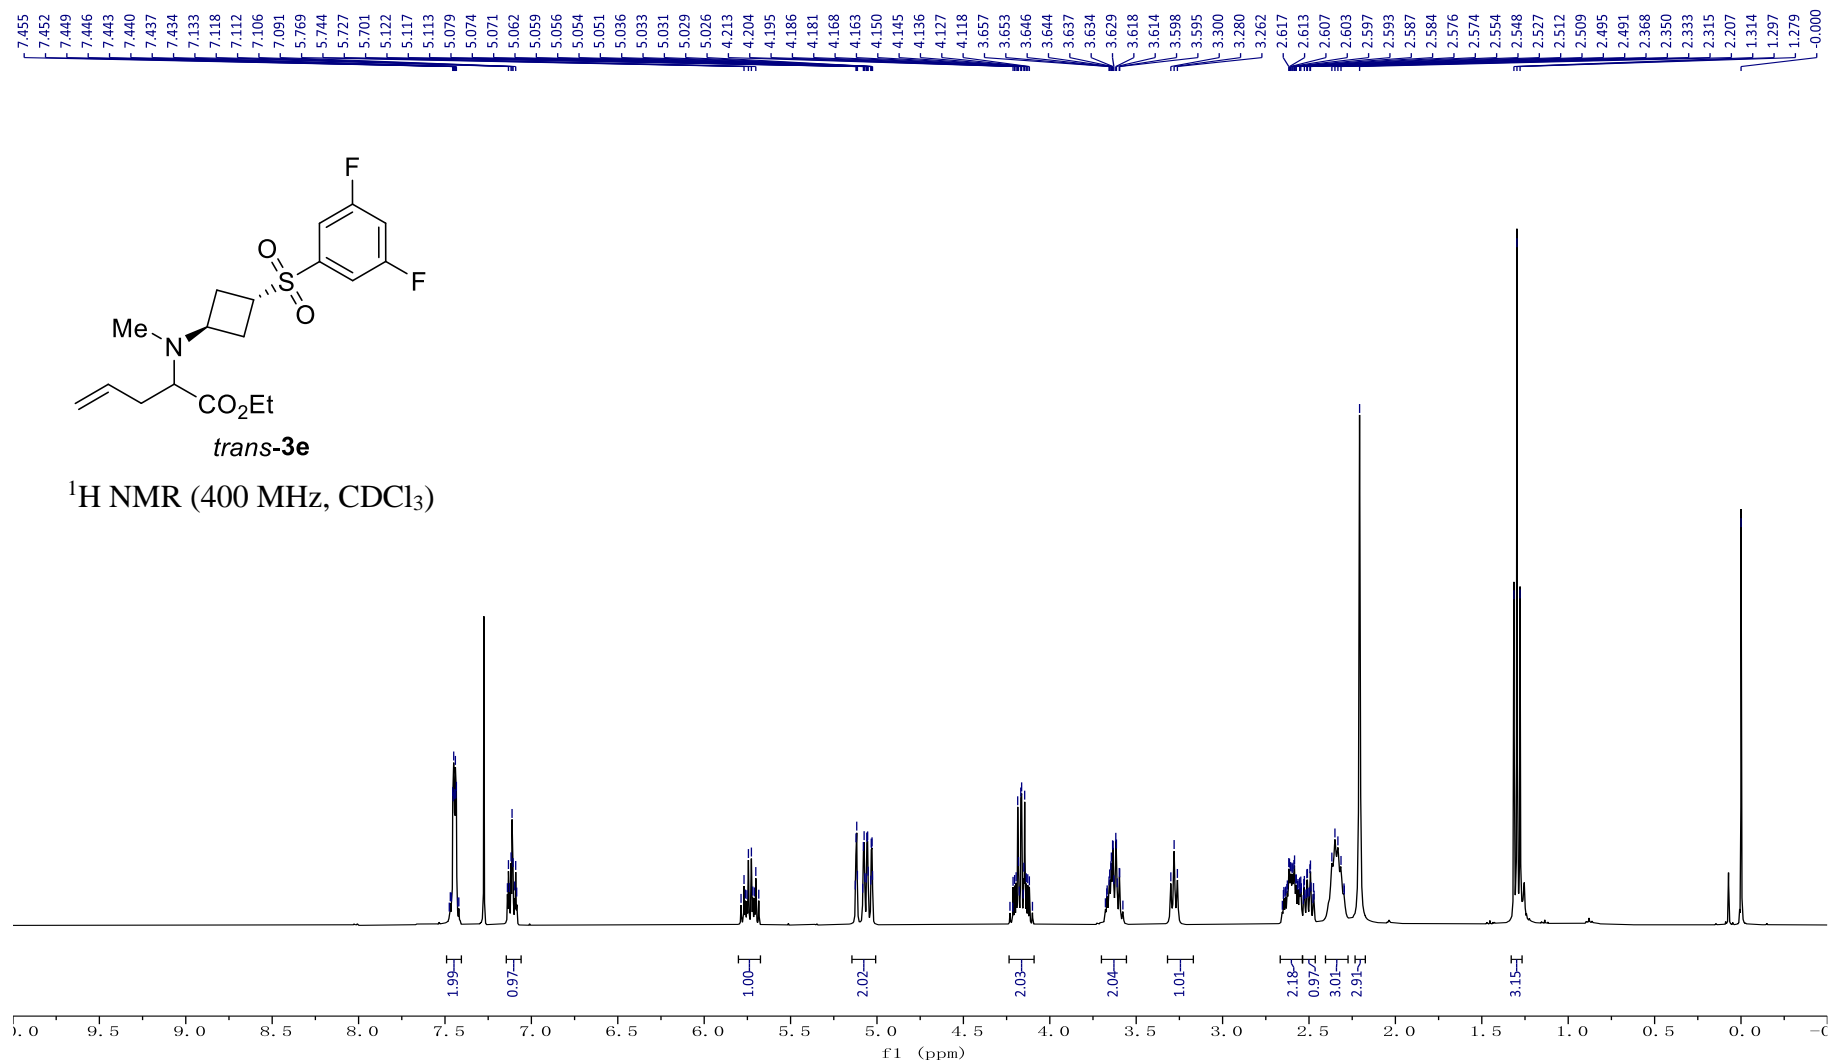

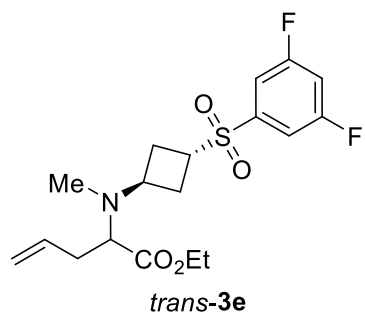

$^{13}\text{C}$  NMR (100 MHz,  $\text{CDCl}_3$ )

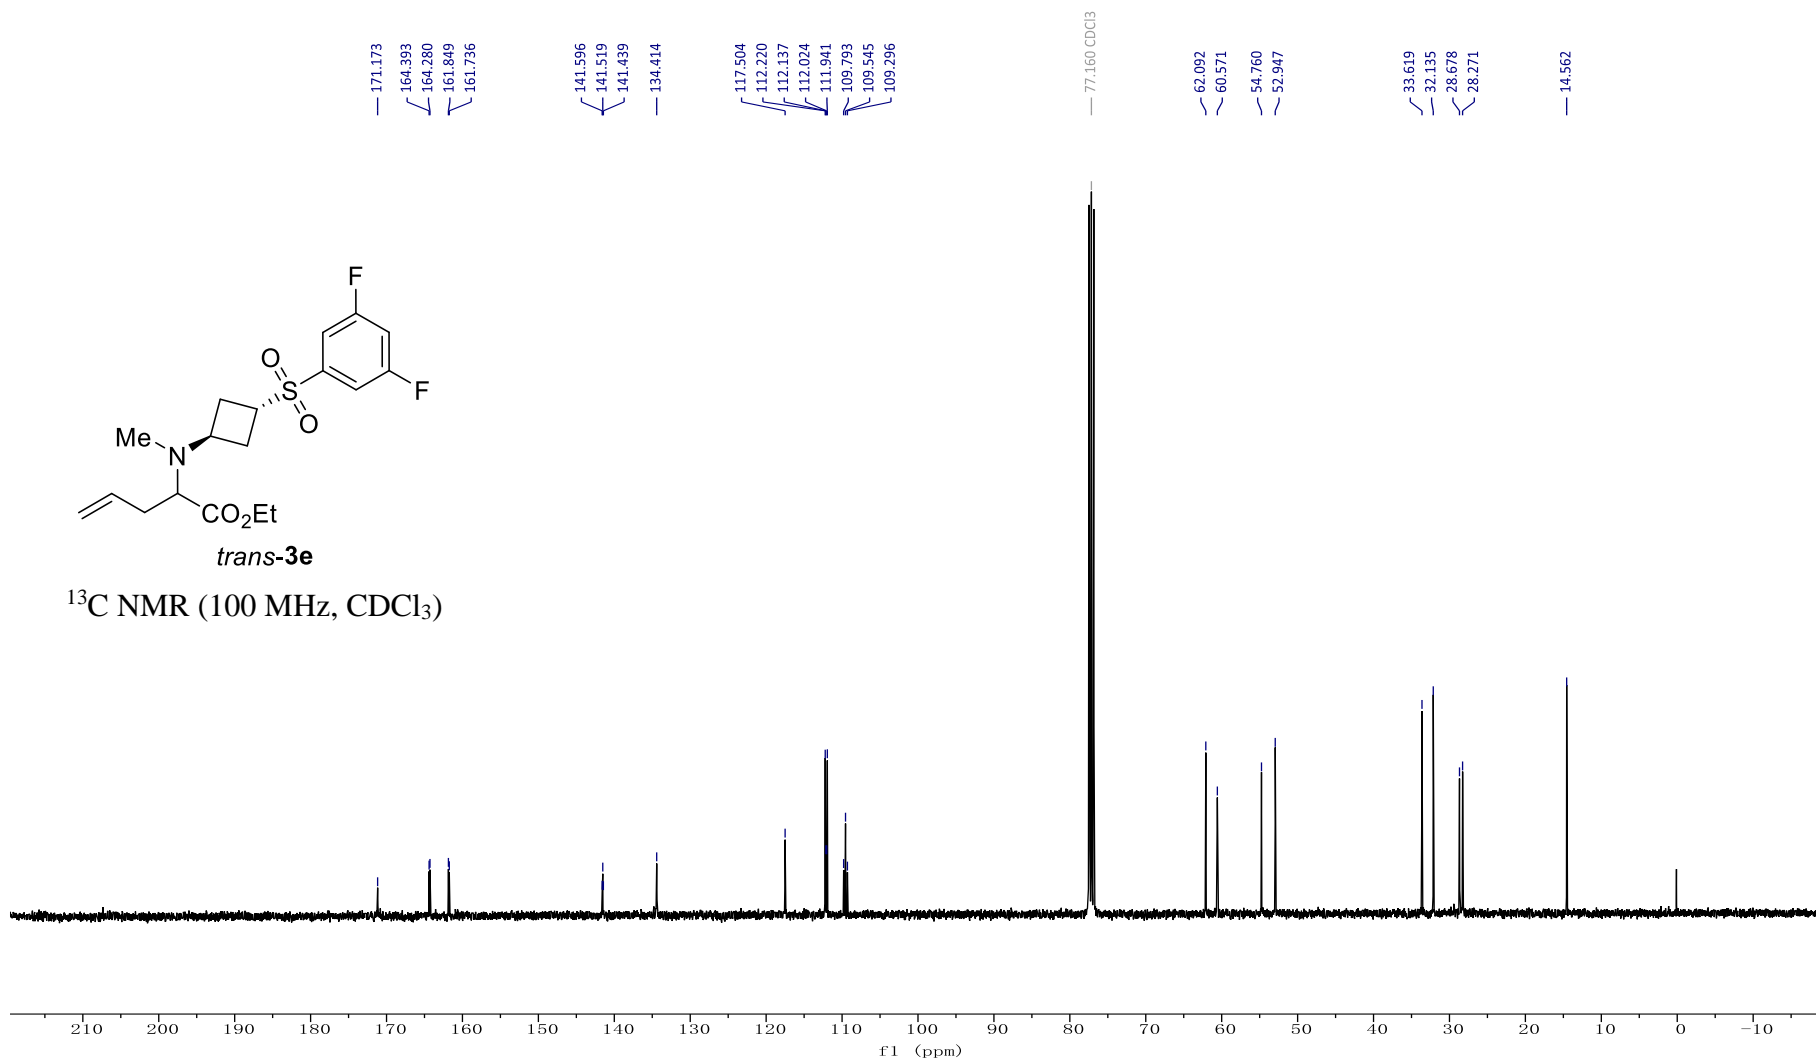

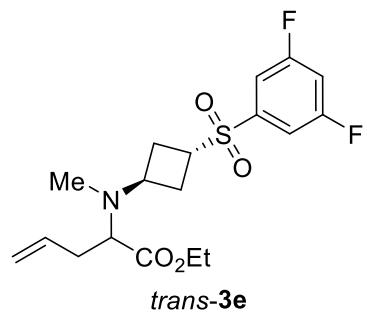

<sup>19</sup>F NMR (376 MHz, CDCl<sub>3</sub>)

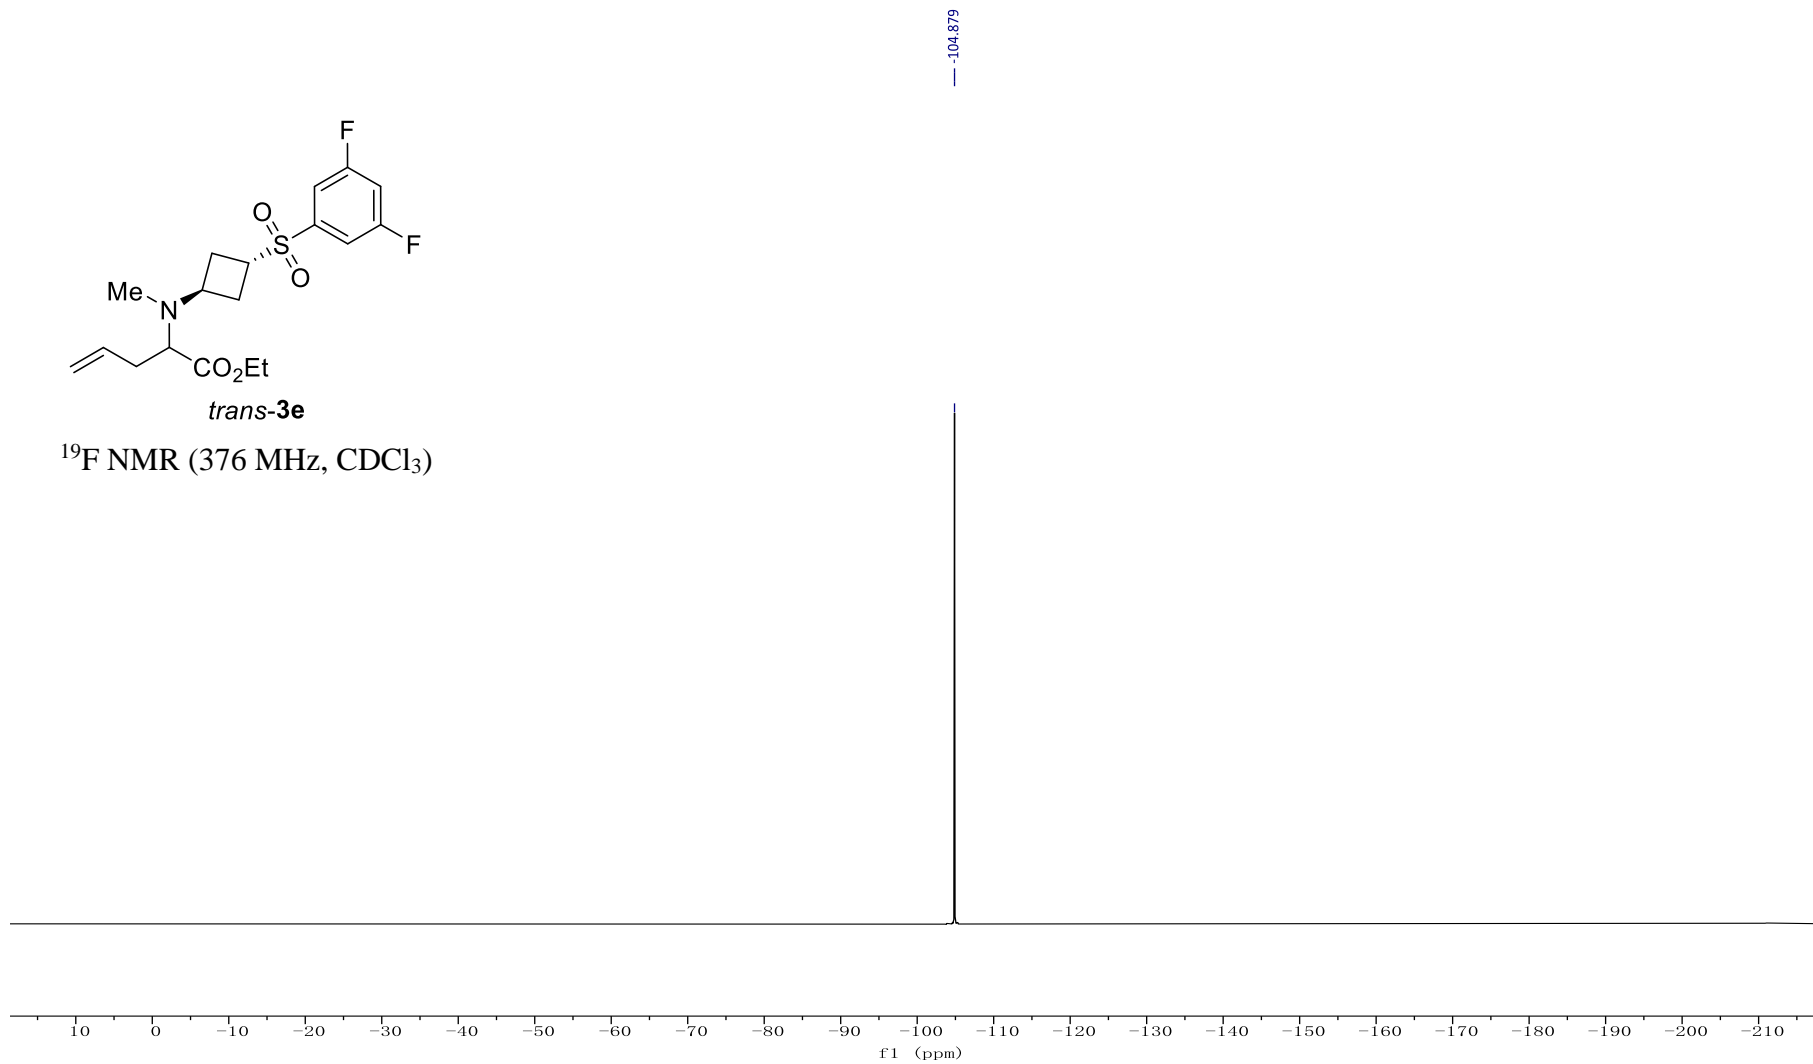

7.463  
7.459  
7.451  
7.447  
7.440  
7.432  
7.427  
7.419  
7.415  
7.148  
7.143  
7.138  
7.131  
7.126  
7.121  
7.115  
7.110  
7.104  
5.744  
5.738  
5.730  
5.724  
5.719  
5.710  
5.705  
5.695  
5.690  
5.090  
5.063  
5.059  
5.056  
5.052  
5.043  
5.029  
5.024  
5.018  
5.012  
4.996  
3.711  
3.702  
3.695  
3.682  
3.664  
3.272  
3.259  
3.255  
3.245  
3.241  
3.234  
3.228  
2.638  
2.629  
2.619  
2.611  
2.602  
2.595  
2.585  
2.576  
2.502  
2.494  
2.489  
2.484  
2.473  
2.470  
2.460  
2.455  
2.442  
2.437  
2.423  
2.418  
2.418  
2.385  
2.328  
2.323  
2.313  
2.308  
2.303  
2.298  
2.294  
2.289  
2.197  
2.194  
2.186  
2.182  
2.134  
-0.000

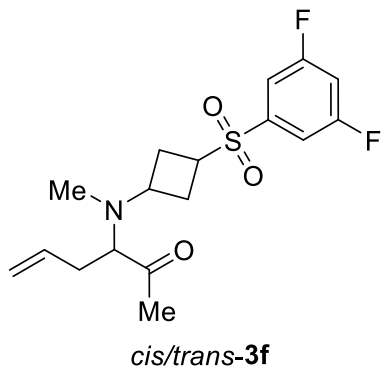

$^1\text{H NMR}$  (500 MHz,  $\text{CDCl}_3$ )

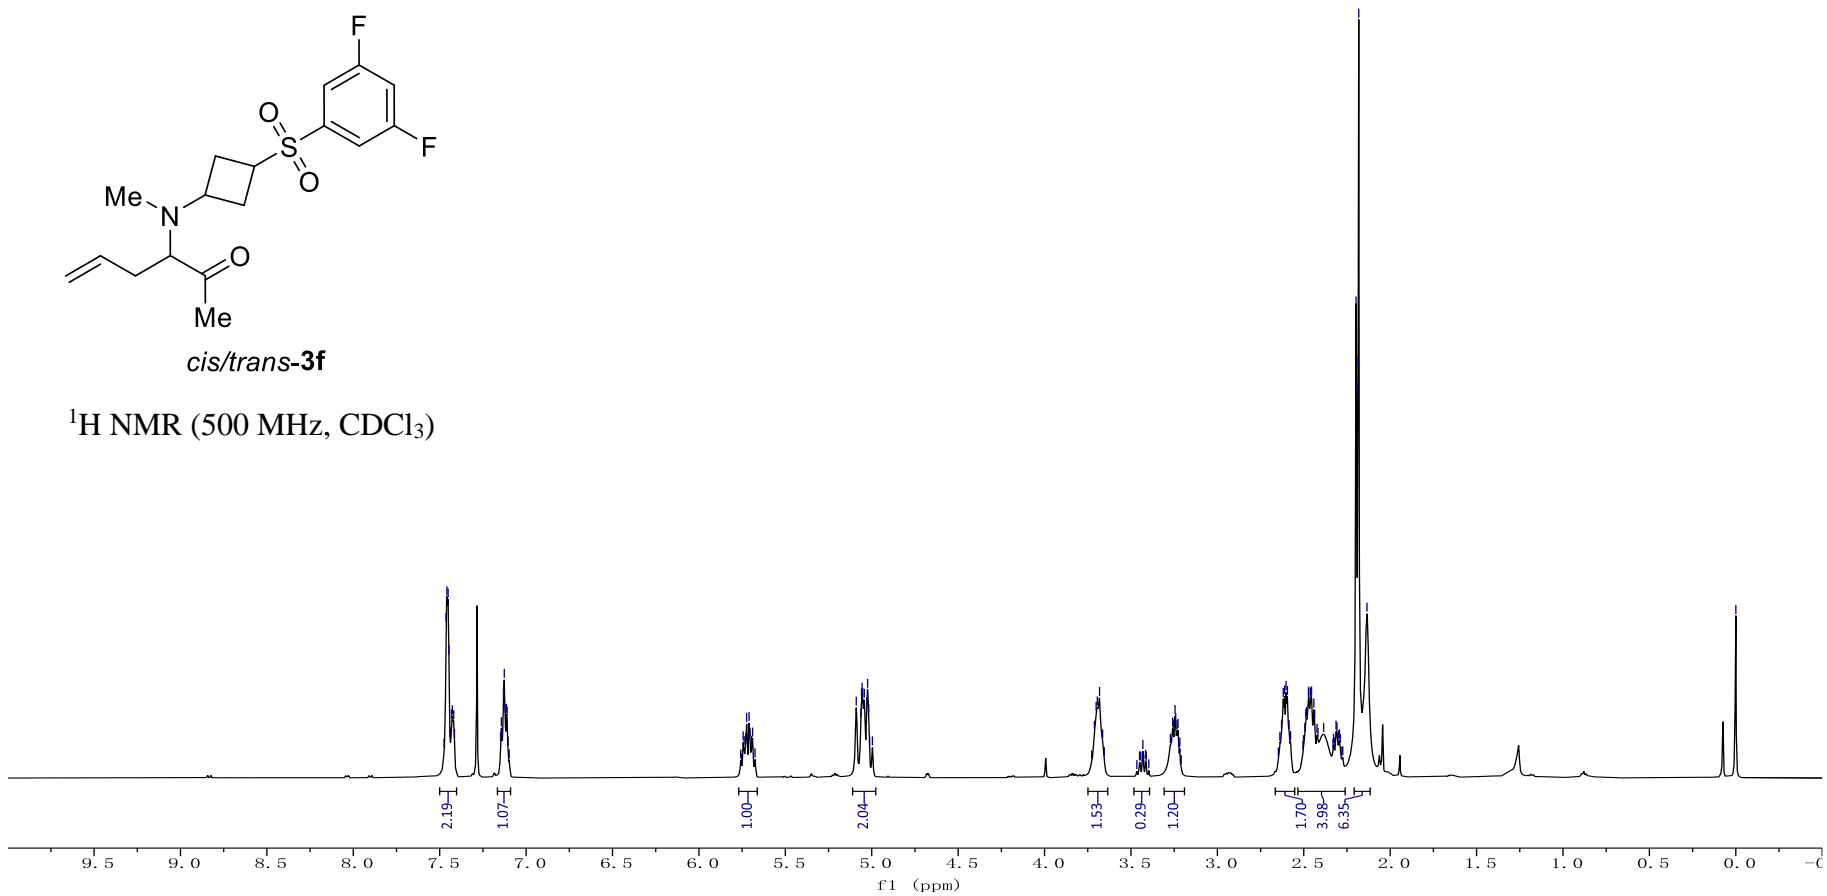

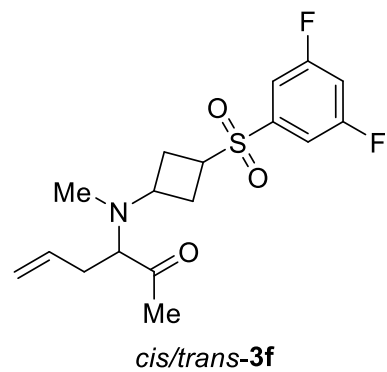

$^{13}\text{C}$  NMR (125 MHz,  $\text{CDCl}_3$ )

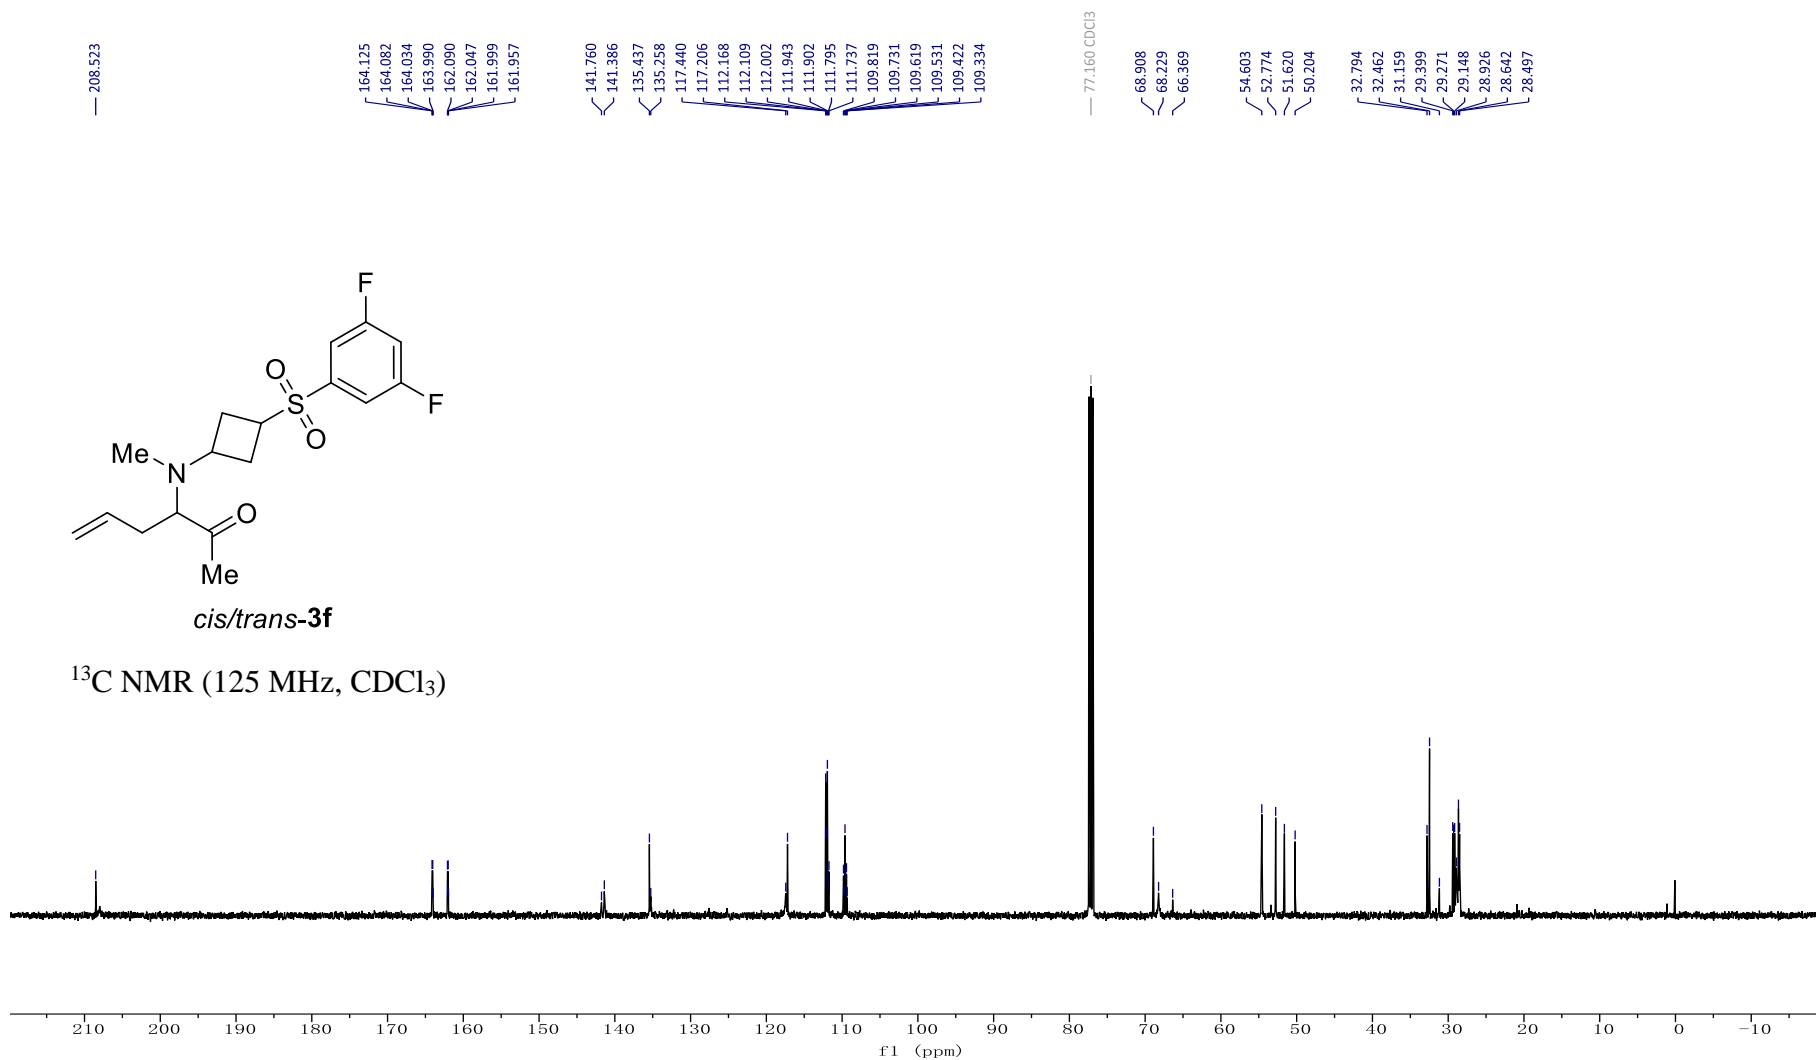



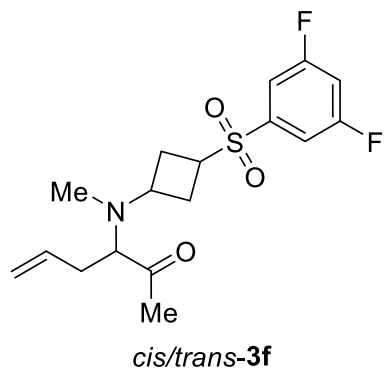

$^{19}\text{F}$  NMR (471 MHz,  $\text{CDCl}_3$ )

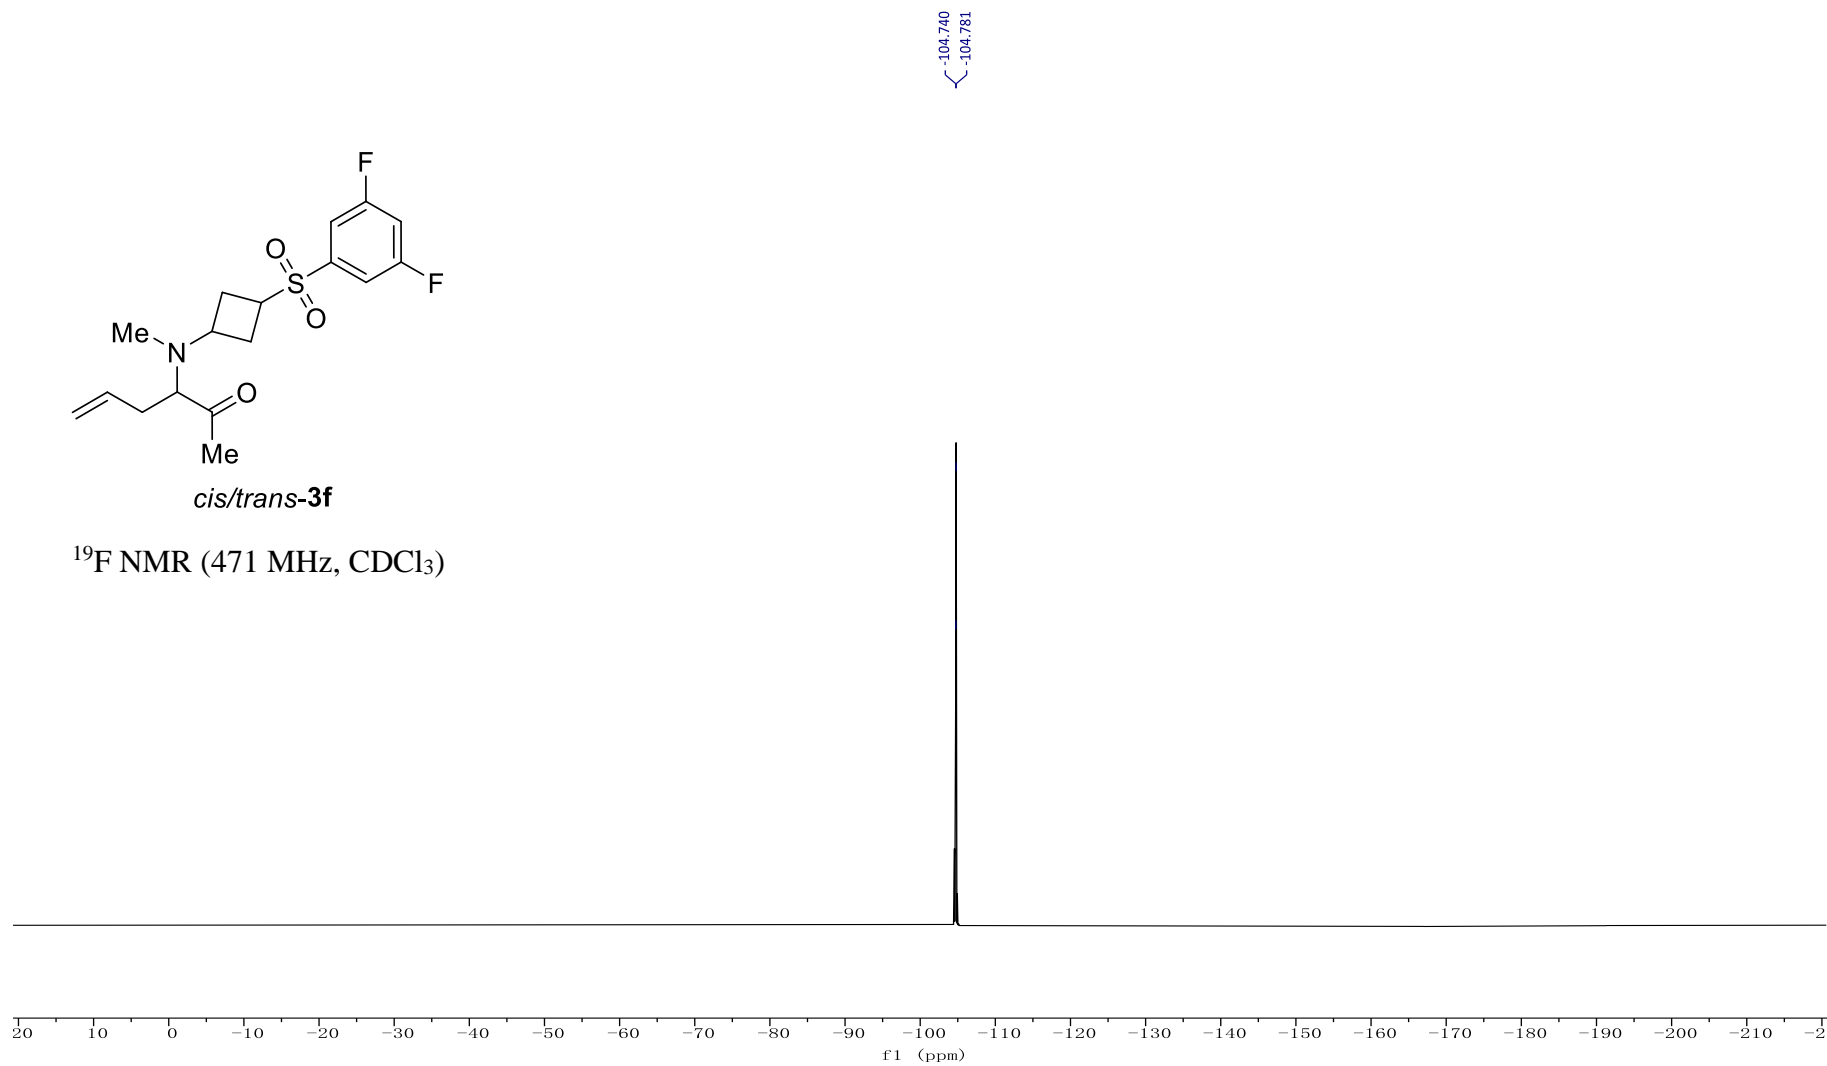

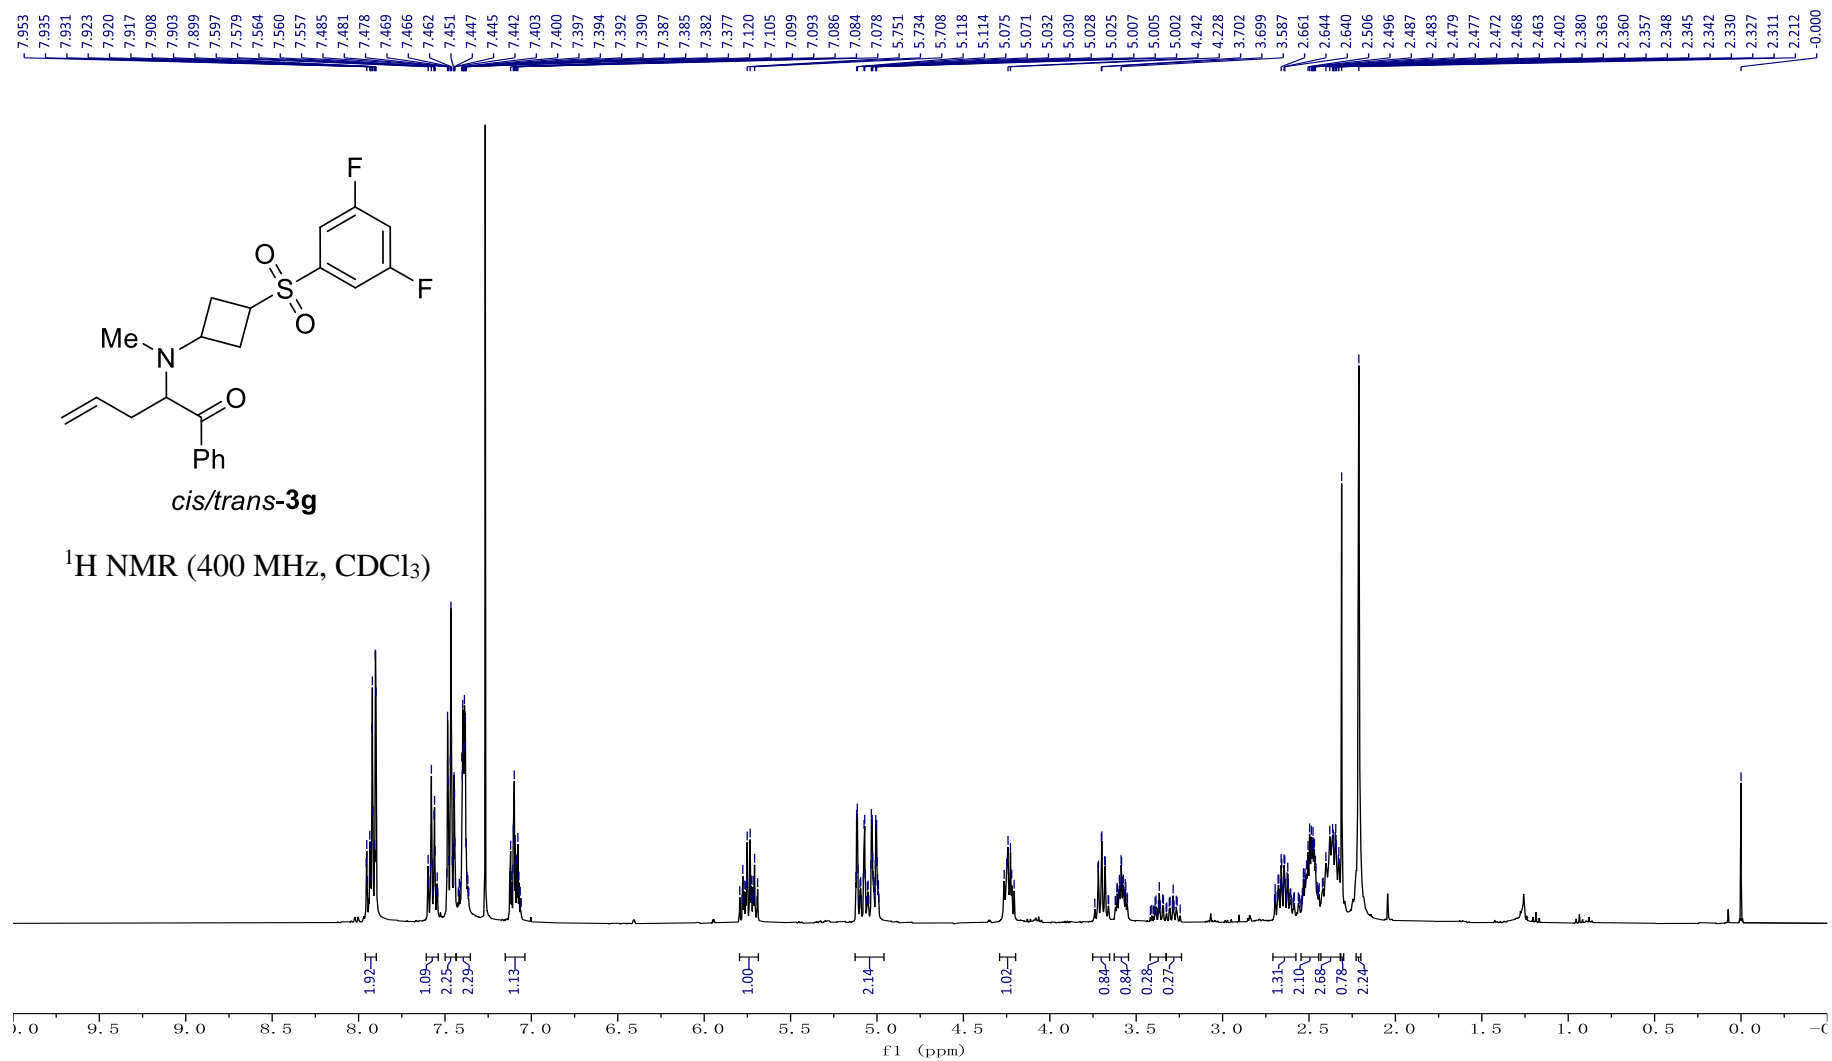

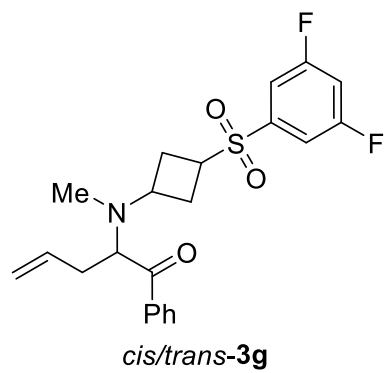

$^{13}\text{C}$  NMR (100 MHz,  $\text{CDCl}_3$ )

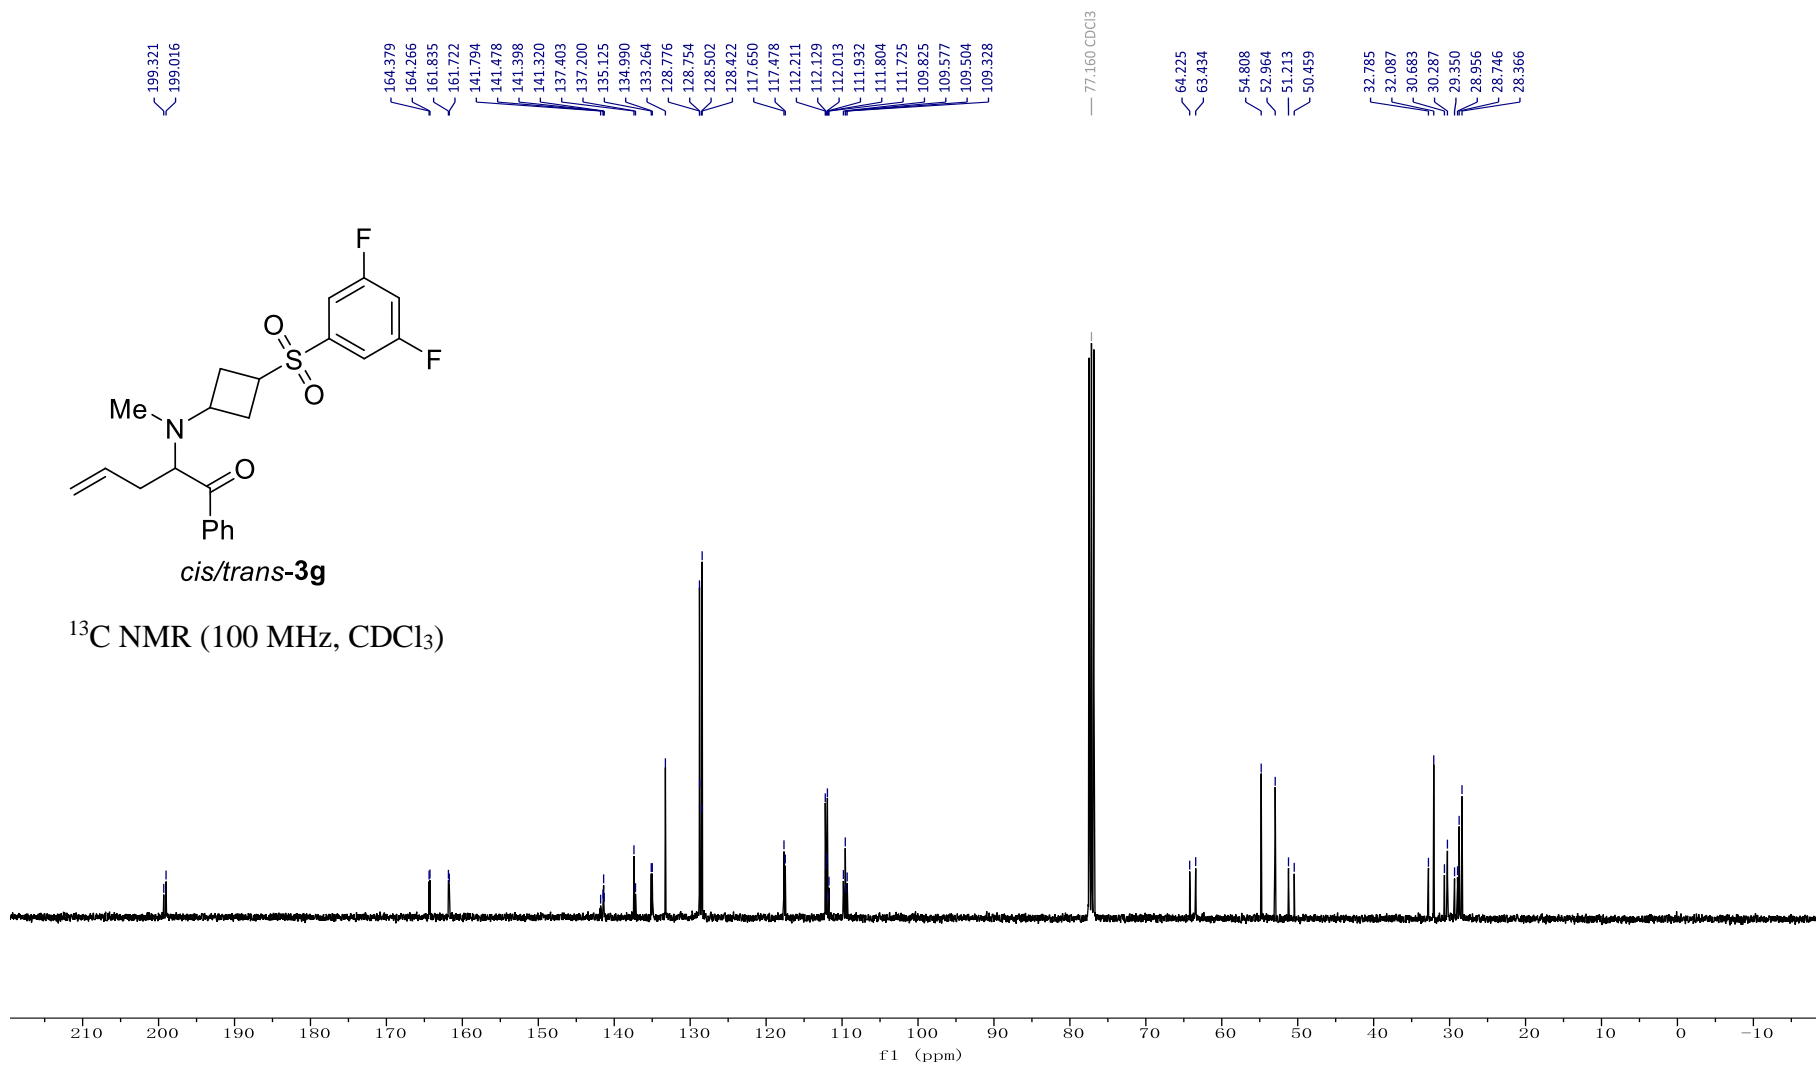

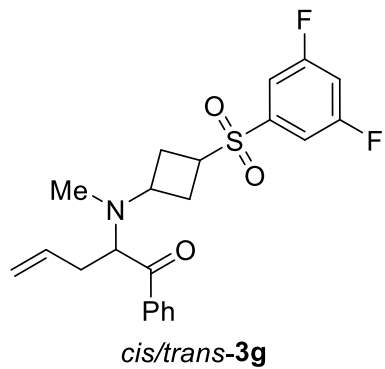

<sup>19</sup>F NMR (376 MHz, CDCl<sub>3</sub>)

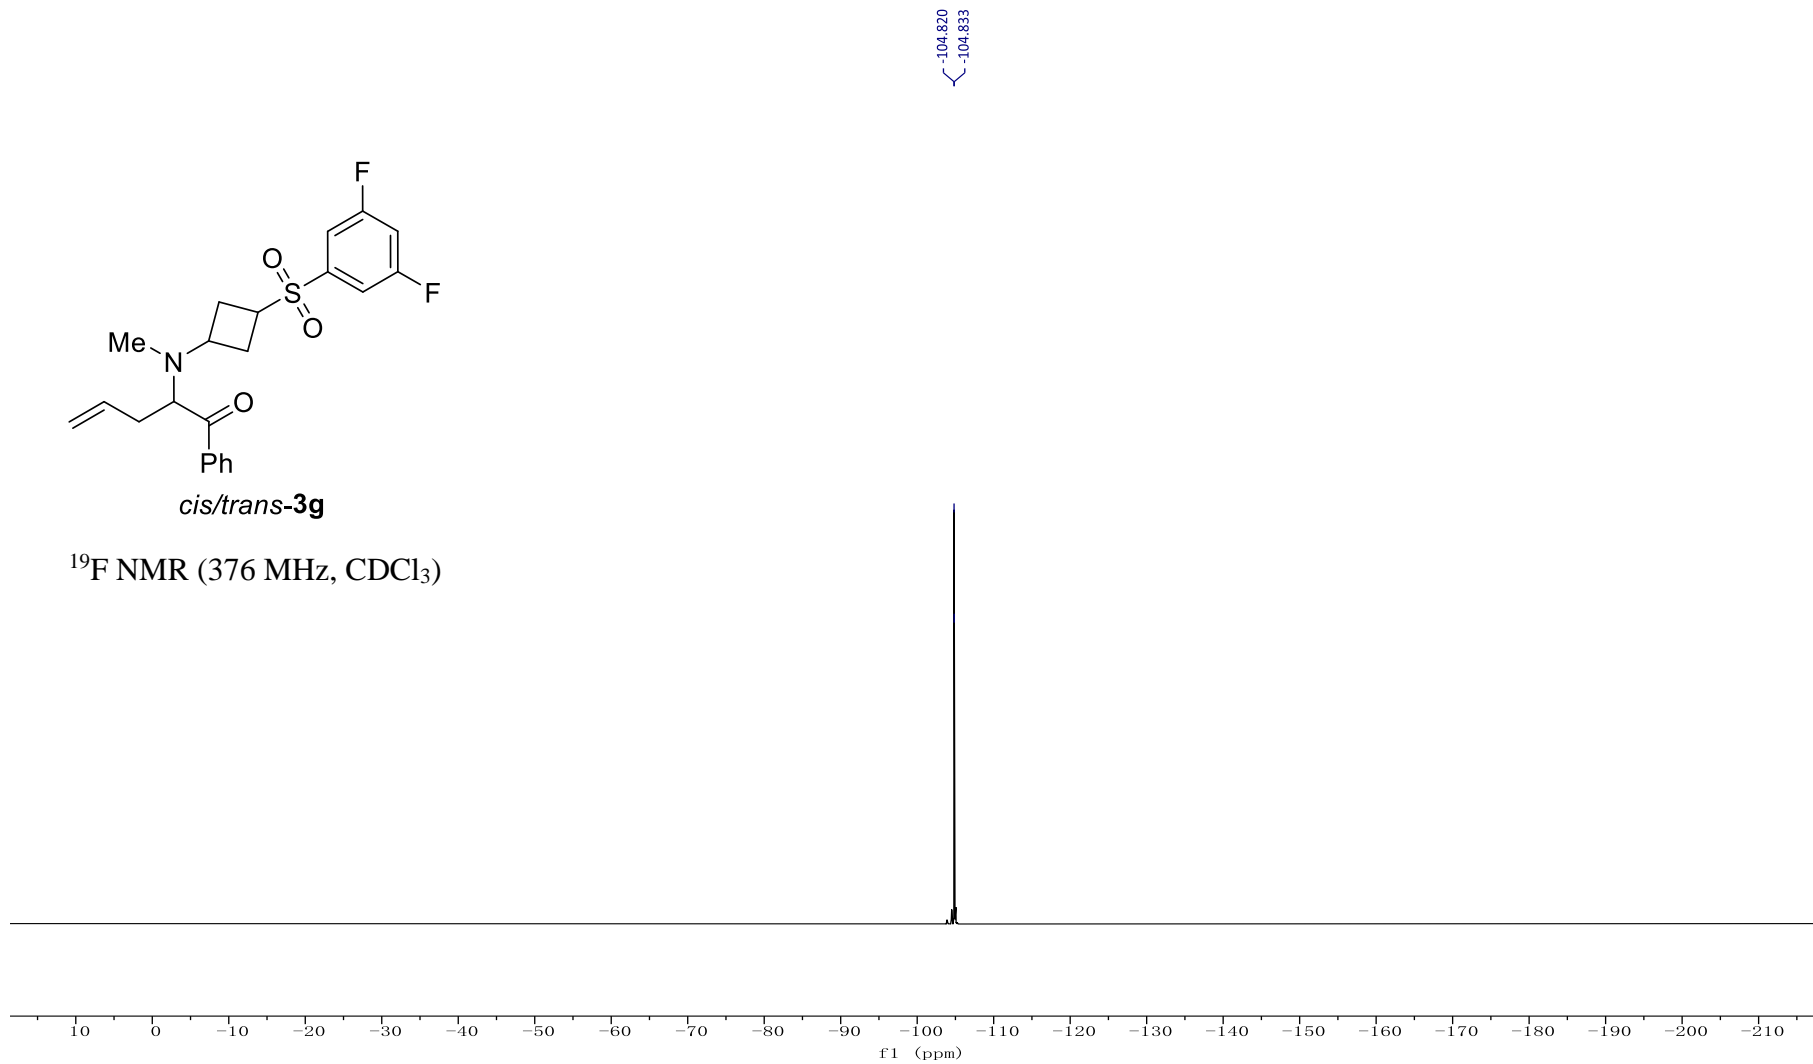

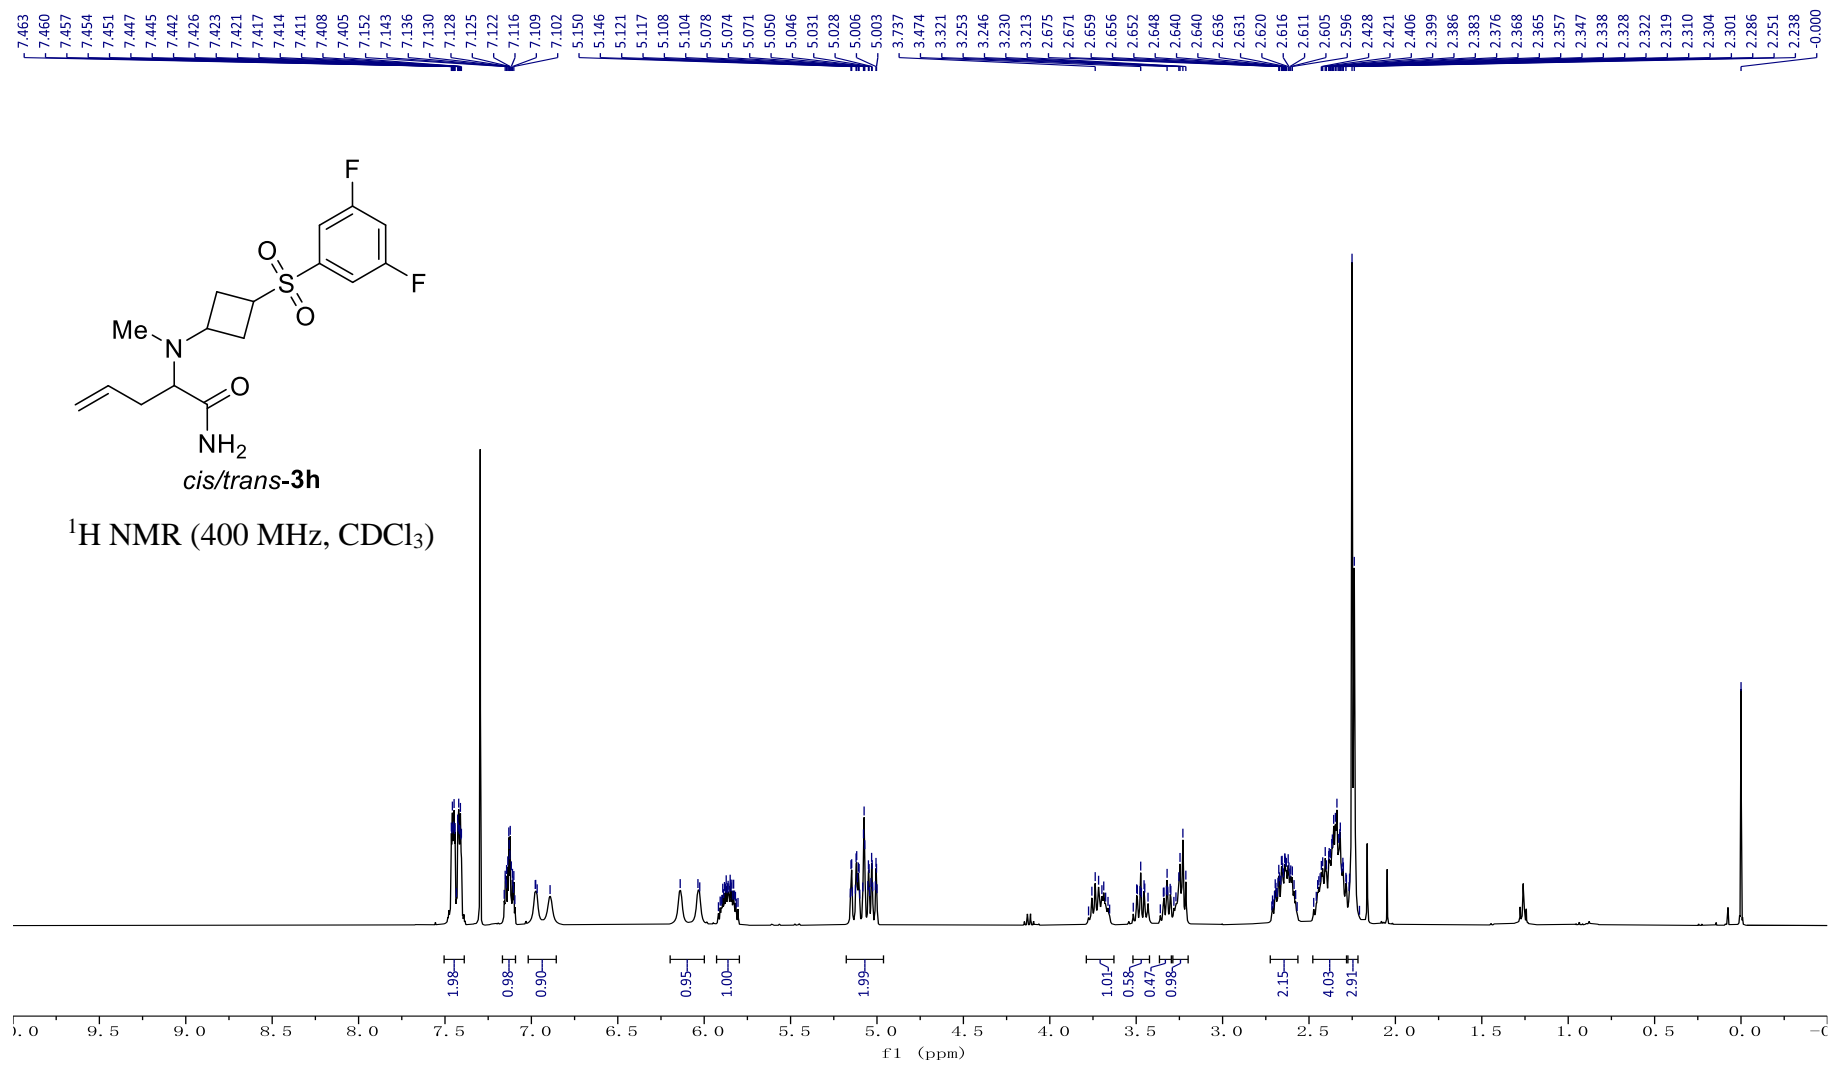

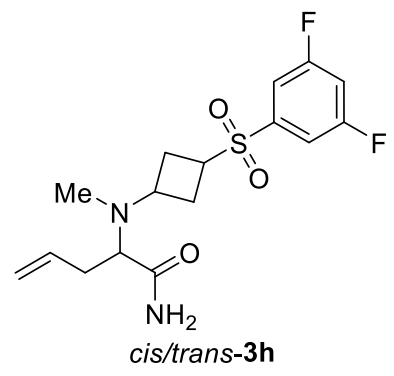

<sup>13</sup>C NMR (100 MHz, CDCl<sub>3</sub>)

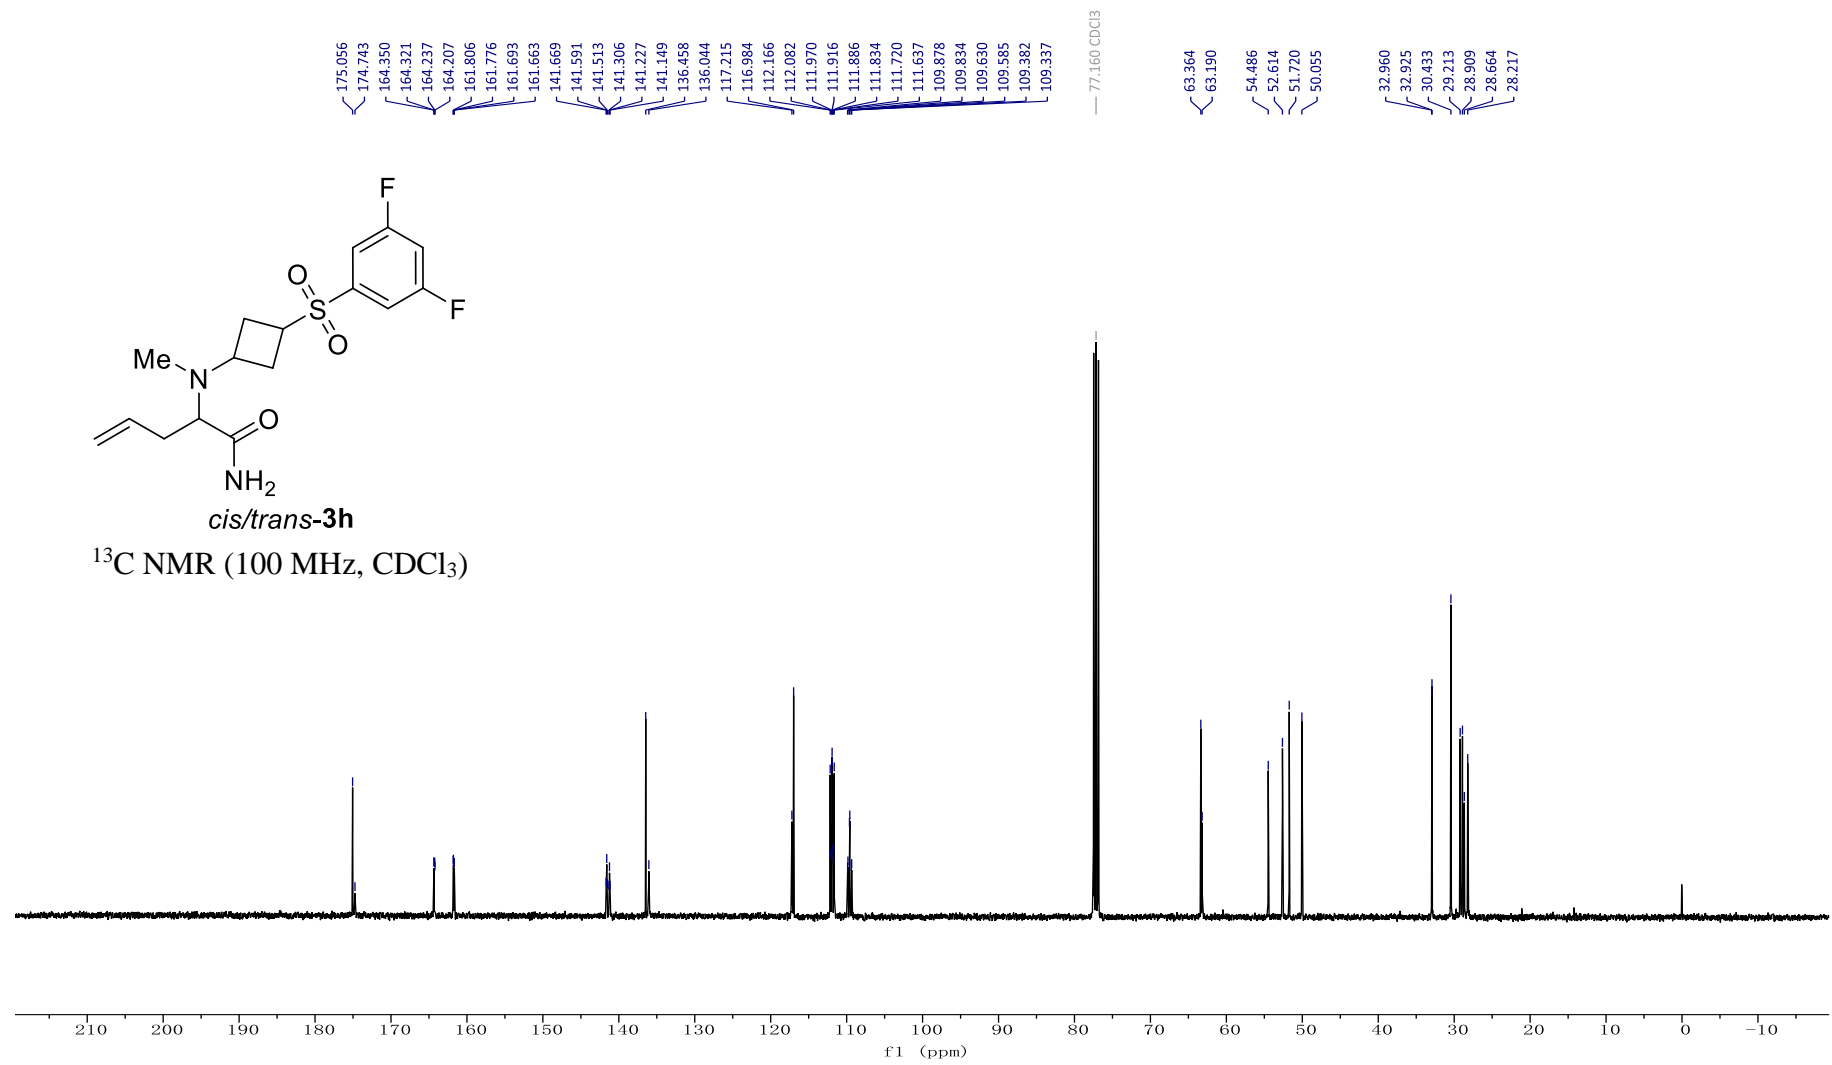

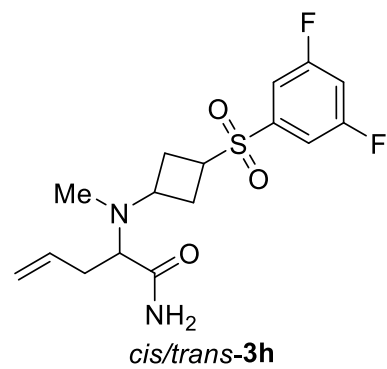

$^{19}\text{F}$  NMR (376 MHz,  $\text{CDCl}_3$ )

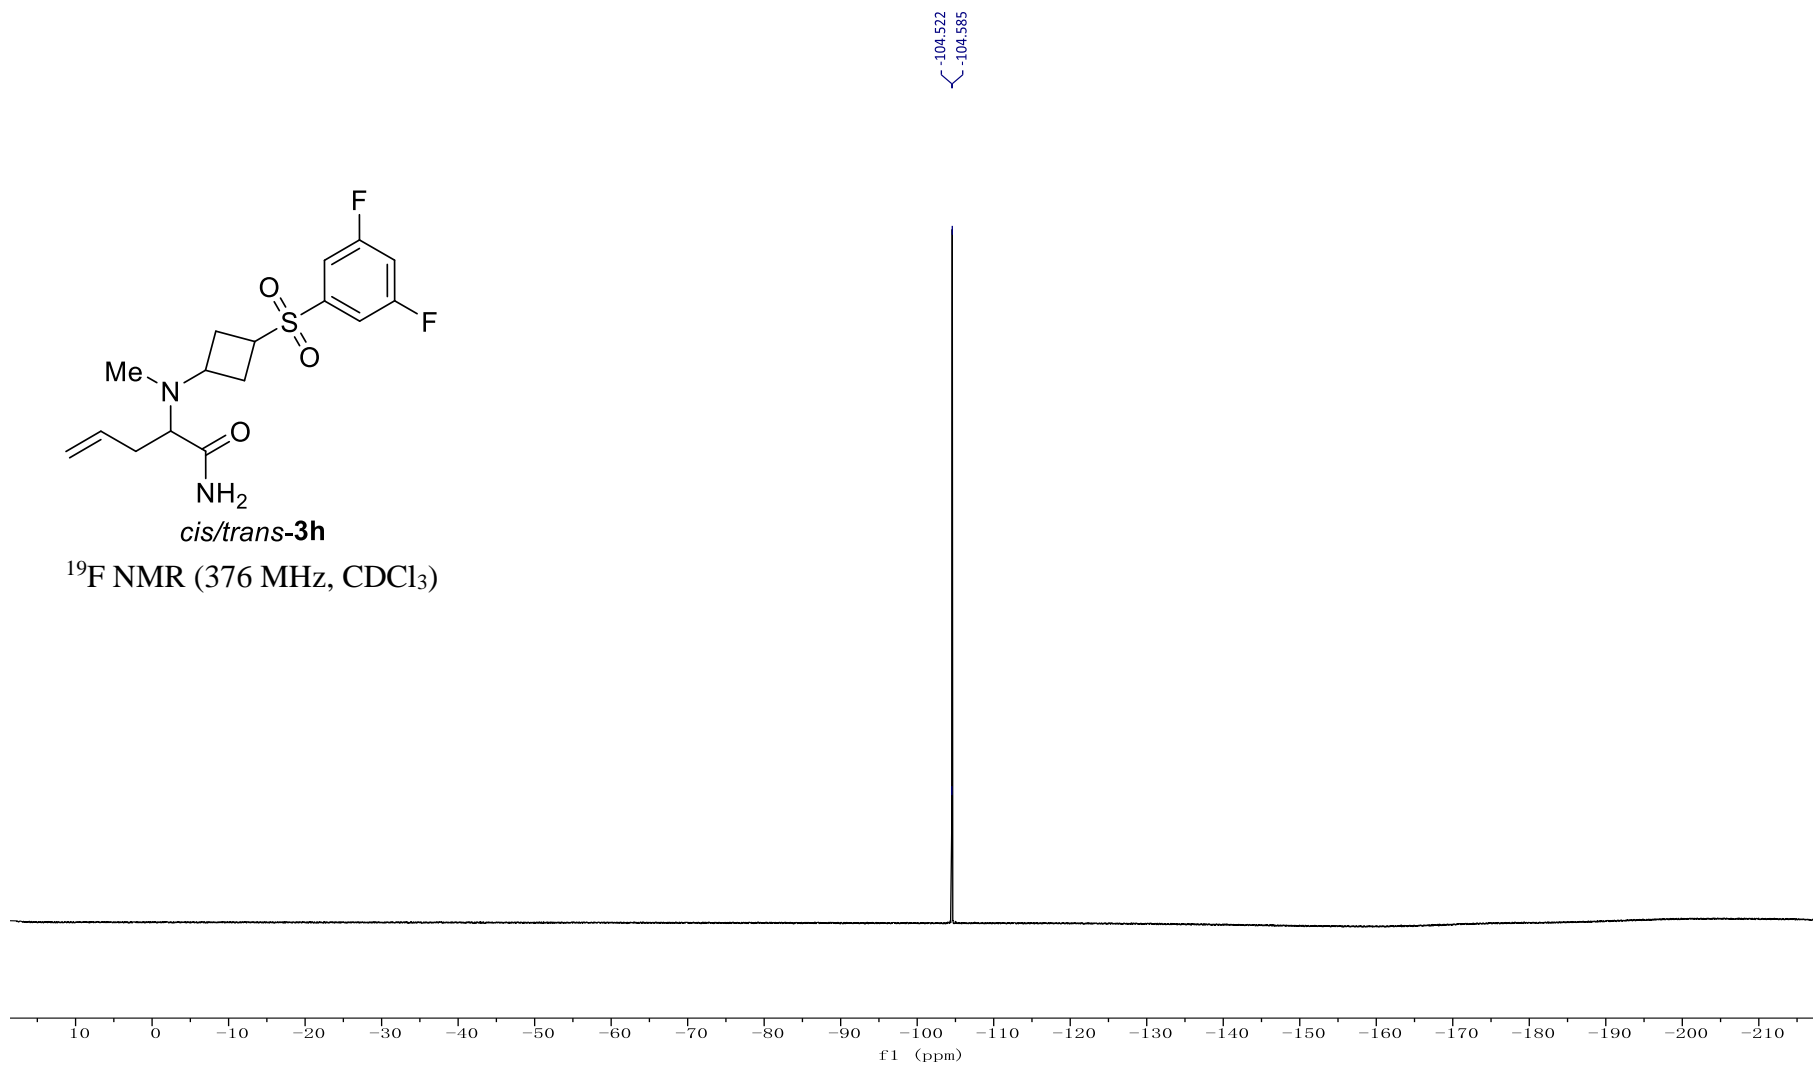

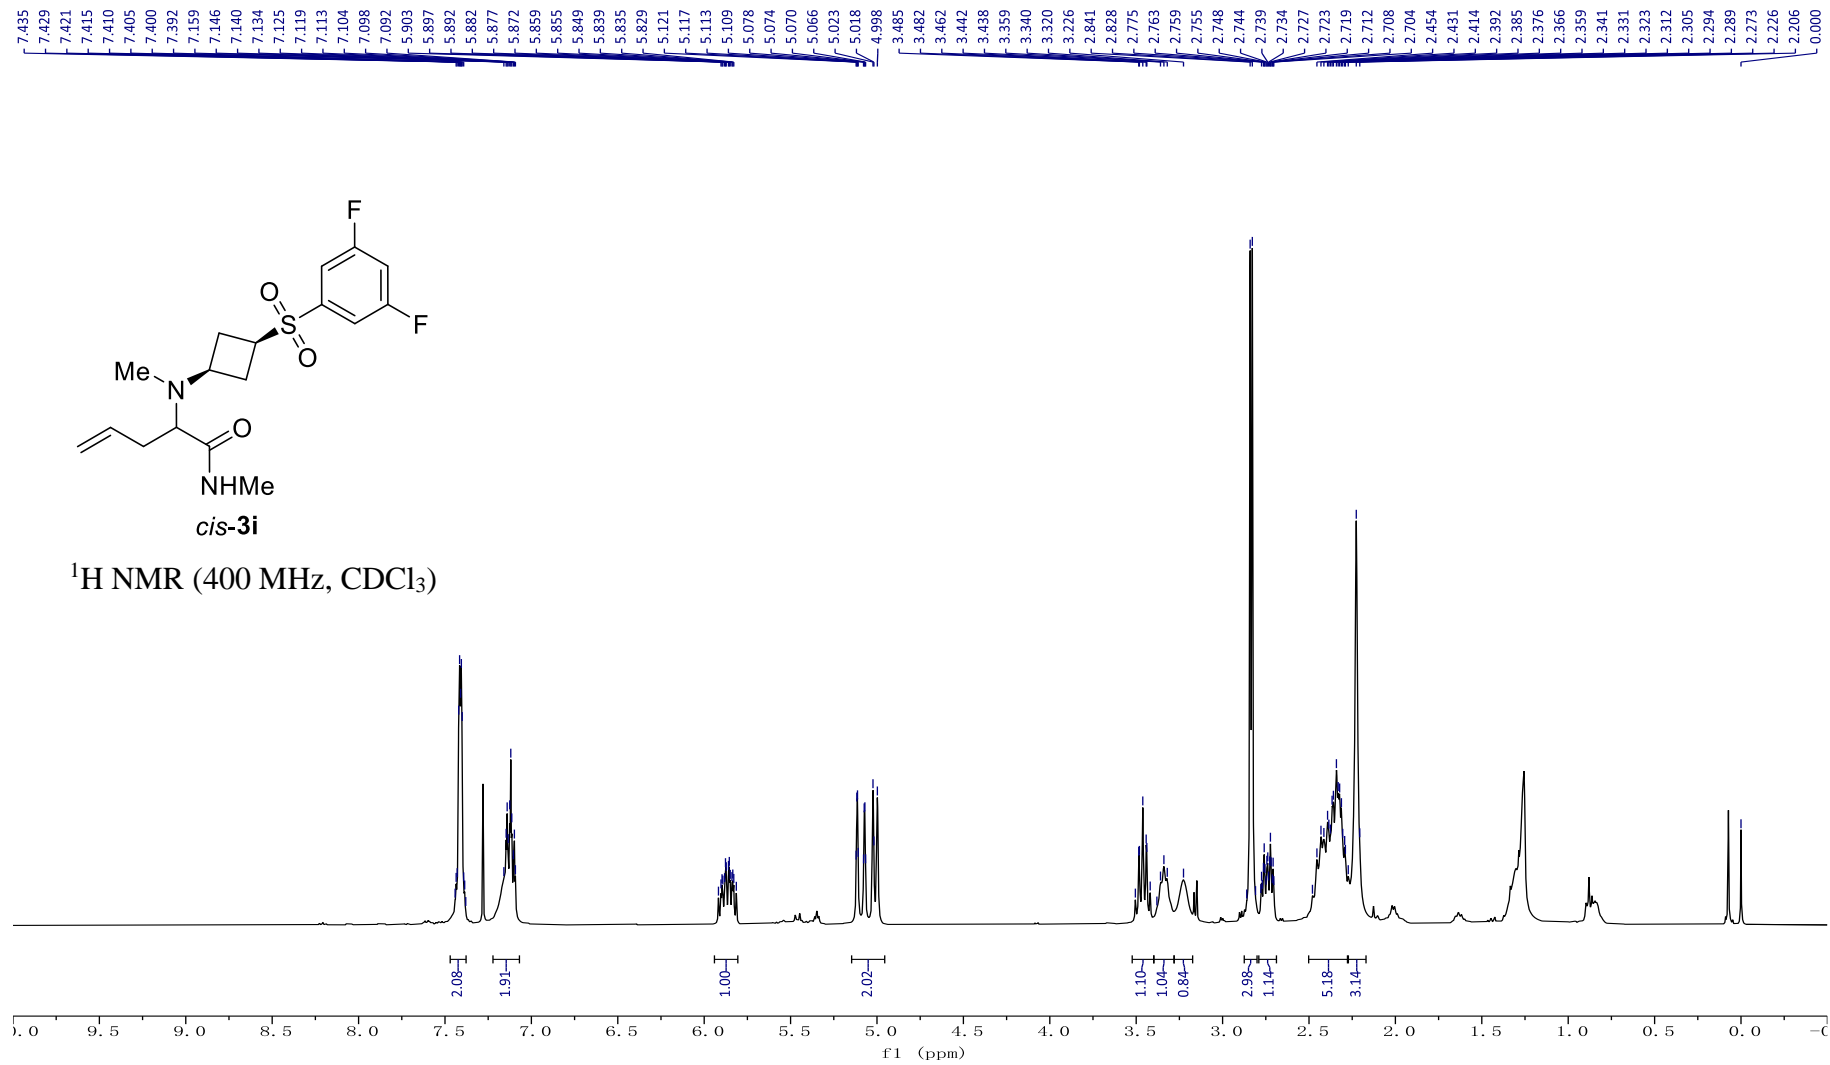



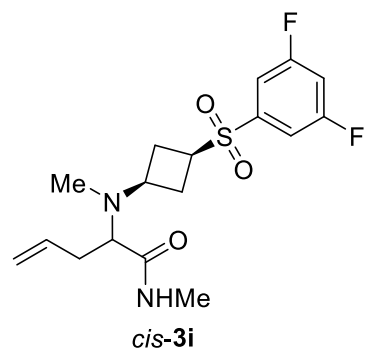

$^{13}\text{C}$  NMR (100 MHz,  $\text{CDCl}_3$ )

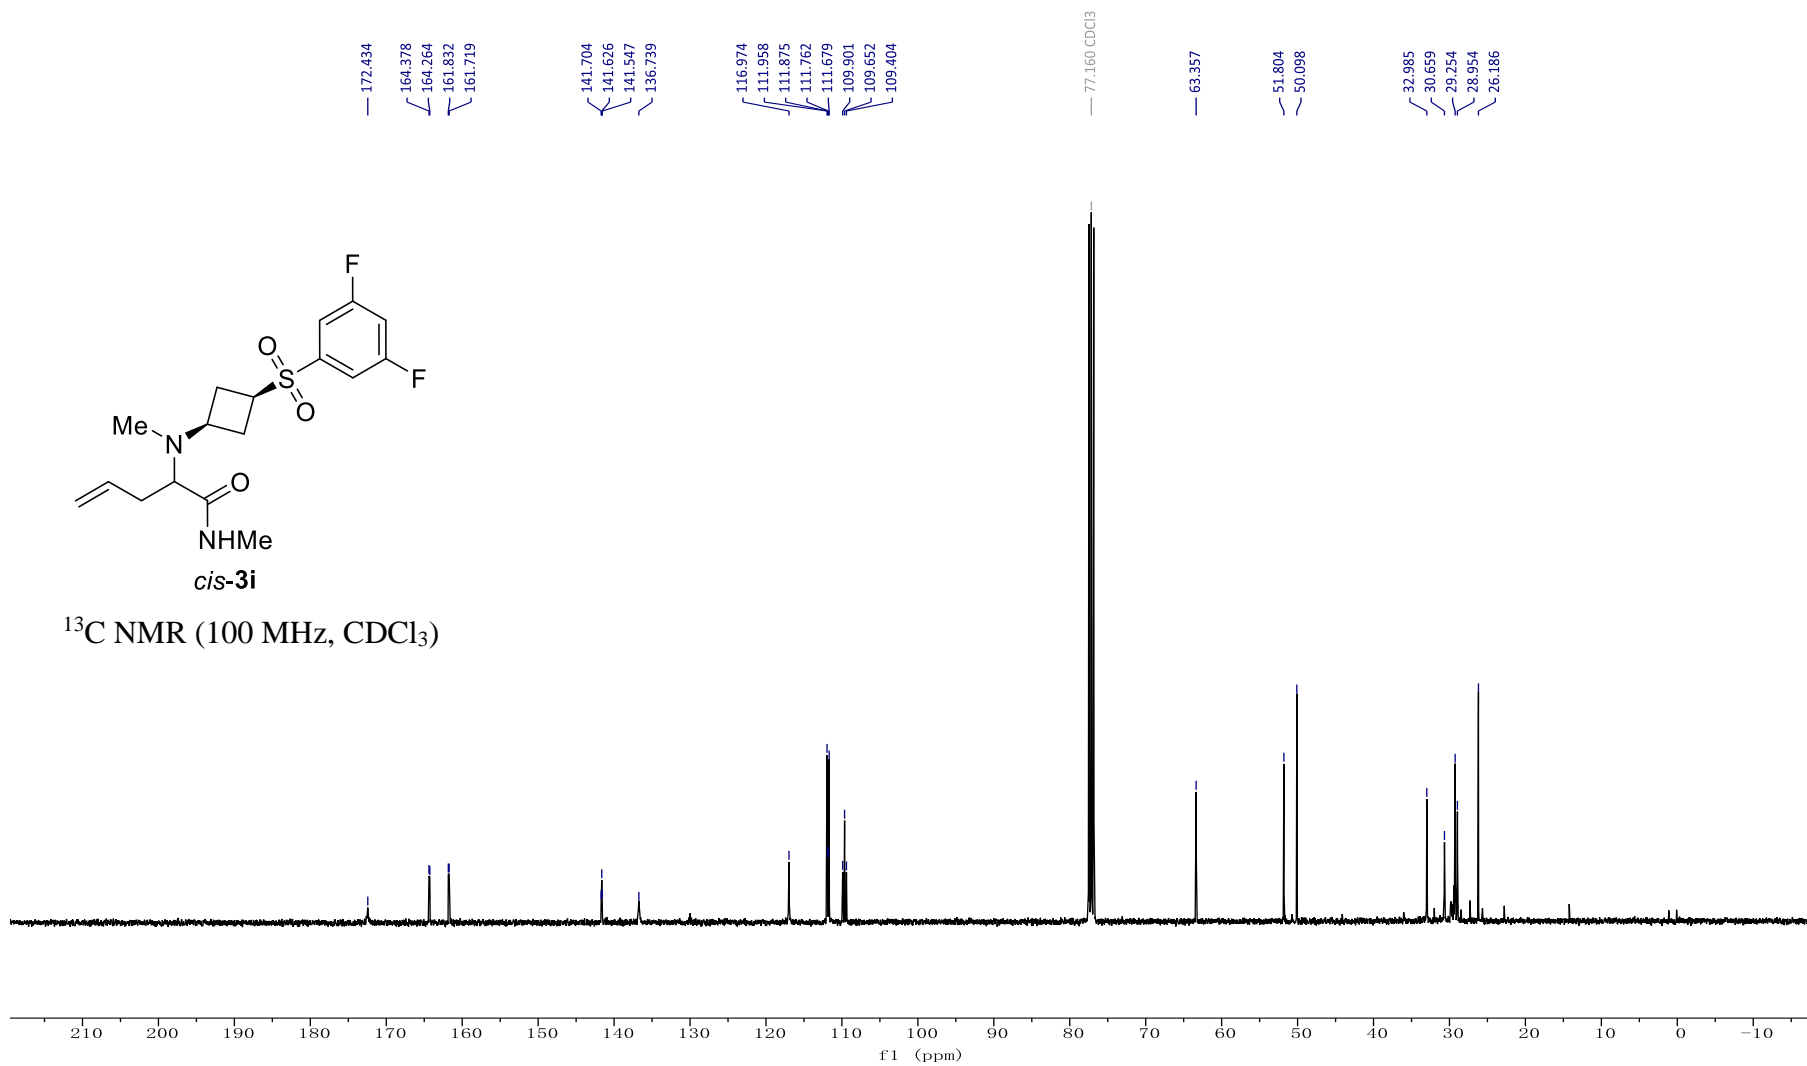

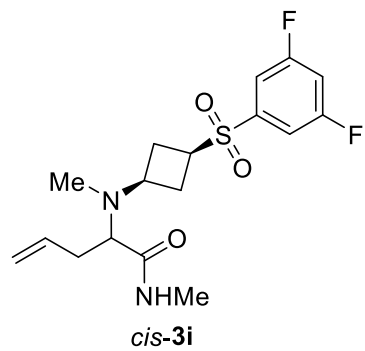

$^{19}\text{F}$  NMR (376 MHz,  $\text{CDCl}_3$ )

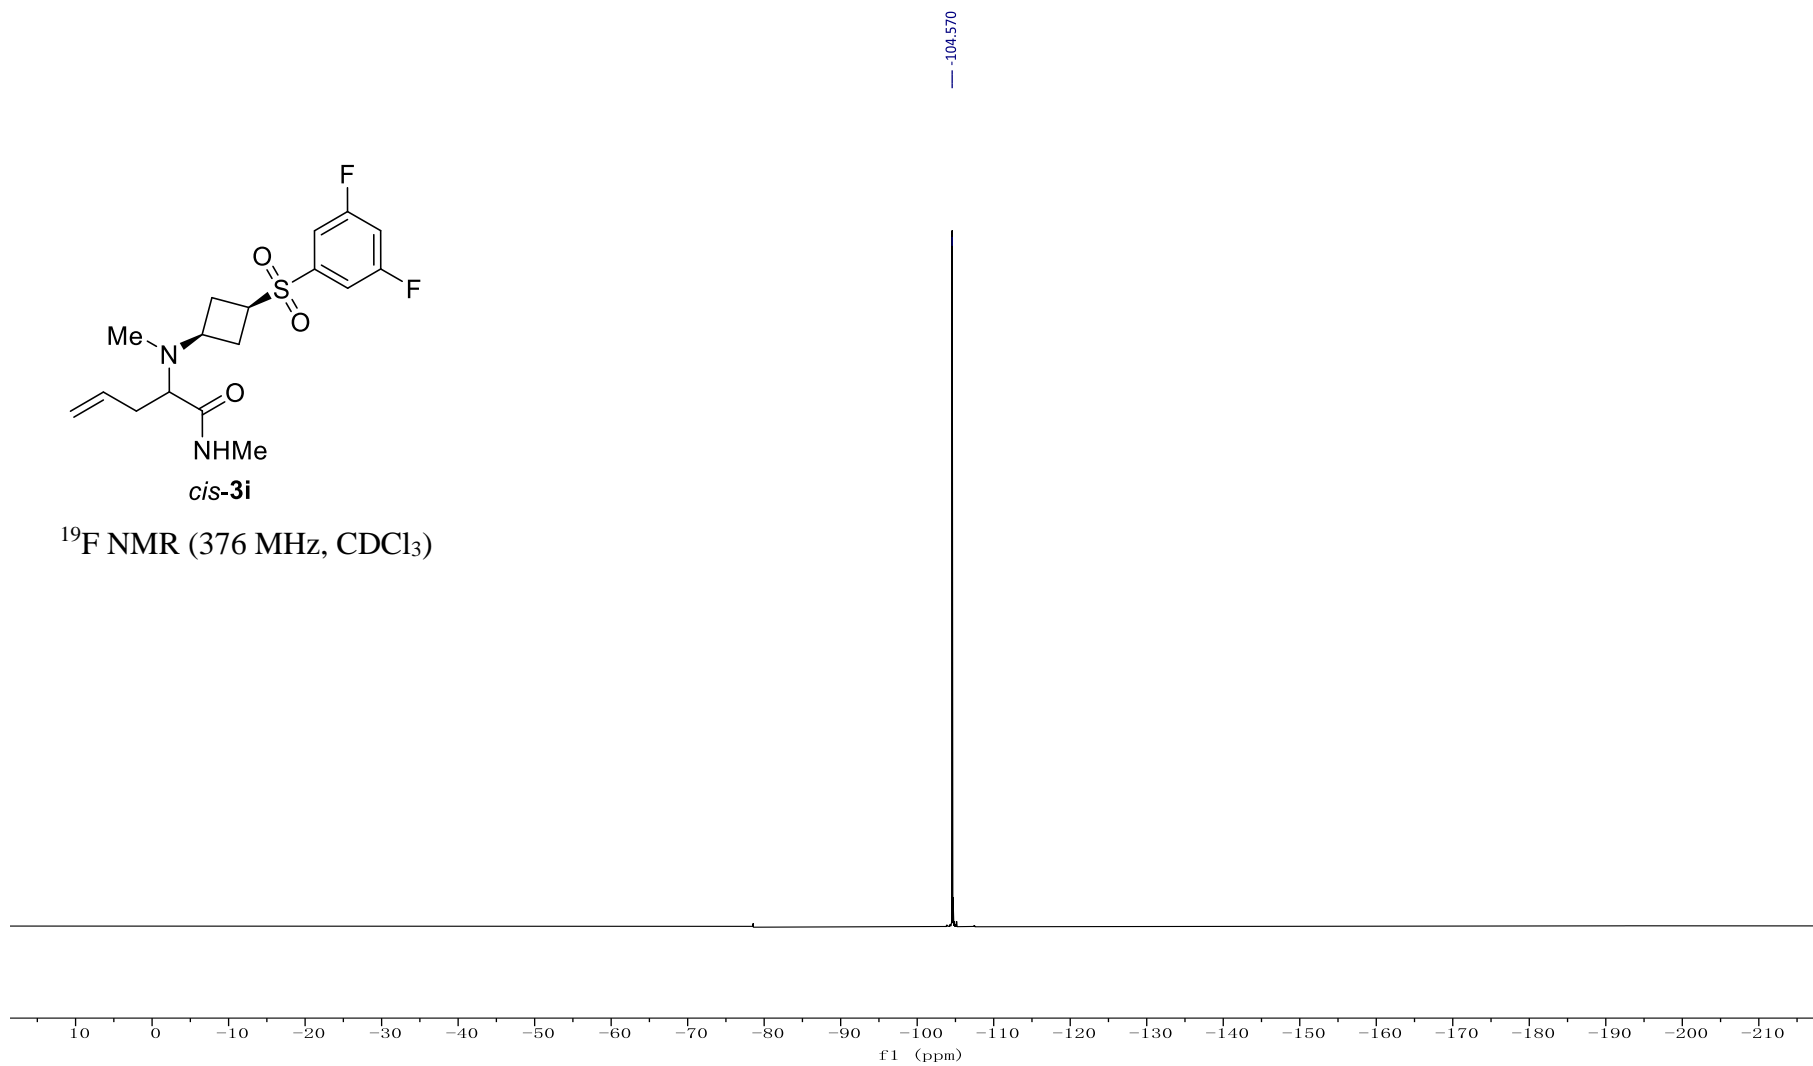

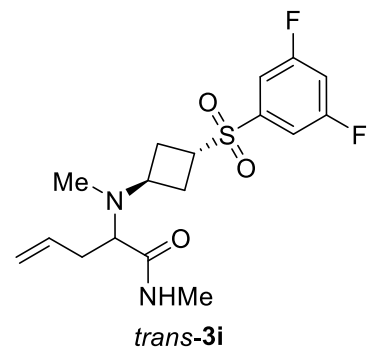

$^1\text{H NMR}$  (500 MHz,  $\text{CDCl}_3$ )

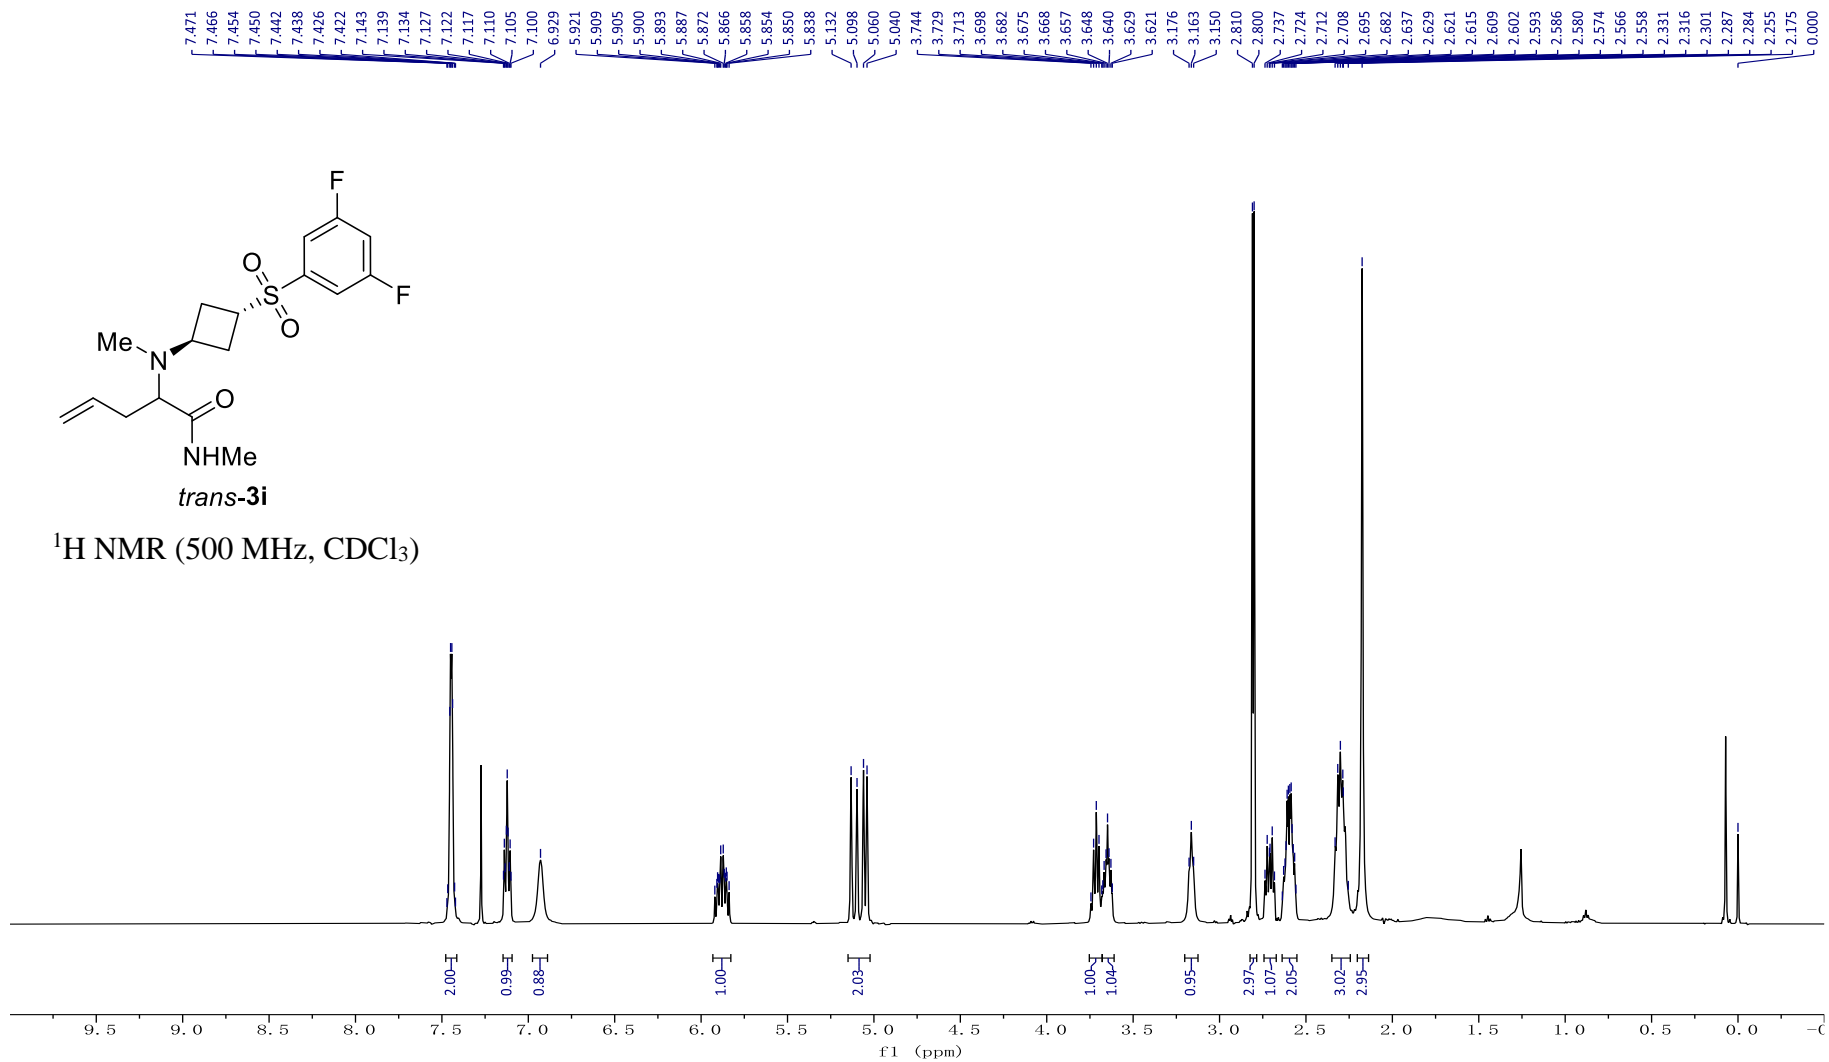

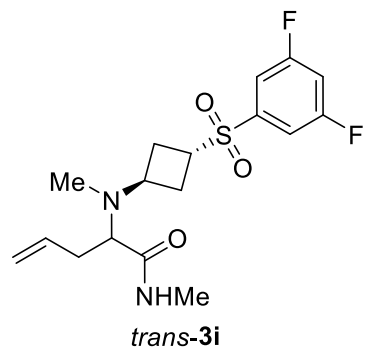

$^{13}\text{C}$  NMR (125 MHz,  $\text{CDCl}_3$ )

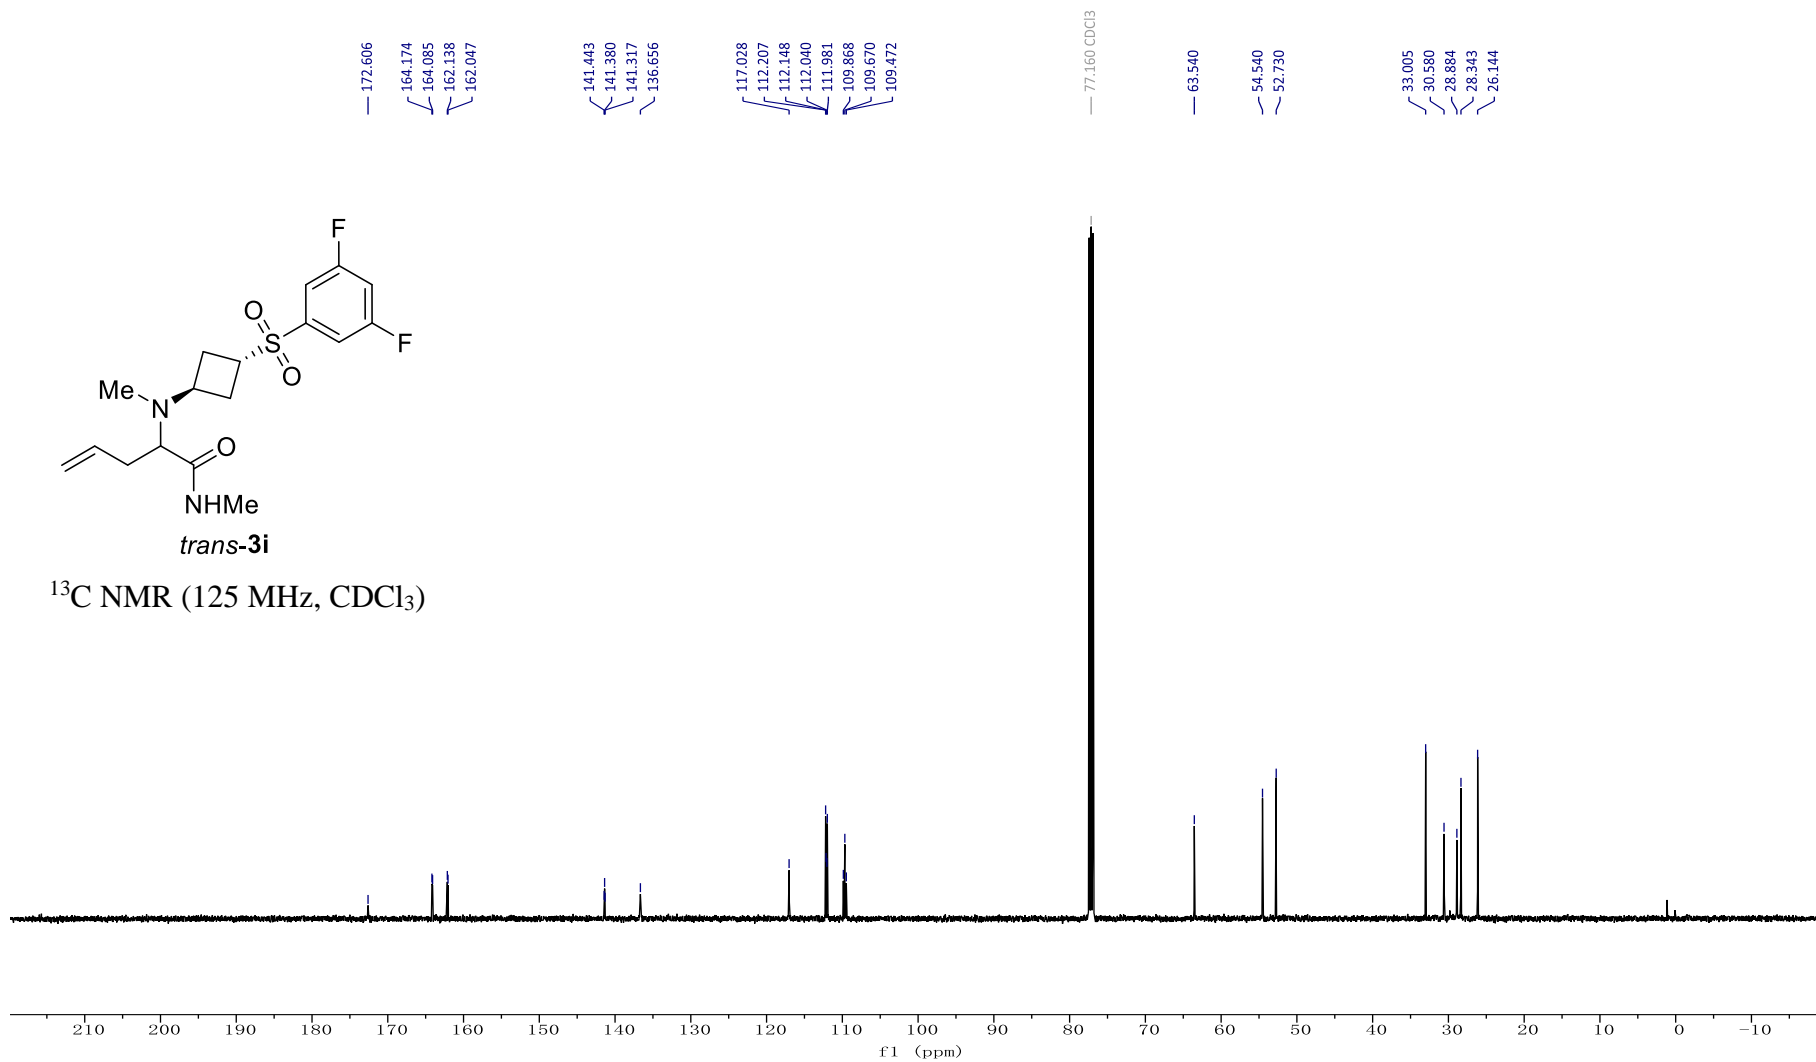

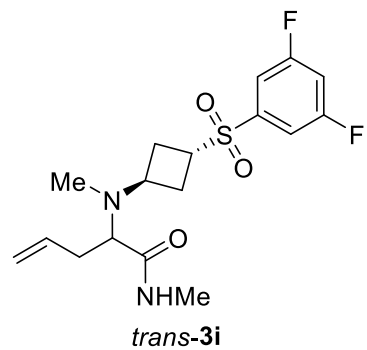

$^{19}\text{F}$  NMR (471 MHz,  $\text{CDCl}_3$ )

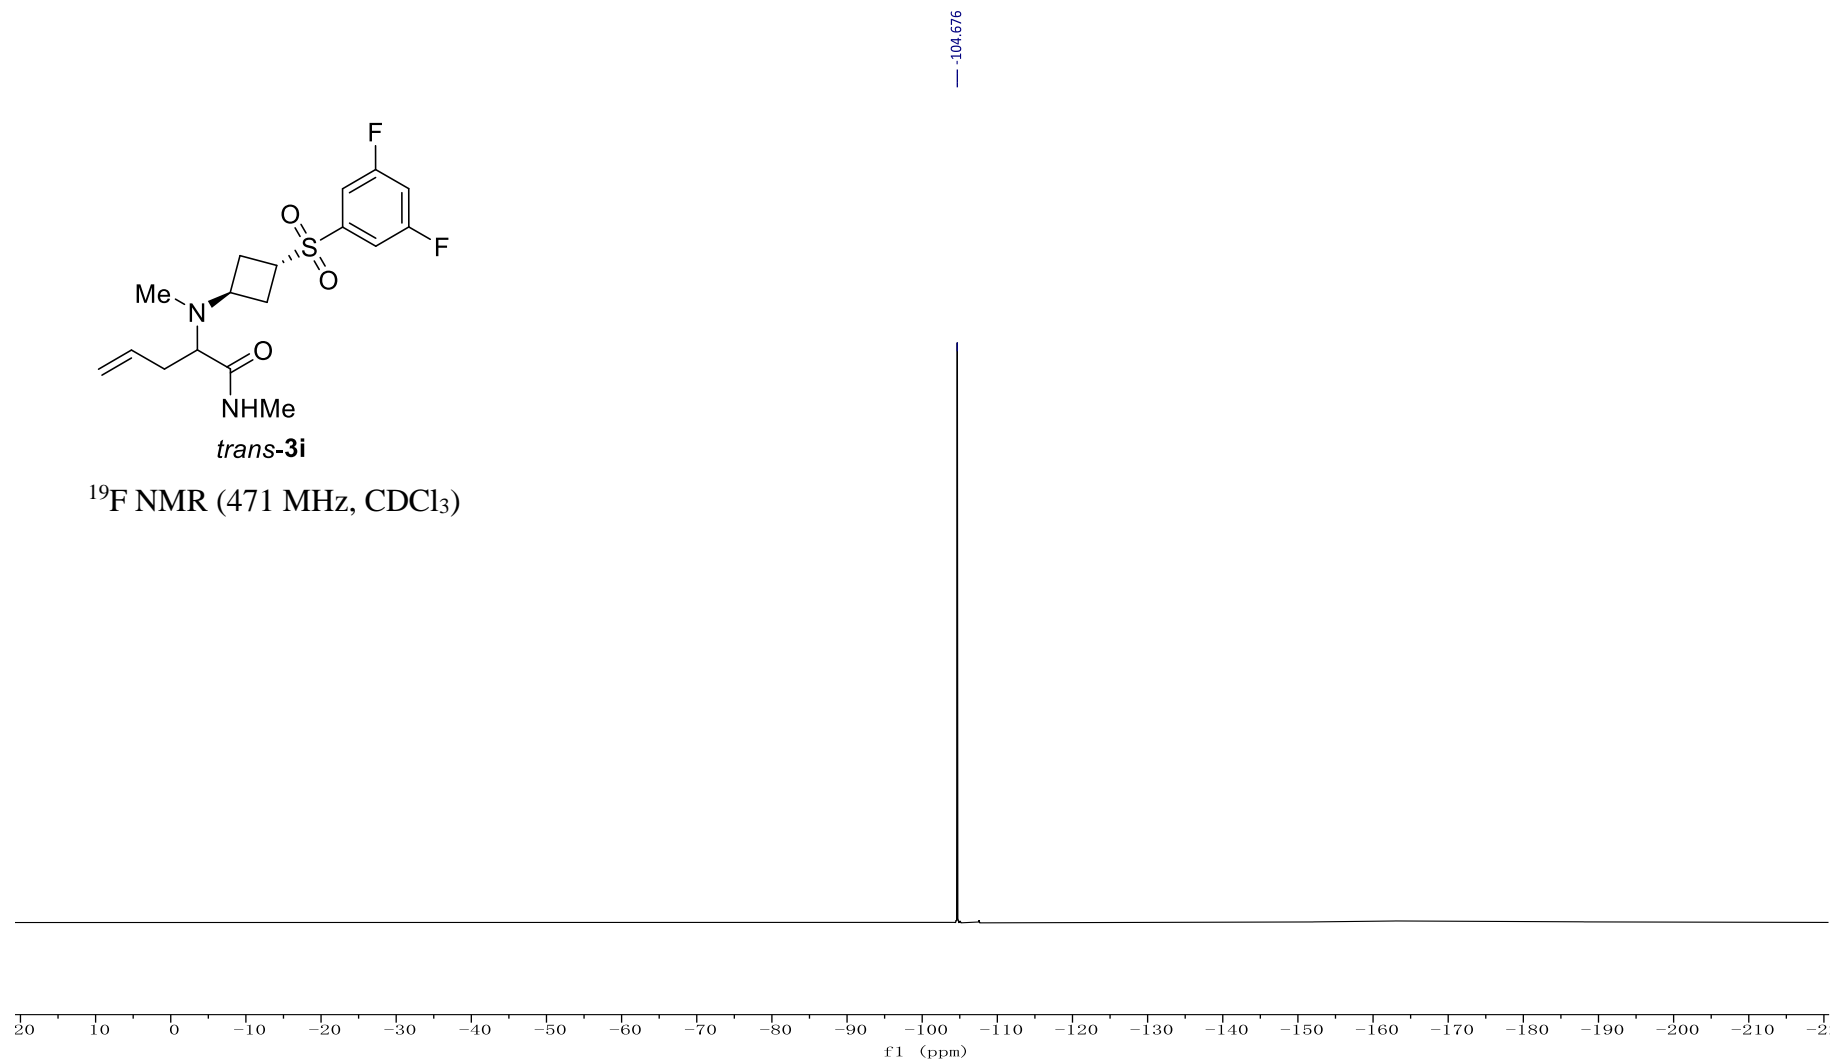

9.185  
7.626  
7.622  
7.619  
7.614  
7.606  
7.603  
7.600  
7.598  
7.413  
7.411  
7.408  
7.405  
7.401  
7.398  
7.395  
7.392  
7.361  
7.356  
7.348  
7.343  
7.335  
7.326  
7.321  
7.136  
7.133  
7.130  
7.126  
7.119  
7.115  
7.111  
7.105  
7.099  
7.096  
7.093  
7.084  
7.078  
5.927  
5.906  
5.163  
5.159  
5.156  
5.152  
5.121  
5.117  
5.113  
5.109  
5.069  
5.065  
5.062  
5.059  
5.044  
5.040  
5.037  
5.034  
3.534  
3.532  
3.512  
3.492  
3.490  
3.391  
3.370  
2.841  
2.805  
2.541  
2.532  
2.510  
2.482  
2.430  
2.420  
2.414  
2.410  
2.401  
2.394  
2.391  
2.382  
2.377  
2.370  
2.361  
2.353  
2.350  
2.328  
2.315  
0.000

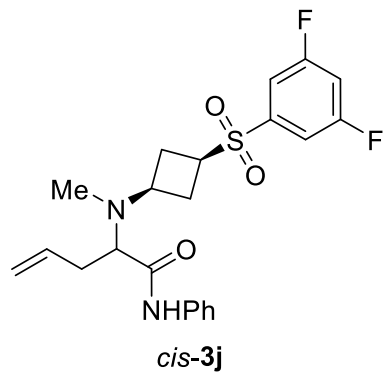

<sup>1</sup>H NMR (400 MHz, CDCl<sub>3</sub>)

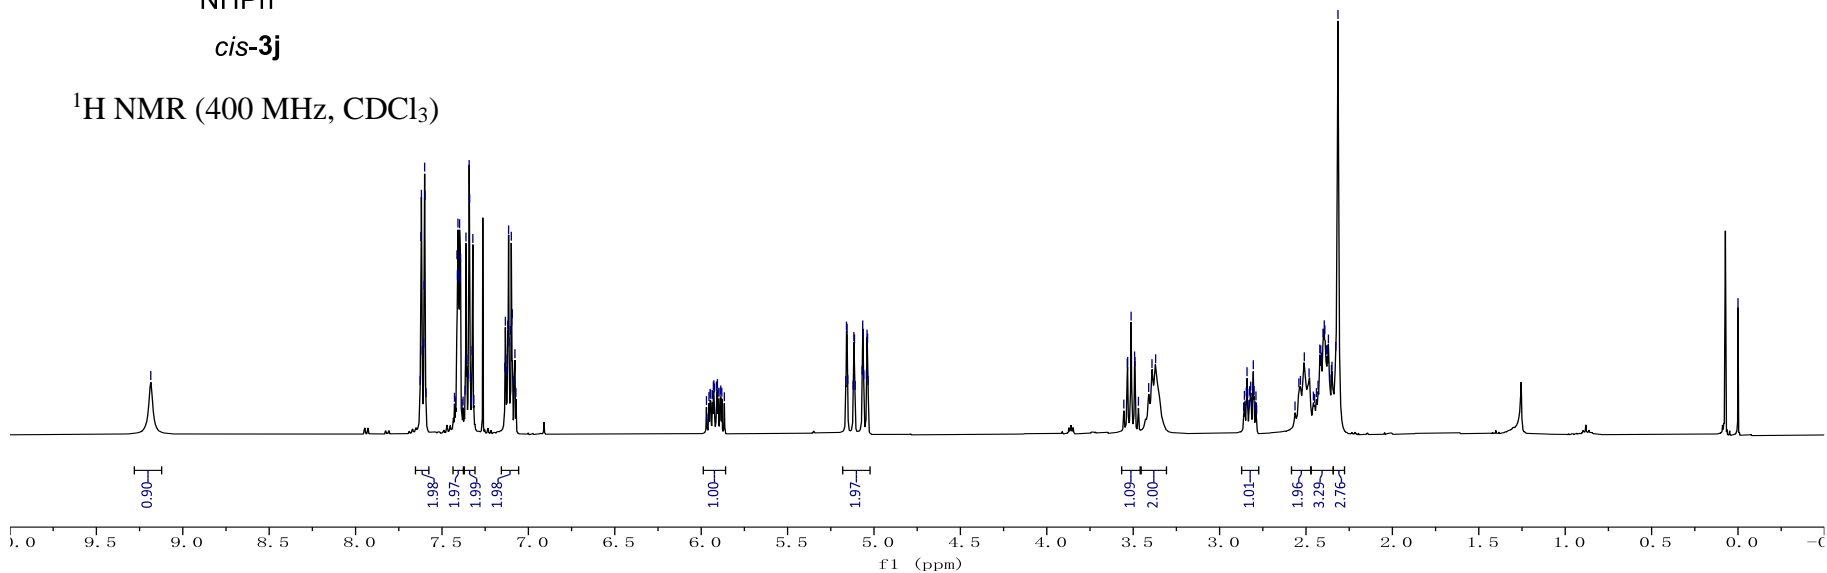

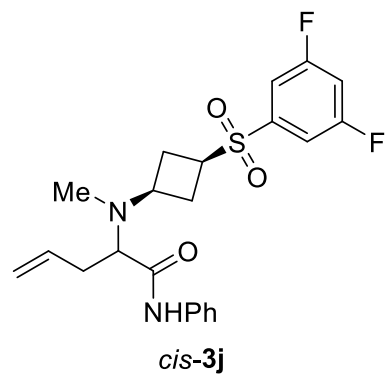

$^{13}\text{C}$  NMR (100 MHz,  $\text{CDCl}_3$ )

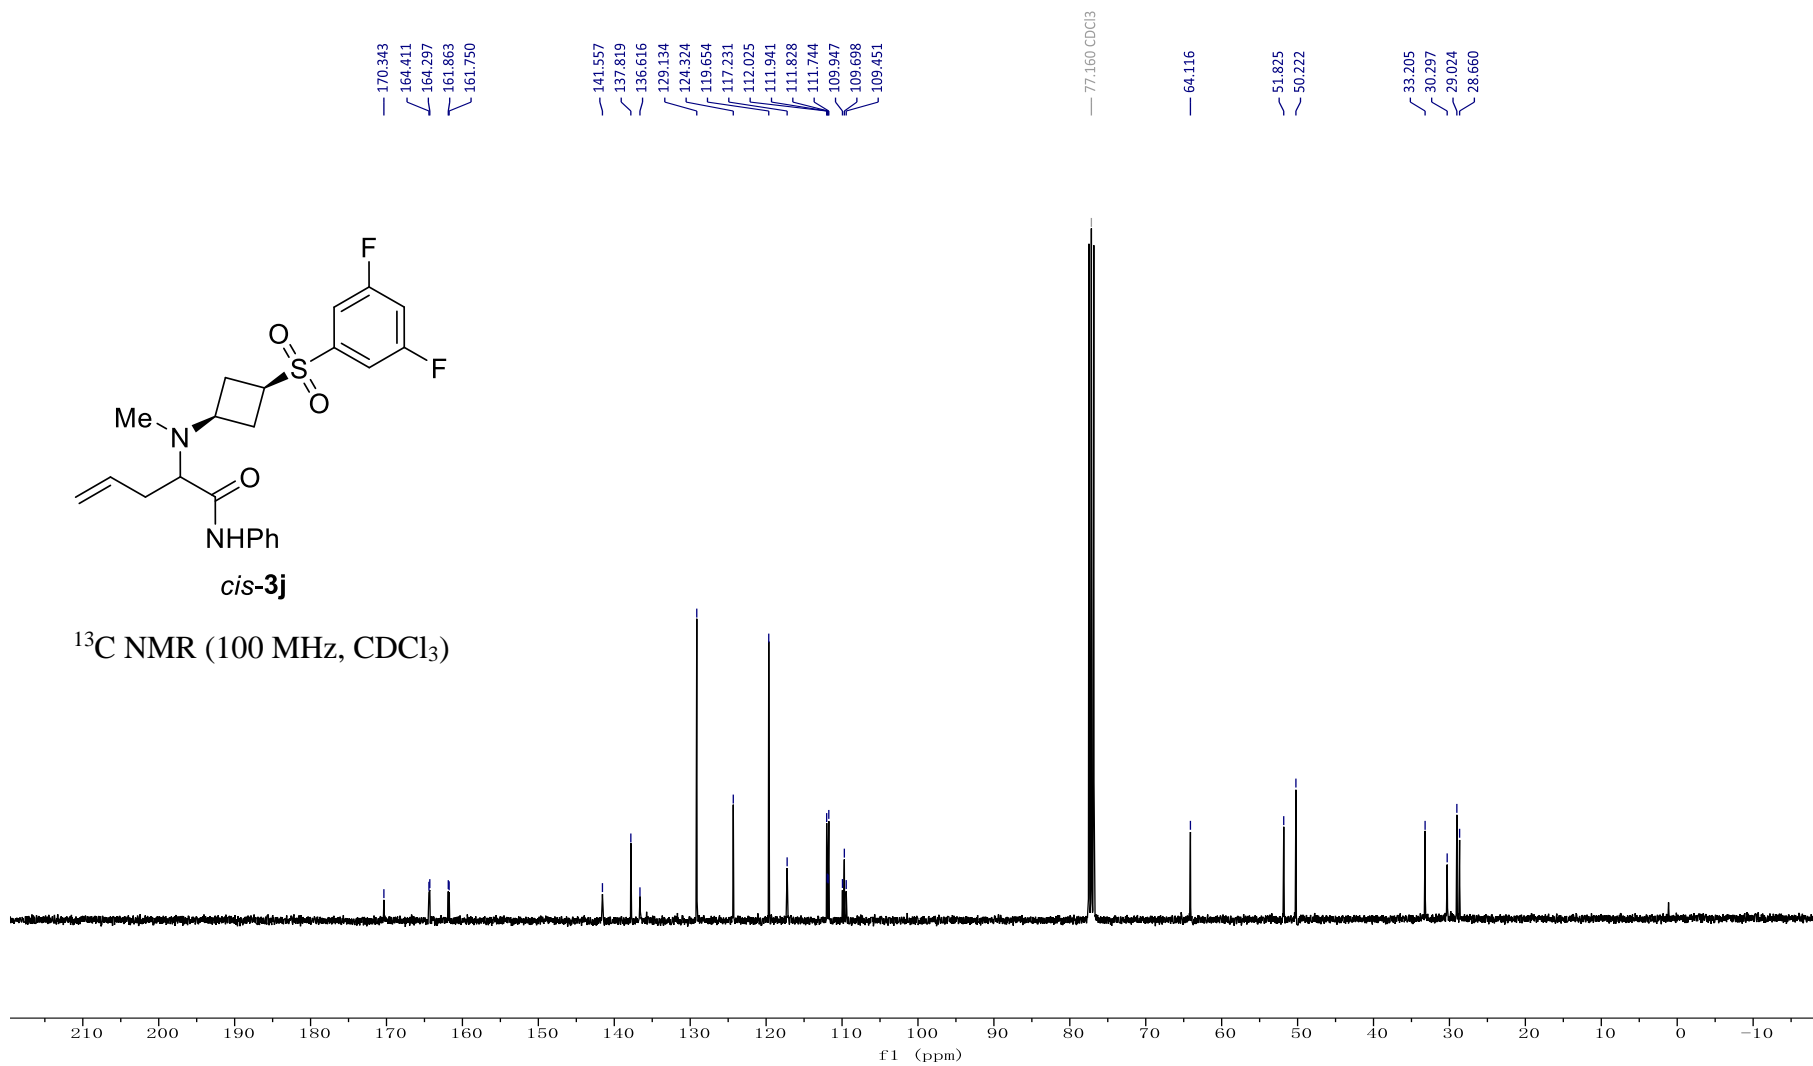

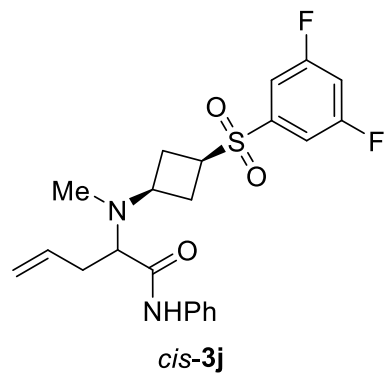

$^{19}\text{F}$  NMR (376 MHz,  $\text{CDCl}_3$ )

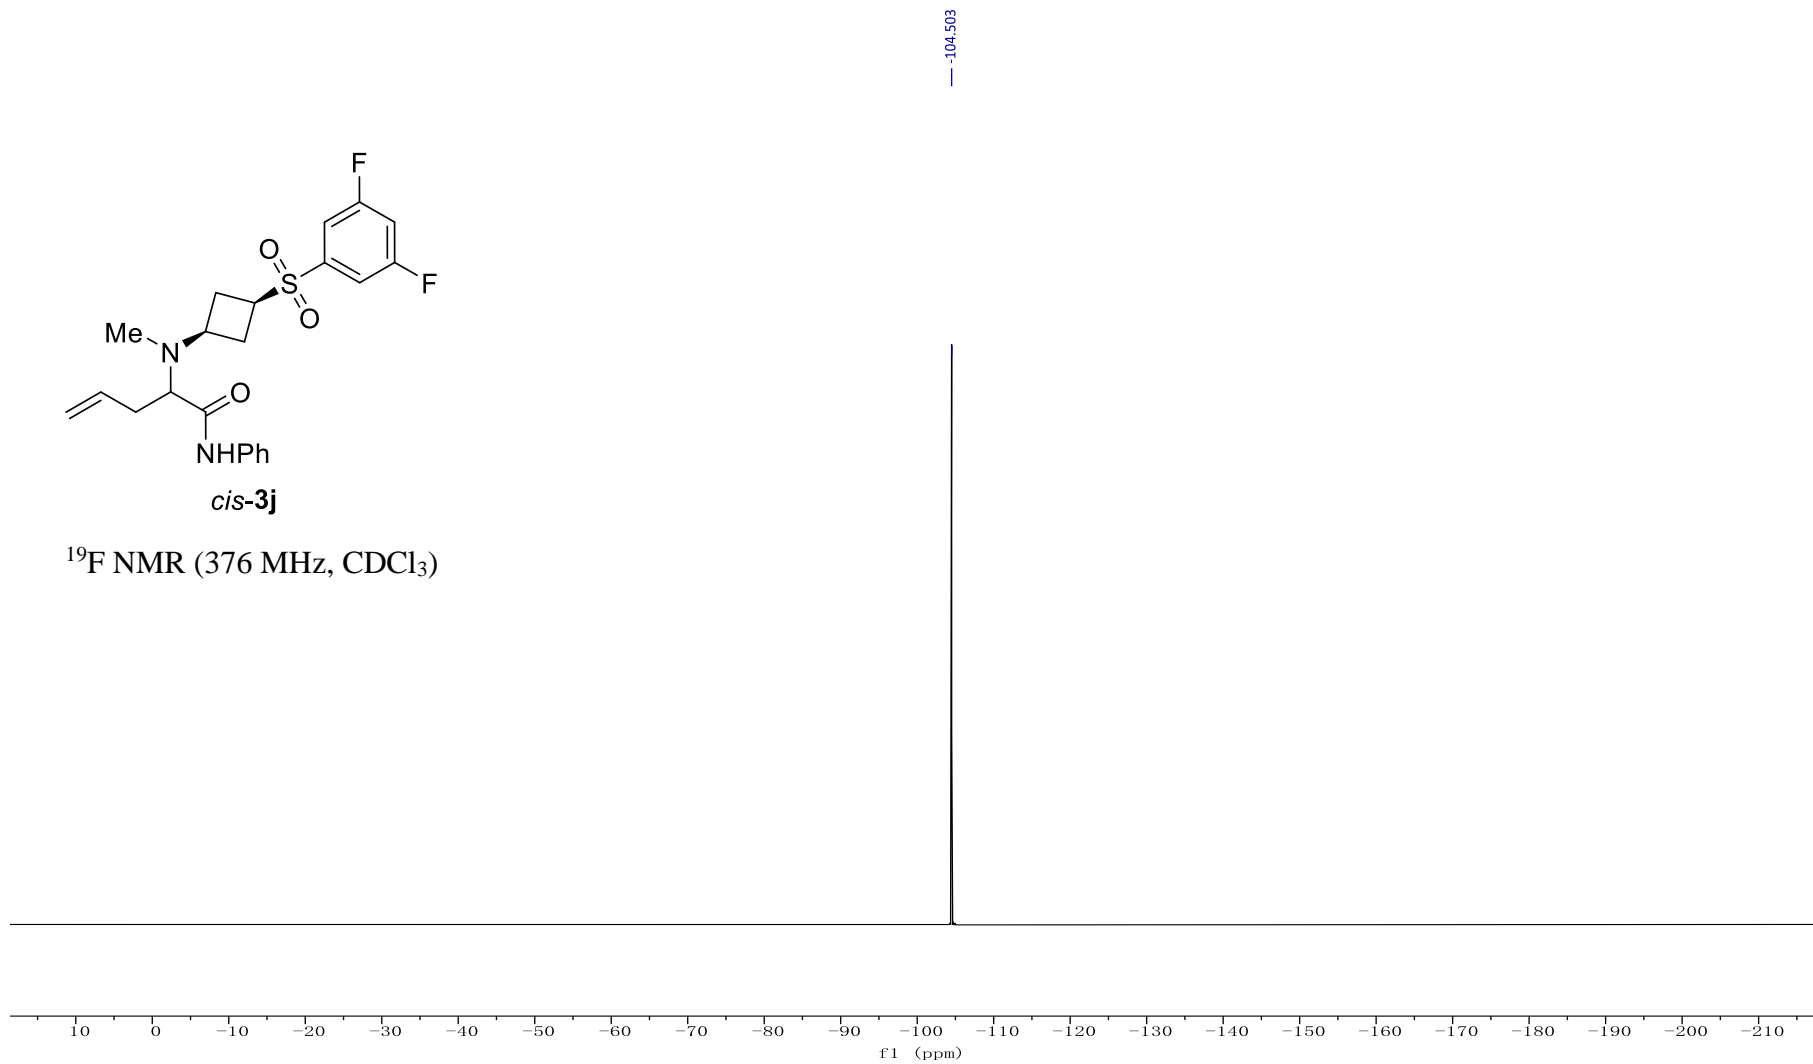



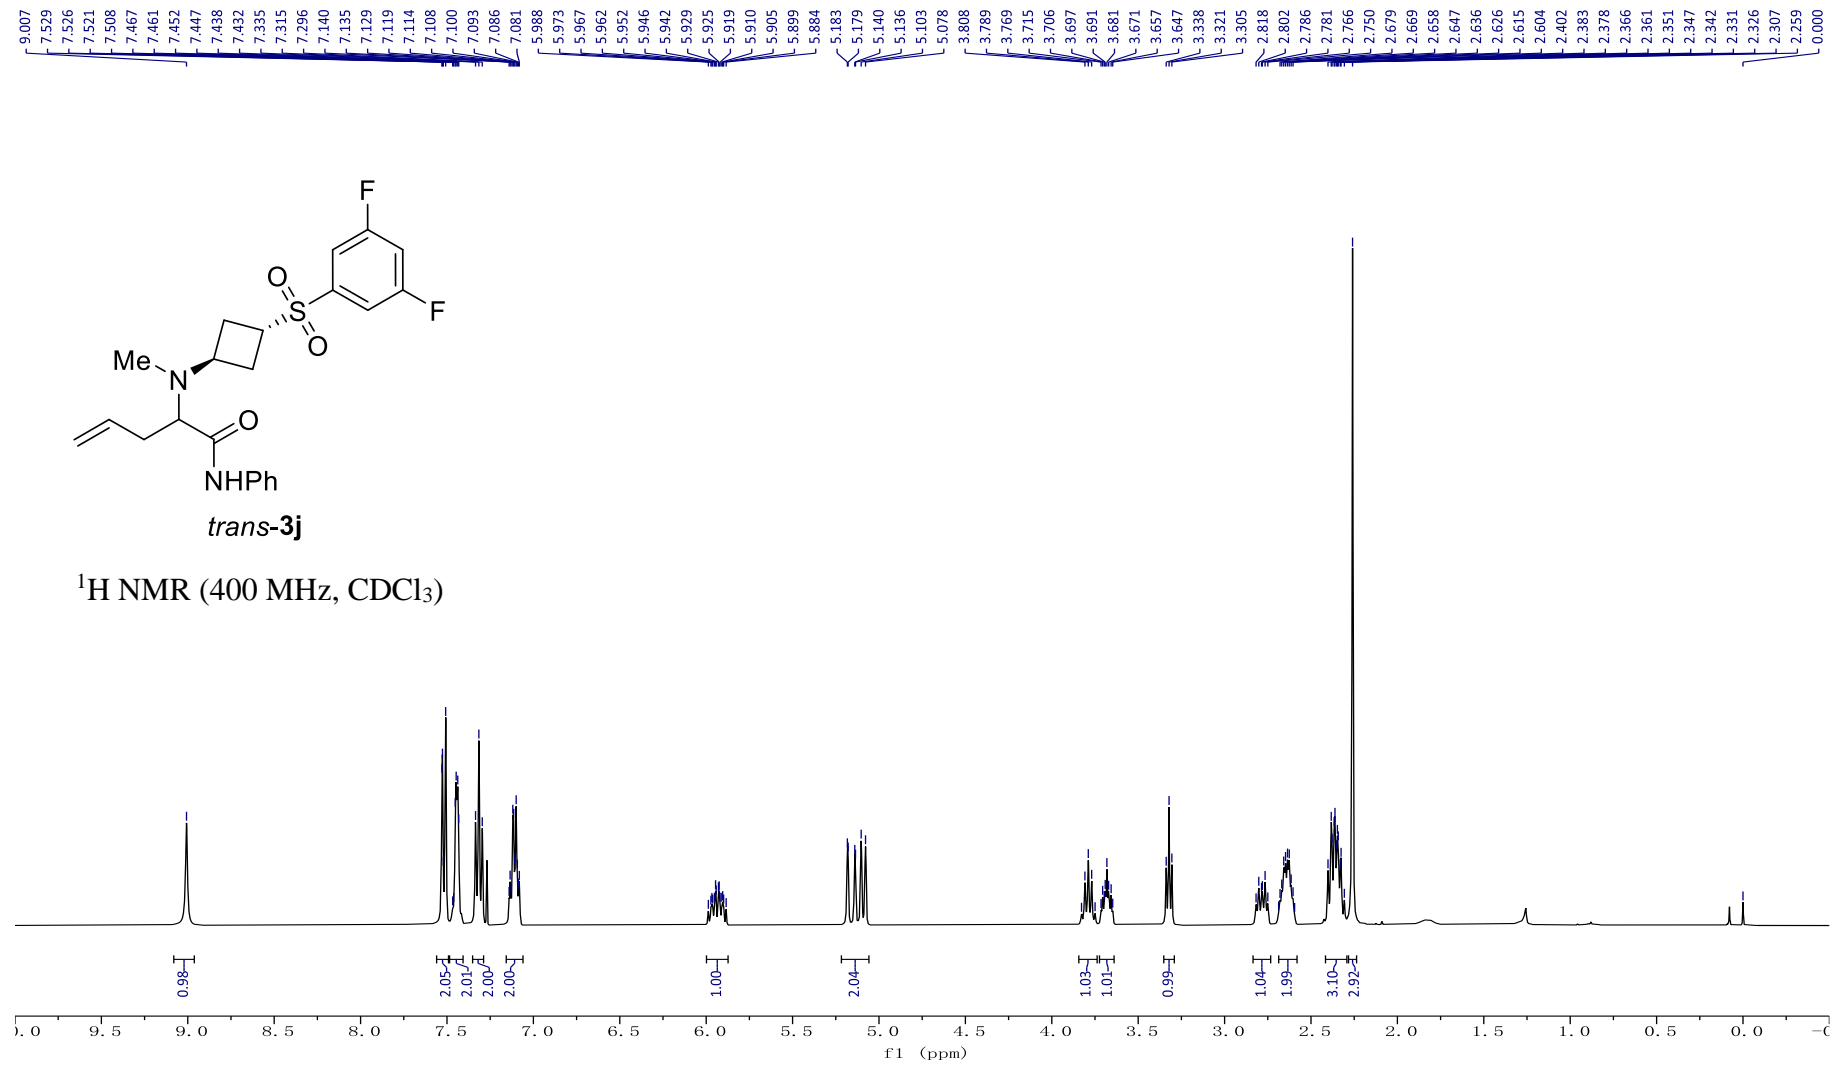

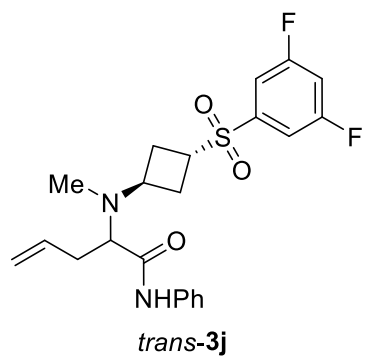

$^{13}\text{C}$  NMR (100 MHz,  $\text{CDCl}_3$ )

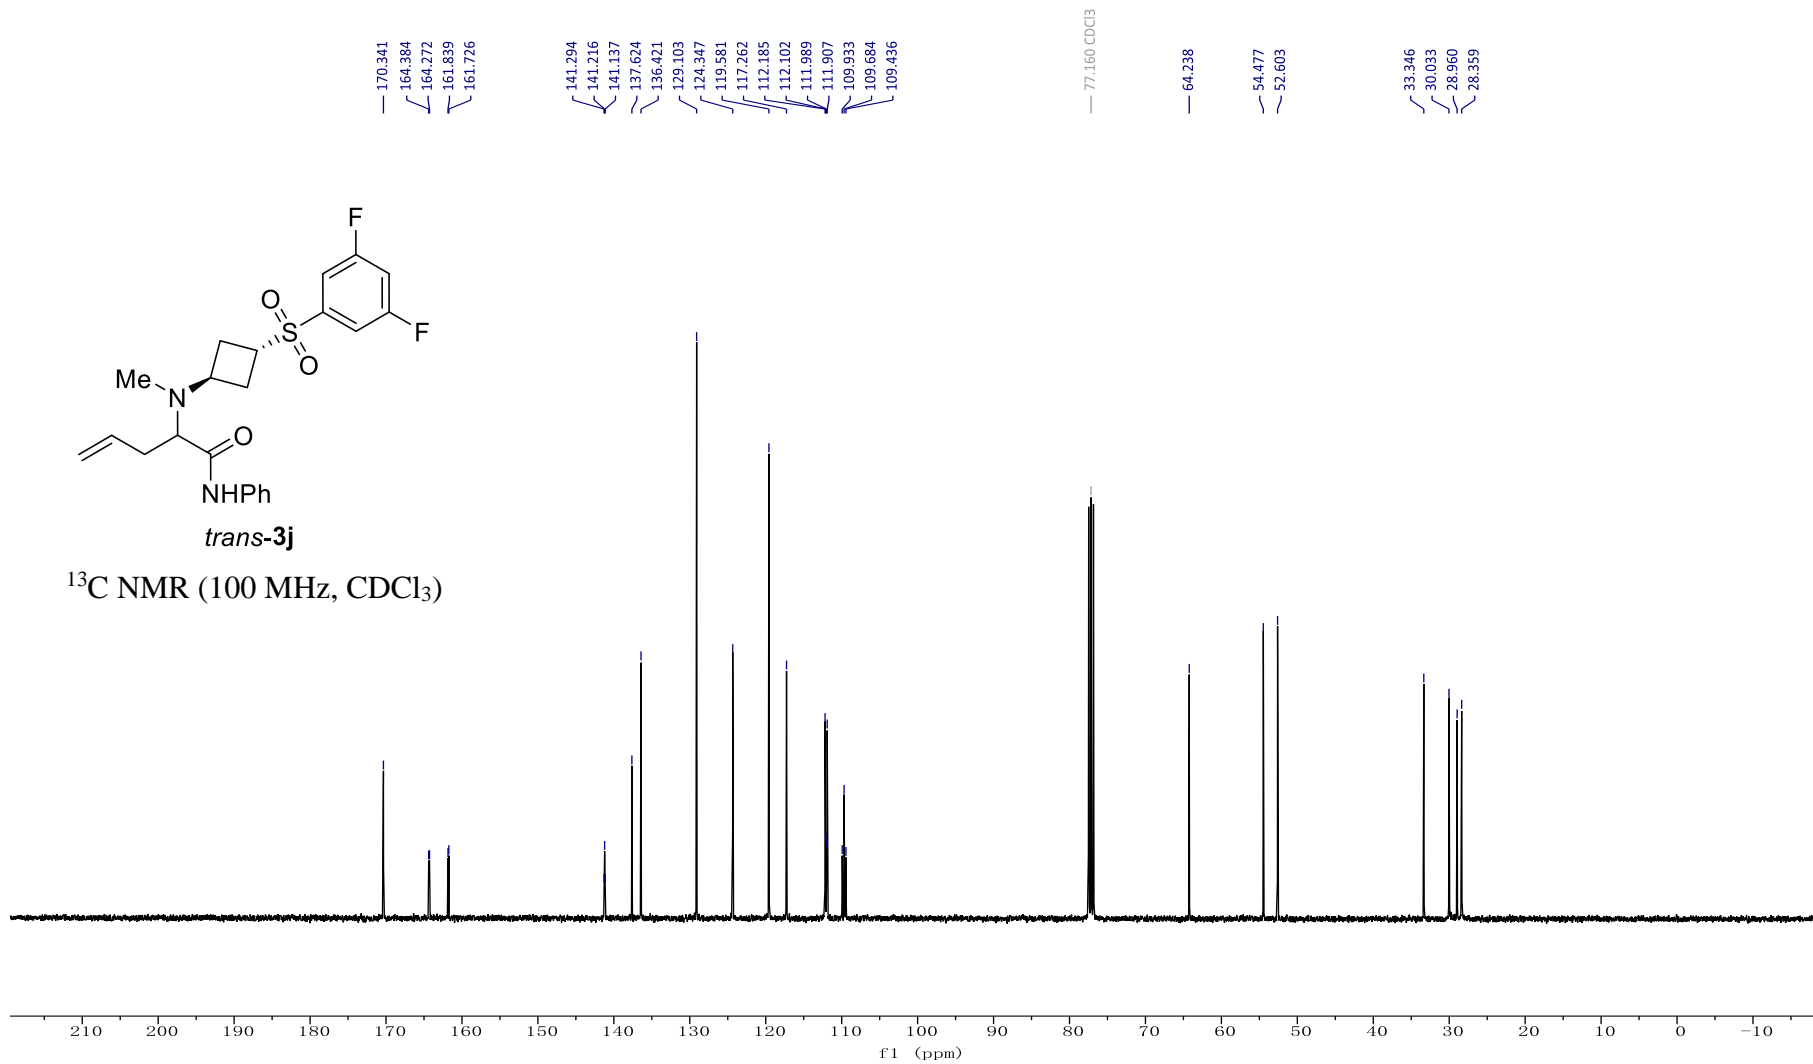

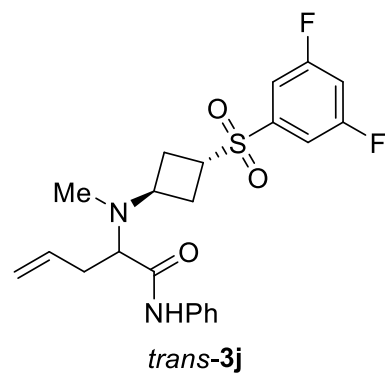

$^{19}\text{F}$  NMR (376 MHz,  $\text{CDCl}_3$ )

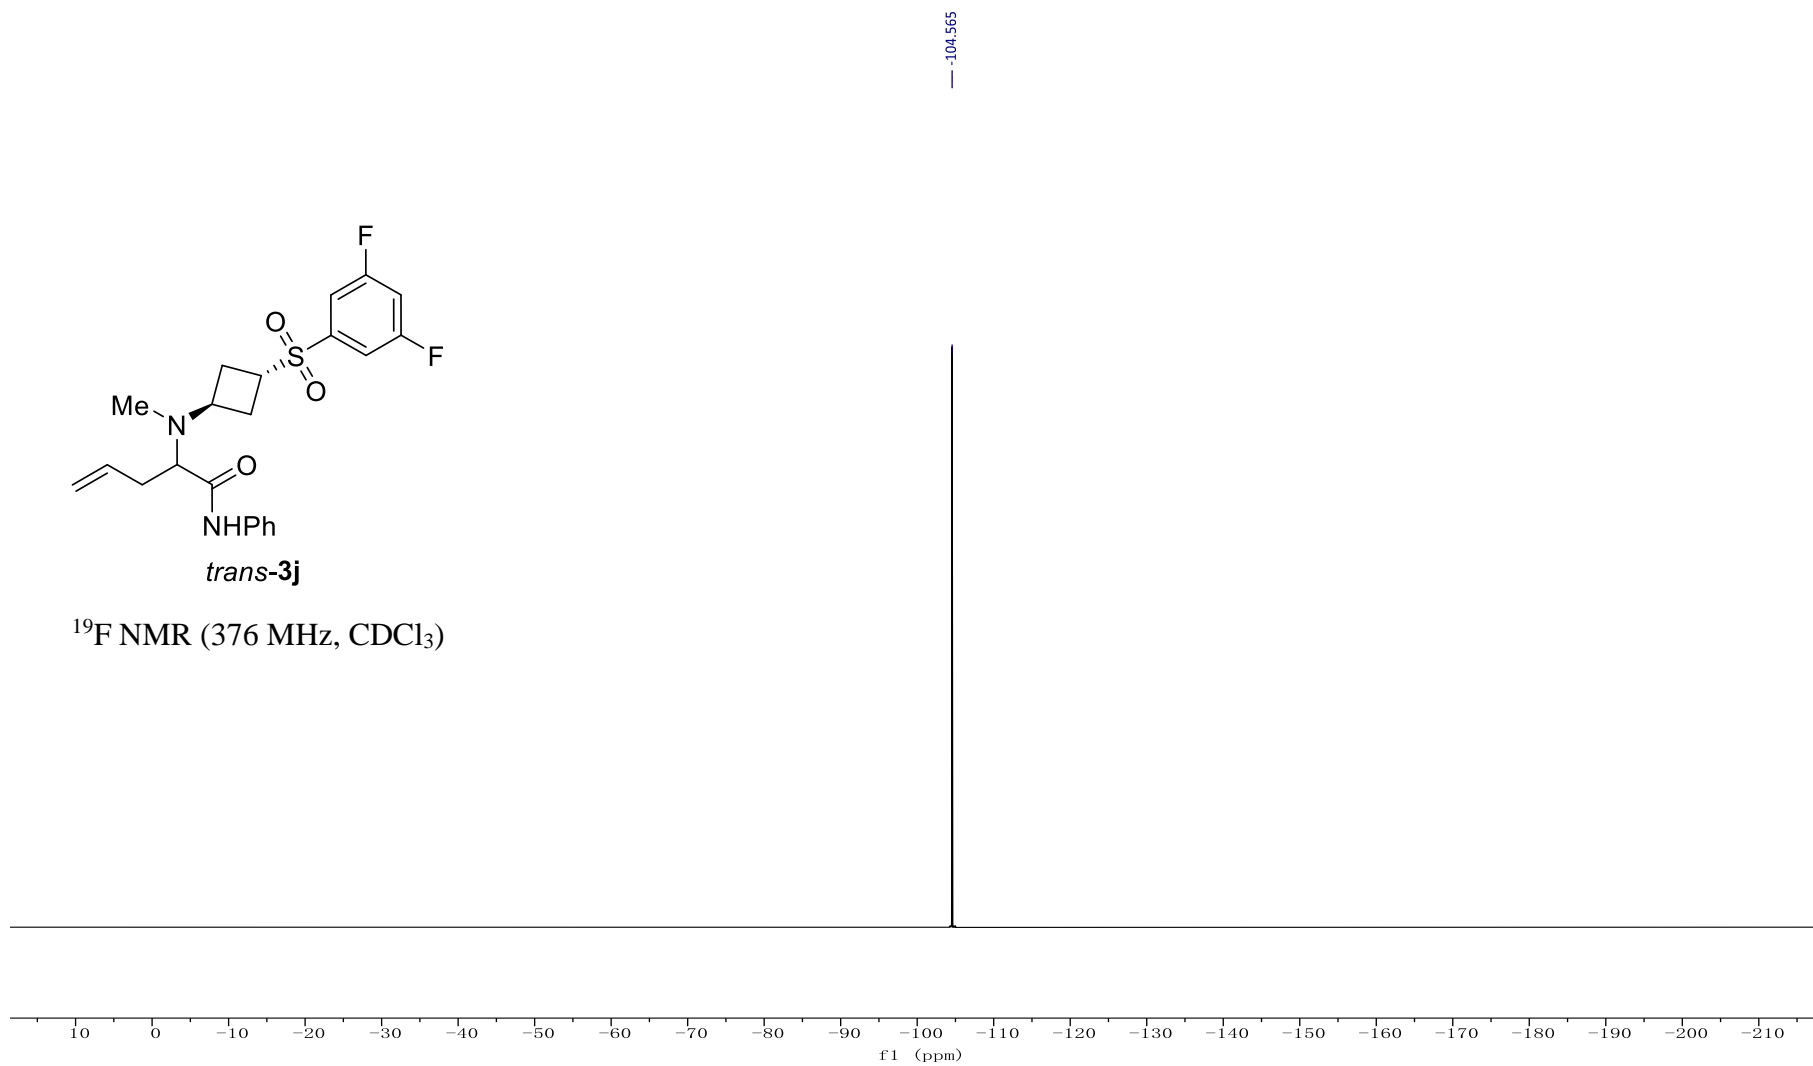

7.414  
7.408  
7.402  
7.398  
7.393  
7.122  
7.107  
7.101  
7.095  
7.080  
5.747  
5.730  
5.081  
5.077  
5.073  
5.069  
5.038  
5.034  
5.030  
5.026  
5.016  
5.011  
4.991  
4.986  
3.759  
3.753  
3.597  
3.562  
3.533  
3.521  
3.510  
3.498  
3.432  
3.427  
3.413  
3.408  
3.389  
3.384  
3.342  
3.336  
3.332  
3.322  
3.312  
3.303  
3.295  
3.290  
3.279  
3.278  
2.578  
2.564  
2.560  
2.556  
2.556  
2.538  
2.530  
2.512  
2.512  
2.506  
2.484  
2.474  
2.467  
2.449  
2.444  
2.299  
2.273  
2.262  
2.255  
2.244  
2.226  
2.215  
2.210  
2.197  
1.695  
1.682  
1.628  
1.616  
1.606  
1.601  
1.595  
1.589  
1.584  
1.577  
1.566  
1.552  
1.544  
1.495  
1.484  
-0.000

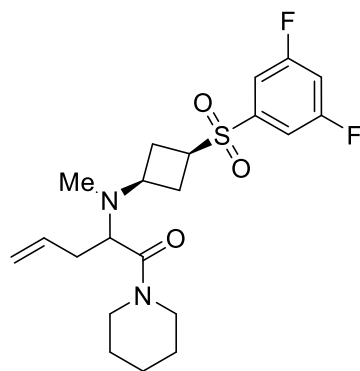

*cis-3k*

$^1\text{H NMR}$  (400 MHz,  $\text{CDCl}_3$ )

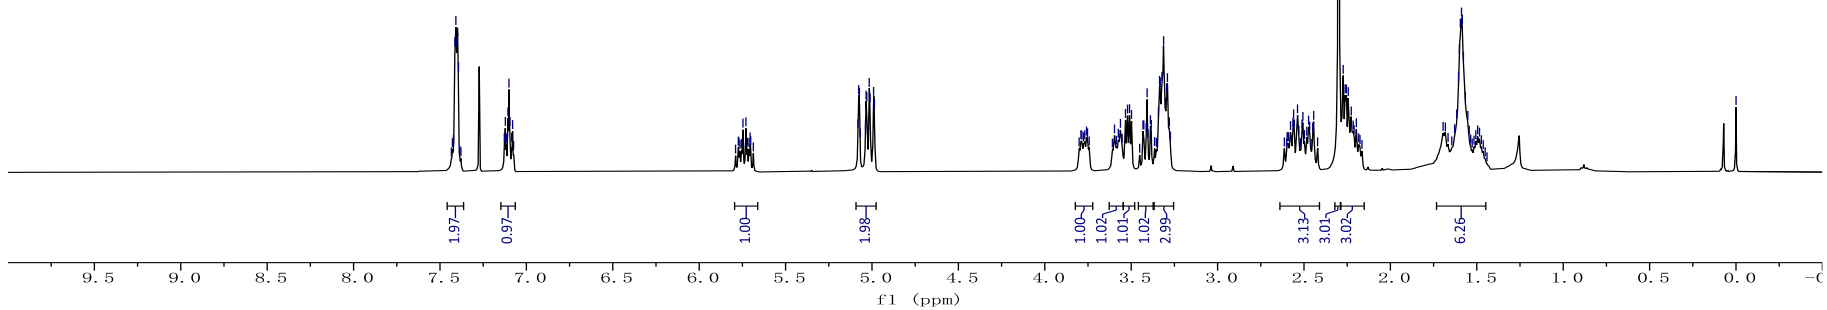

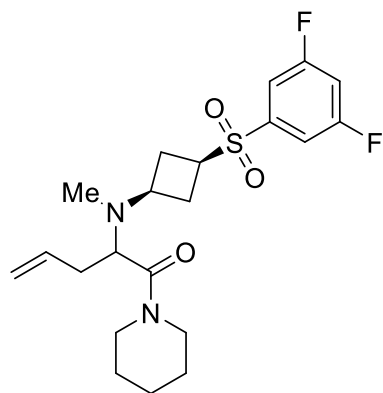

*cis-3k*

$^{13}\text{C}$  NMR (100 MHz,  $\text{CDCl}_3$ )

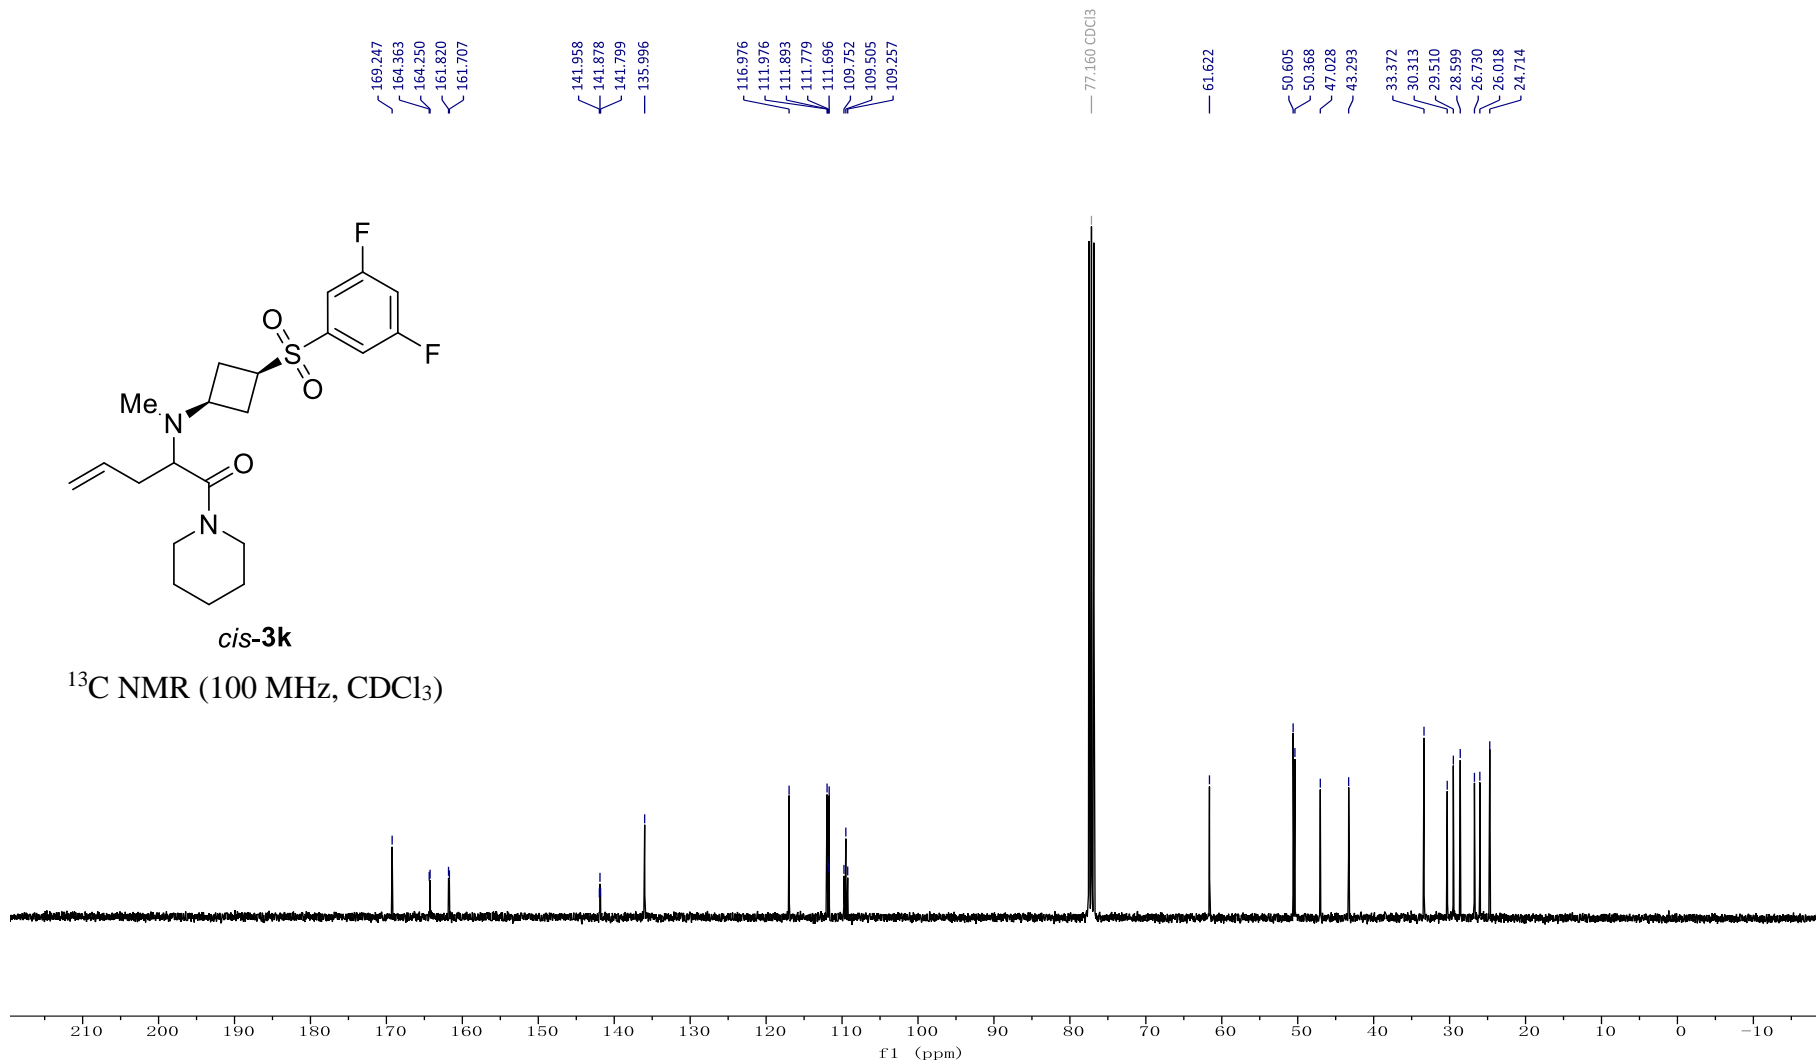

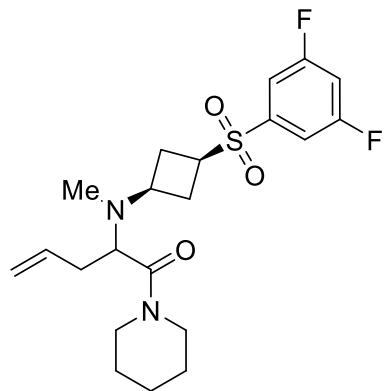

*cis-3k*

<sup>19</sup>F NMR (376 MHz, CDCl<sub>3</sub>)

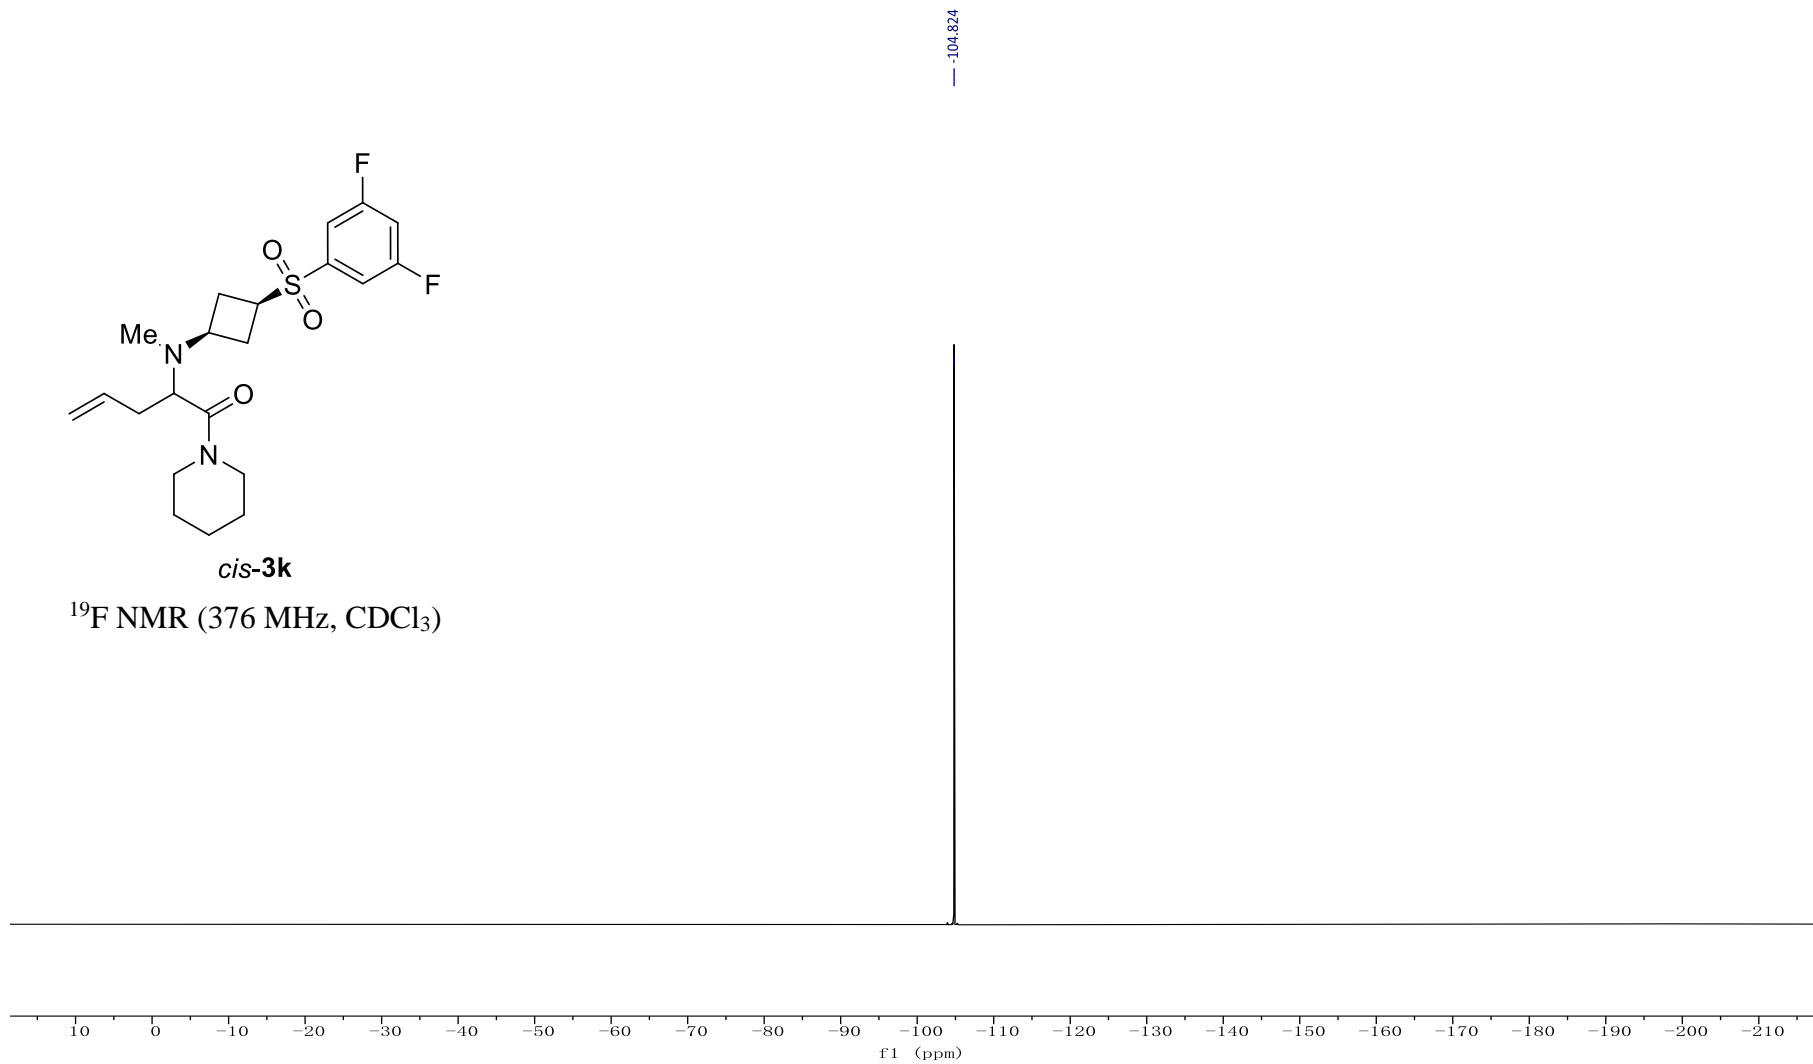

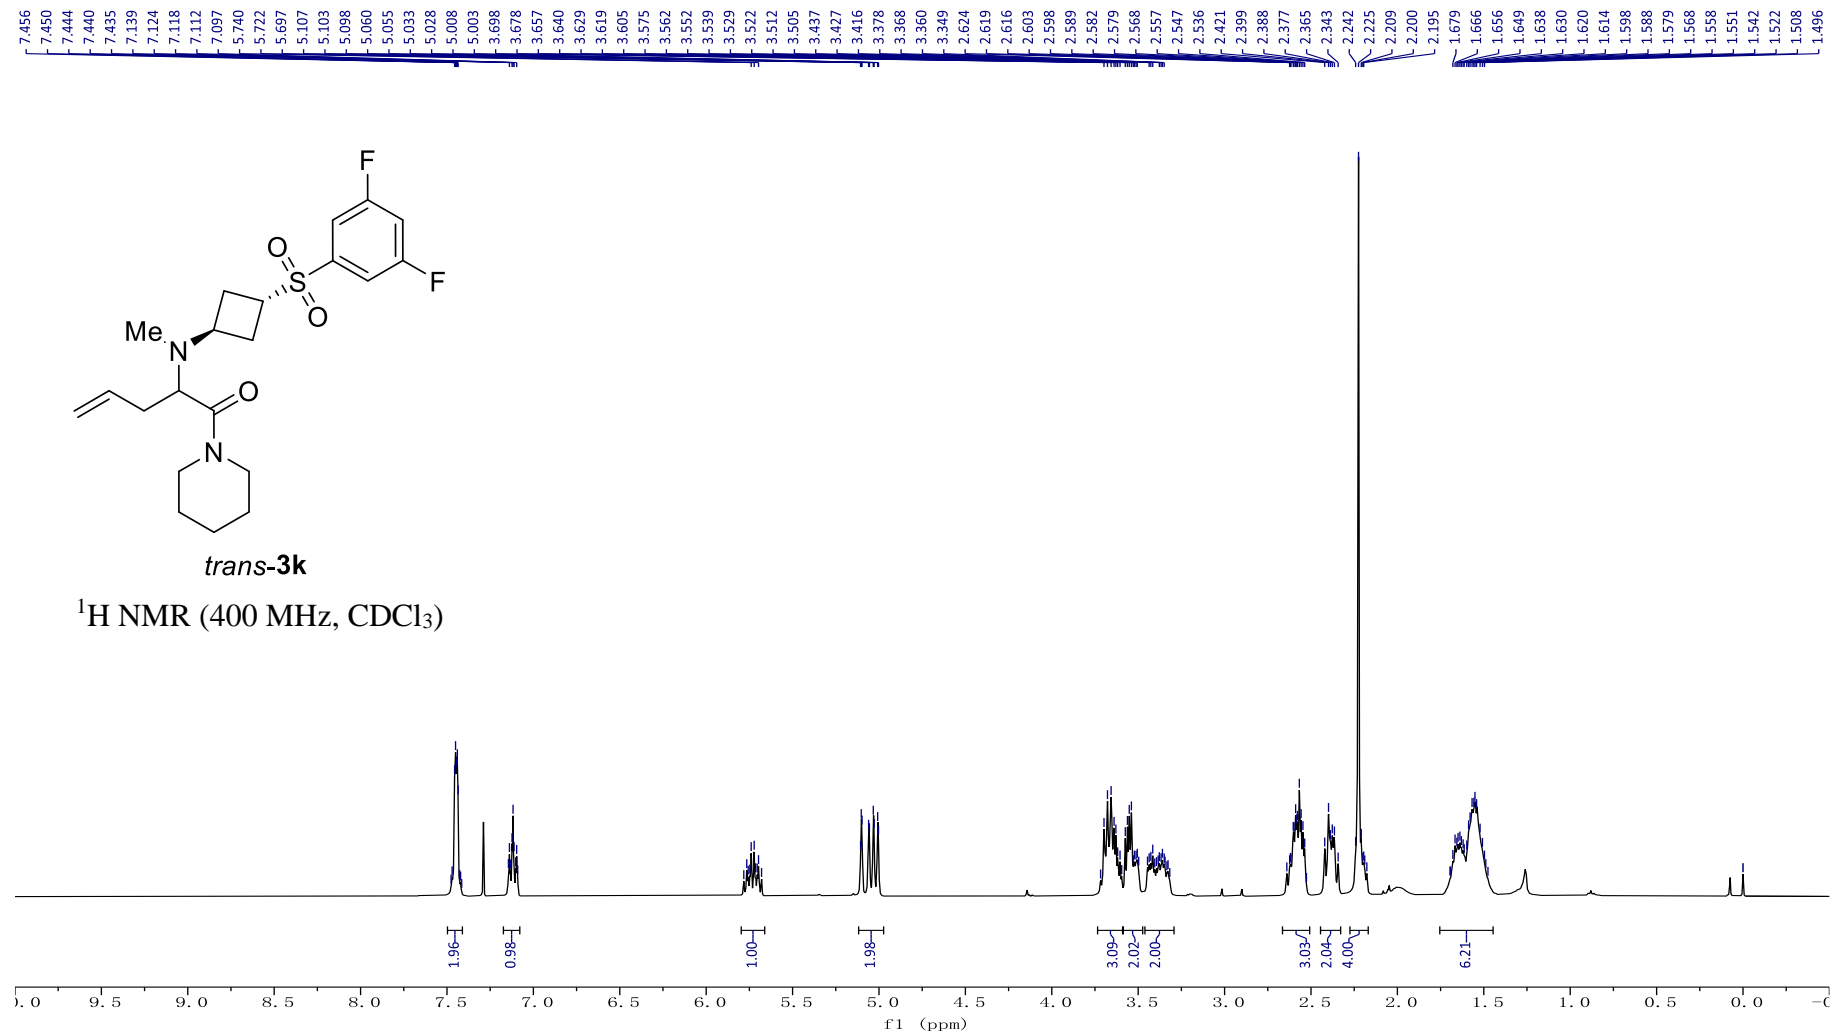

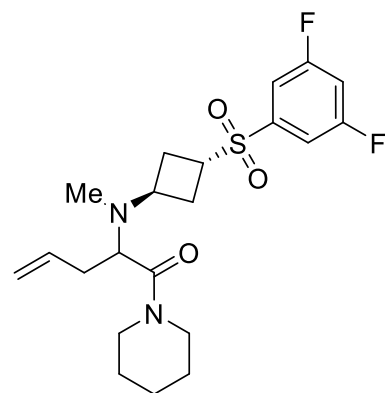

*trans-3k*

$^{13}\text{C}$  NMR (100 MHz,  $\text{CDCl}_3$ )

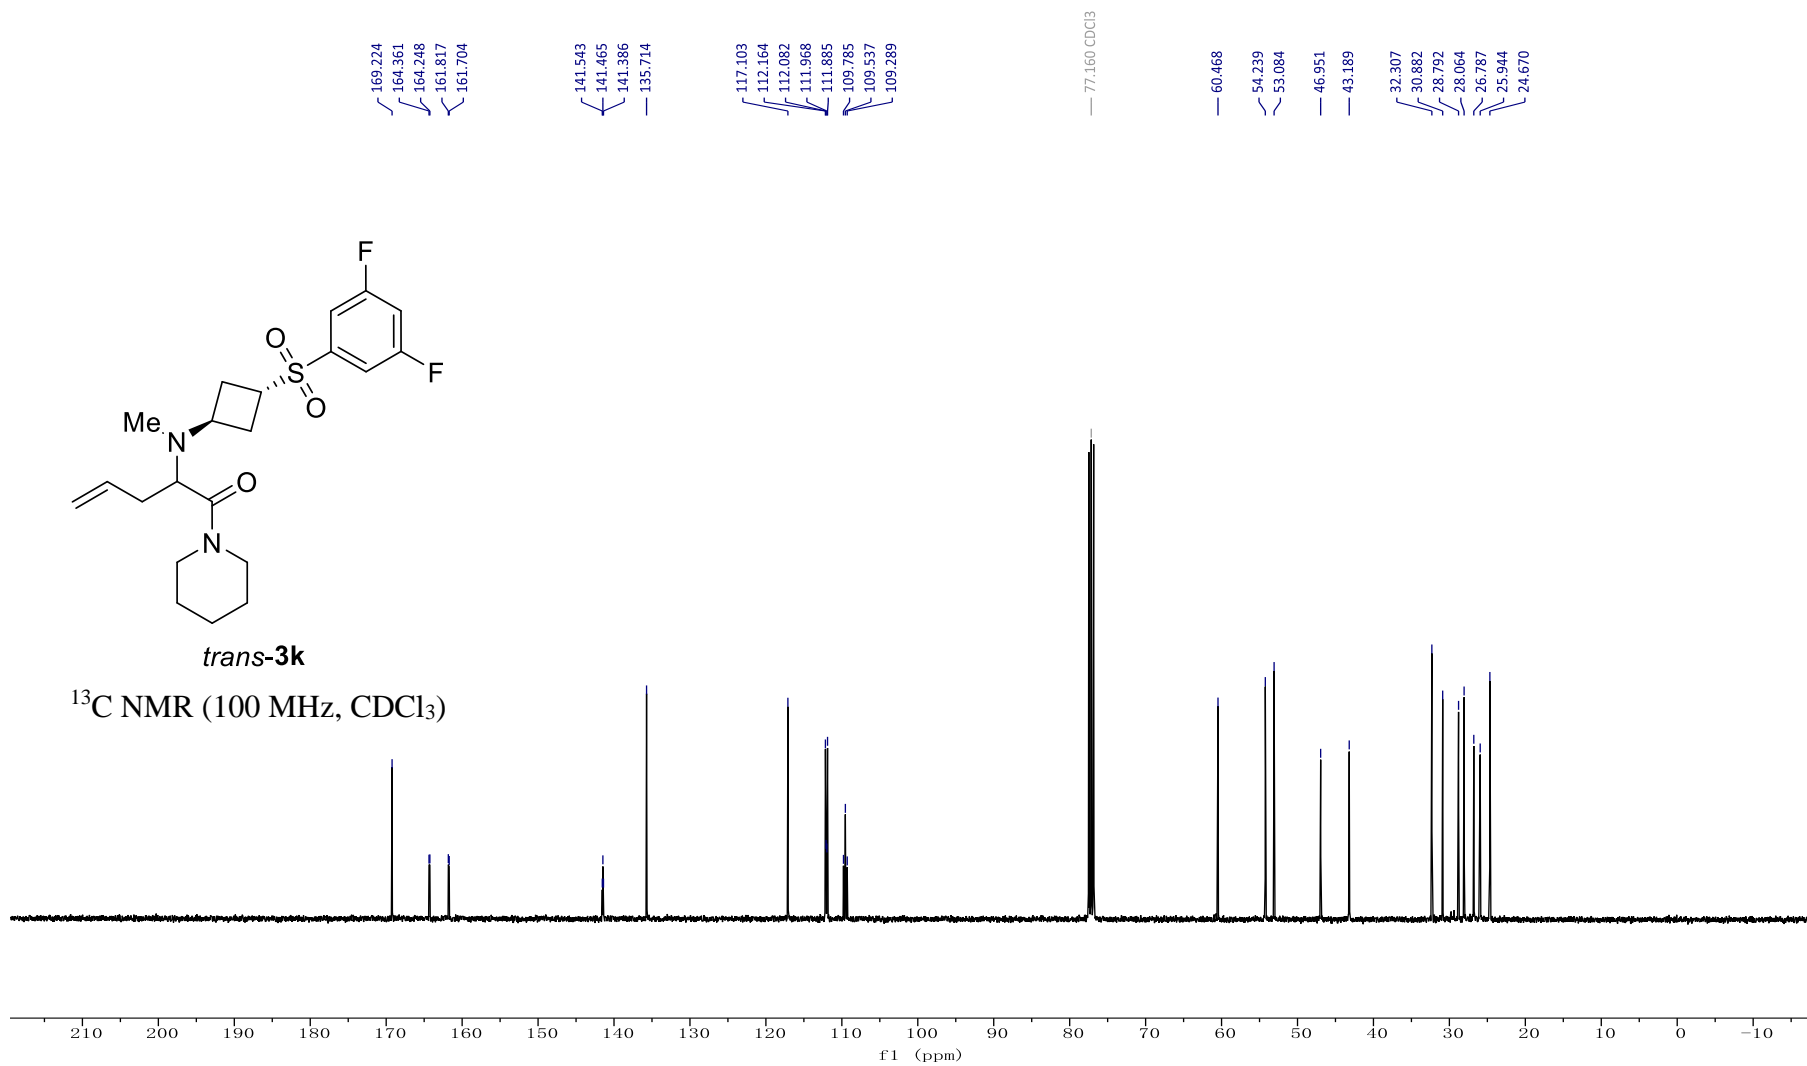



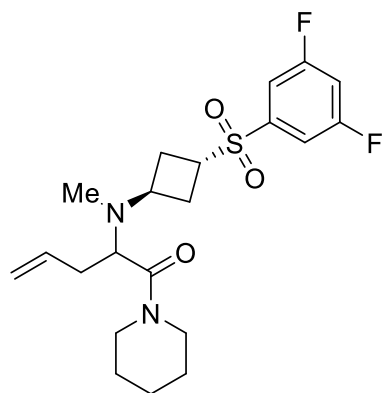

*trans-3k*

<sup>19</sup>F NMR (376 MHz, CDCl<sub>3</sub>)

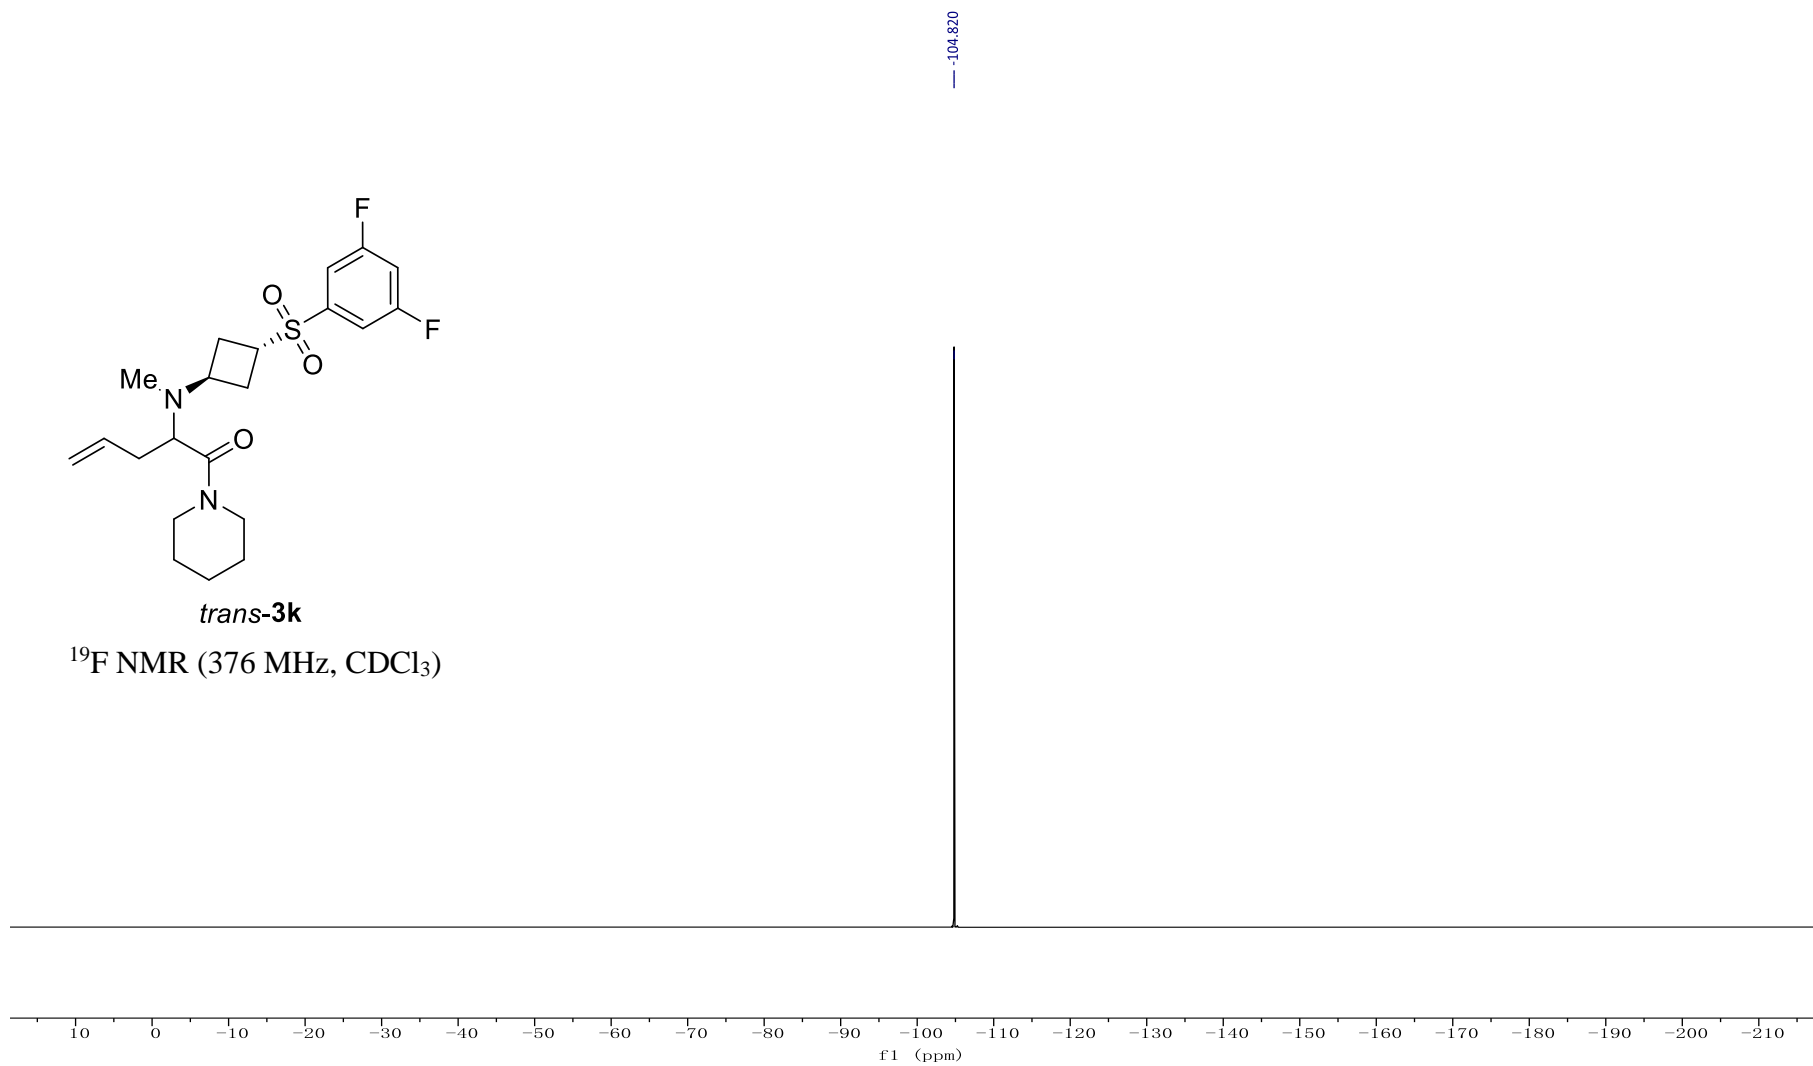

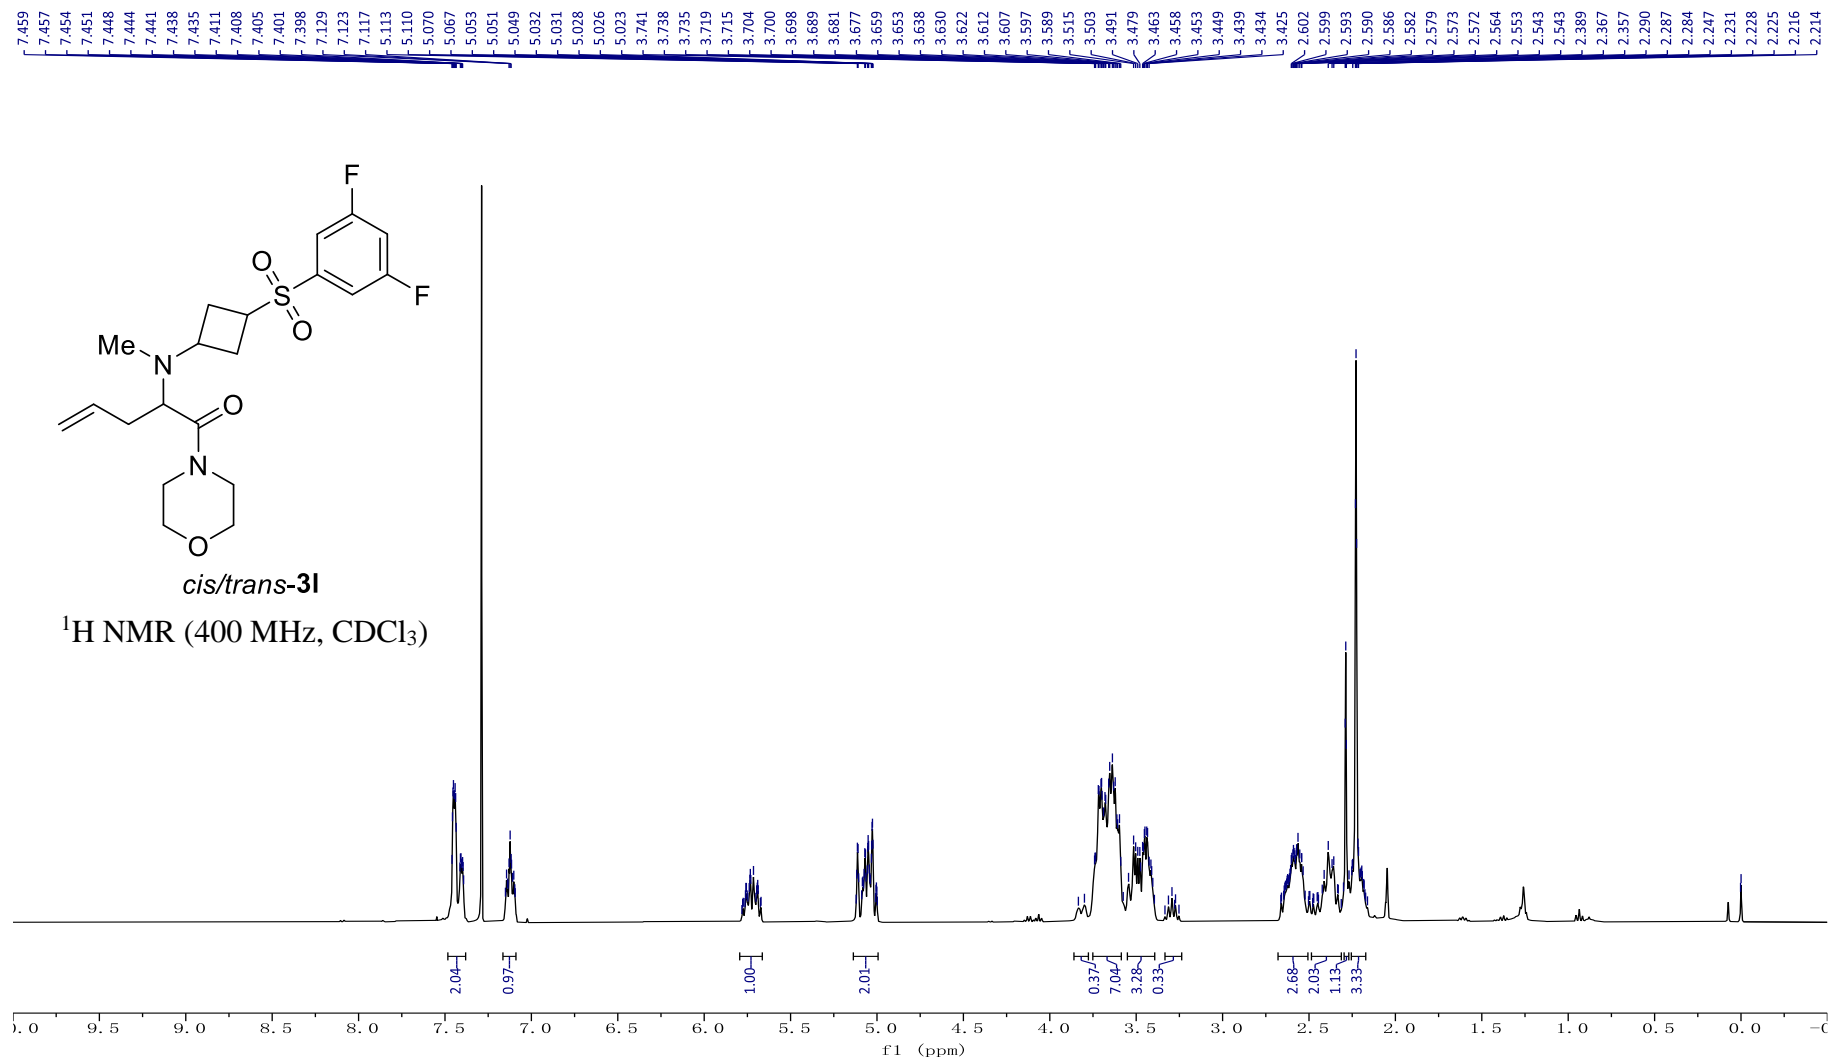

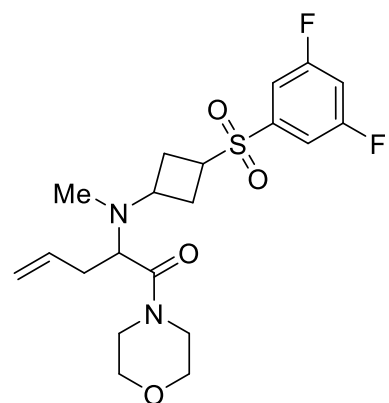

*cis/trans-3I*

$^{13}\text{C}$  NMR (100 MHz,  $\text{CDCl}_3$ )

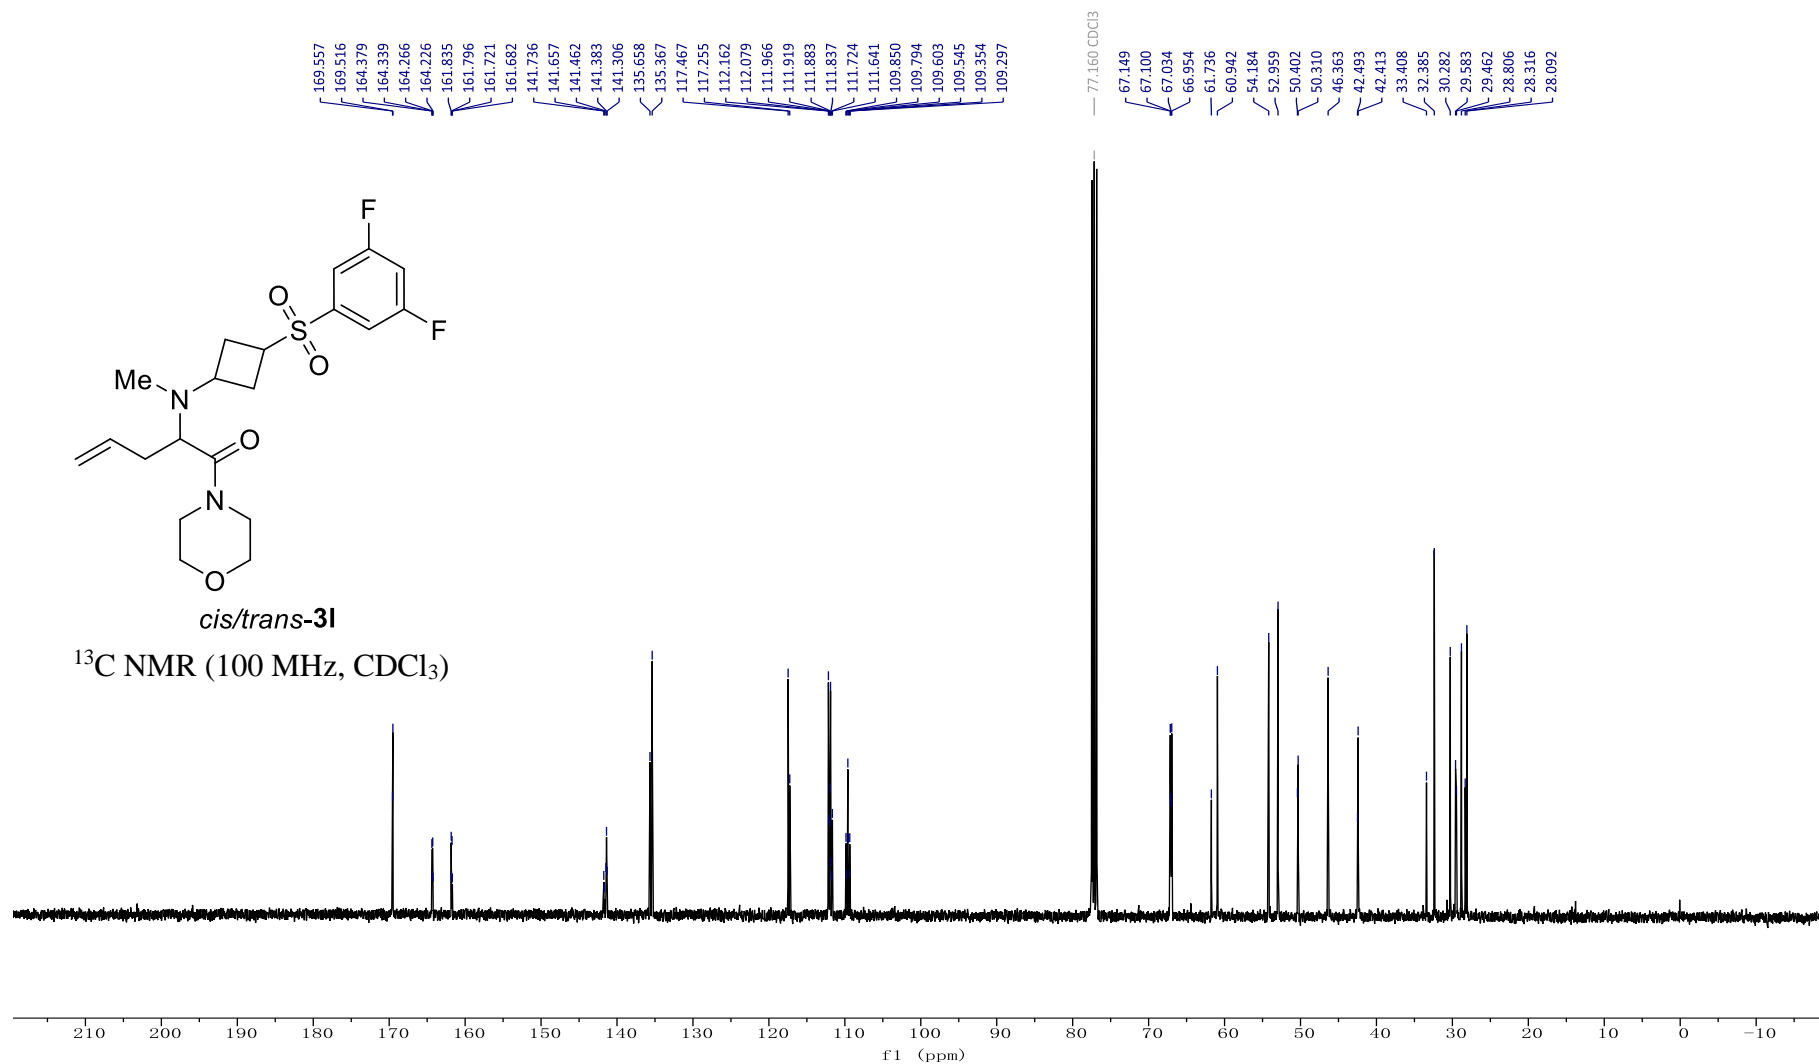

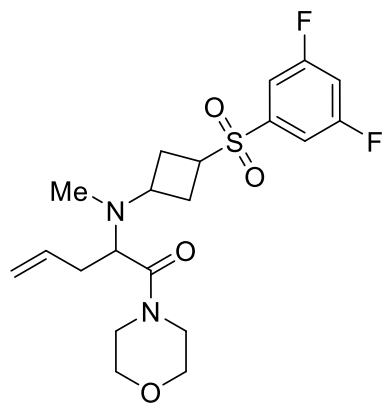

*cis/trans-31*

$^{19}\text{F}$  NMR (376 MHz,  $\text{CDCl}_3$ )

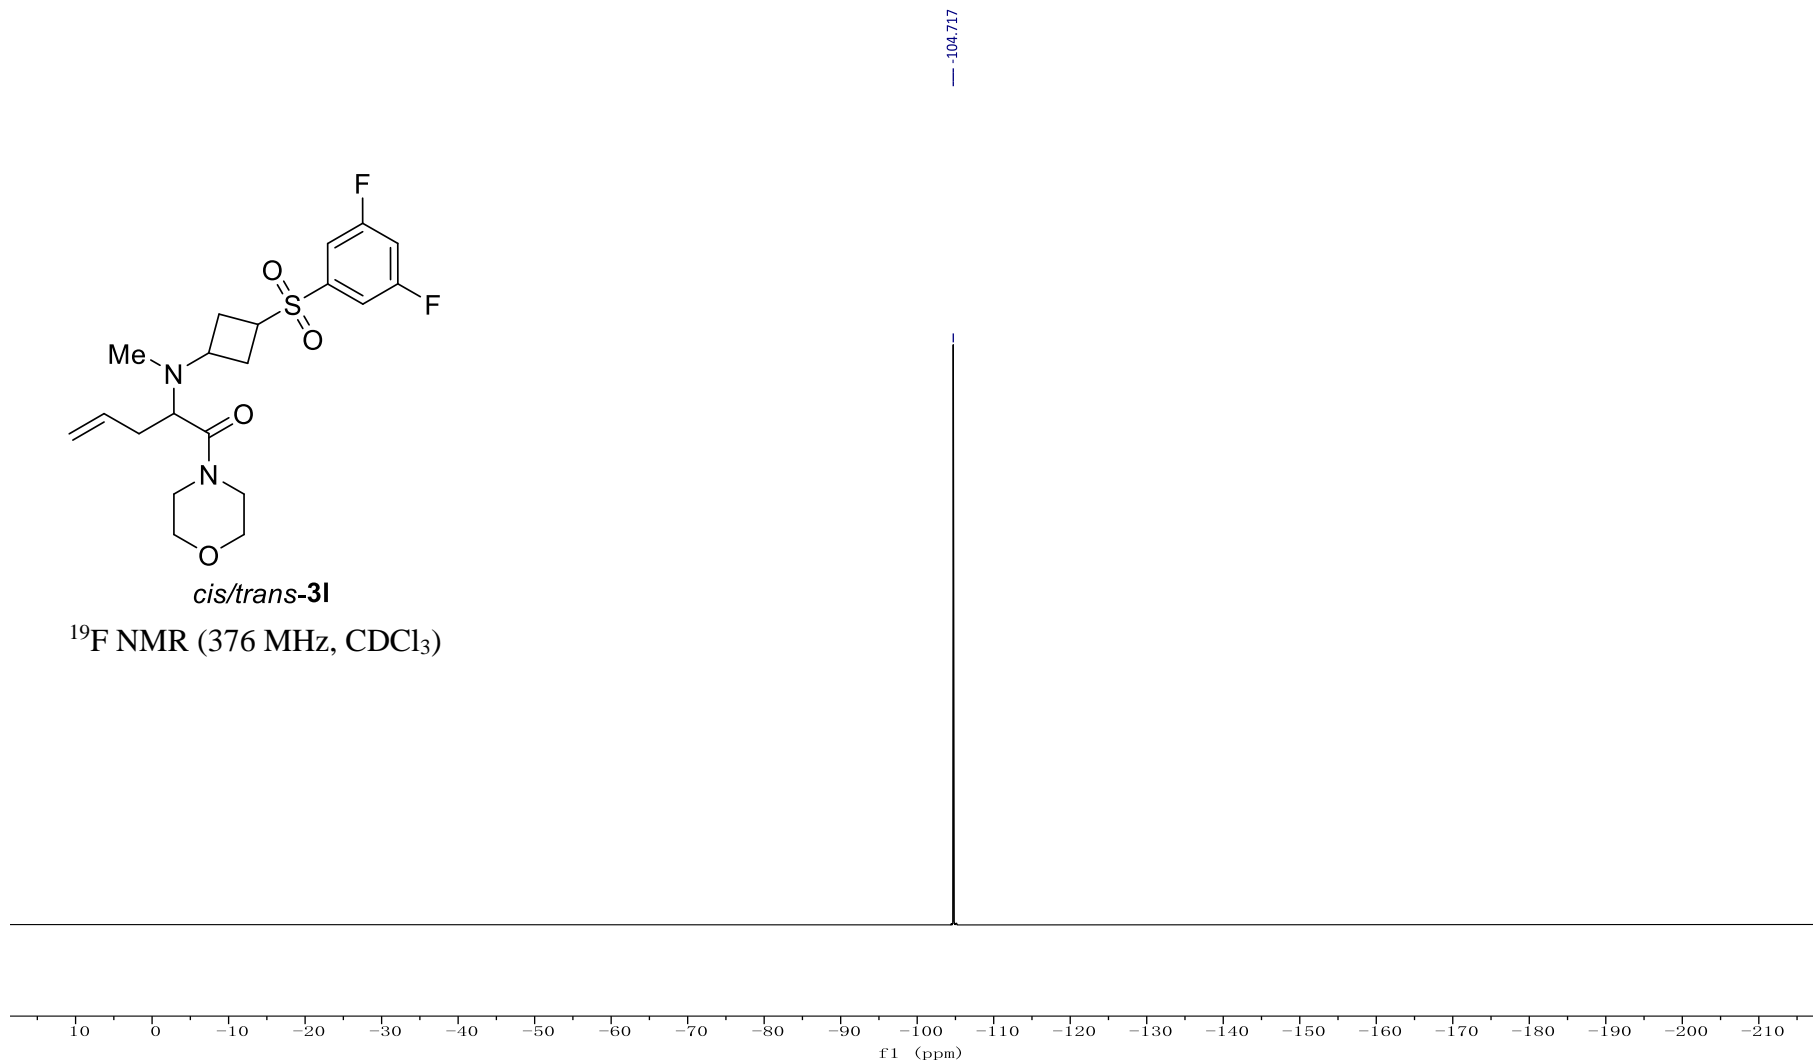

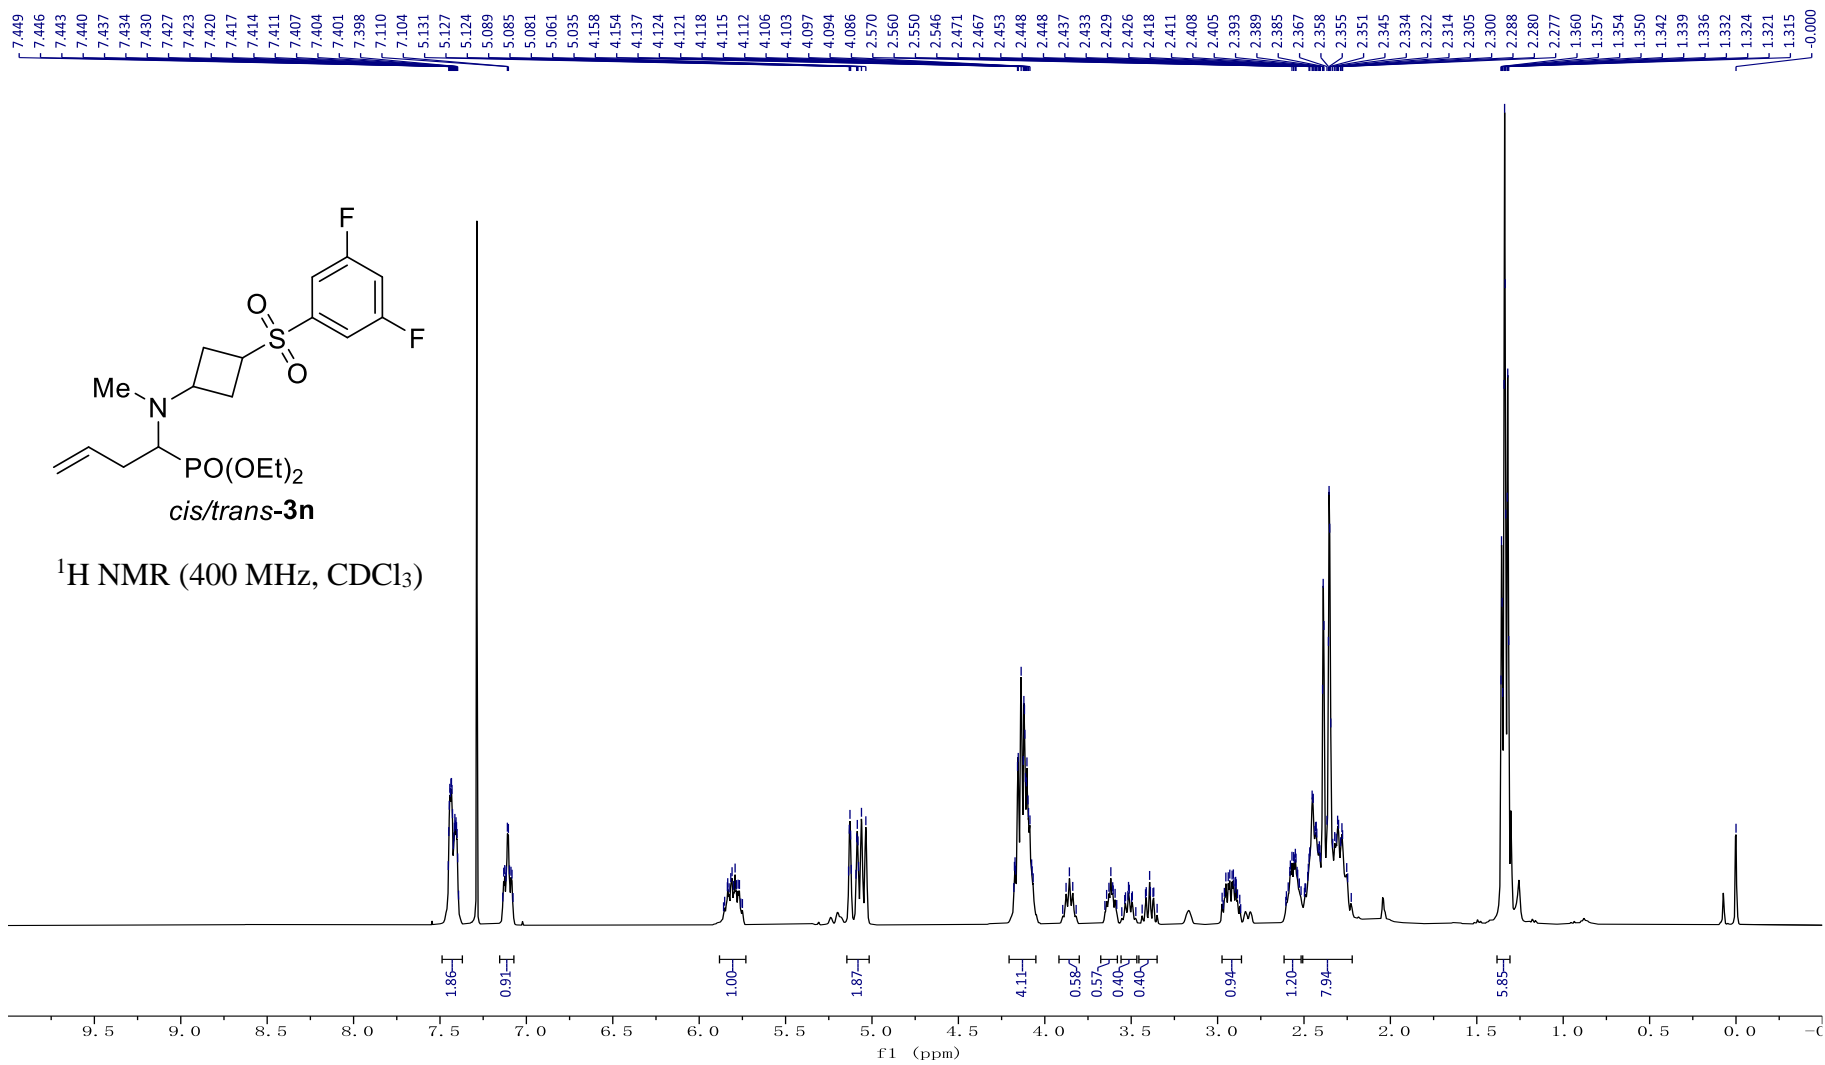

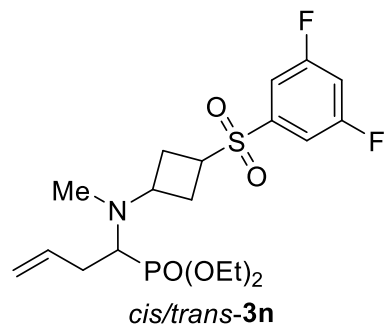

$^{13}\text{C}$  NMR (100 MHz,  $\text{CDCl}_3$ )

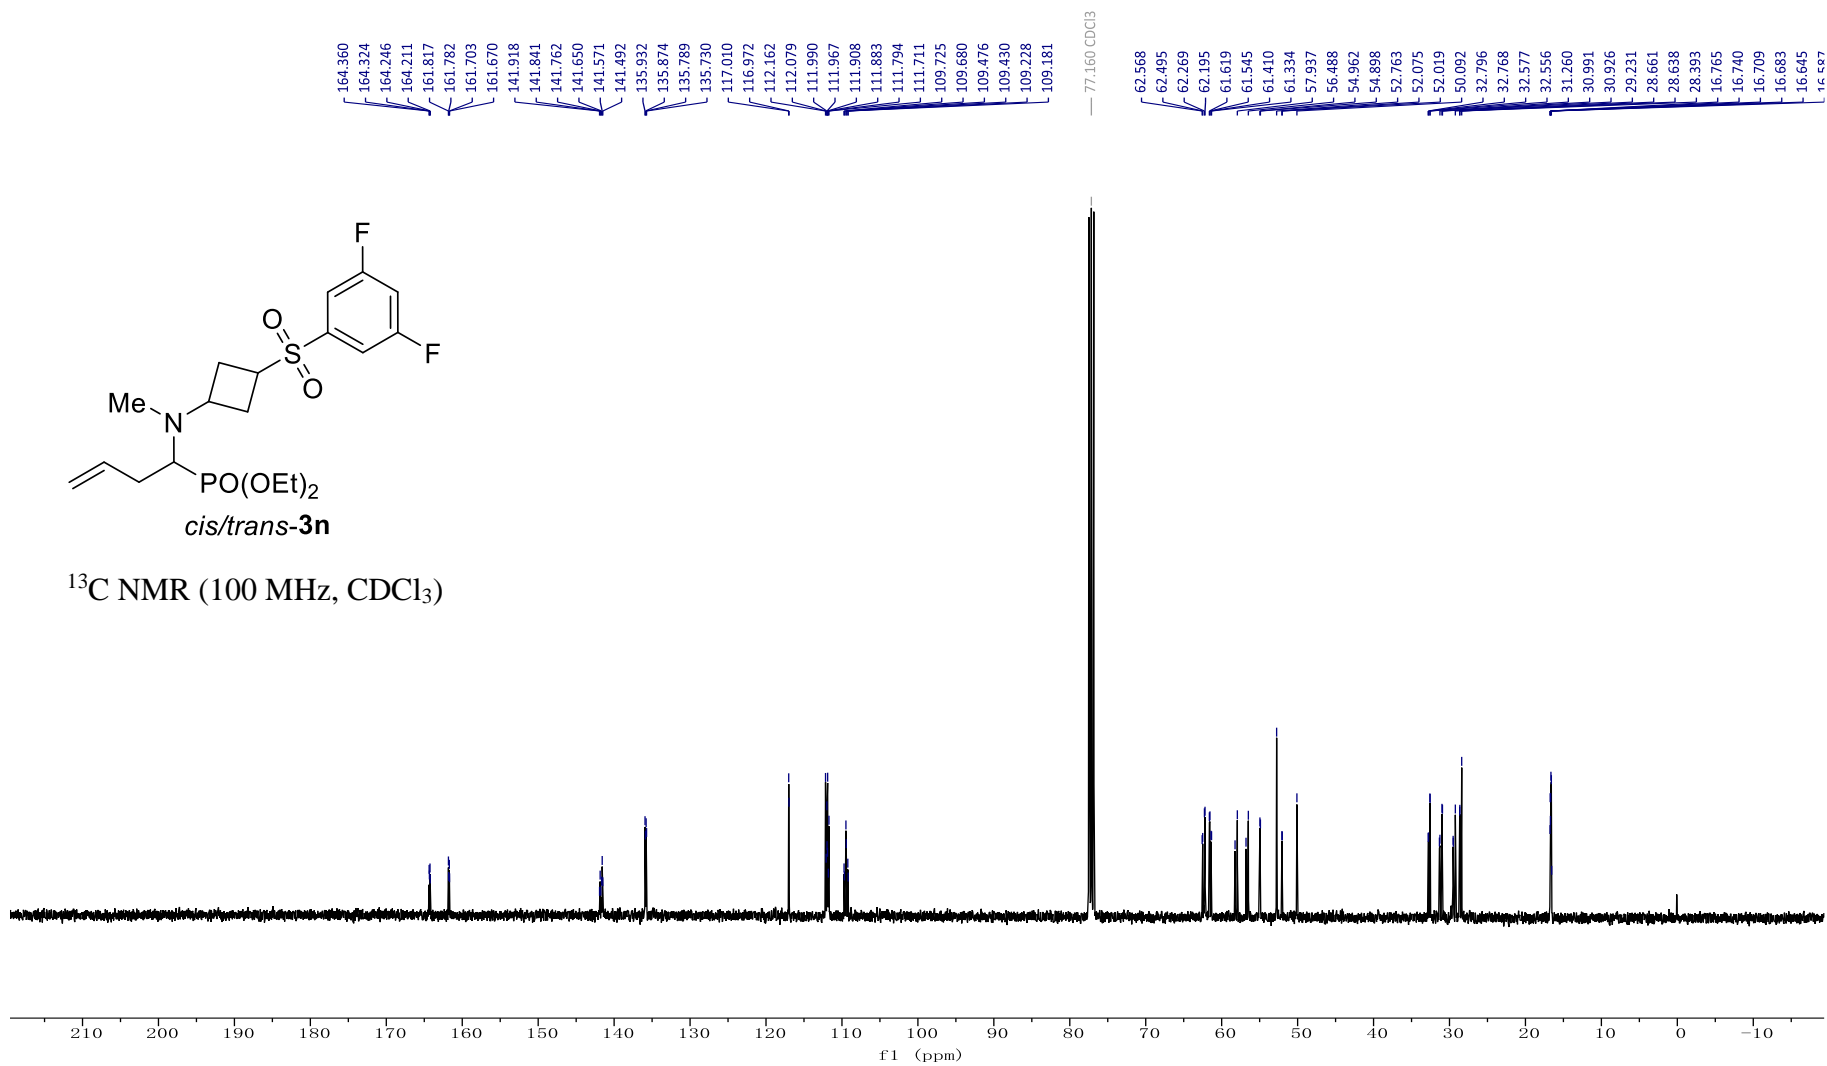

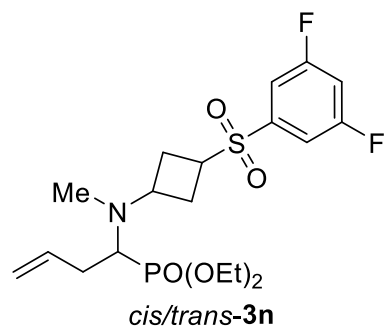

$^{19}\text{F}$  NMR (376 MHz,  $\text{CDCl}_3$ )

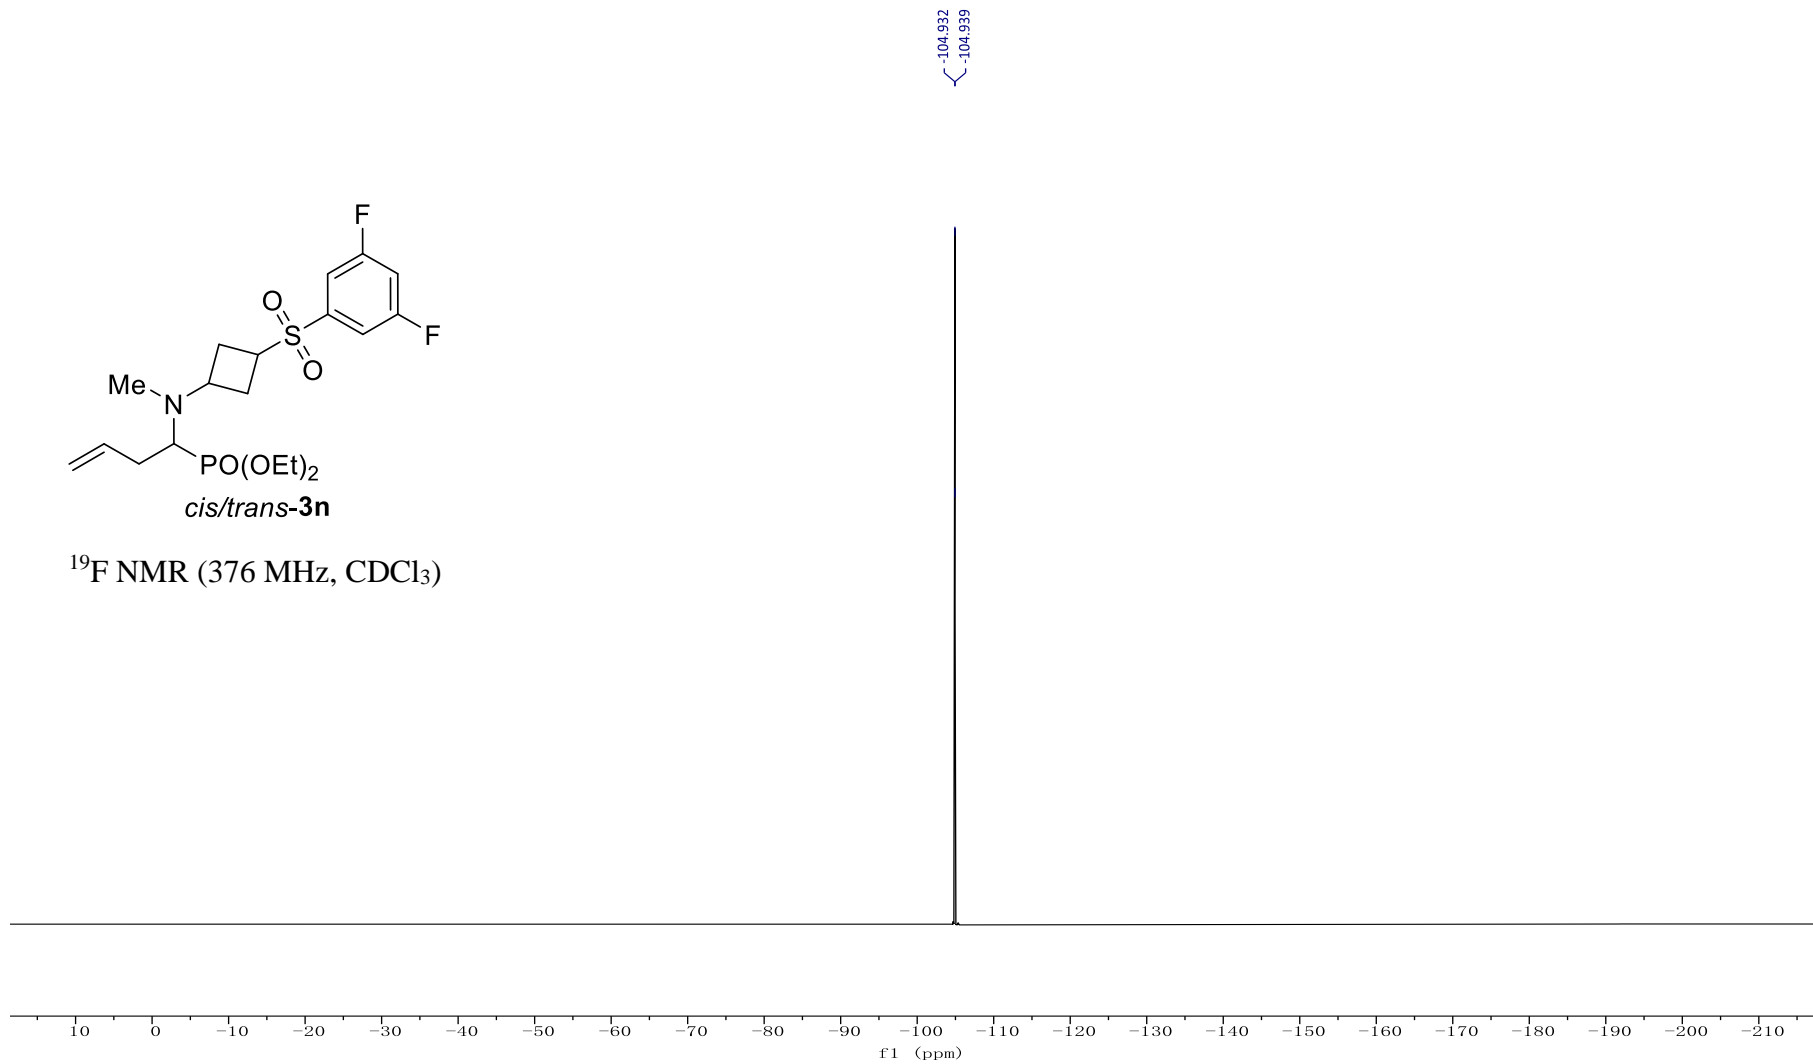

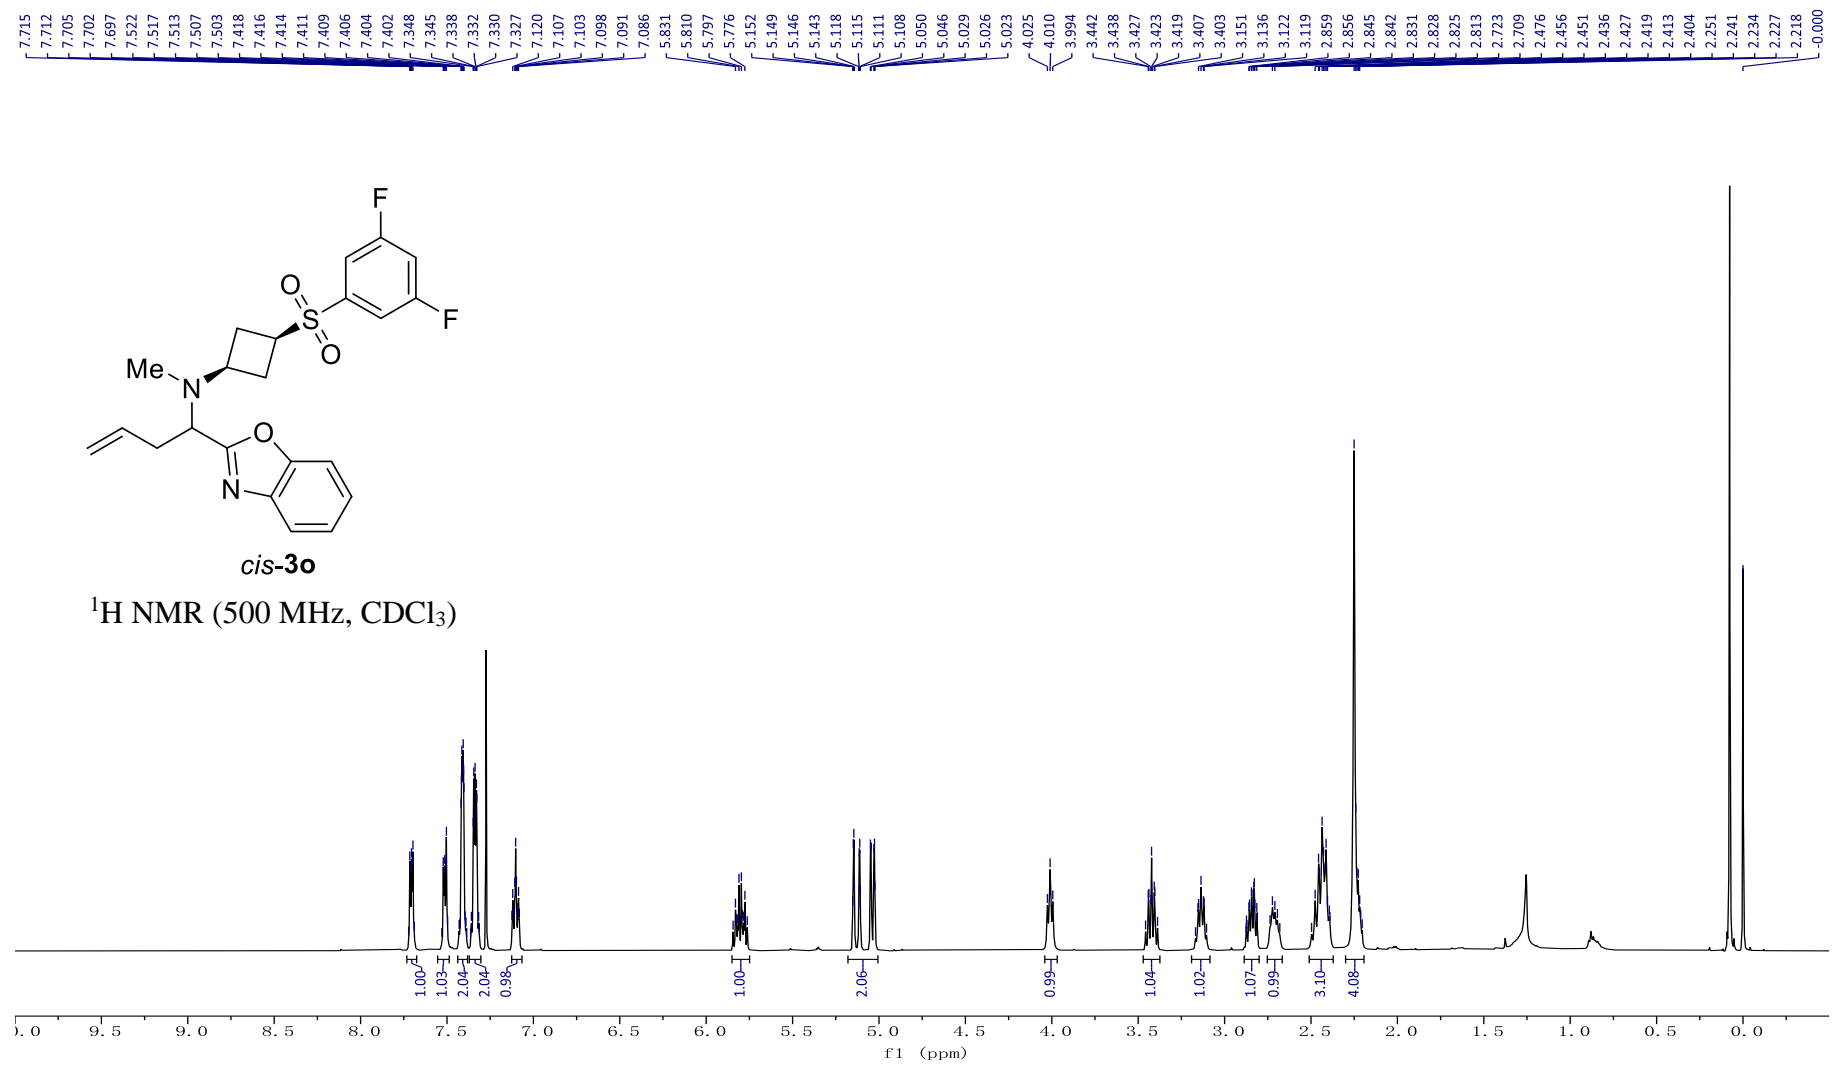



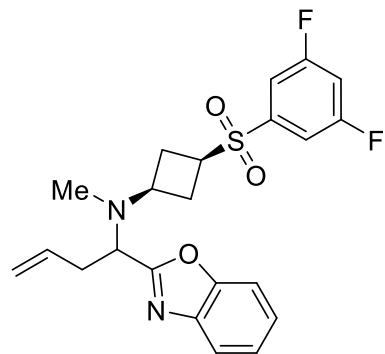

*cis*-**30**

$^{13}\text{C}$  NMR (125 MHz,  $\text{CDCl}_3$ )

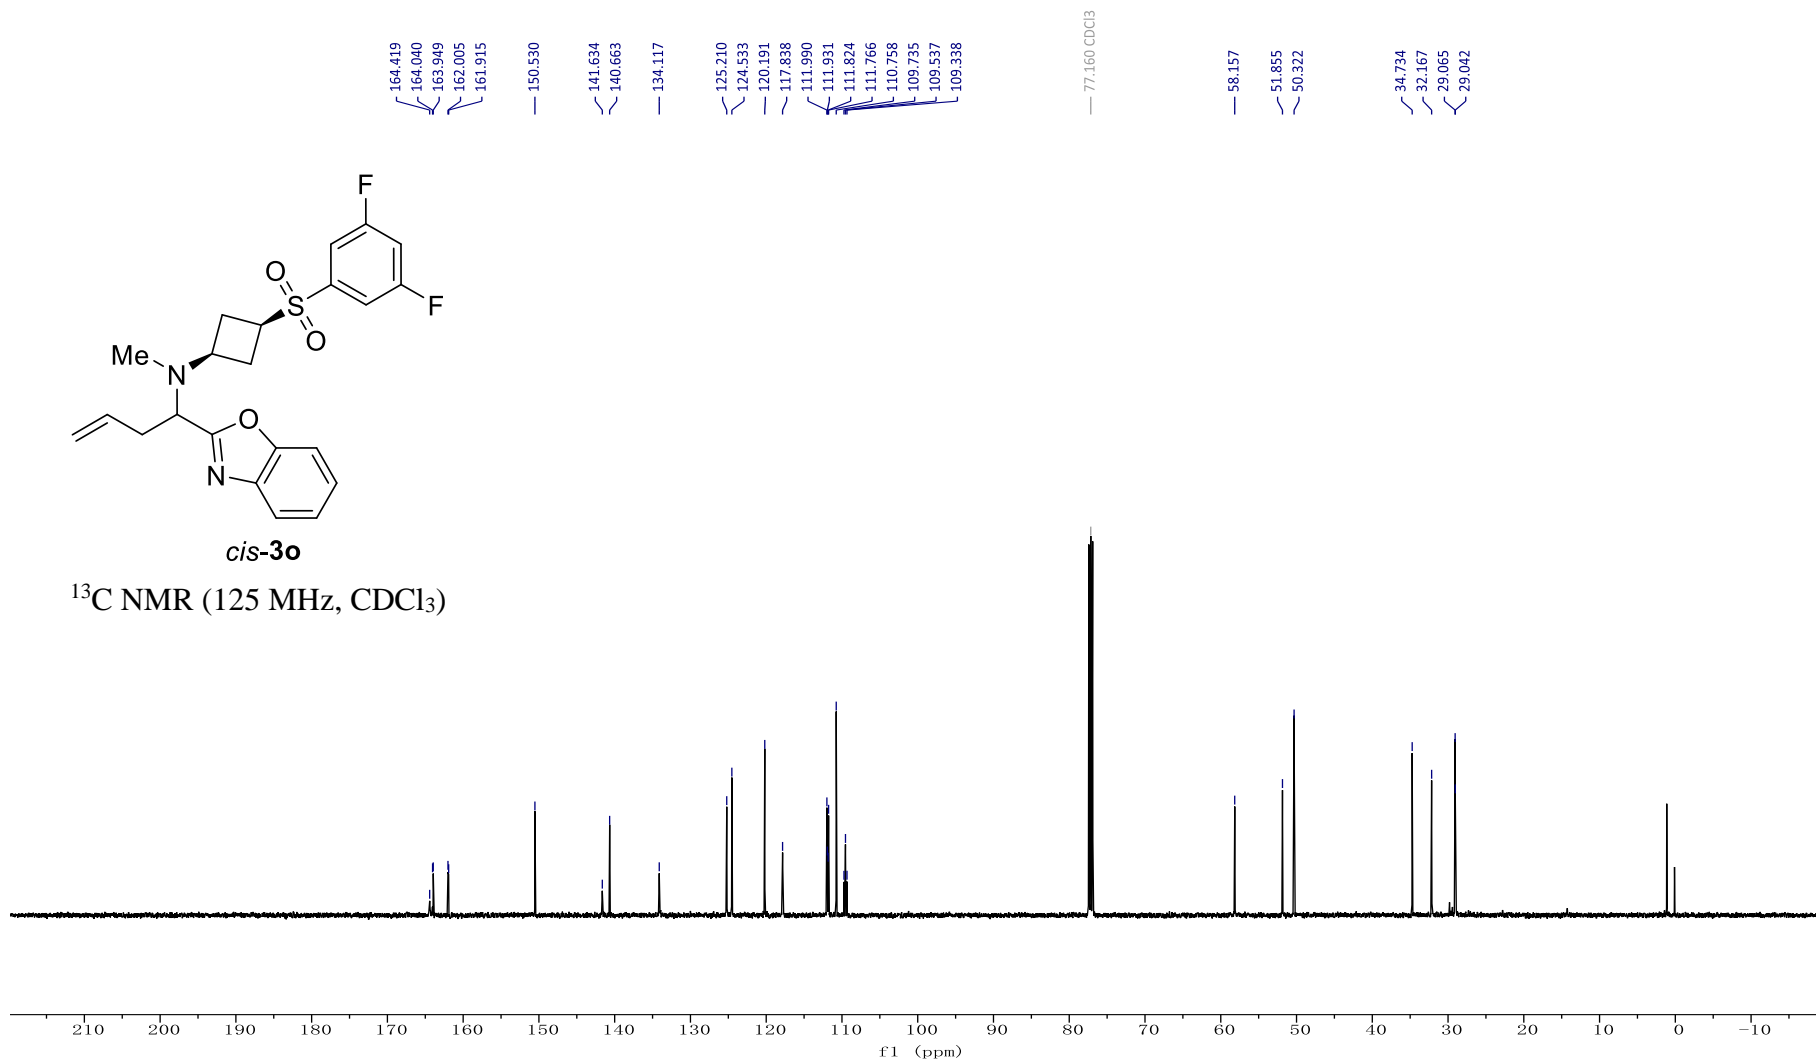

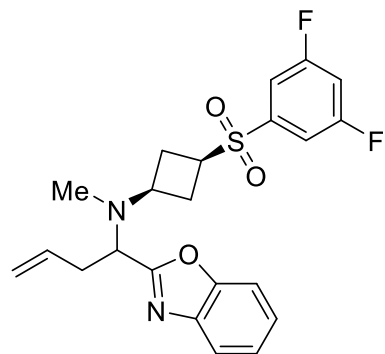

*cis-3o*

<sup>19</sup>F NMR (471 MHz, CDCl<sub>3</sub>)

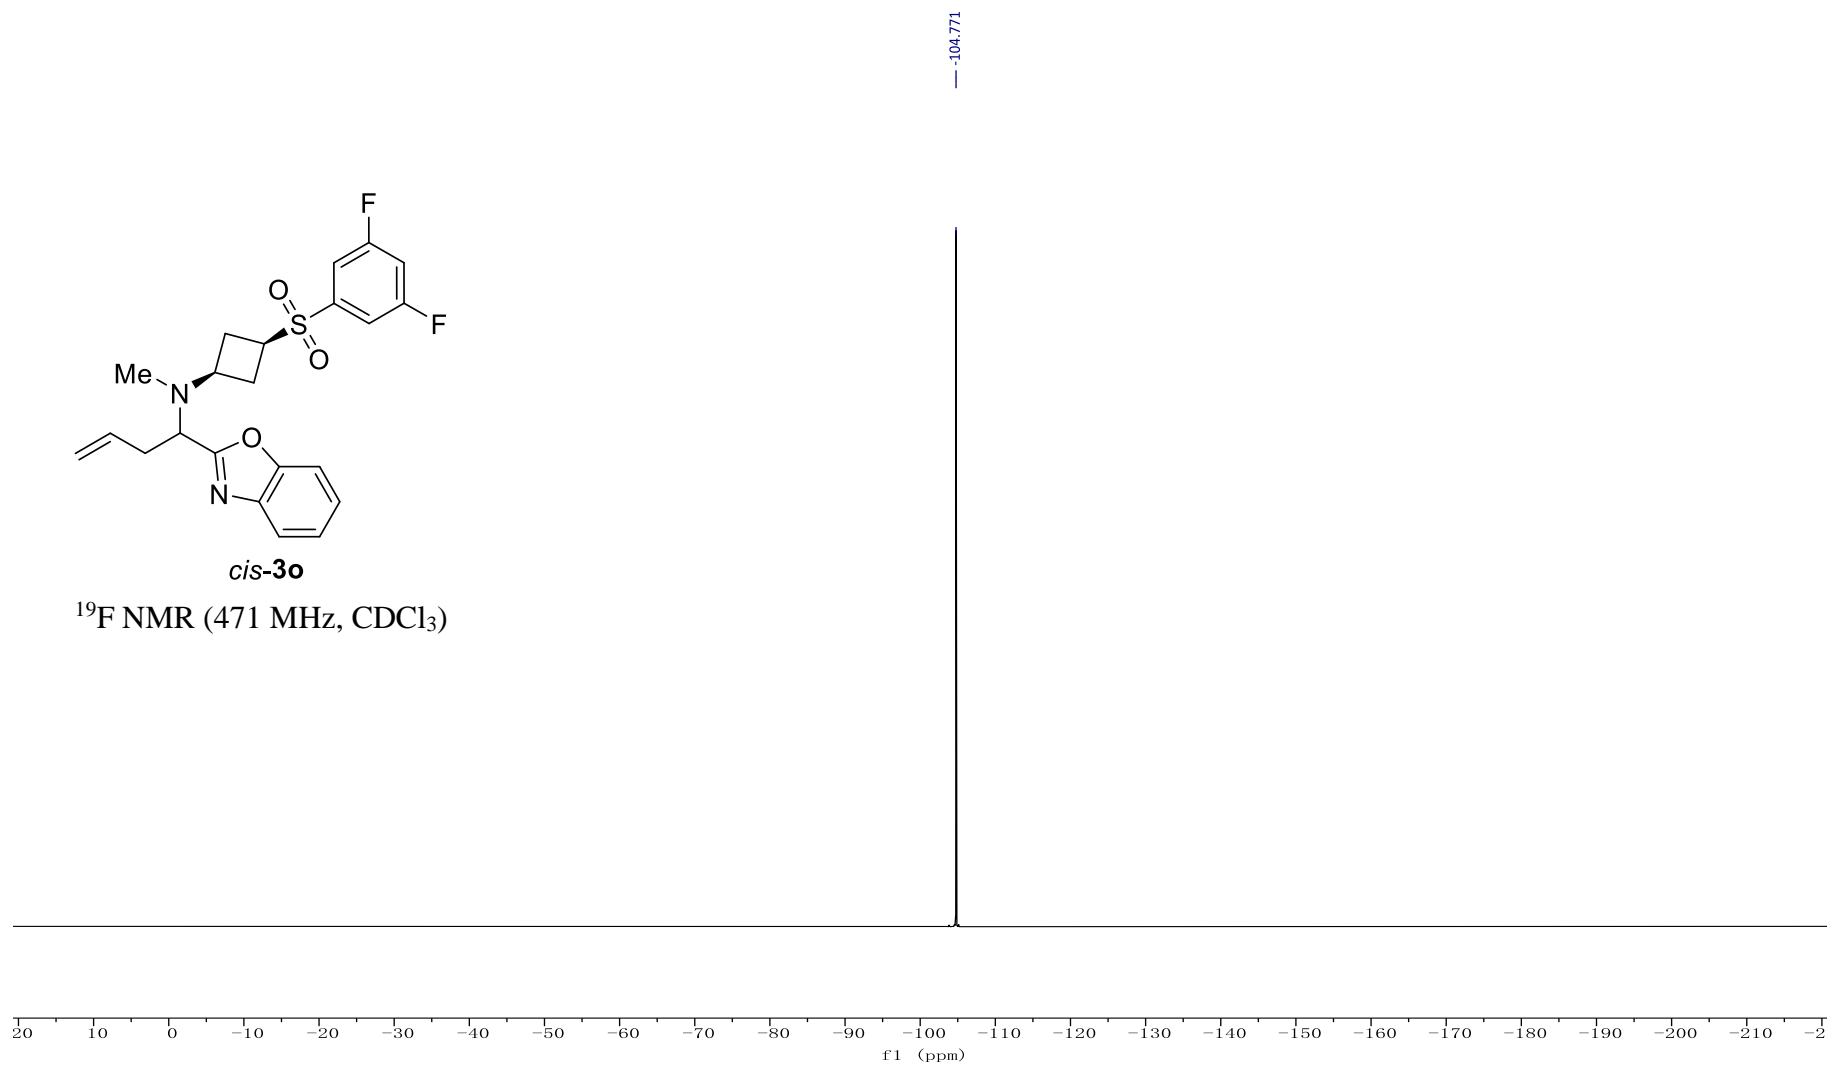

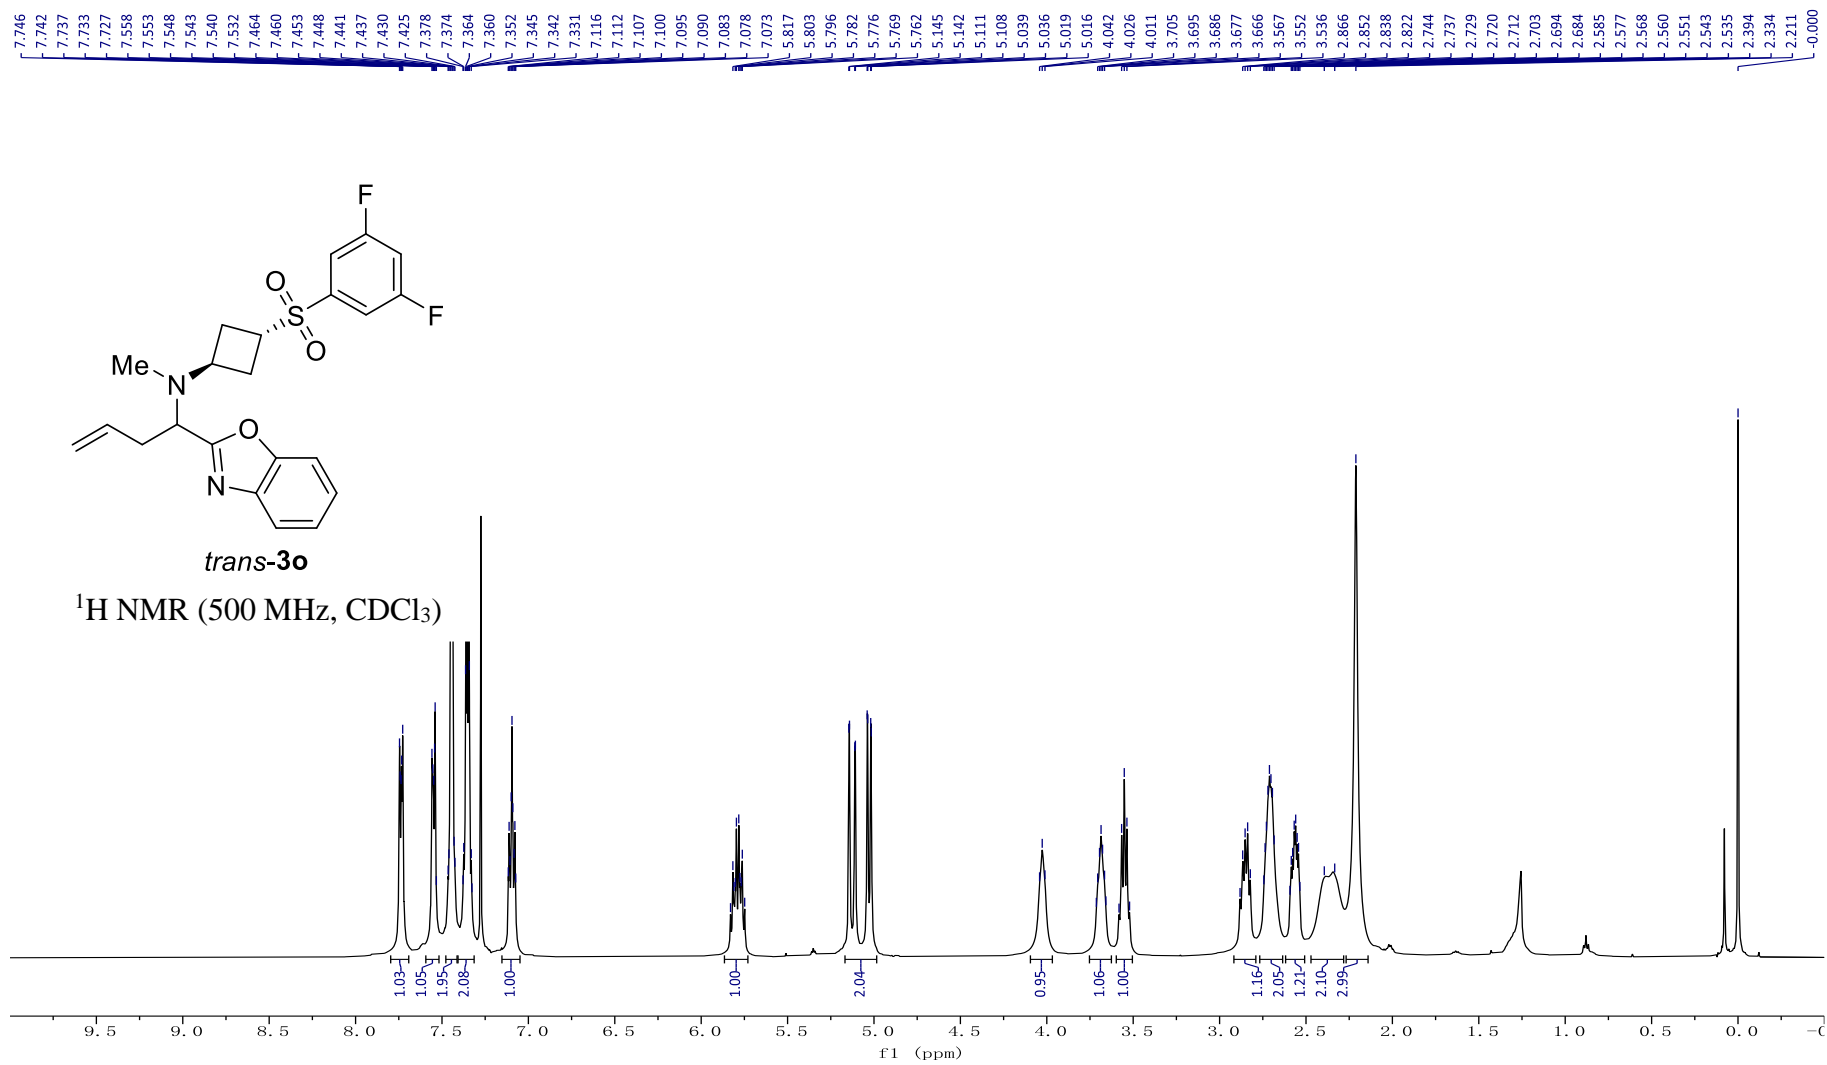

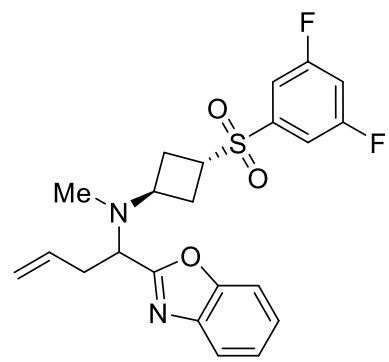

*trans*-3o

$^{13}\text{C}$  NMR (125 MHz,  $\text{CDCl}_3$ )

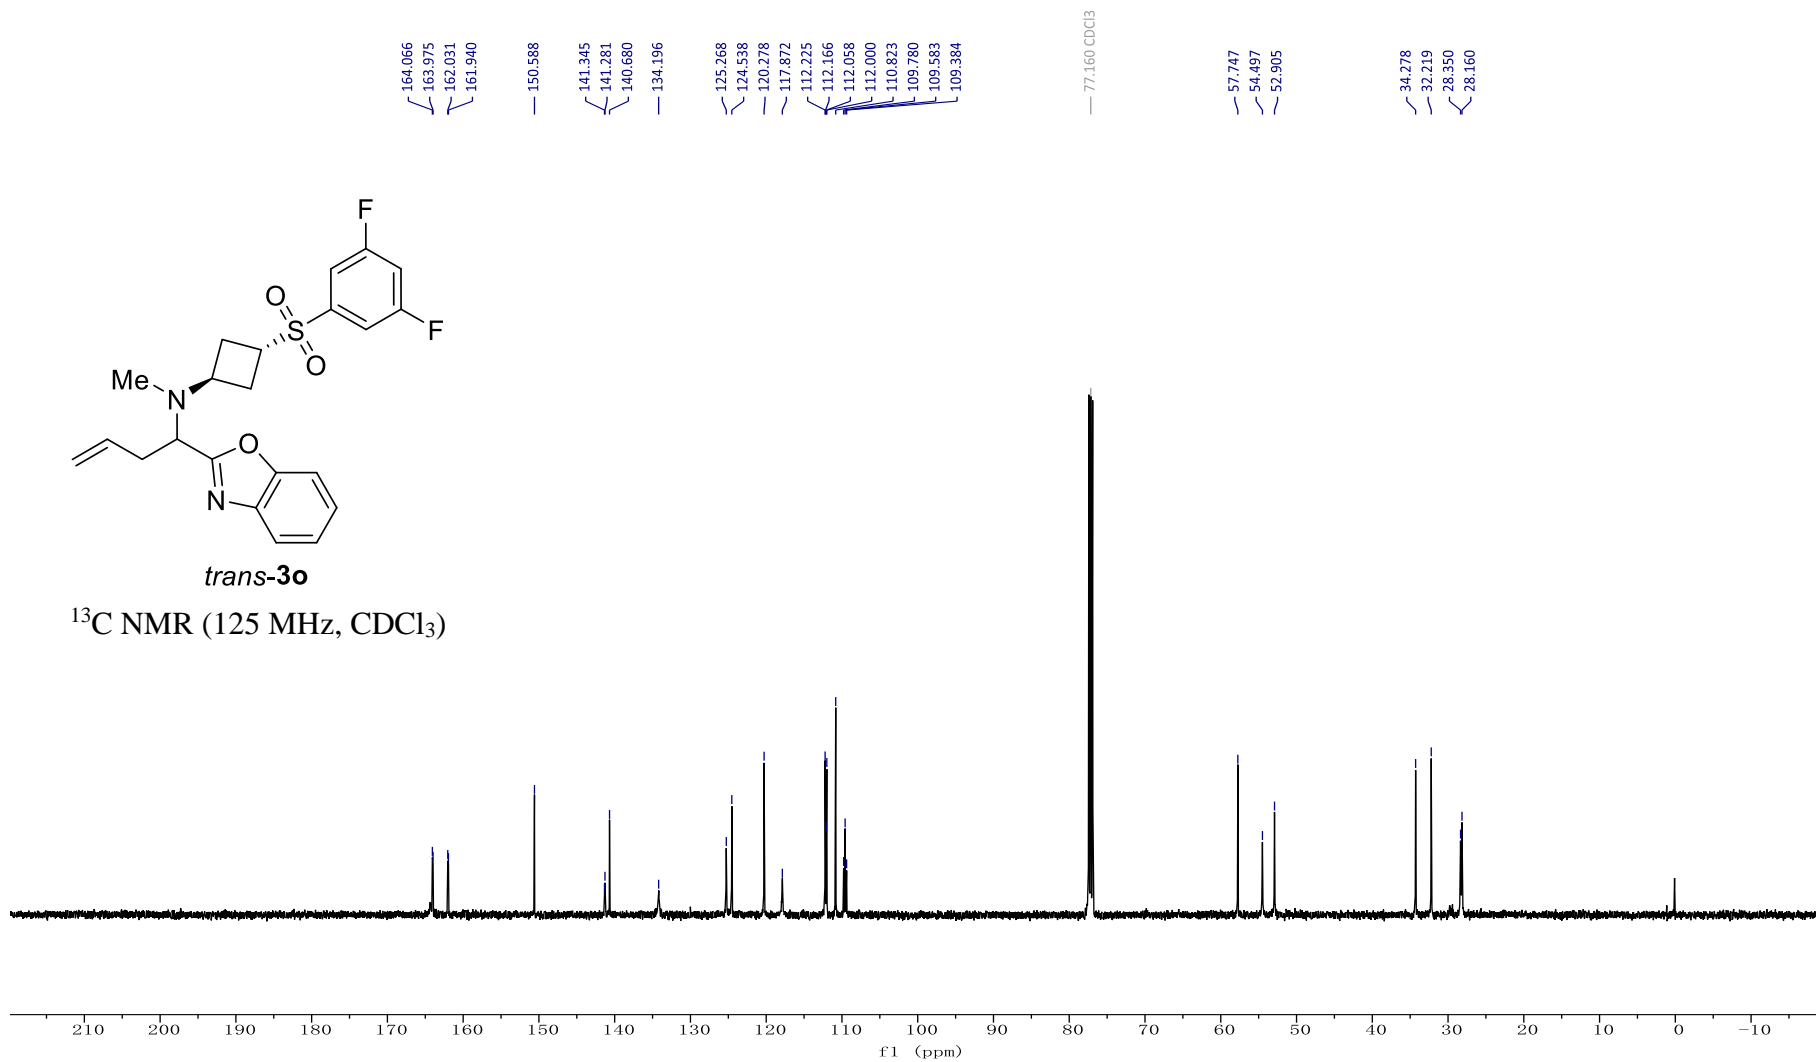

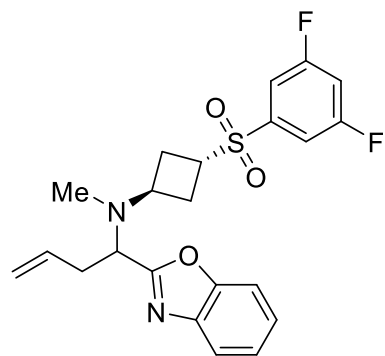

*trans*-3o

<sup>19</sup>F NMR (471 MHz, CDCl<sub>3</sub>)

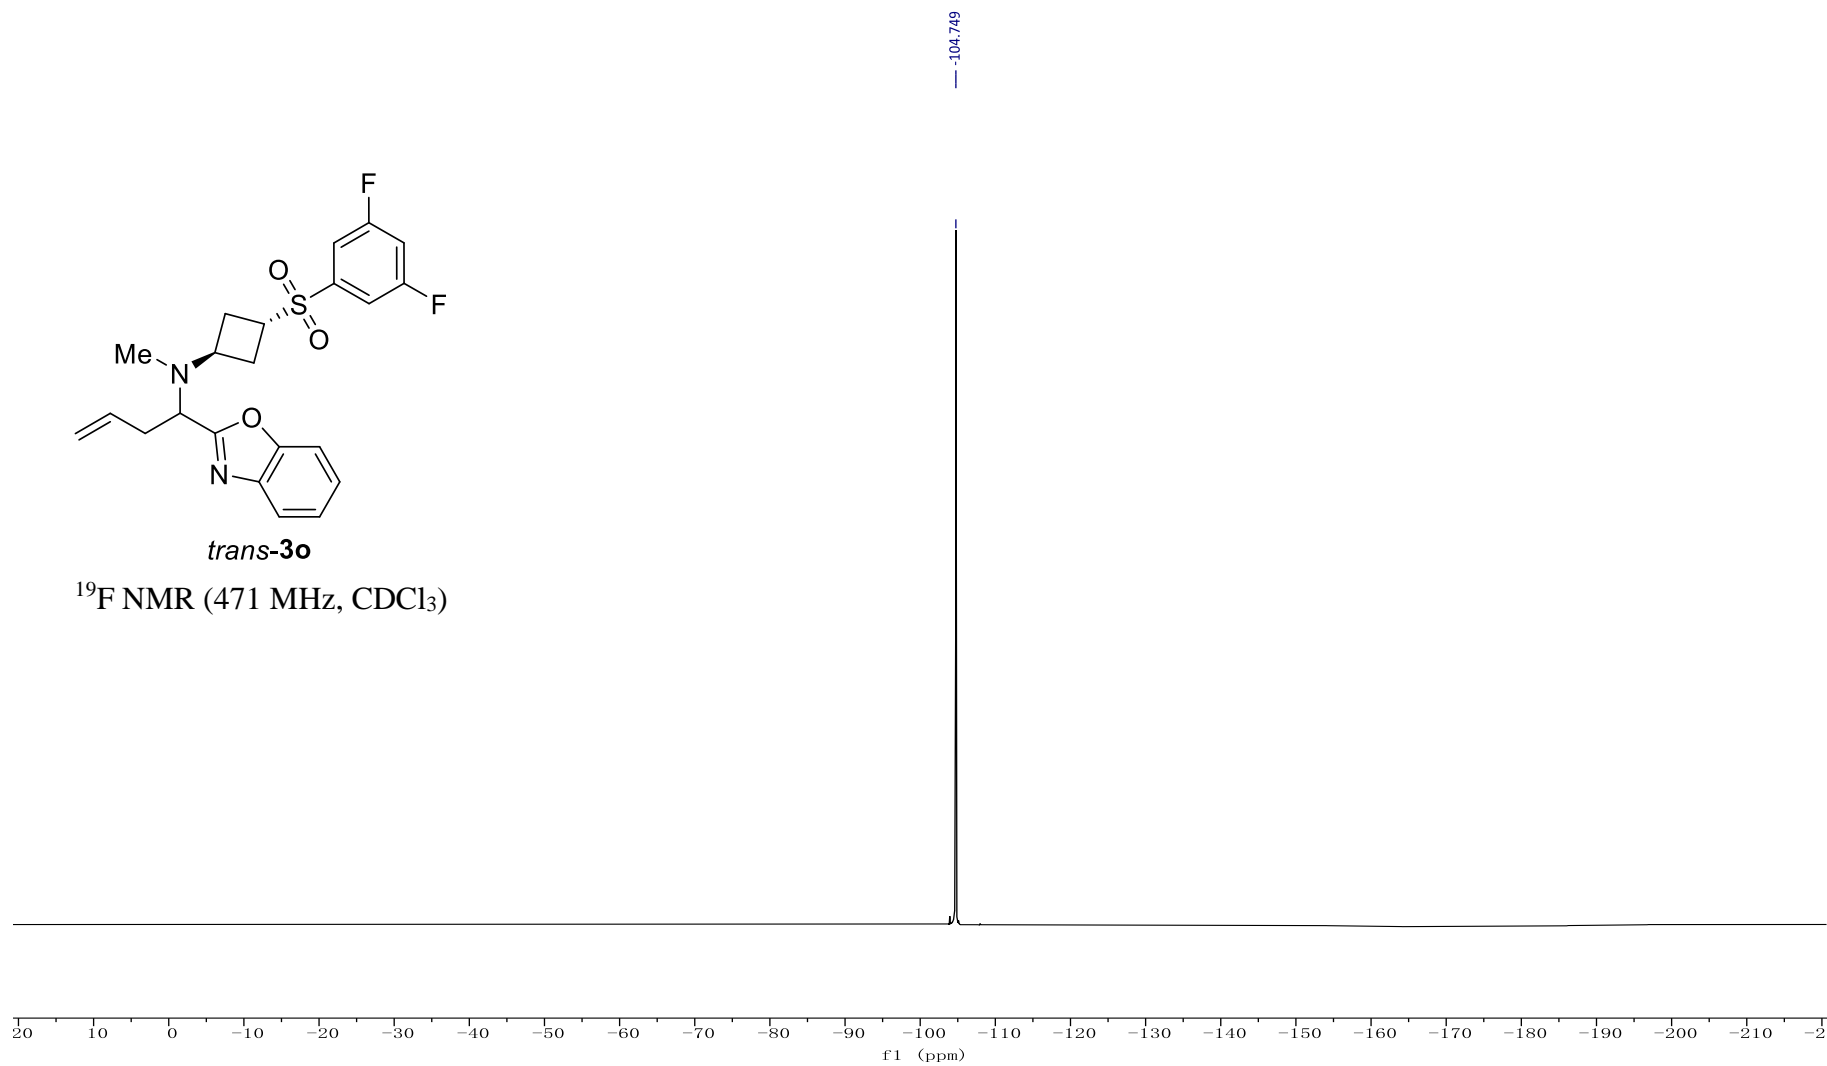

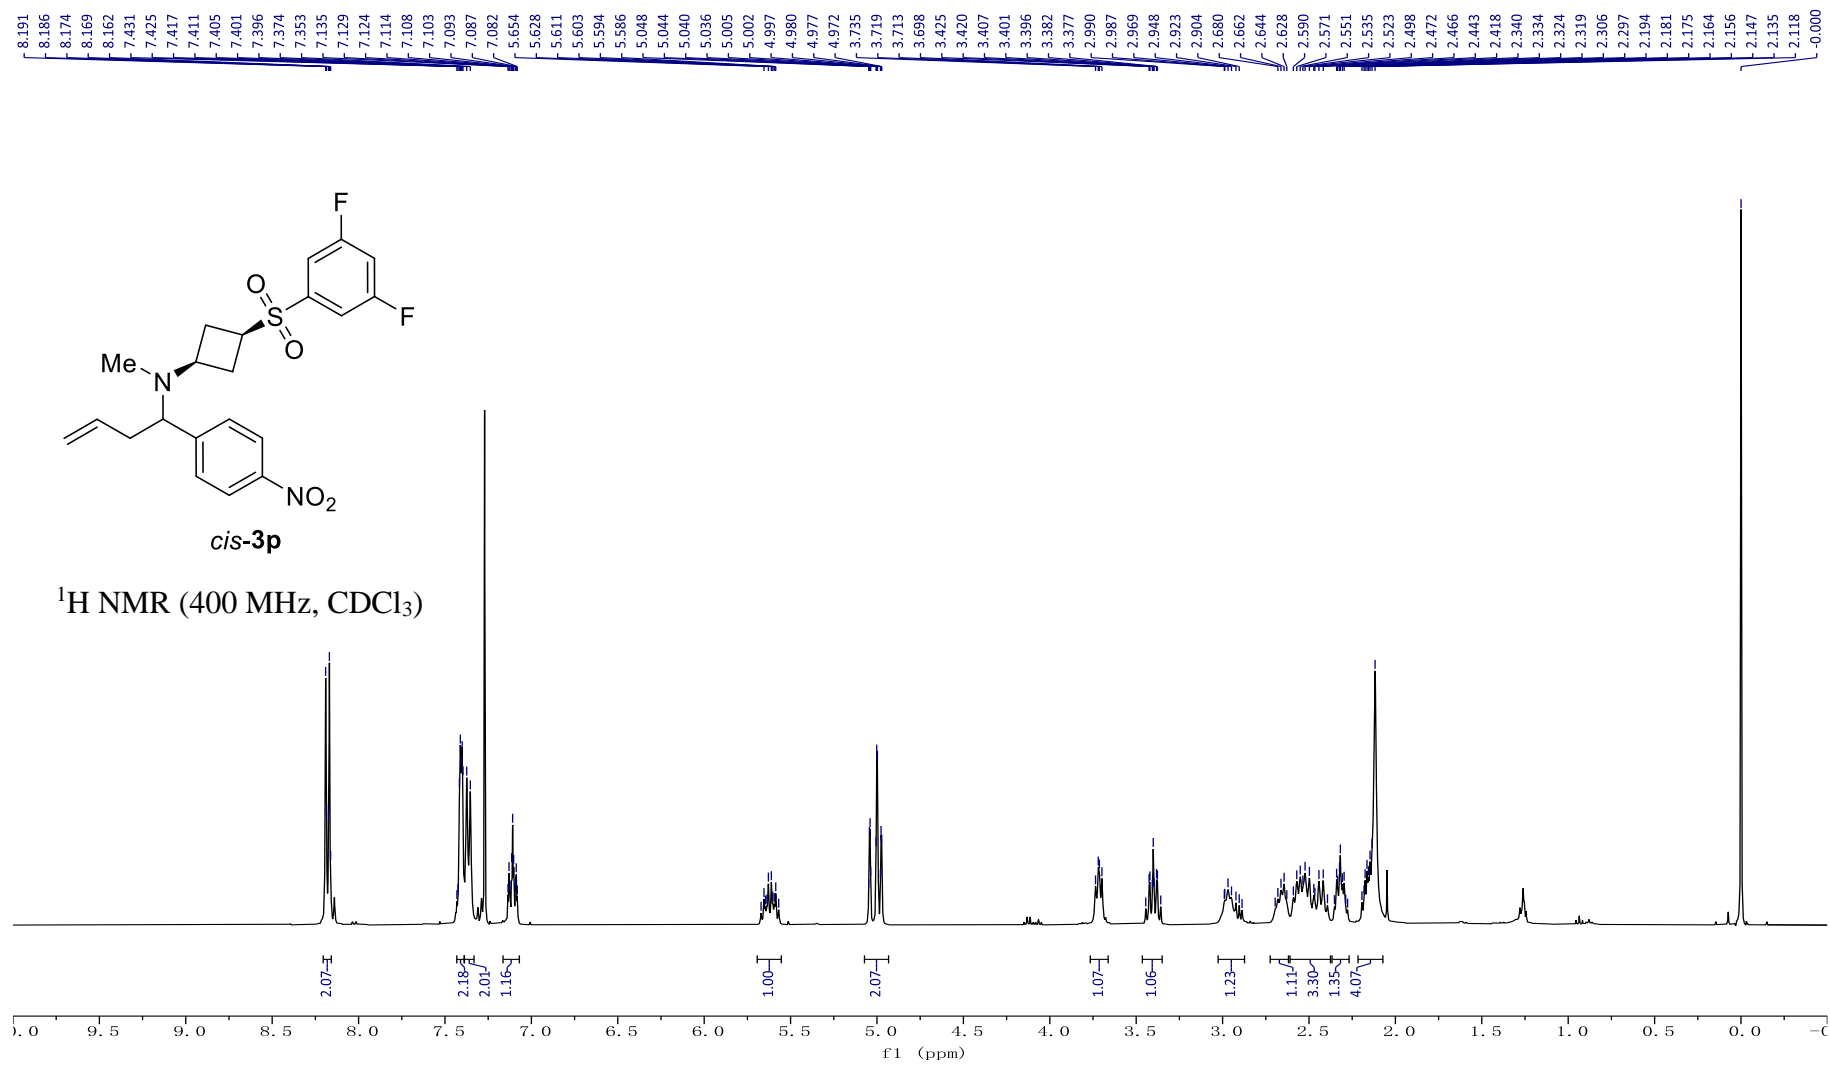

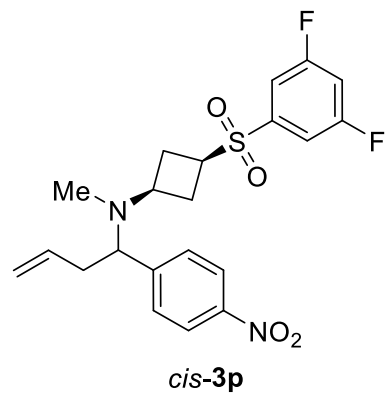

$^{13}\text{C}$  NMR (100 MHz,  $\text{CDCl}_3$ )

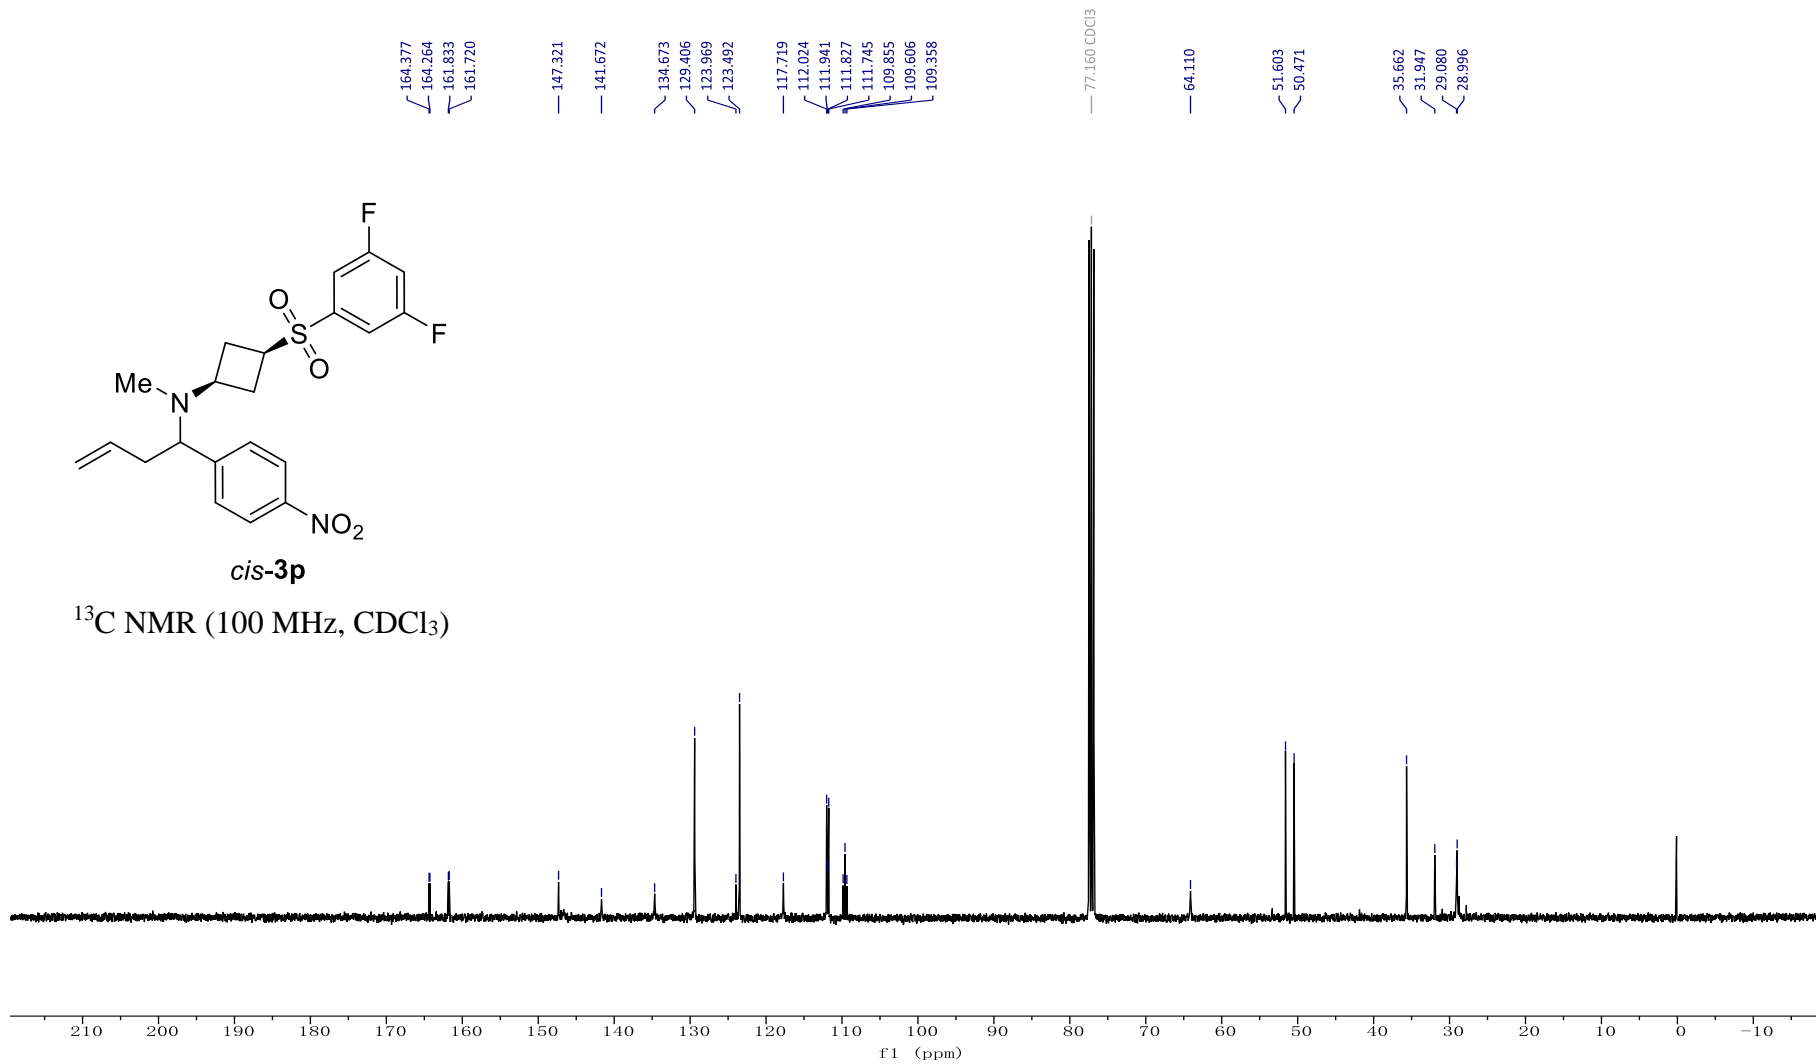

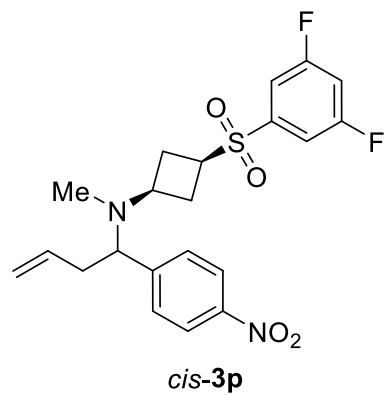

$^{19}\text{F}$  NMR (376 MHz,  $\text{CDCl}_3$ )

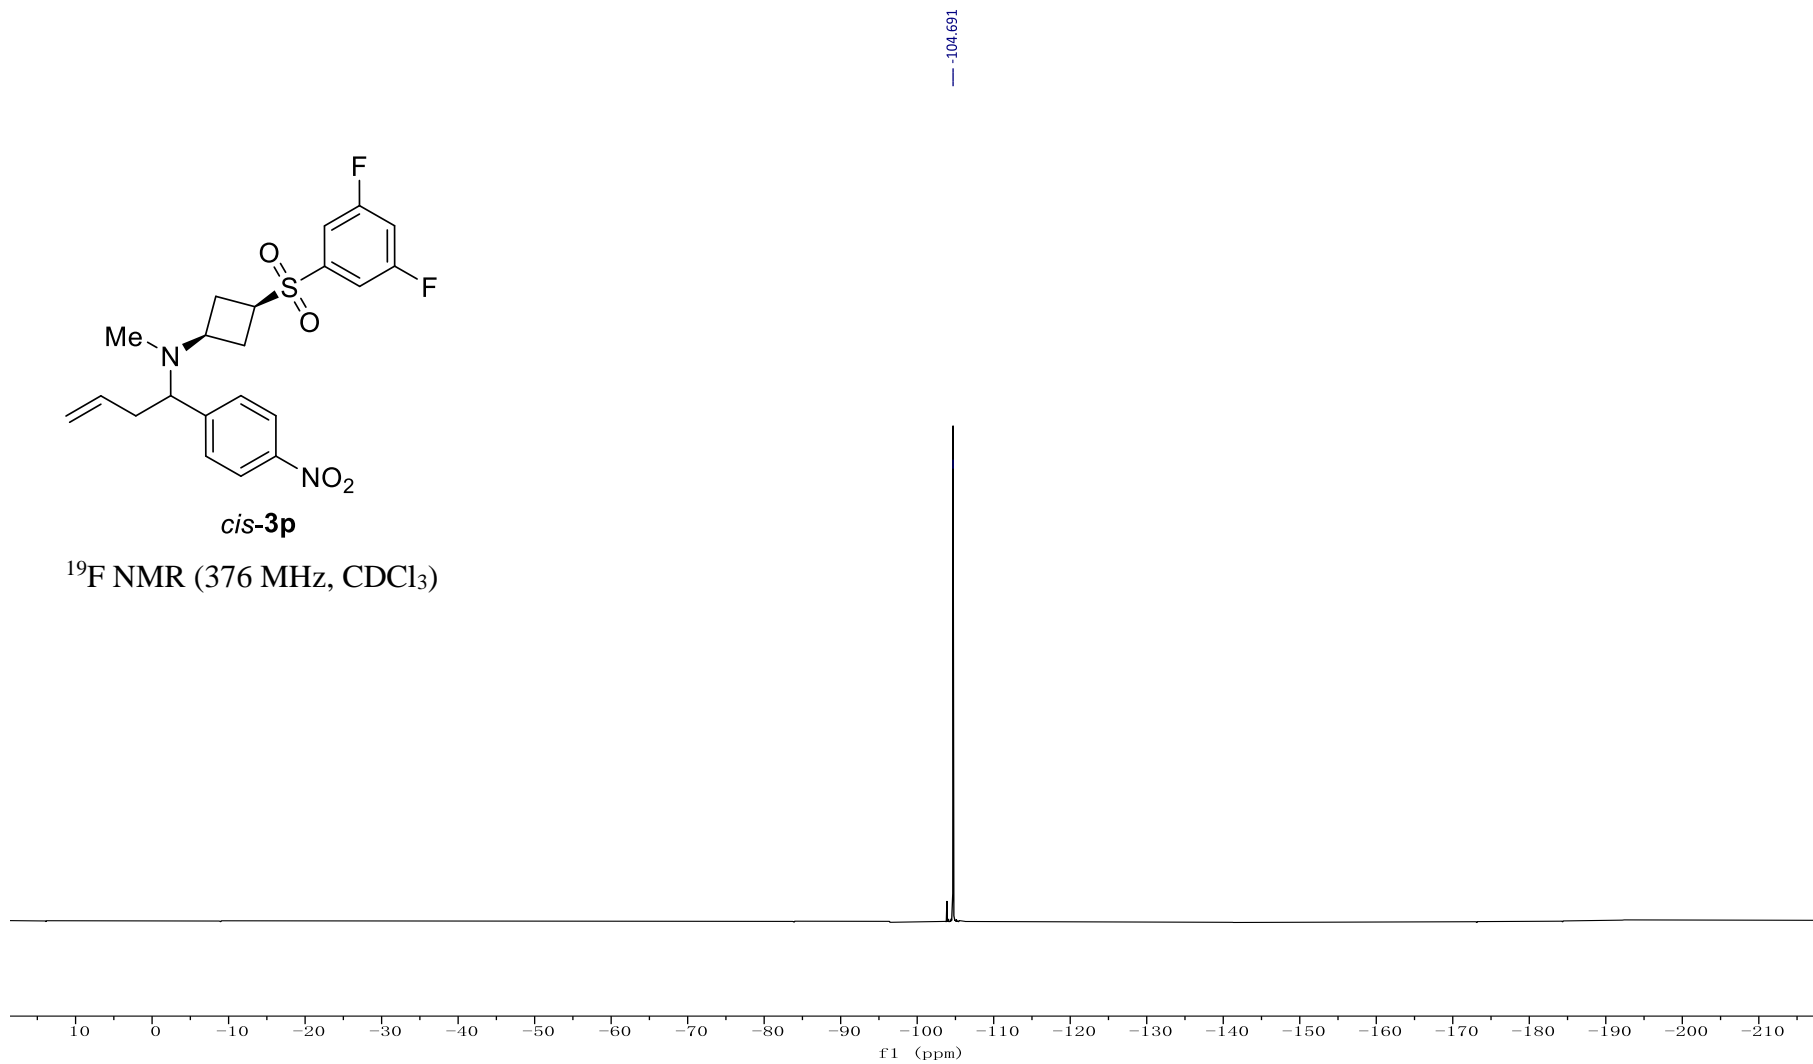



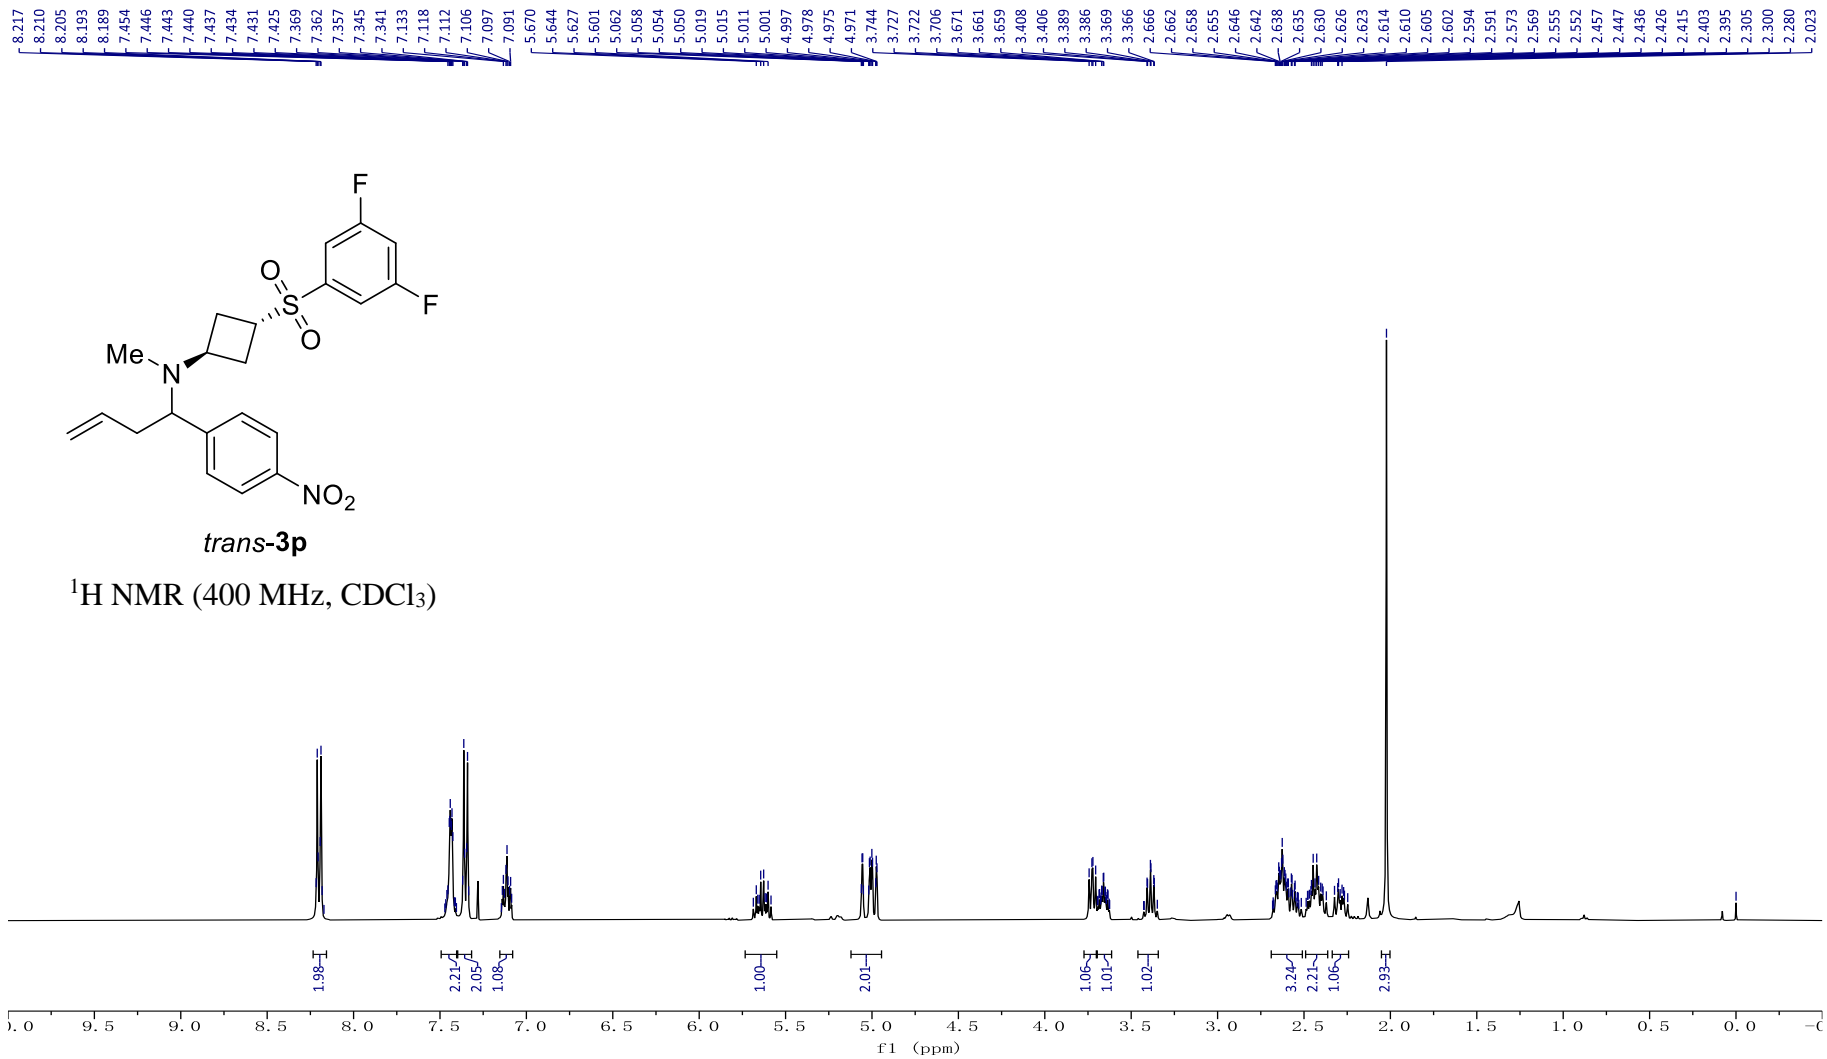

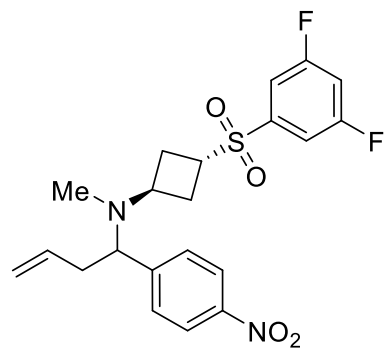

**trans-3p**

$^{13}\text{C}$  NMR (100 MHz,  $\text{CDCl}_3$ )

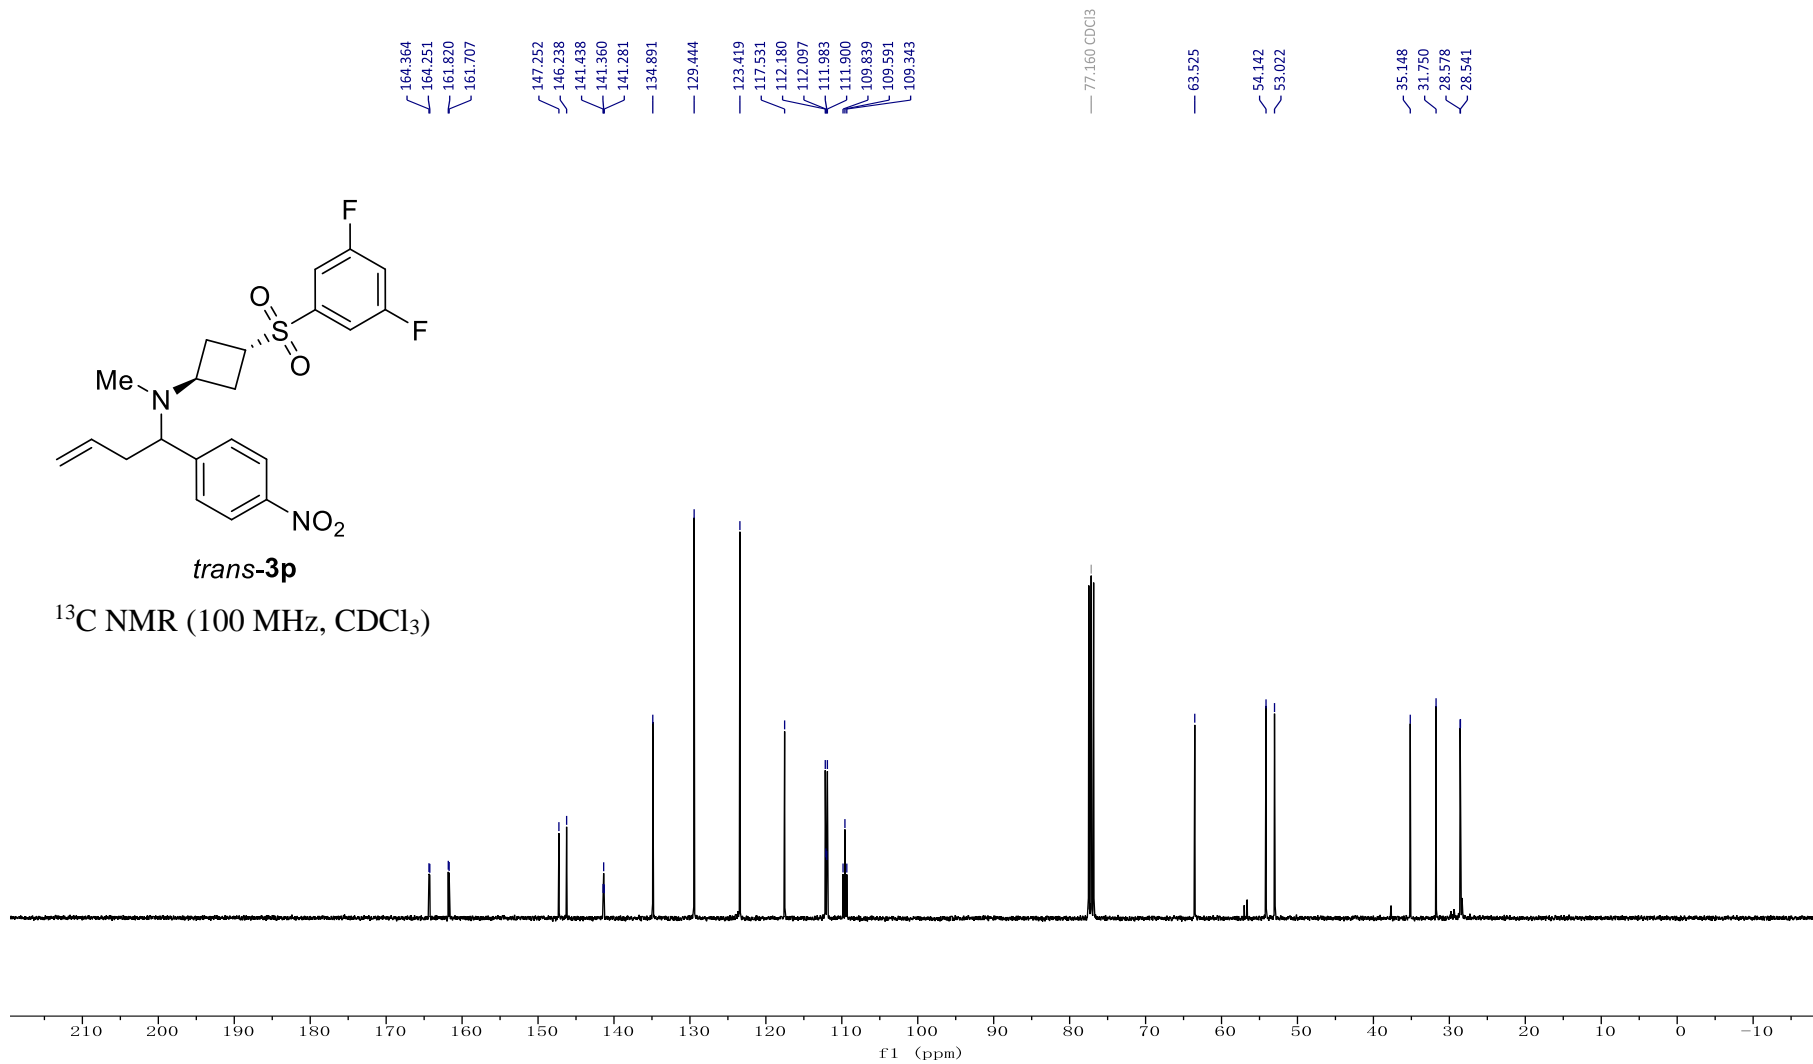

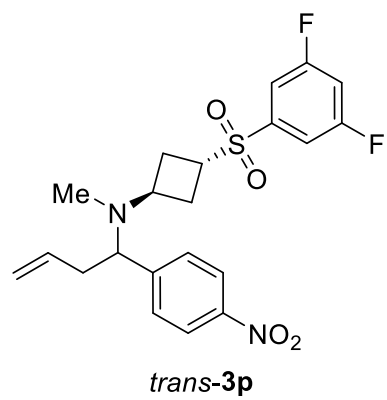

$^{19}\text{F}$  NMR (376 MHz,  $\text{CDCl}_3$ )

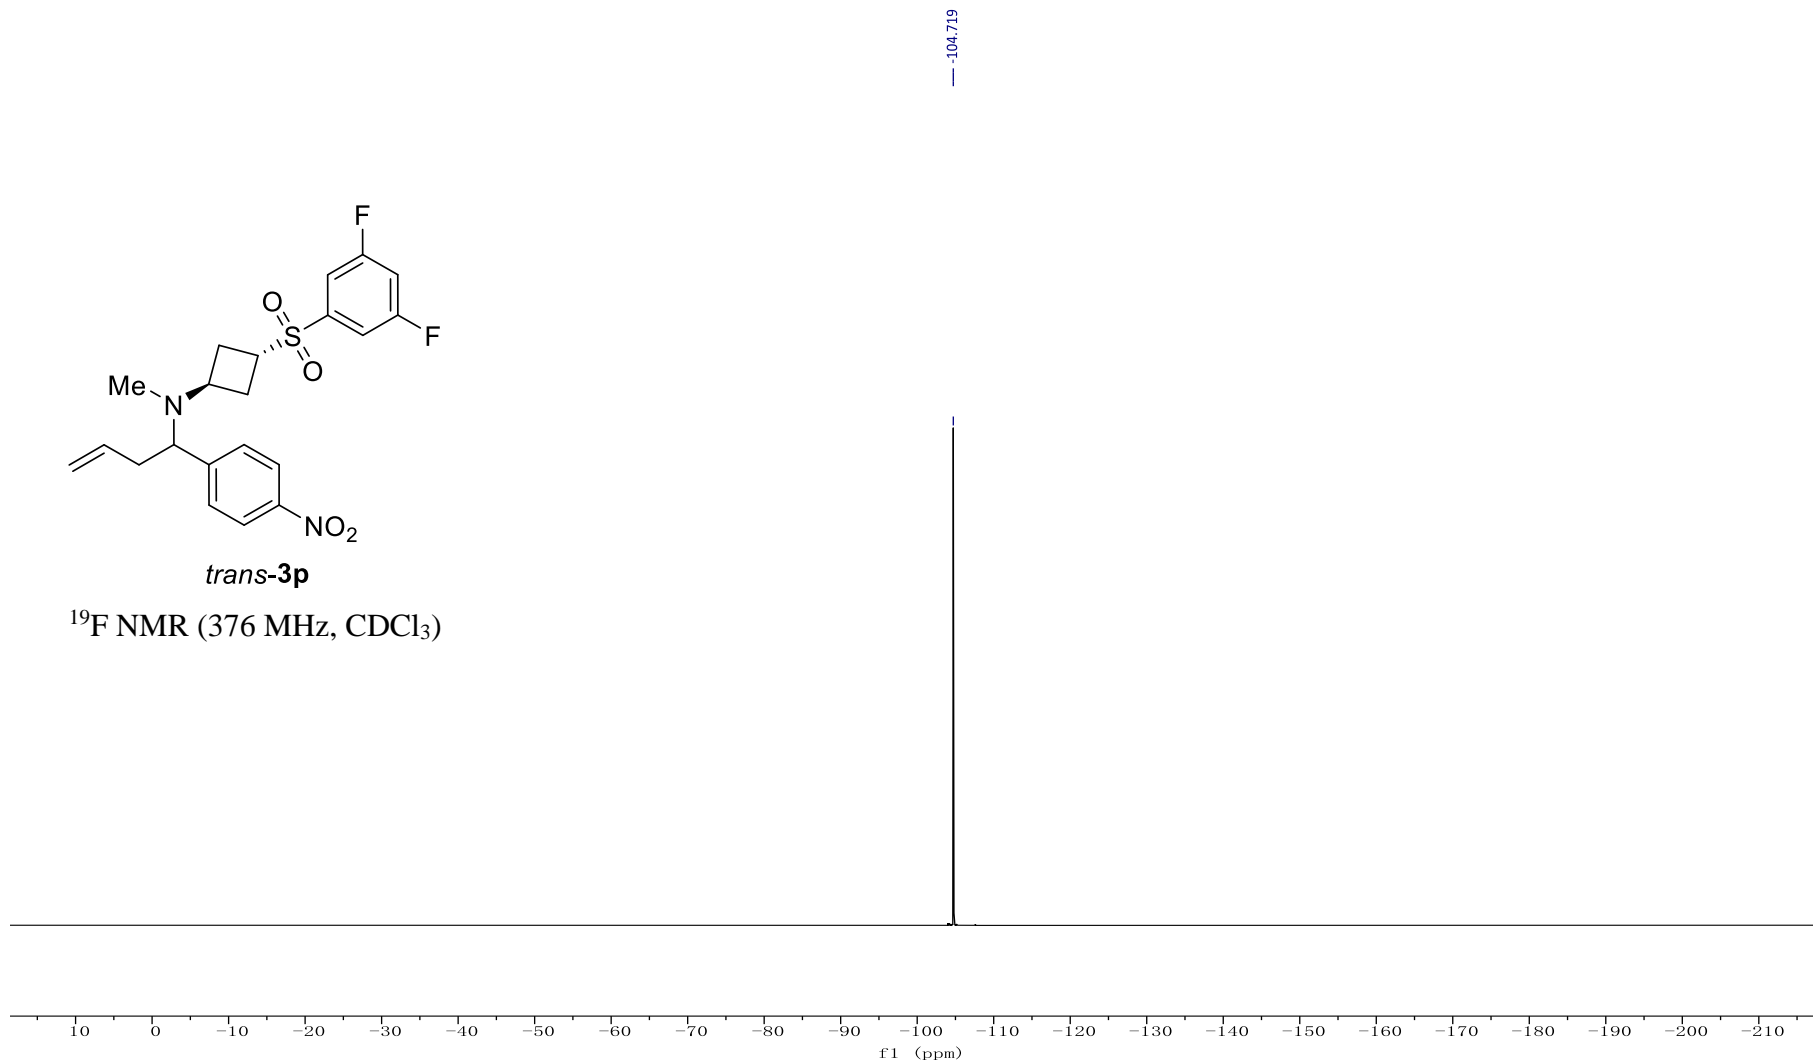

7.459  
7.457  
7.453  
7.451  
7.447  
7.444  
7.441  
7.438  
7.435  
7.121  
7.119  
7.116  
7.114  
7.110  
4.785  
4.780  
4.776  
4.773  
4.719  
4.716  
4.713  
4.711  
4.708  
4.177  
4.172  
4.169  
4.159  
4.155  
4.152  
4.142  
4.137  
4.134  
4.128  
3.641  
3.607  
3.587  
3.483  
3.430  
3.422  
3.416  
3.413  
3.411  
3.408  
3.395  
3.392  
2.600  
2.540  
2.506  
2.356  
2.352  
2.341  
2.332  
2.323  
2.306  
2.301  
2.281  
2.273  
2.258  
2.254  
2.251  
2.209  
2.203  
2.200  
1.747  
1.742  
1.735  
1.731  
1.728  
1.315  
1.311  
1.308  
1.297  
1.293  
1.290  
1.279  
1.275  
1.272  
1.266  
1.263  
1.252  
1.248  
1.245  
0.005  
0.000  
-0.002

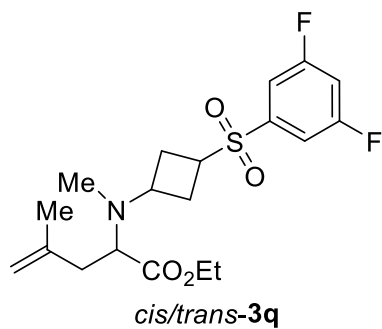

$^1\text{H NMR}$  (400 MHz,  $\text{CDCl}_3$ )

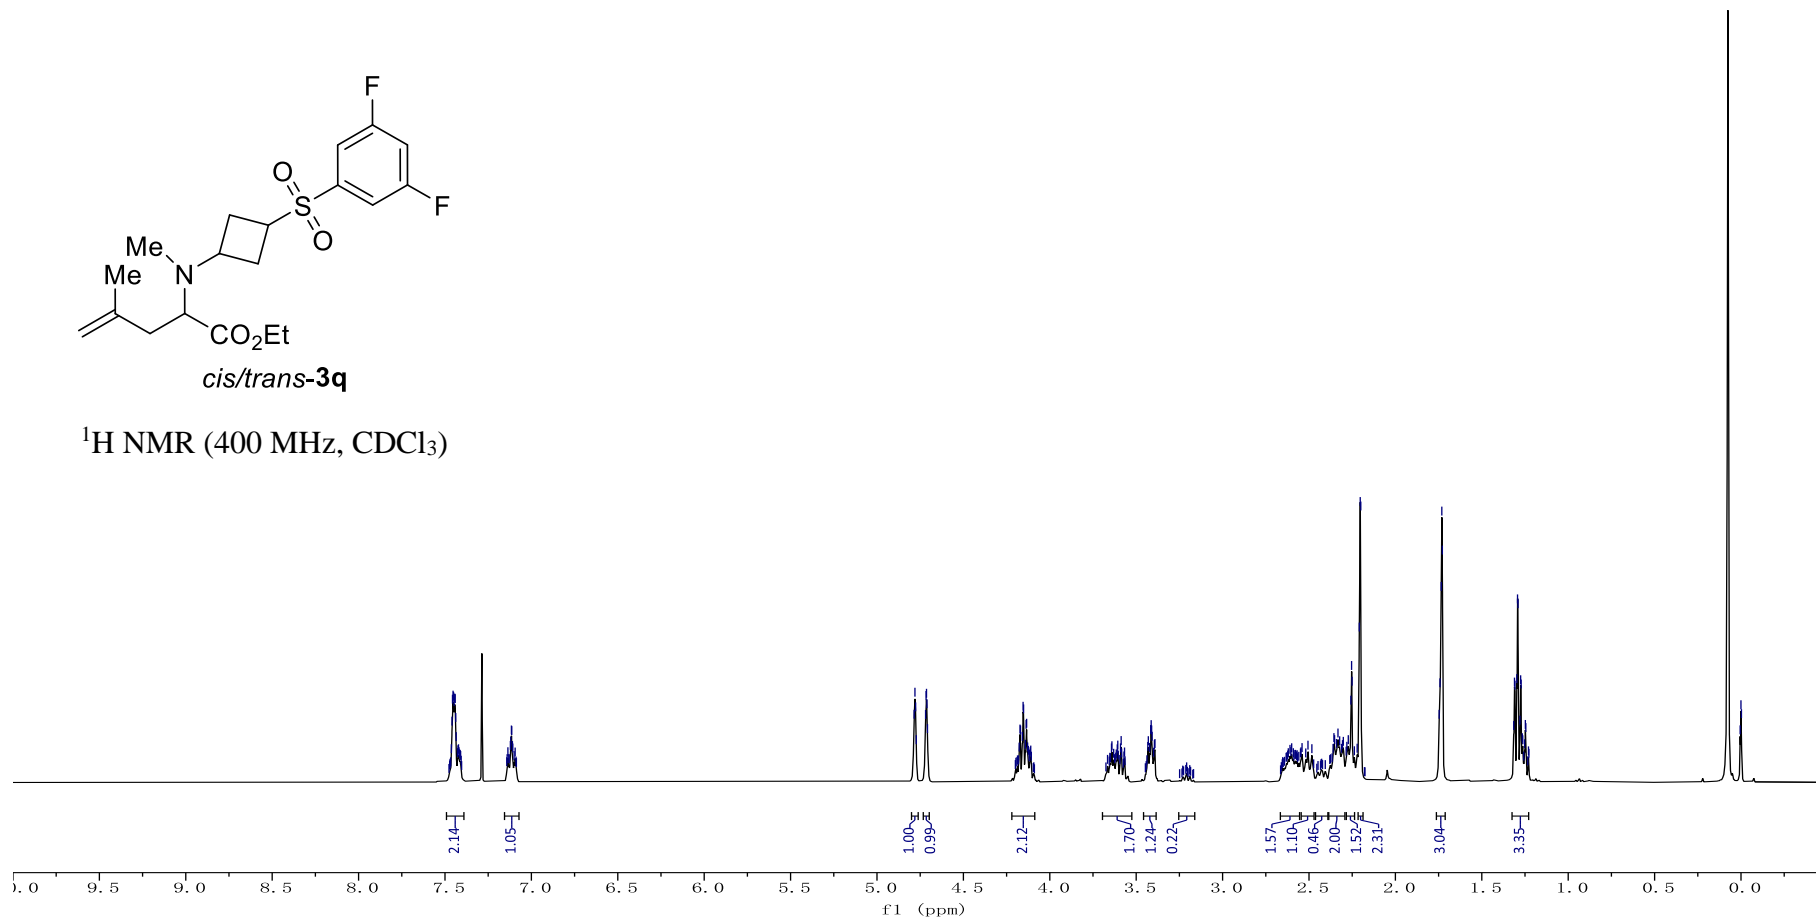

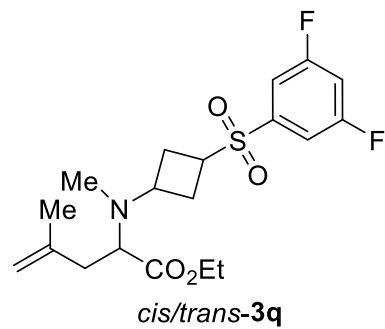

$^{13}\text{C}$  NMR (100 MHz,  $\text{CDCl}_3$ )

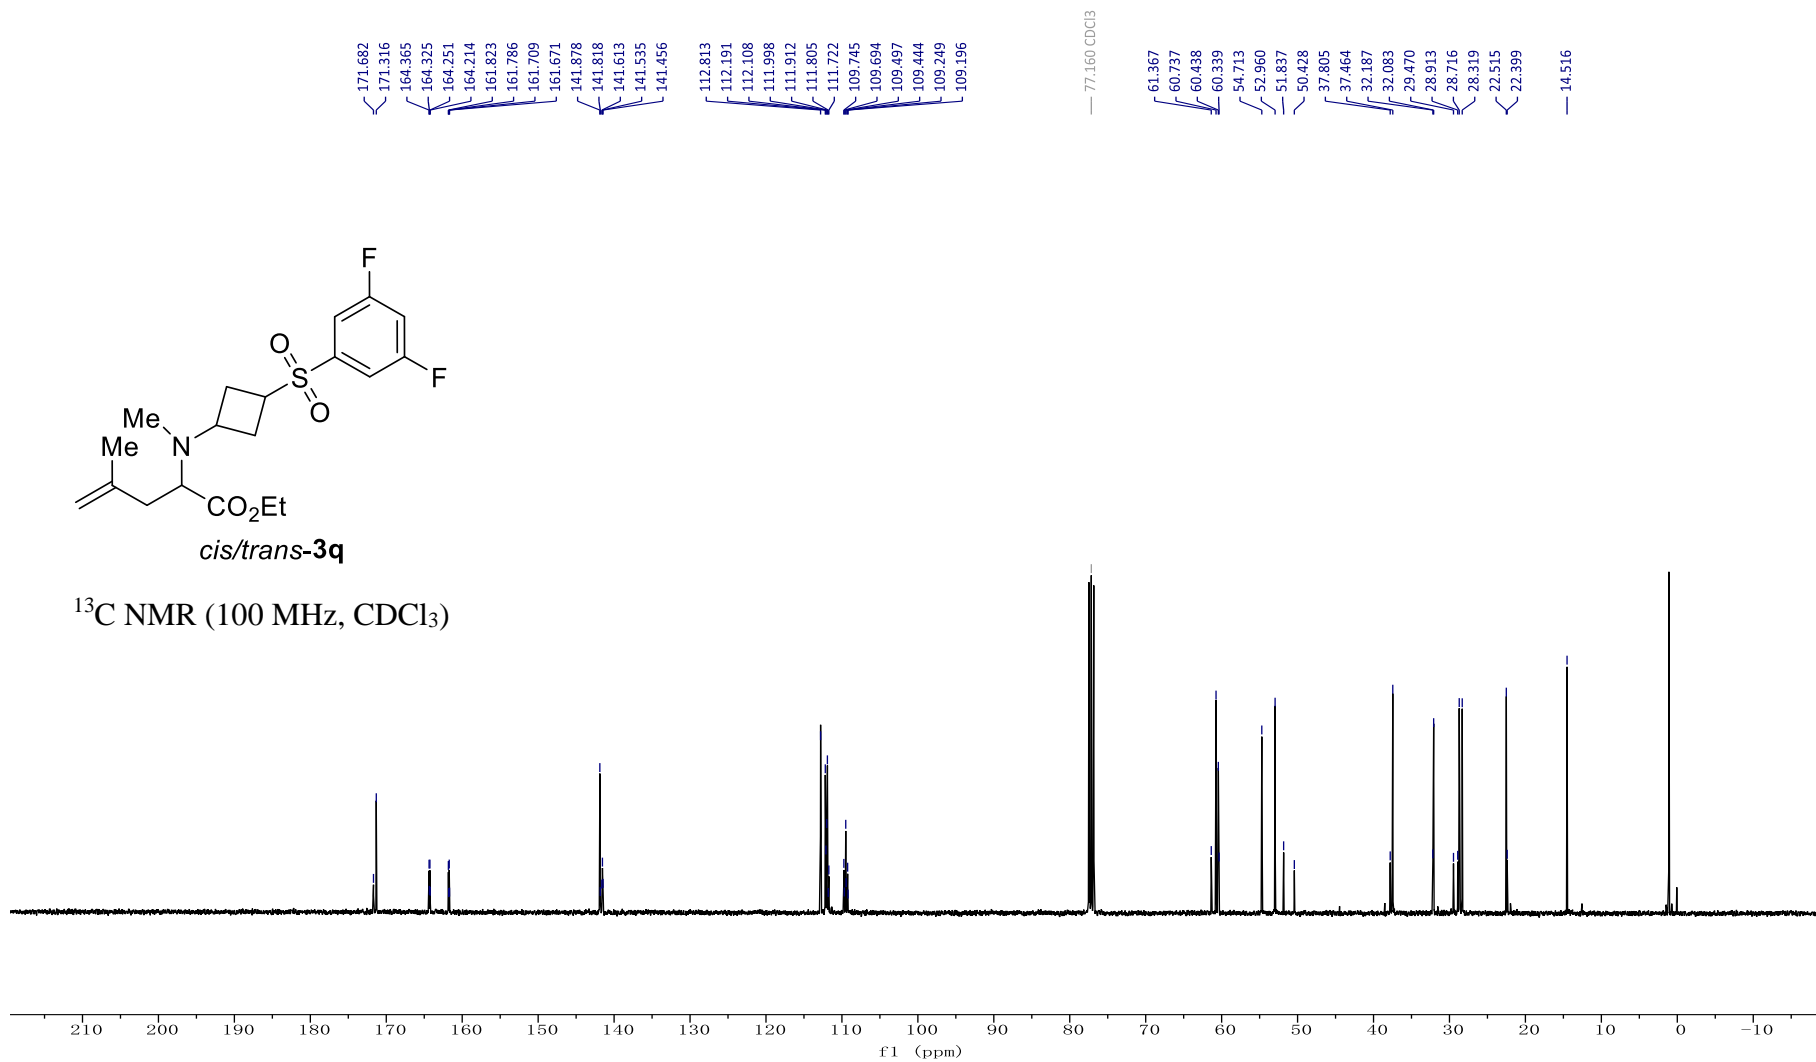

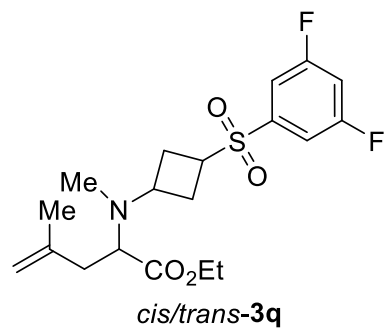

$^{19}\text{F}$  NMR (376 MHz,  $\text{CDCl}_3$ )

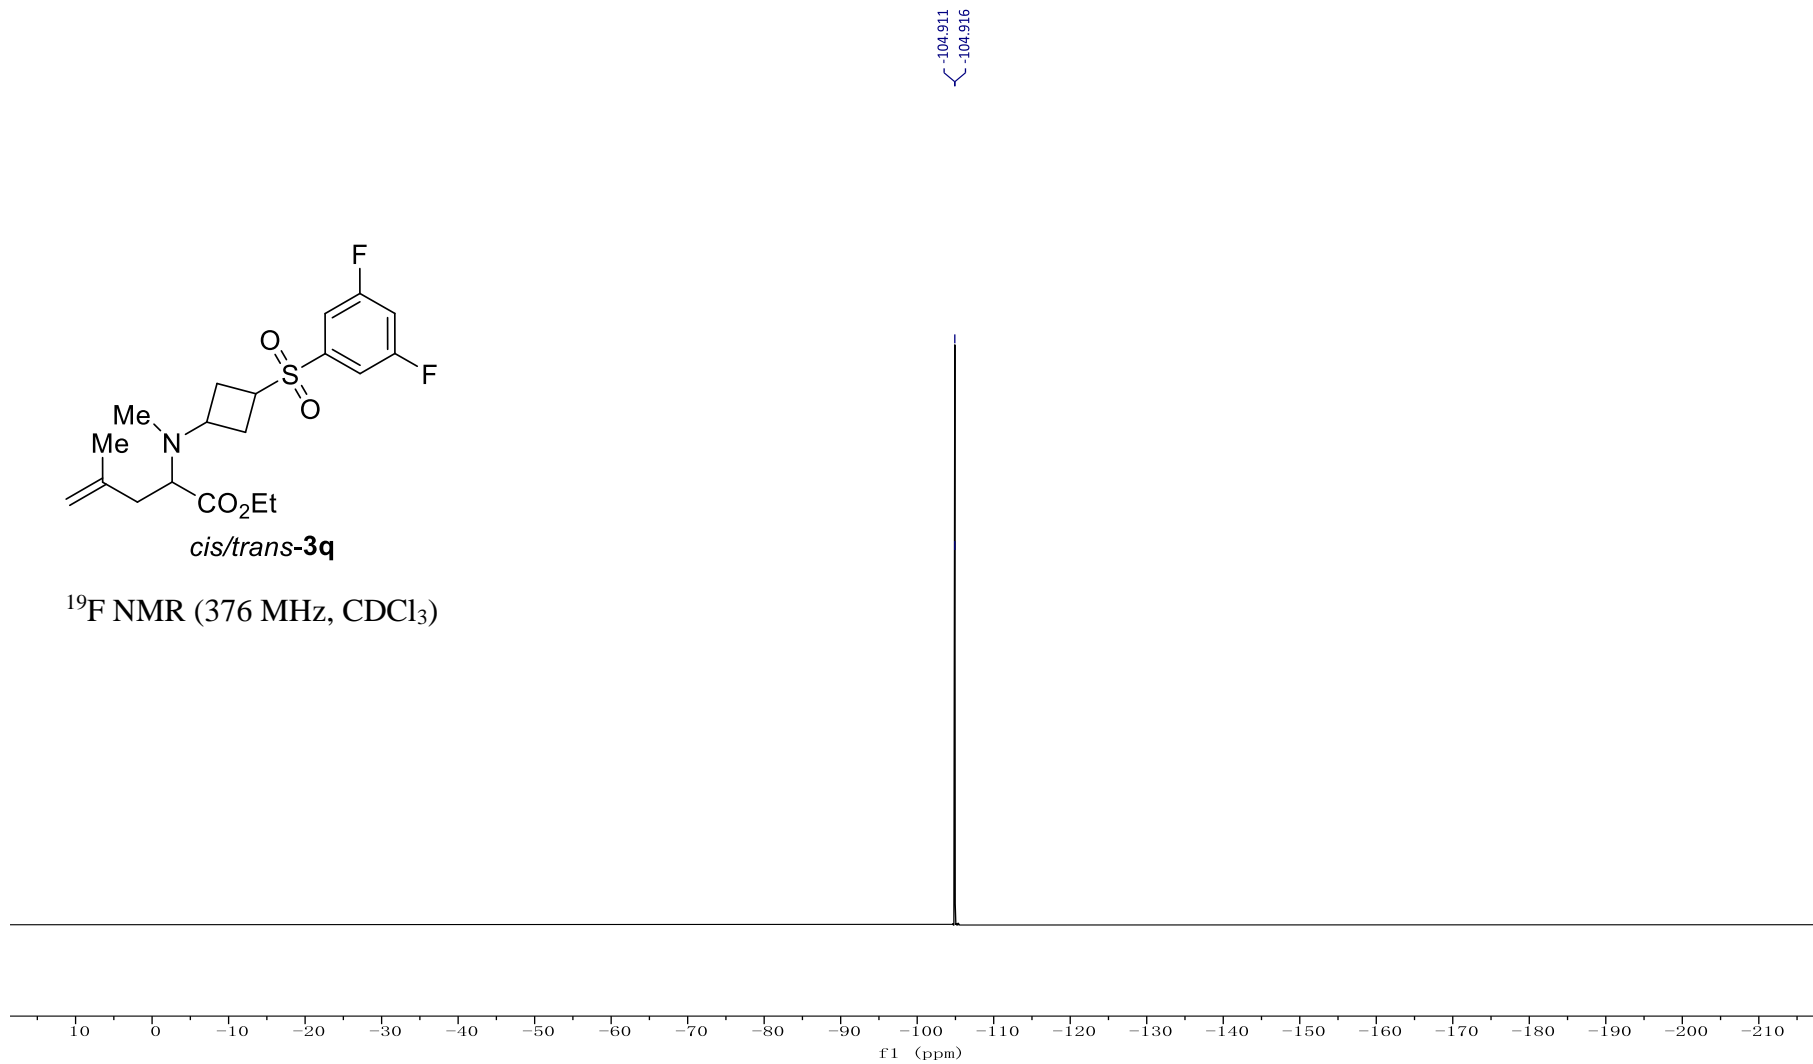

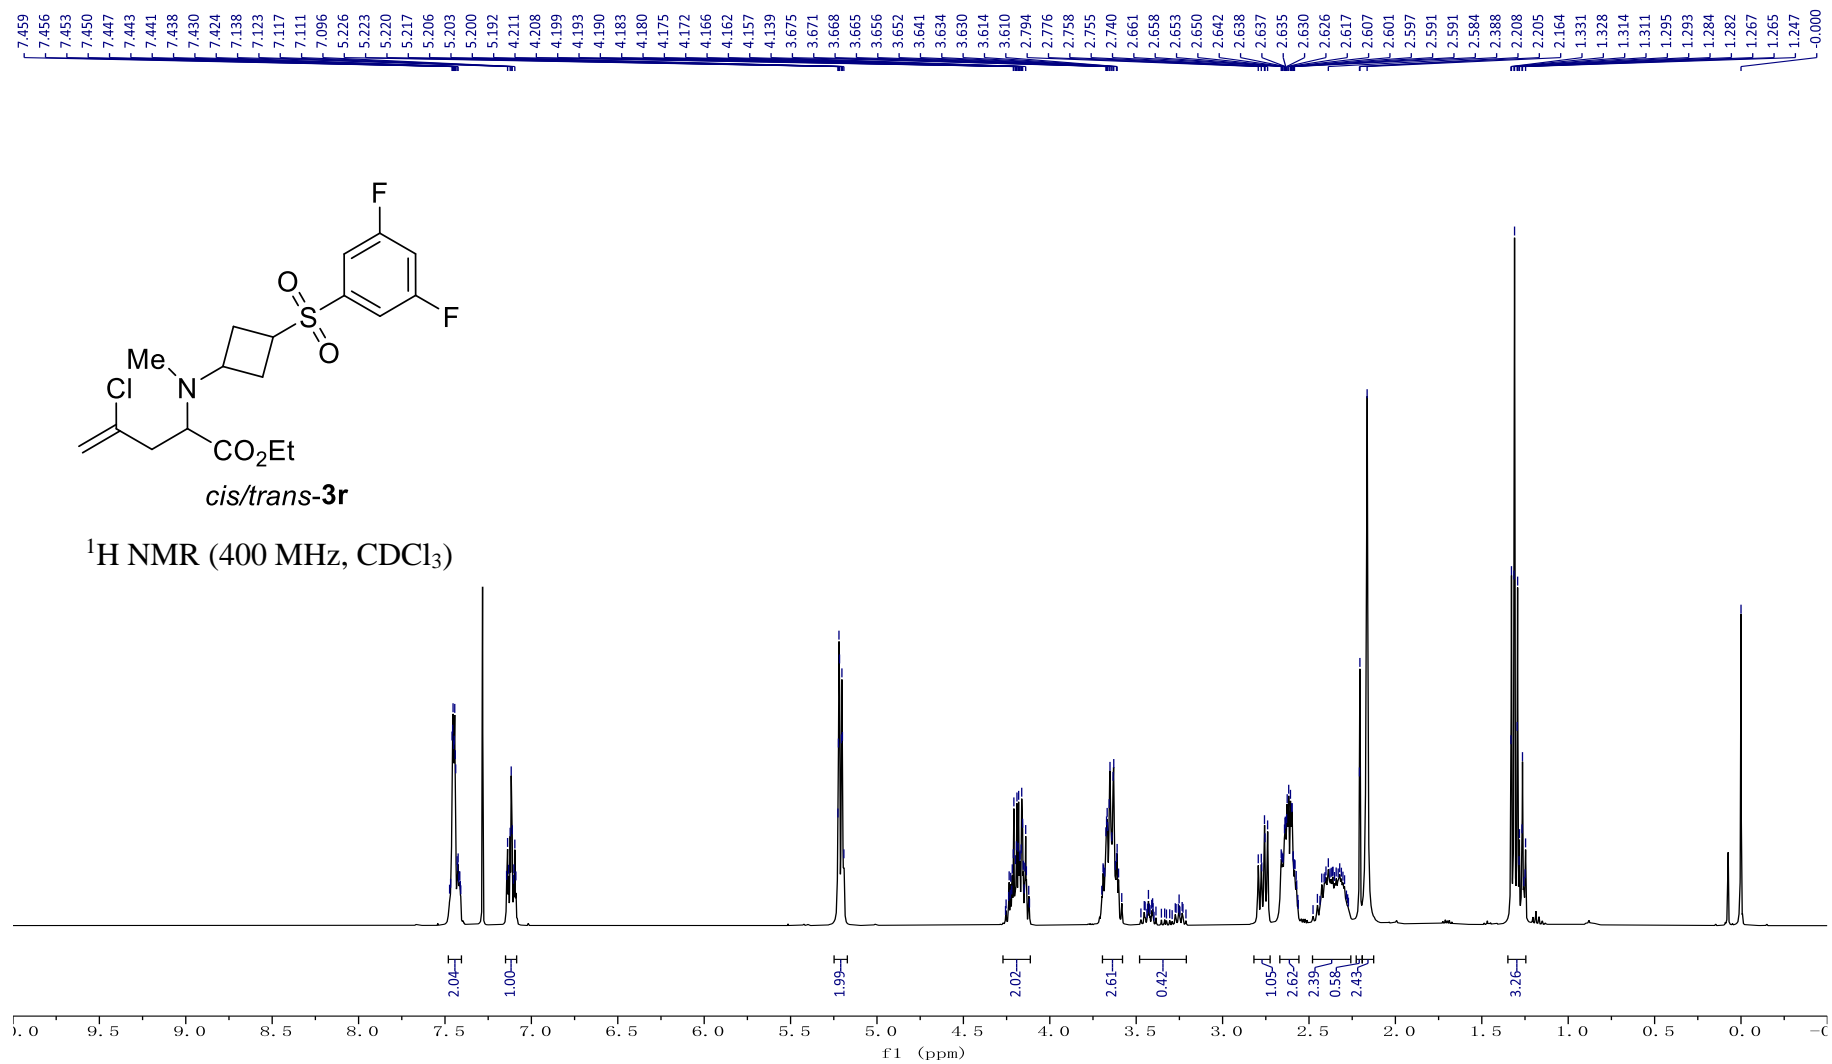

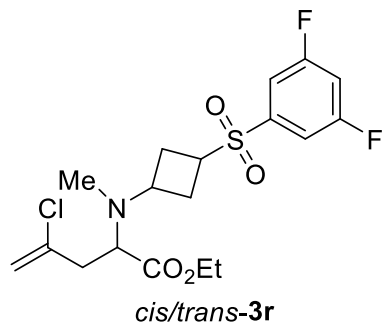

$^{13}\text{C}$  NMR (100 MHz,  $\text{CDCl}_3$ )

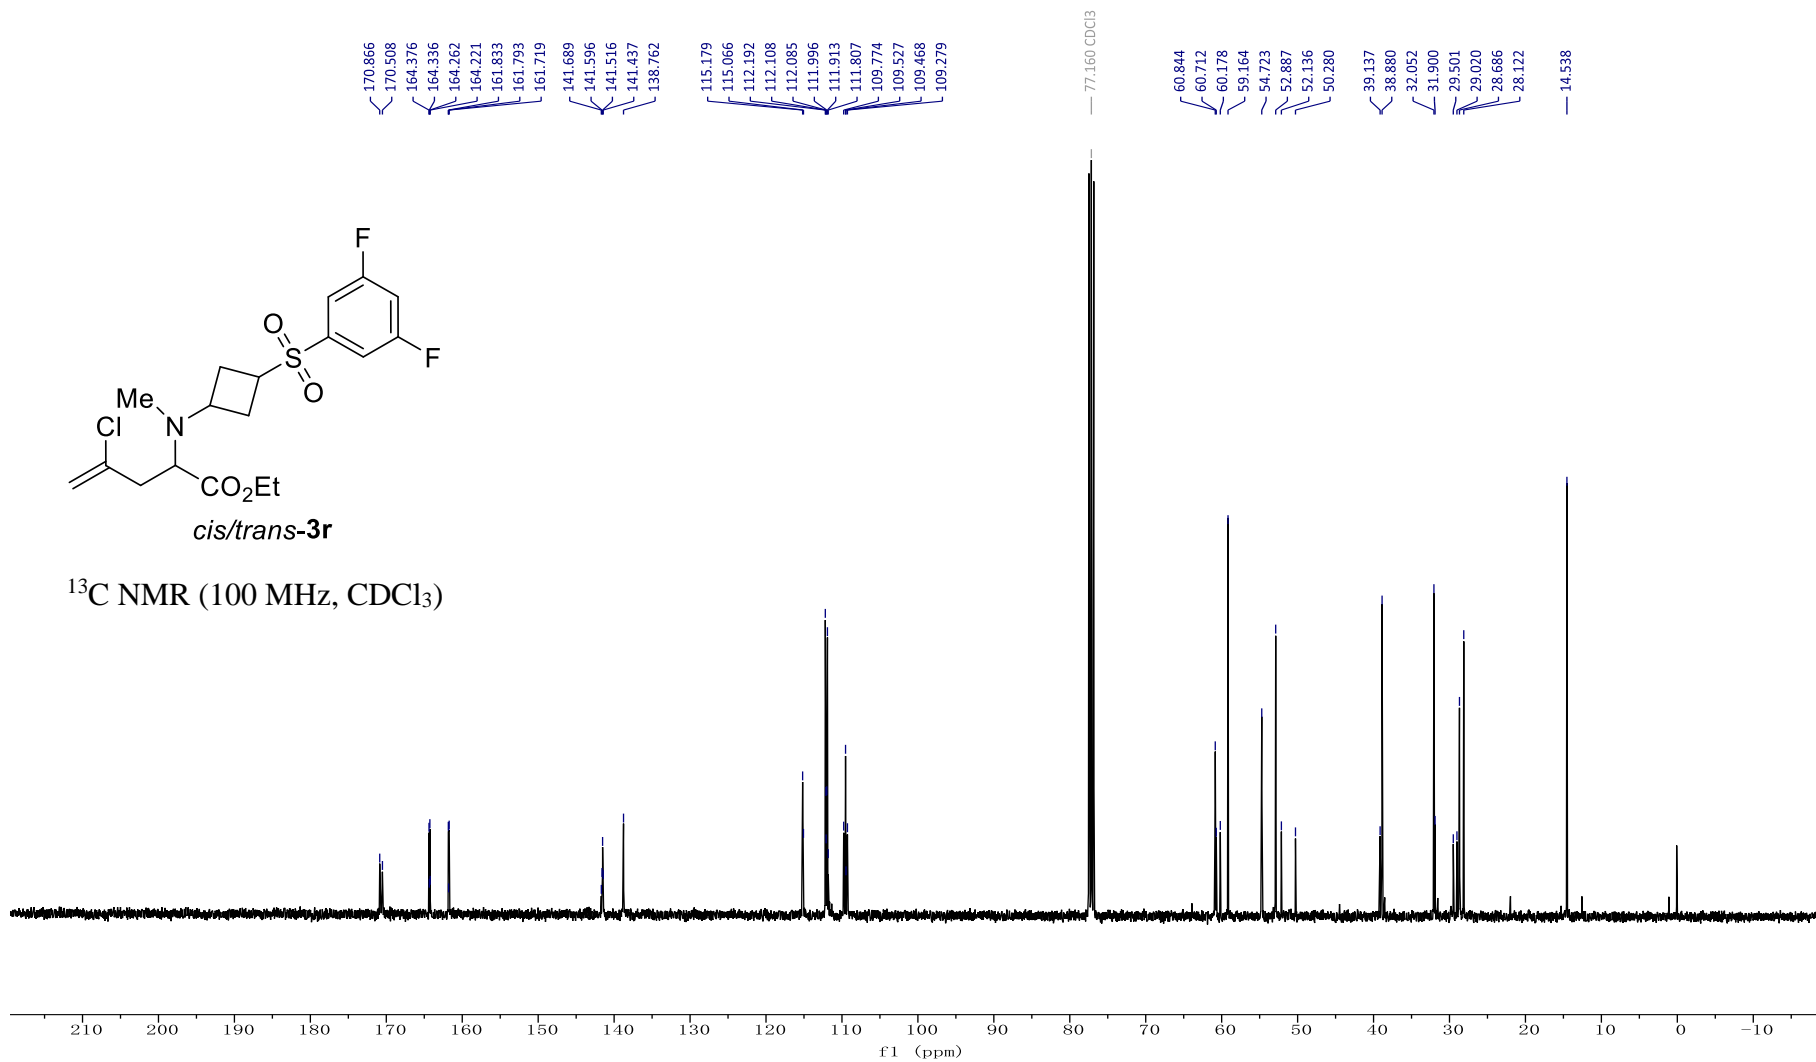



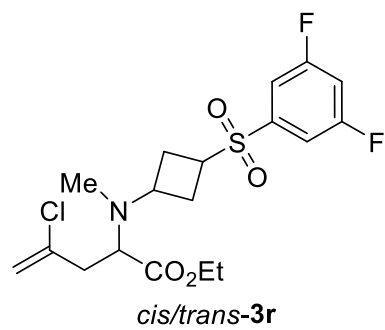

$^{19}\text{F}$  NMR (376 MHz,  $\text{CDCl}_3$ )

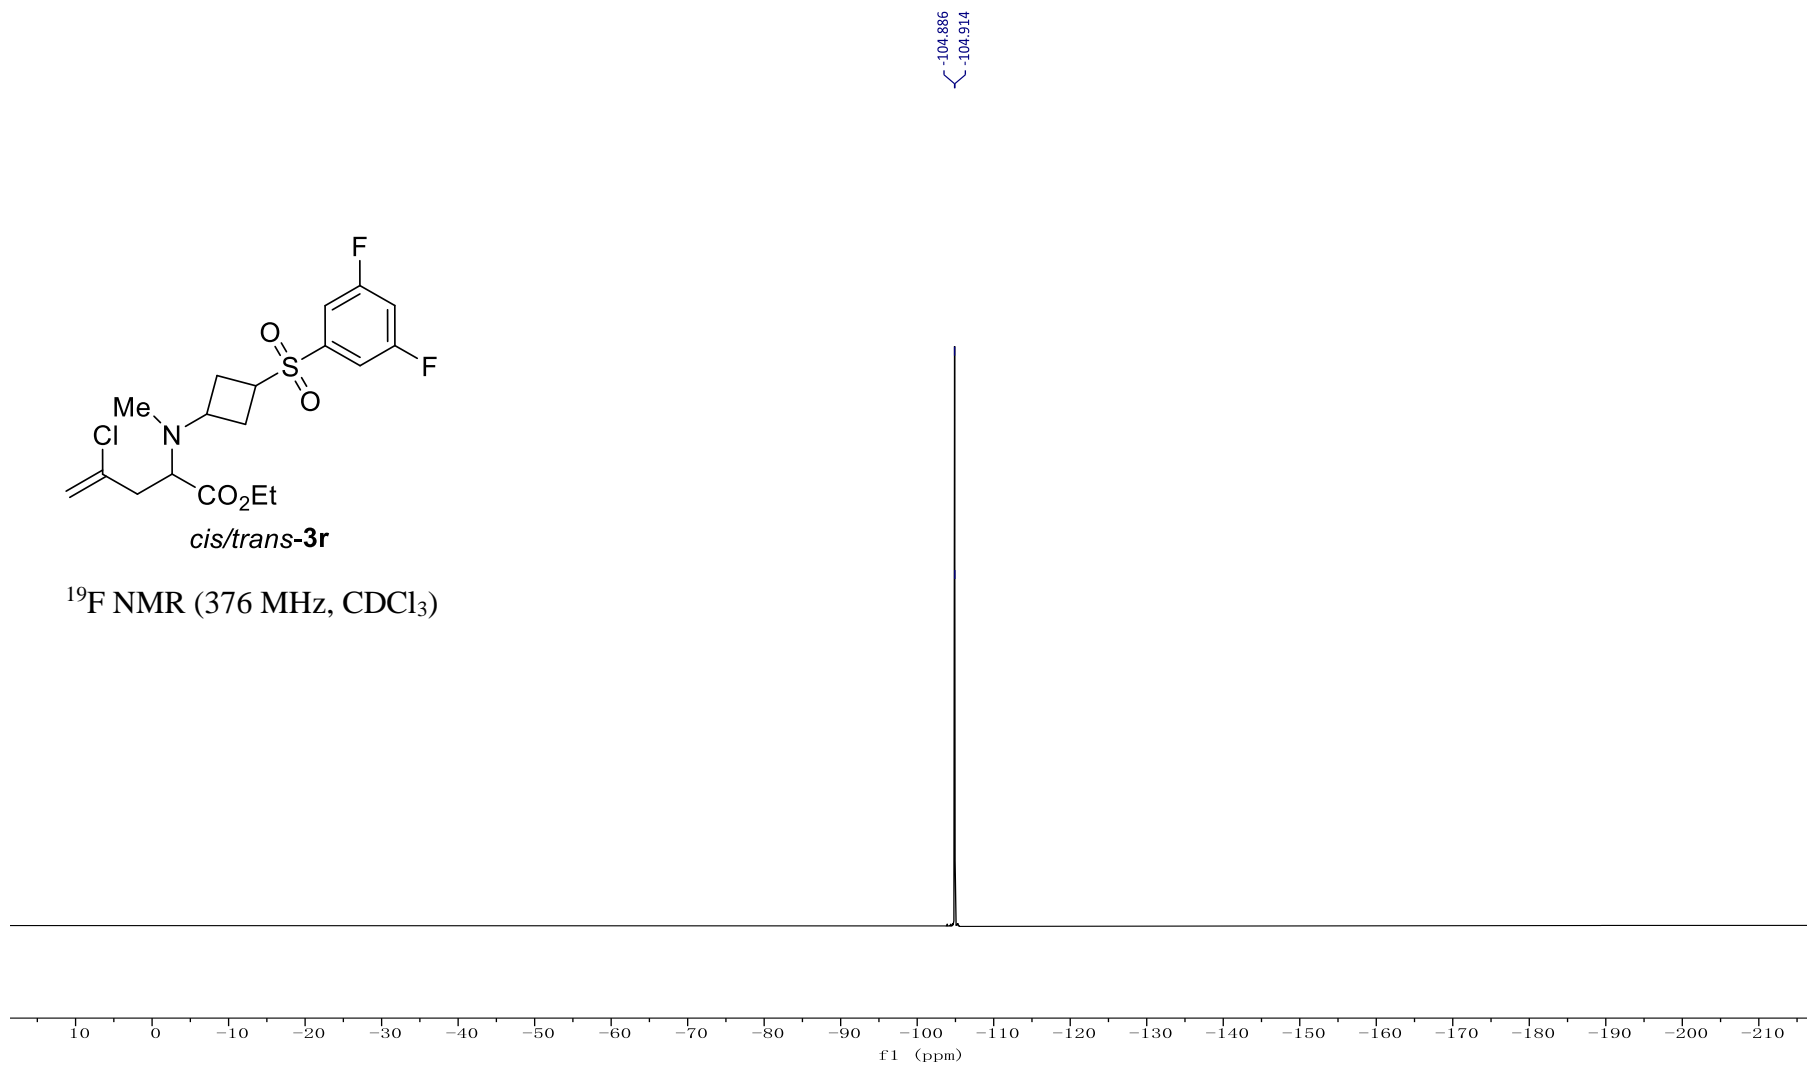

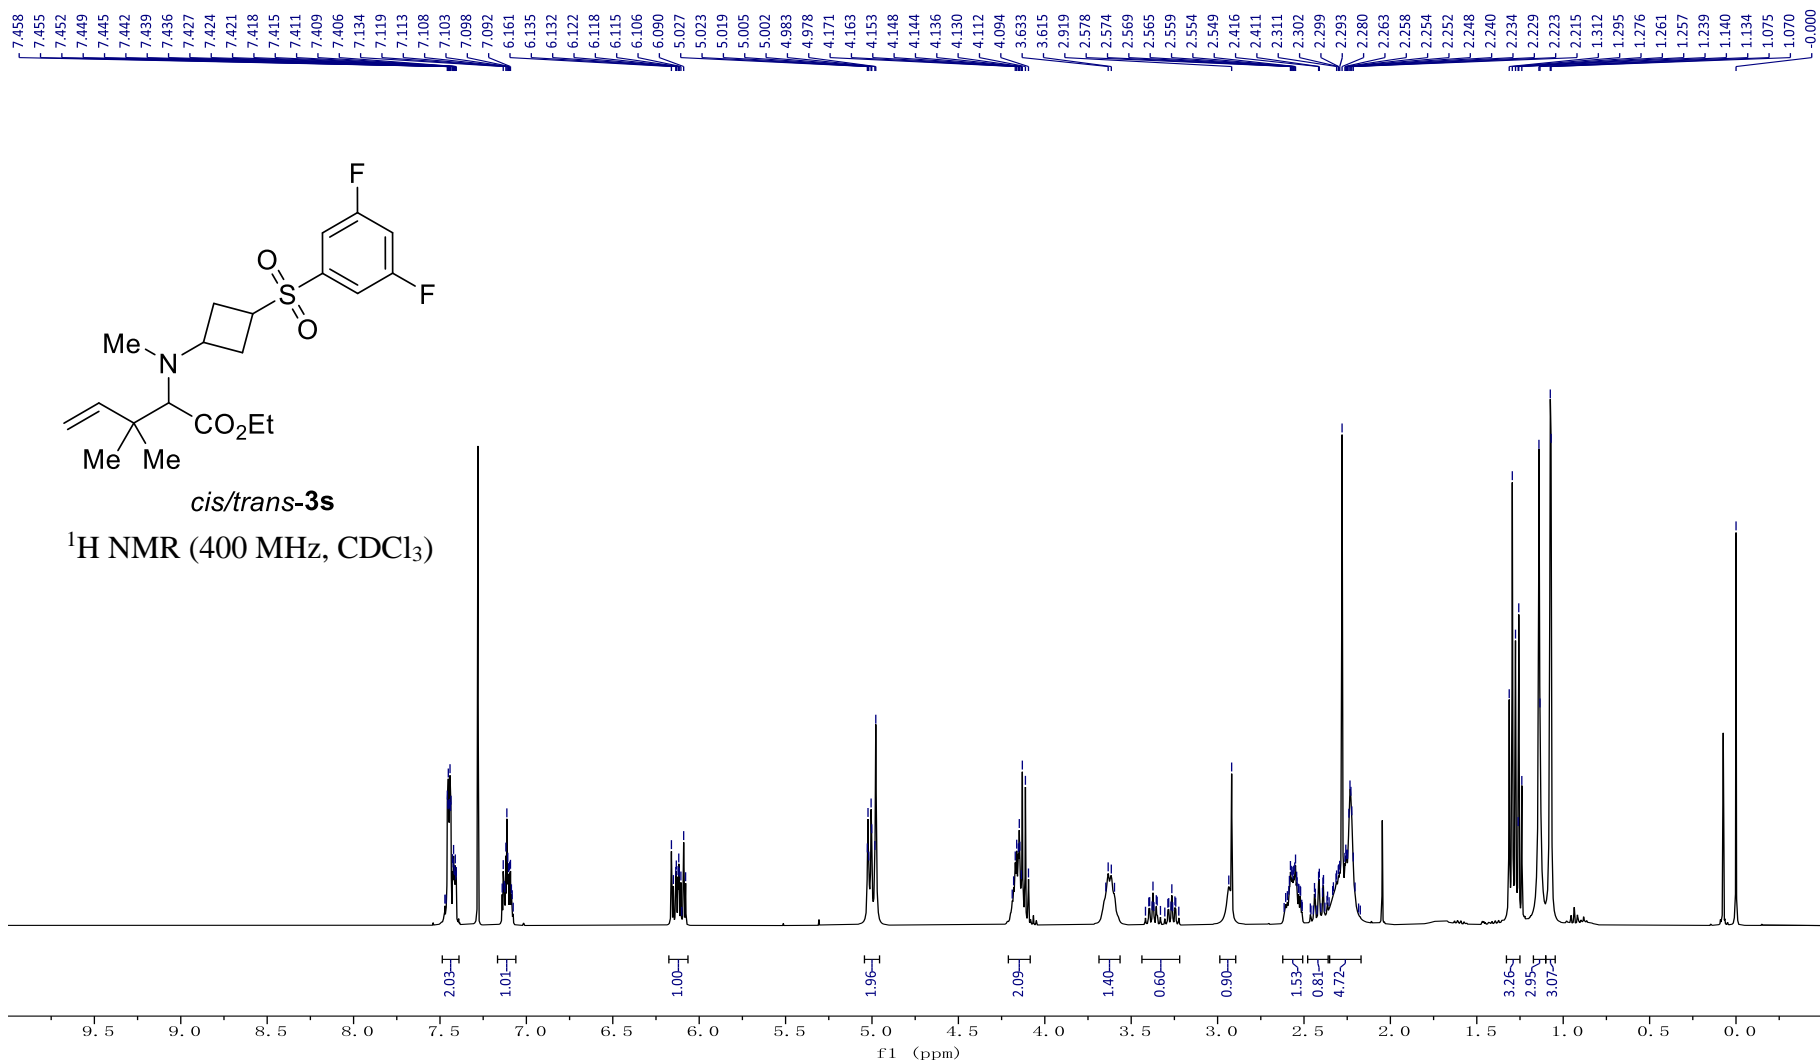

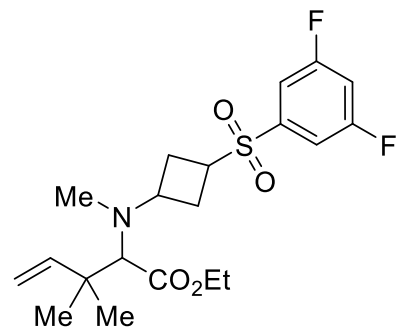

*cis/trans-3s*

$^{13}\text{C}$  NMR (100 MHz,  $\text{CDCl}_3$ )

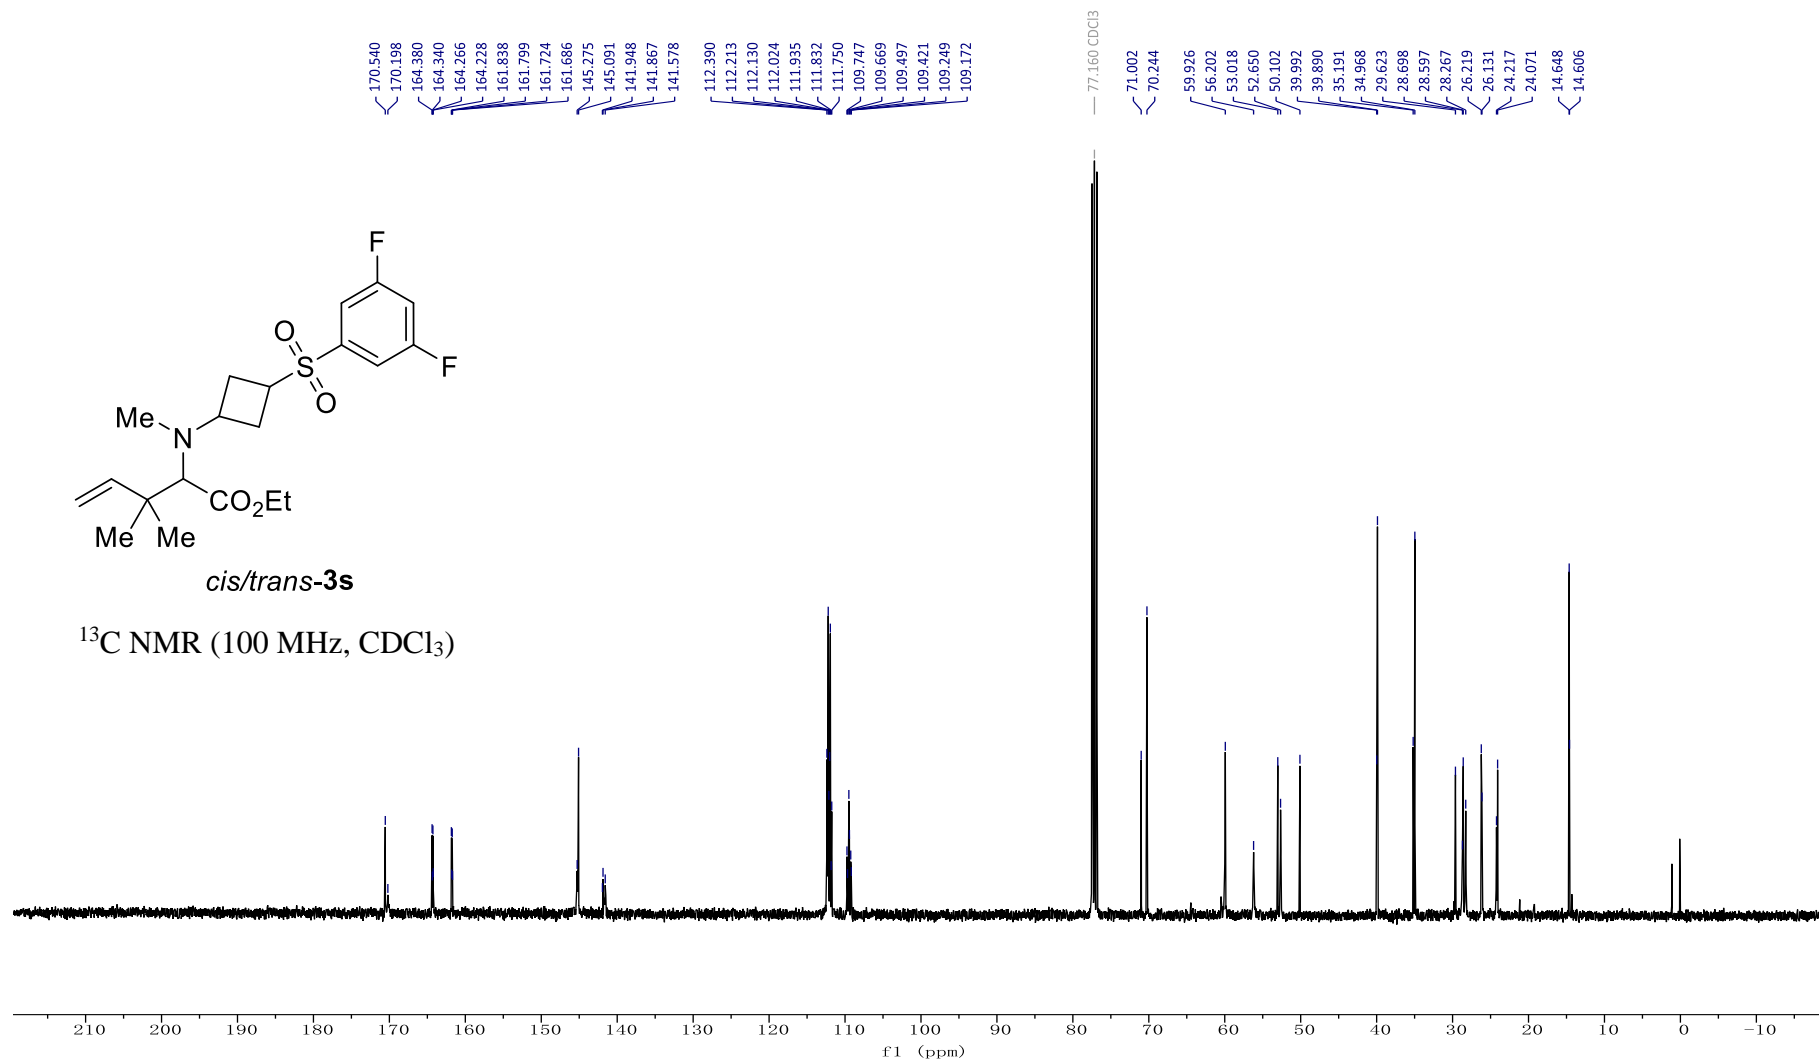

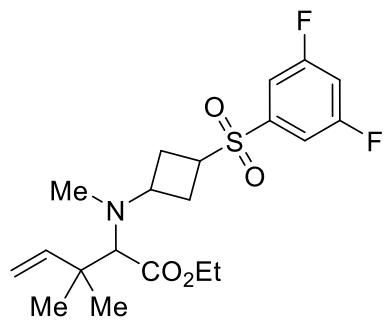

*cis/trans-3s*

<sup>19</sup>F NMR (376 MHz, CDCl<sub>3</sub>)

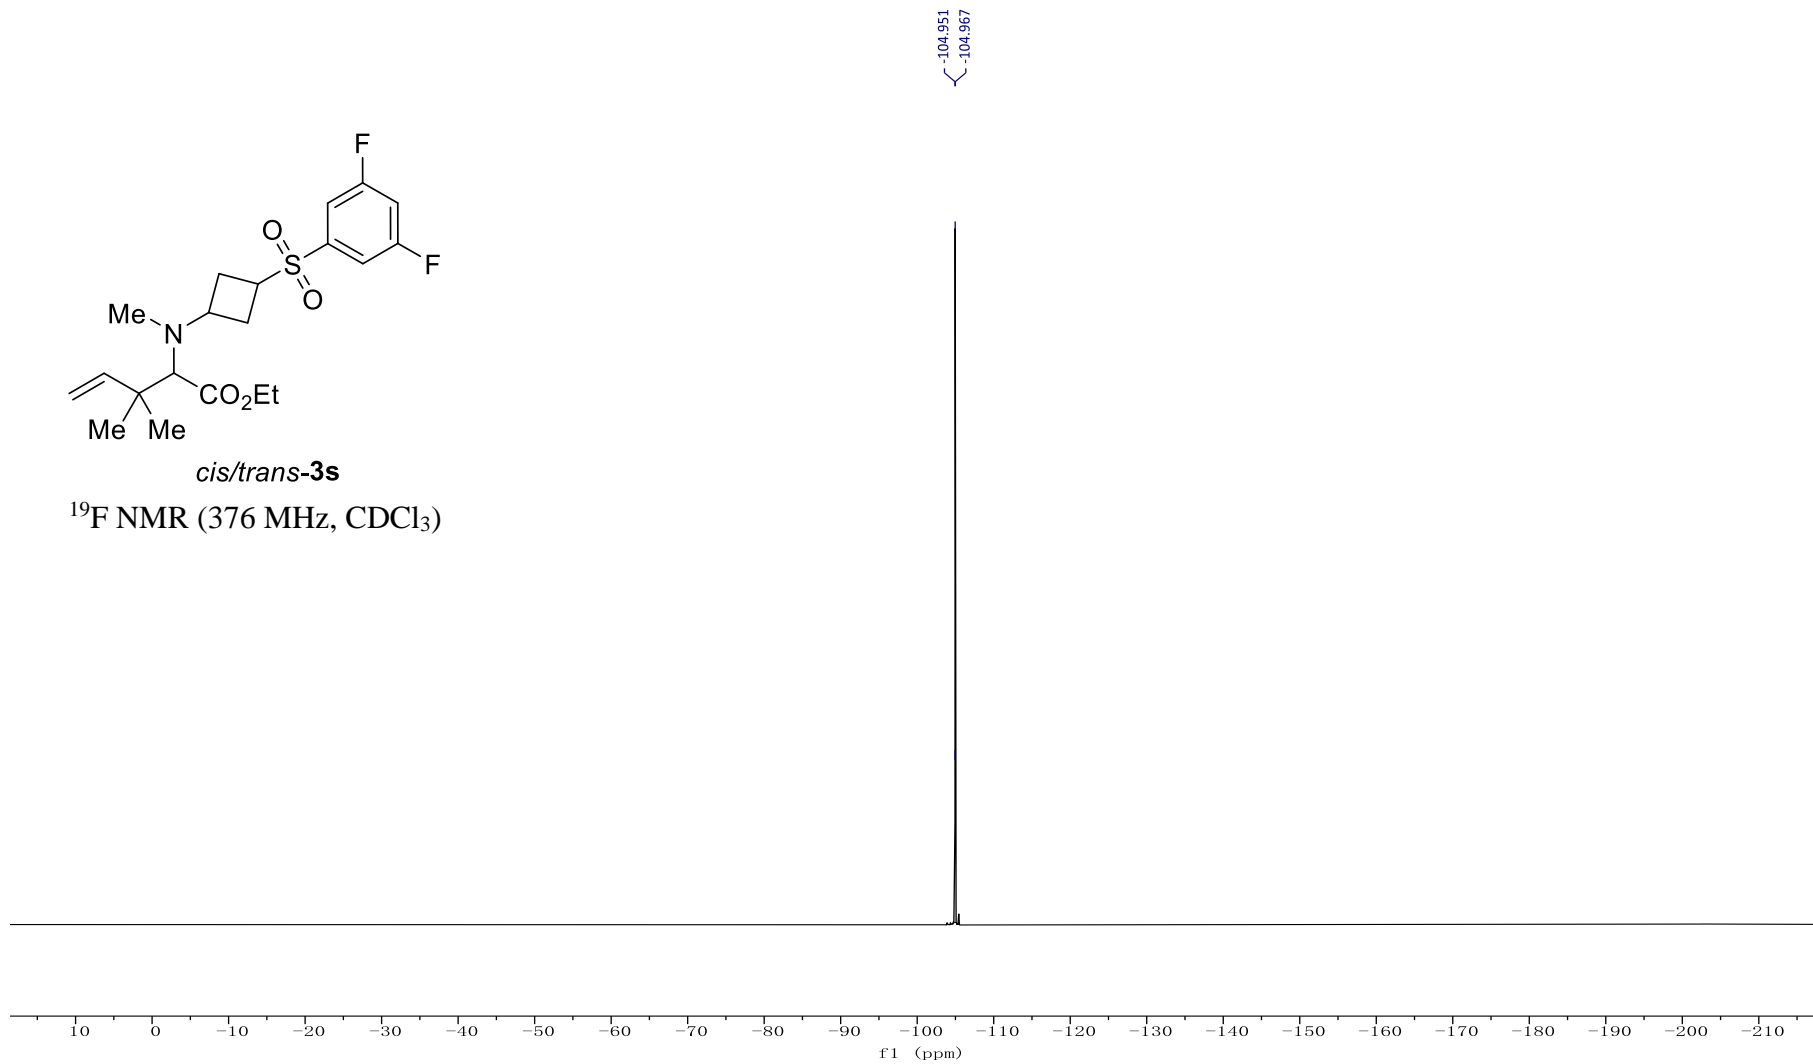

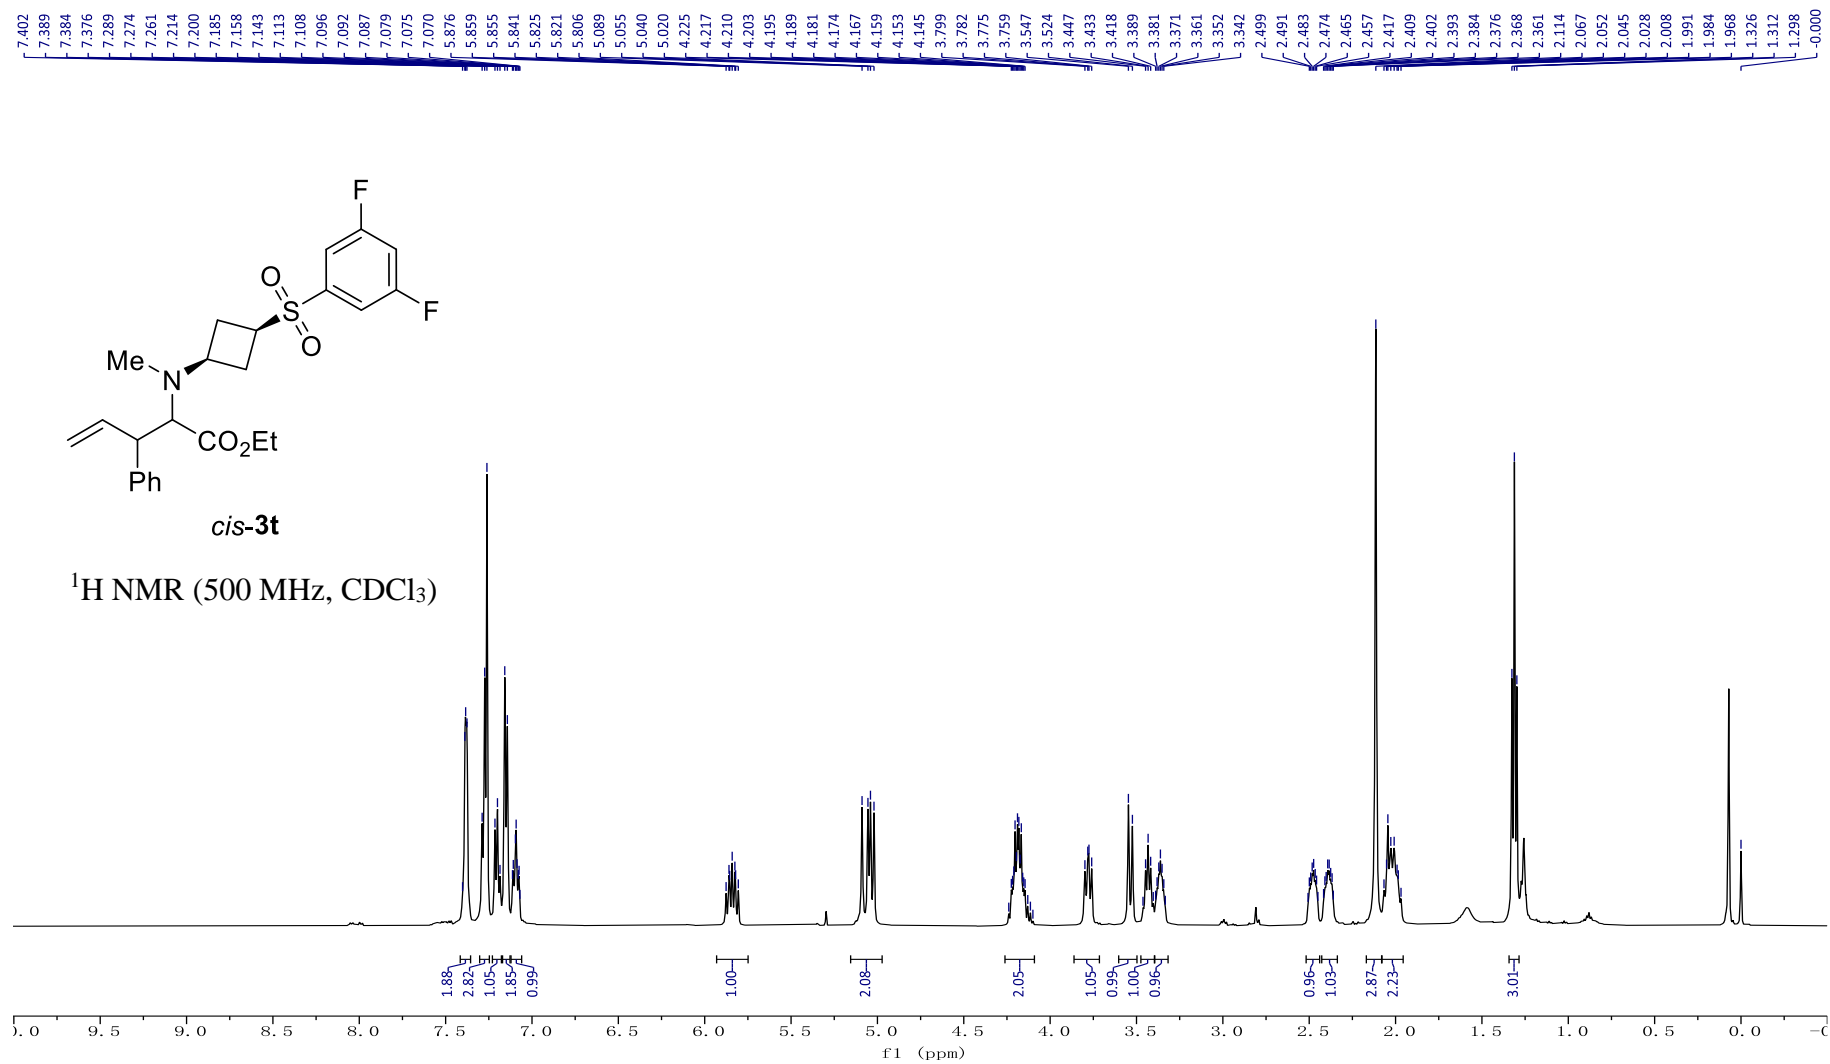

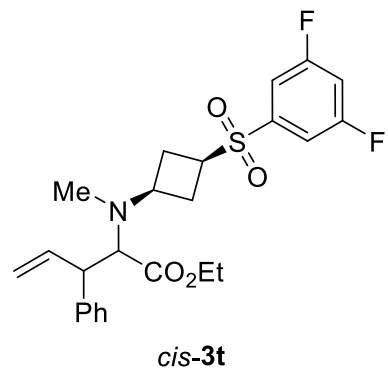

$^{13}\text{C}$  NMR (125 MHz,  $\text{CDCl}_3$ )

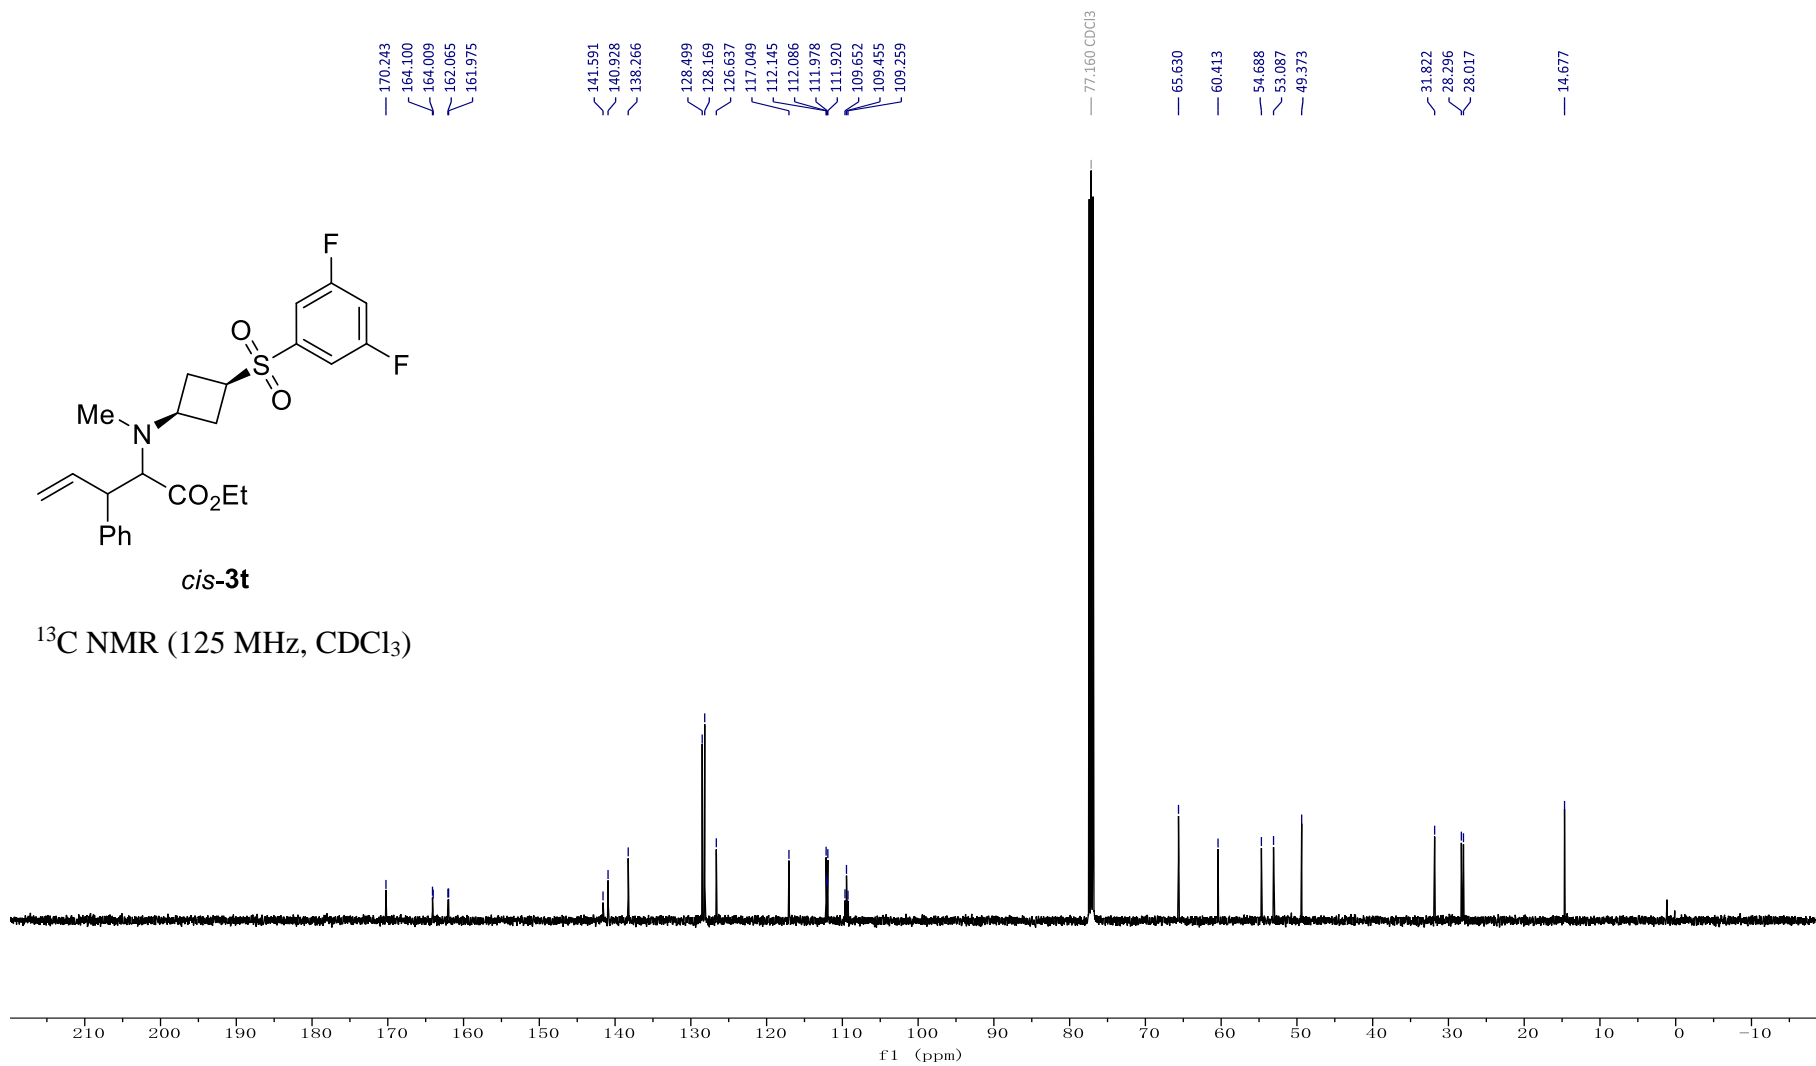

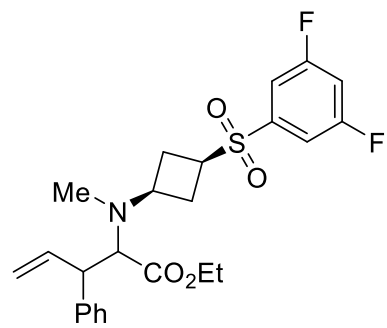

*cis-3t*

<sup>19</sup>F NMR (471 MHz, CDCl<sub>3</sub>)

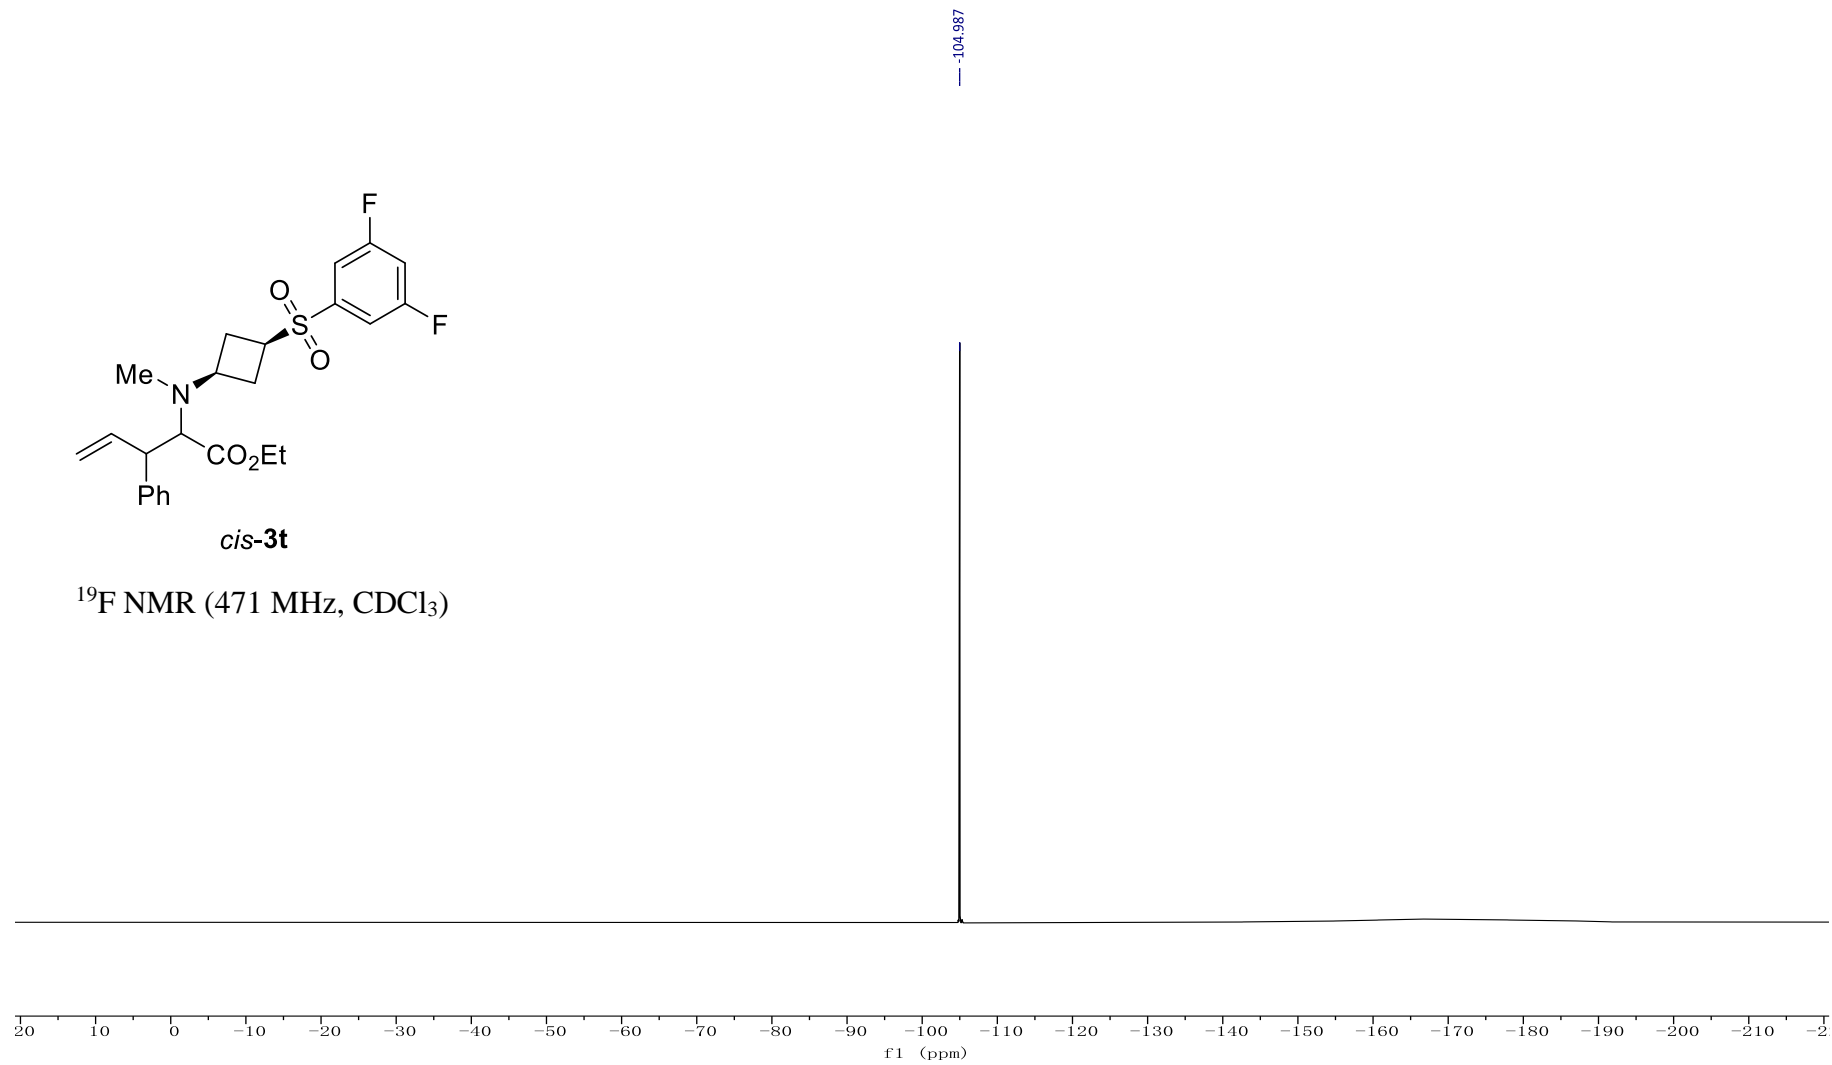

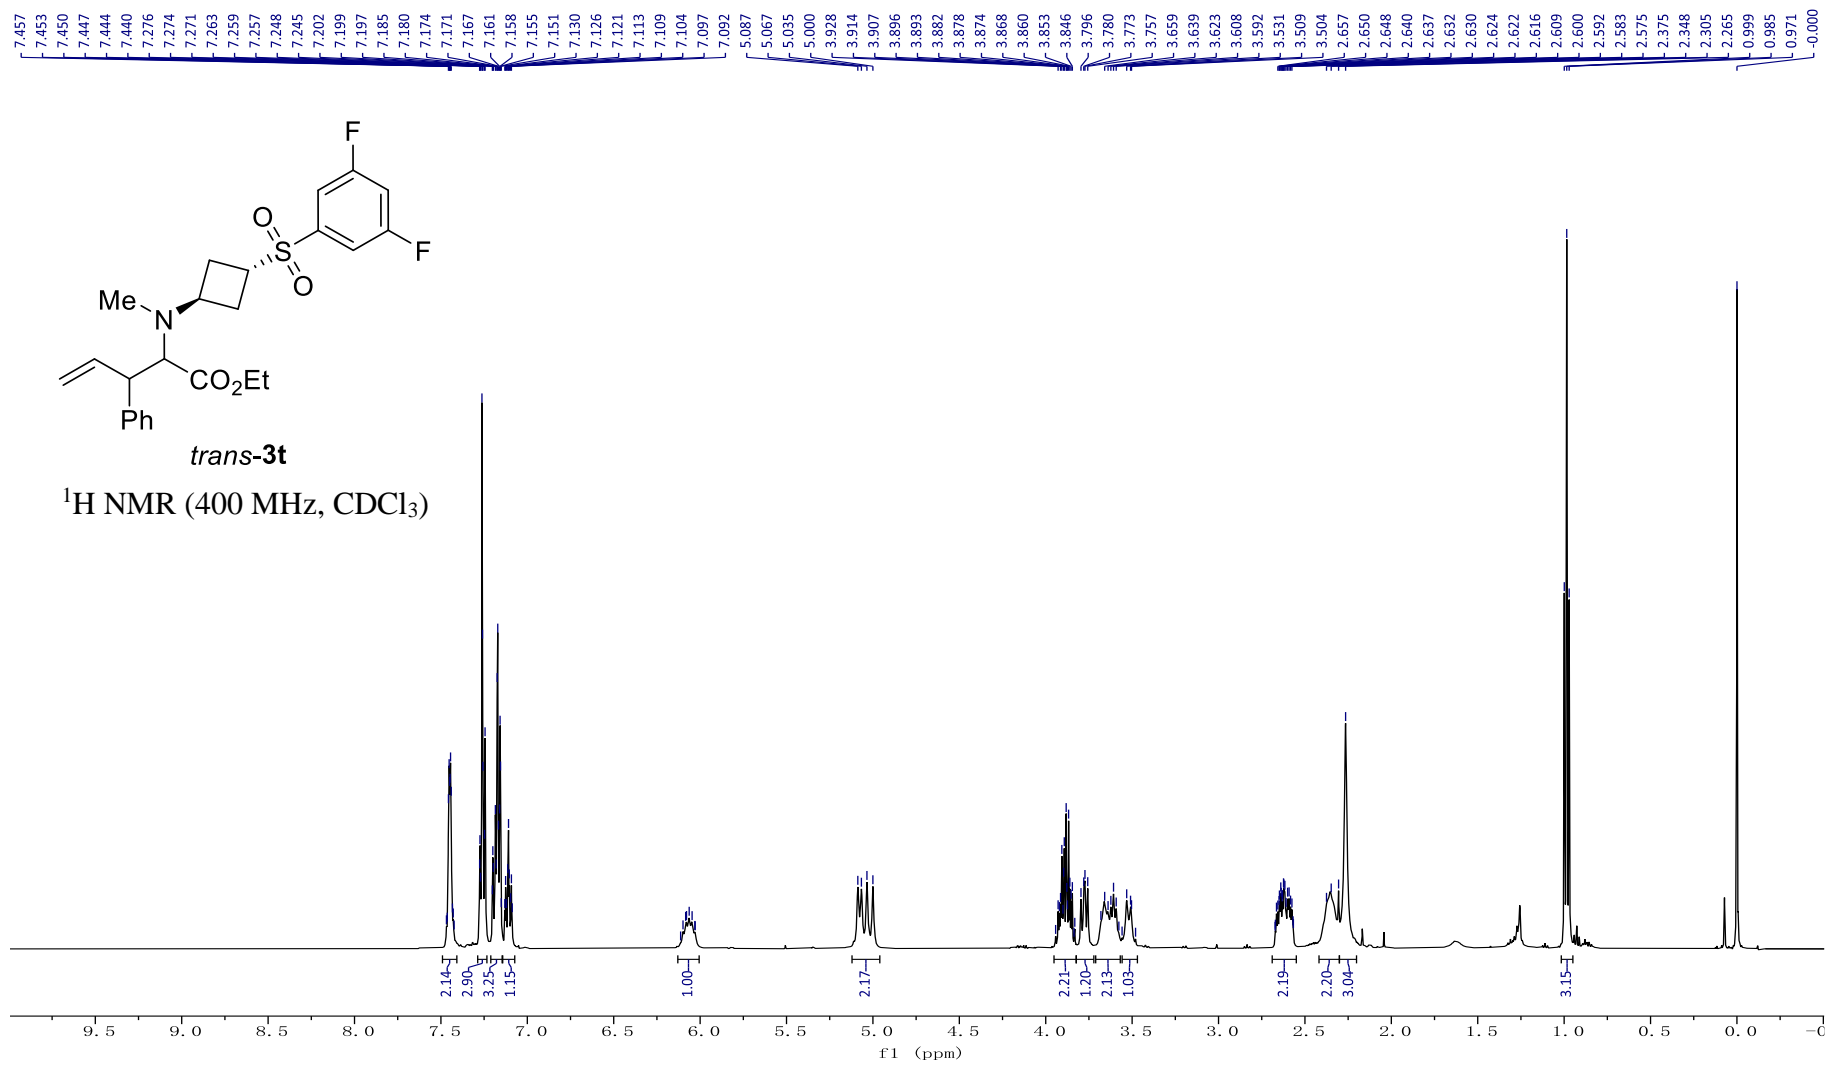



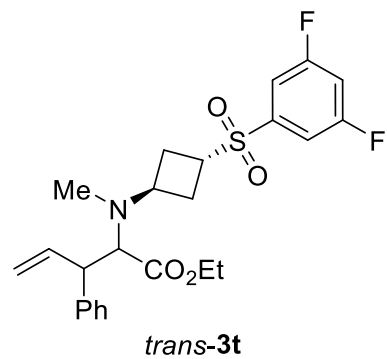

$^{13}\text{C}$  NMR (100 MHz,  $\text{CDCl}_3$ )

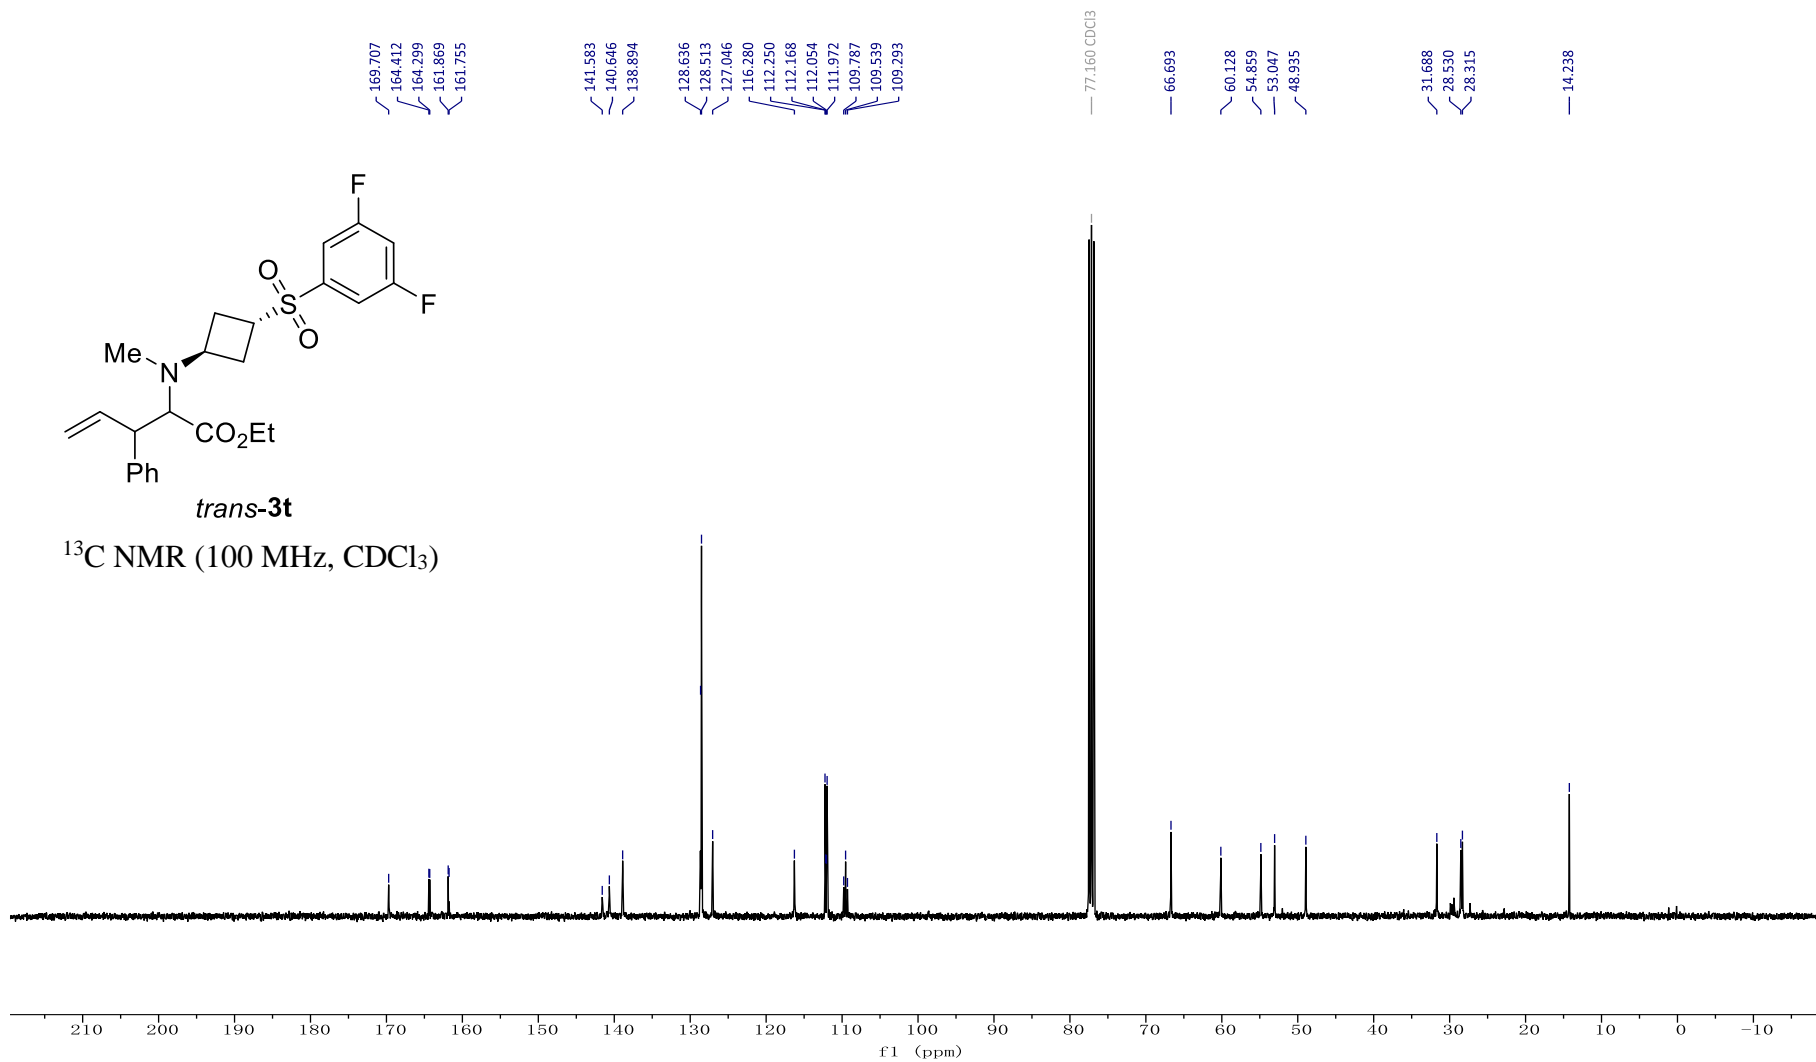

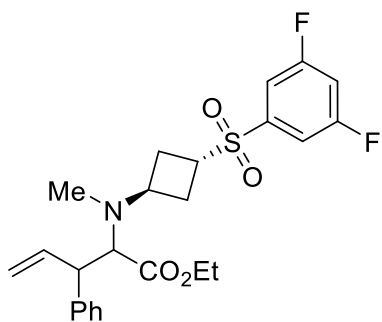

*trans*-3t

<sup>19</sup>F NMR (376 MHz, CDCl<sub>3</sub>)

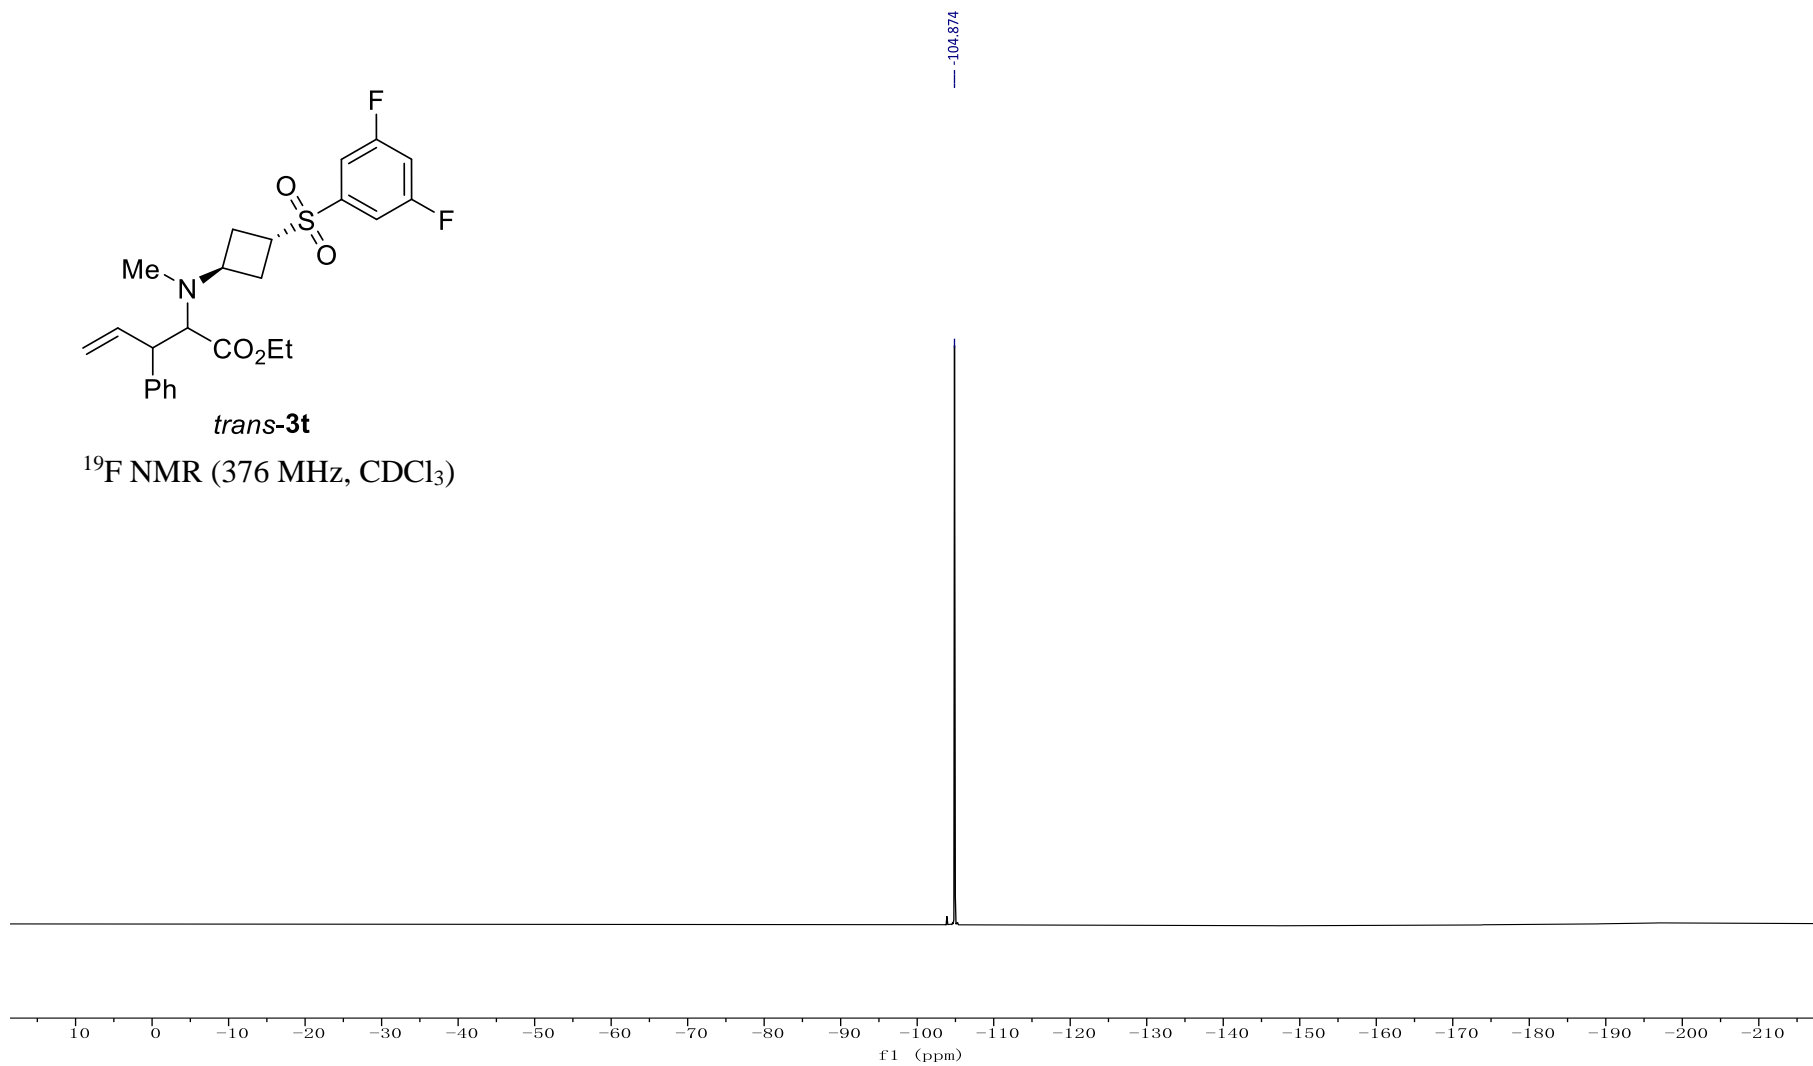

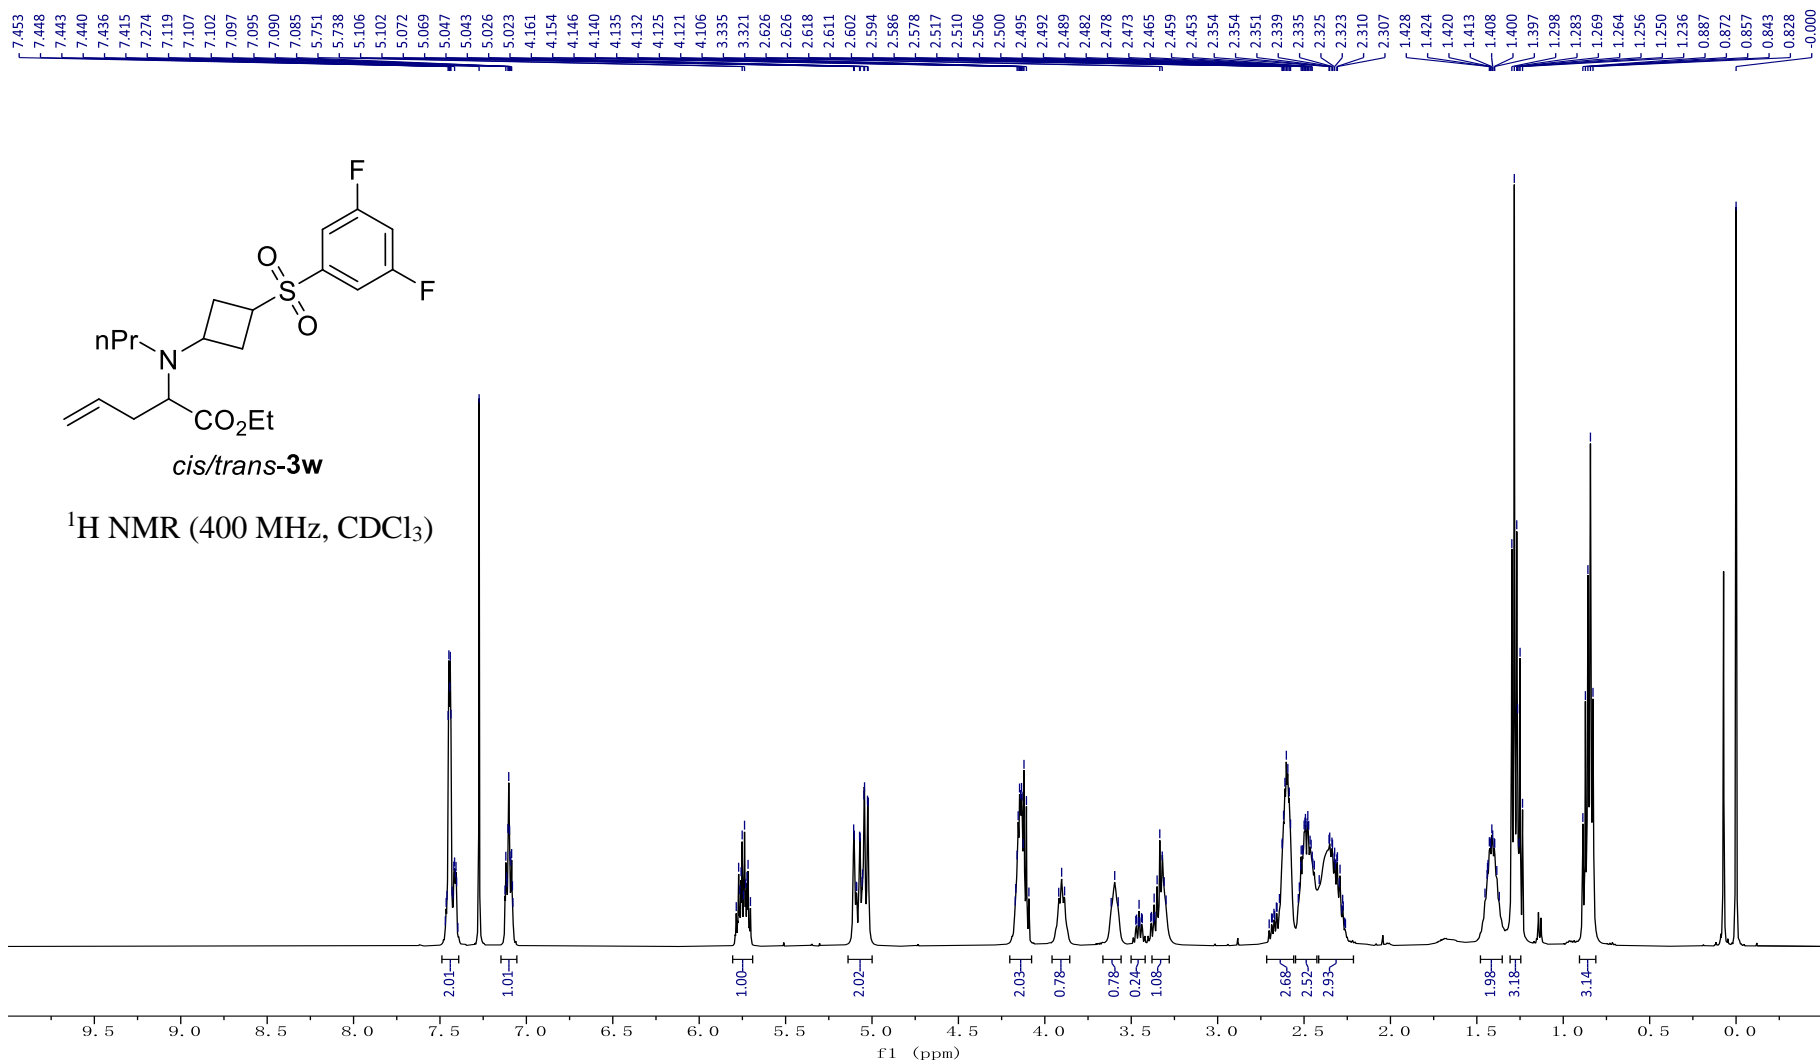

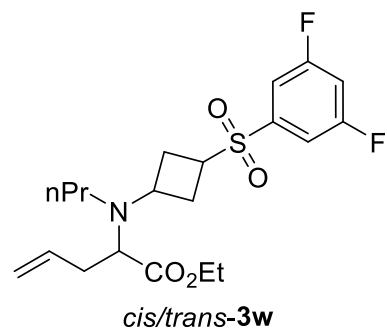

$^{13}\text{C}$  NMR (100 MHz,  $\text{CDCl}_3$ )

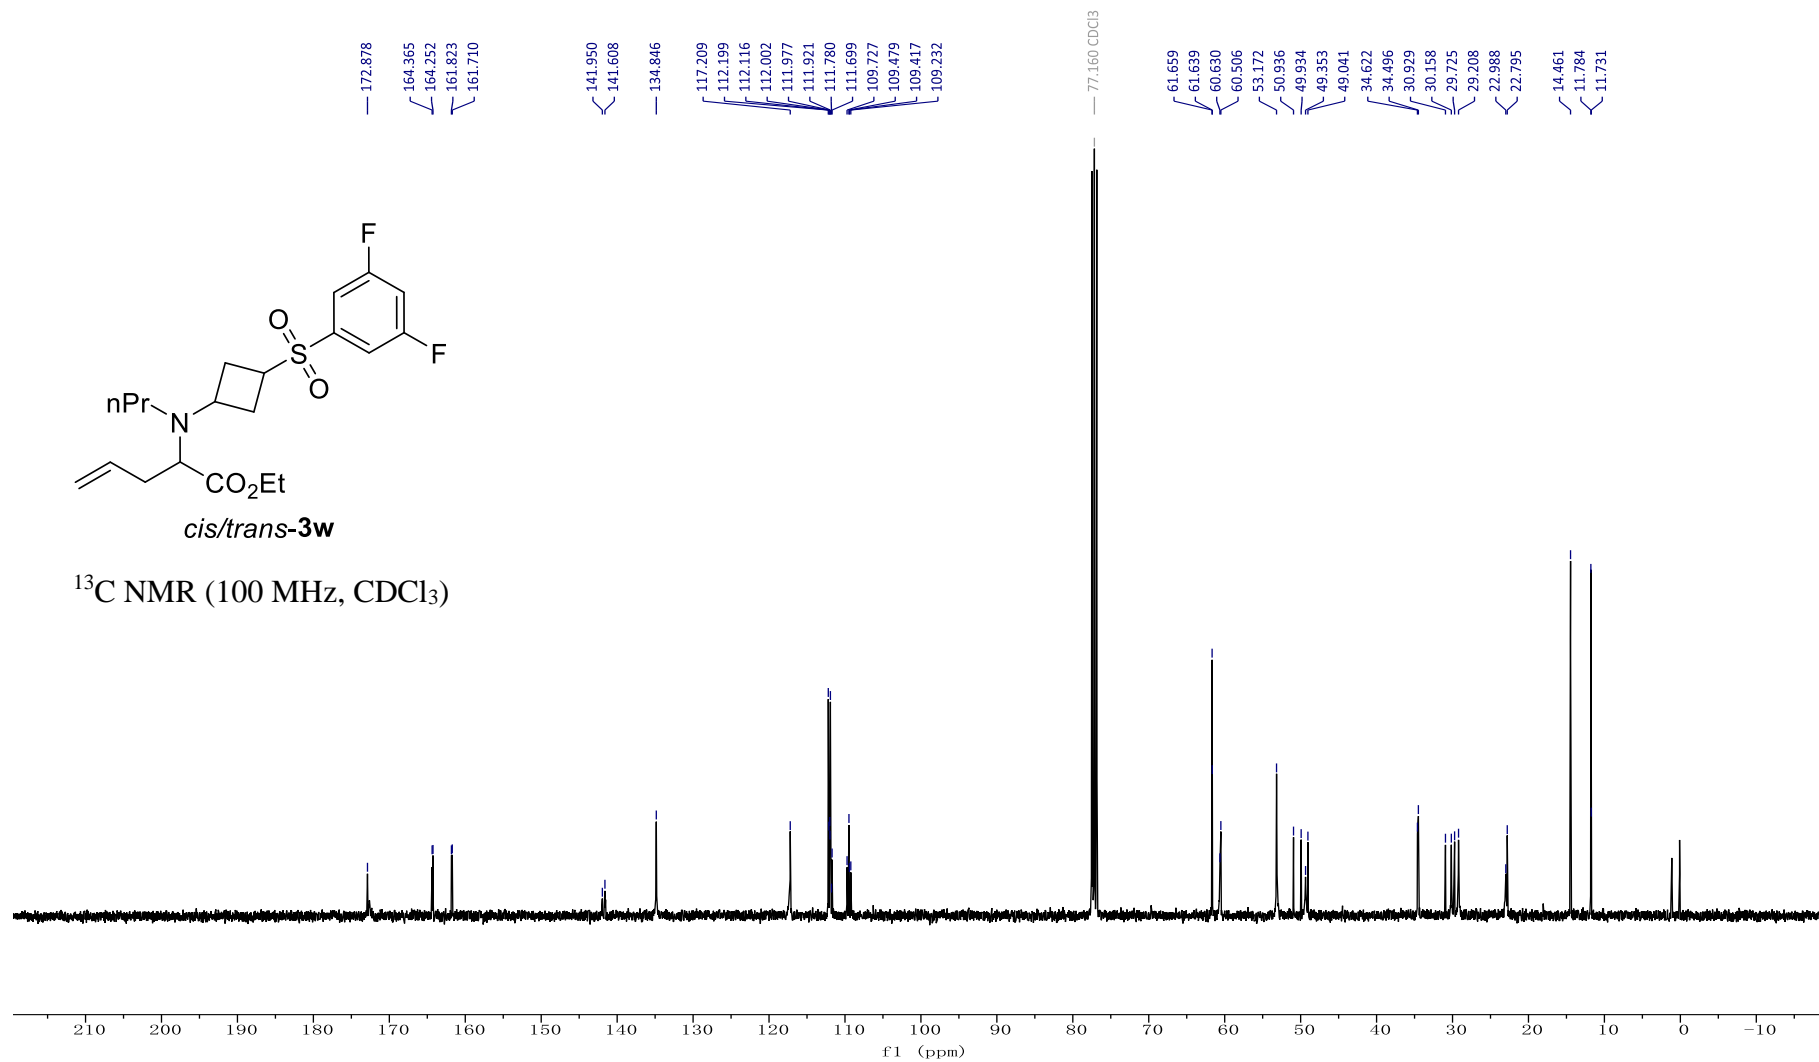

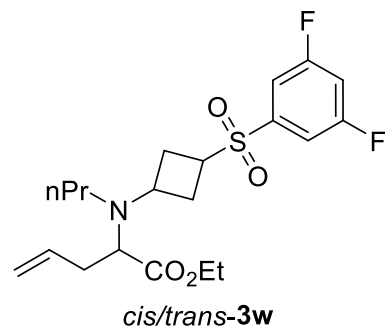

$^{19}\text{F}$  NMR (376 MHz,  $\text{CDCl}_3$ )

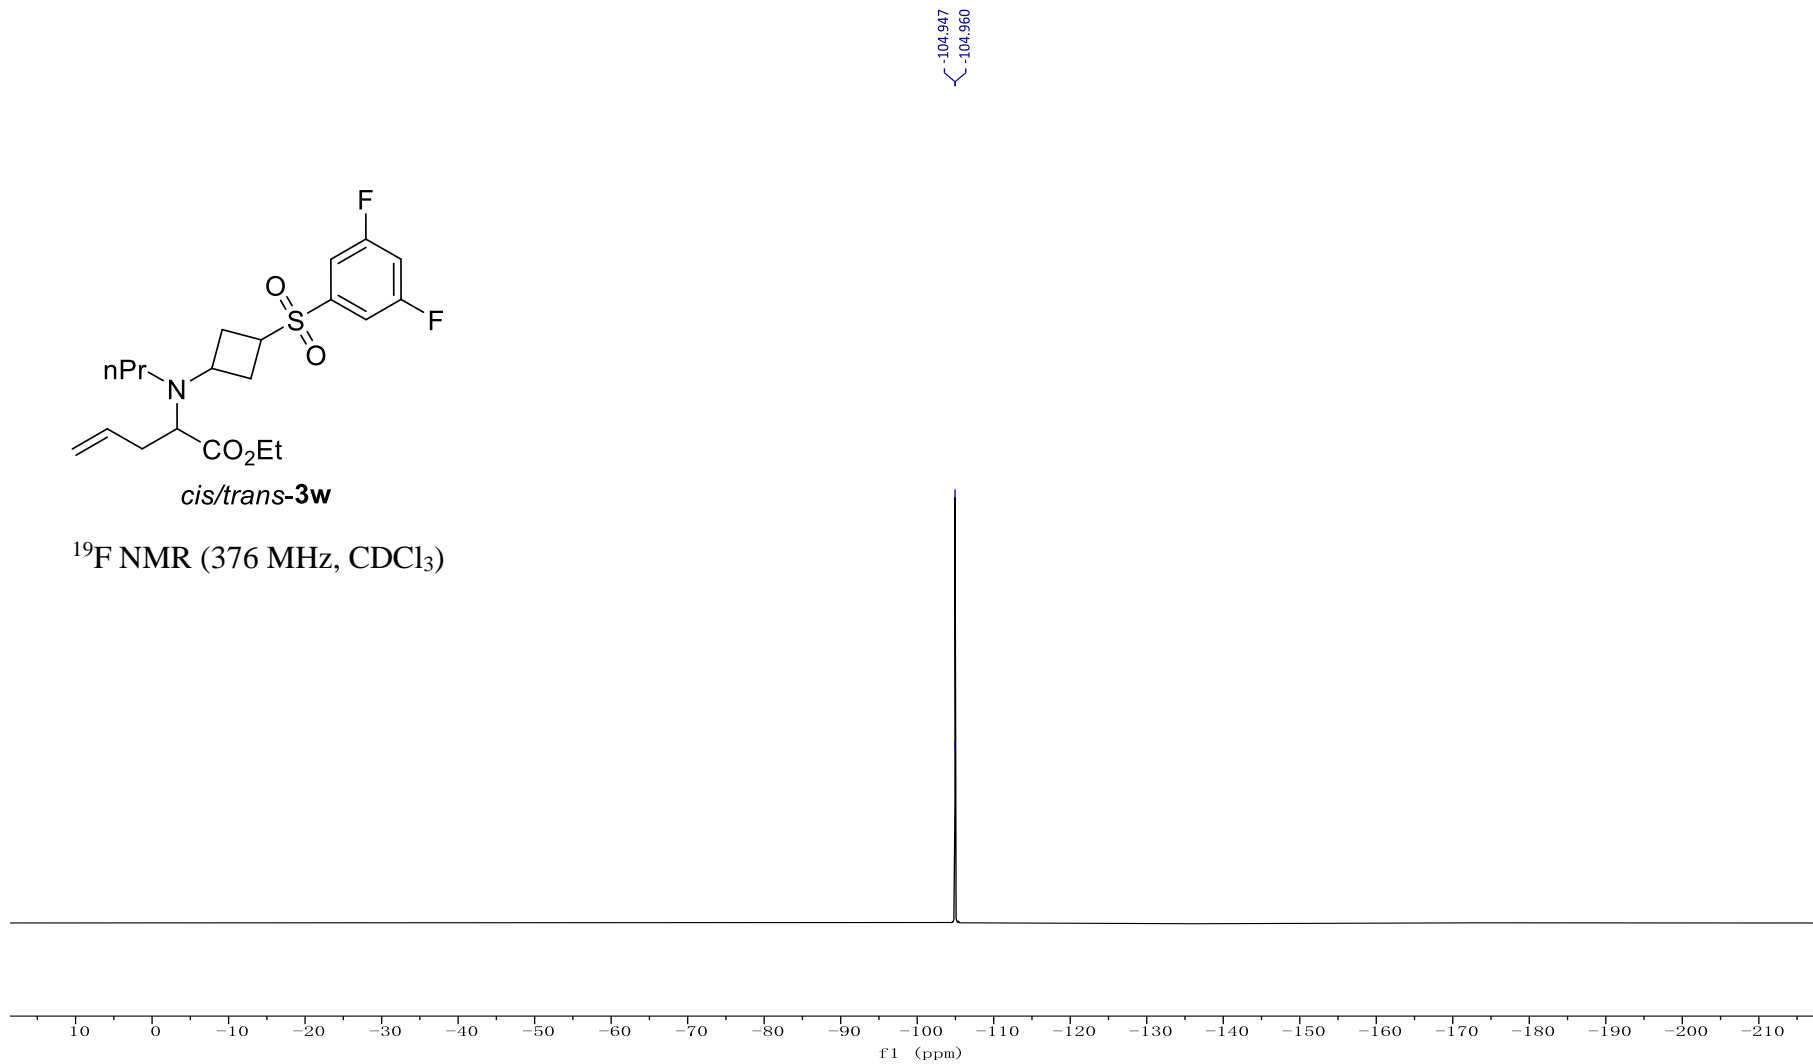

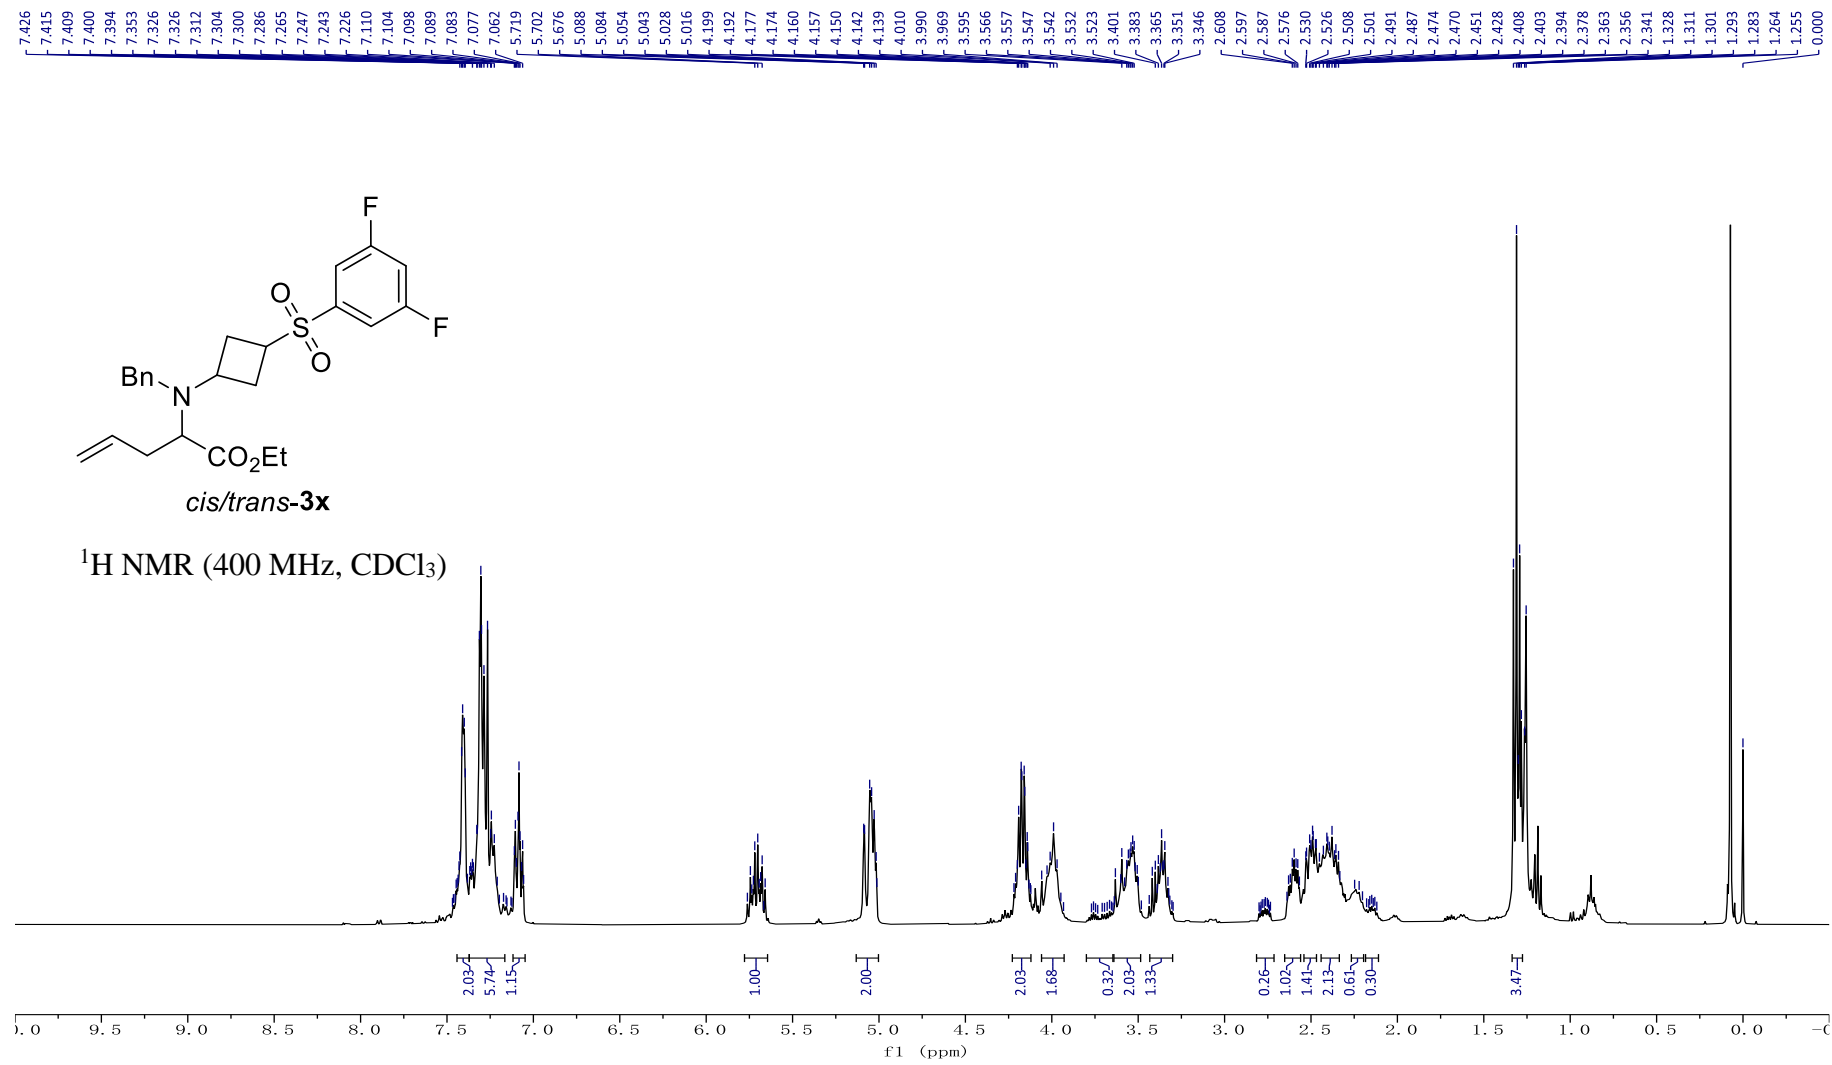

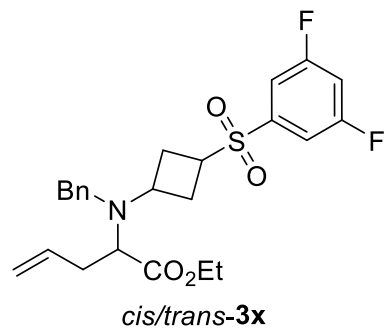

$^{13}\text{C}$  NMR (100 MHz,  $\text{CDCl}_3$ )

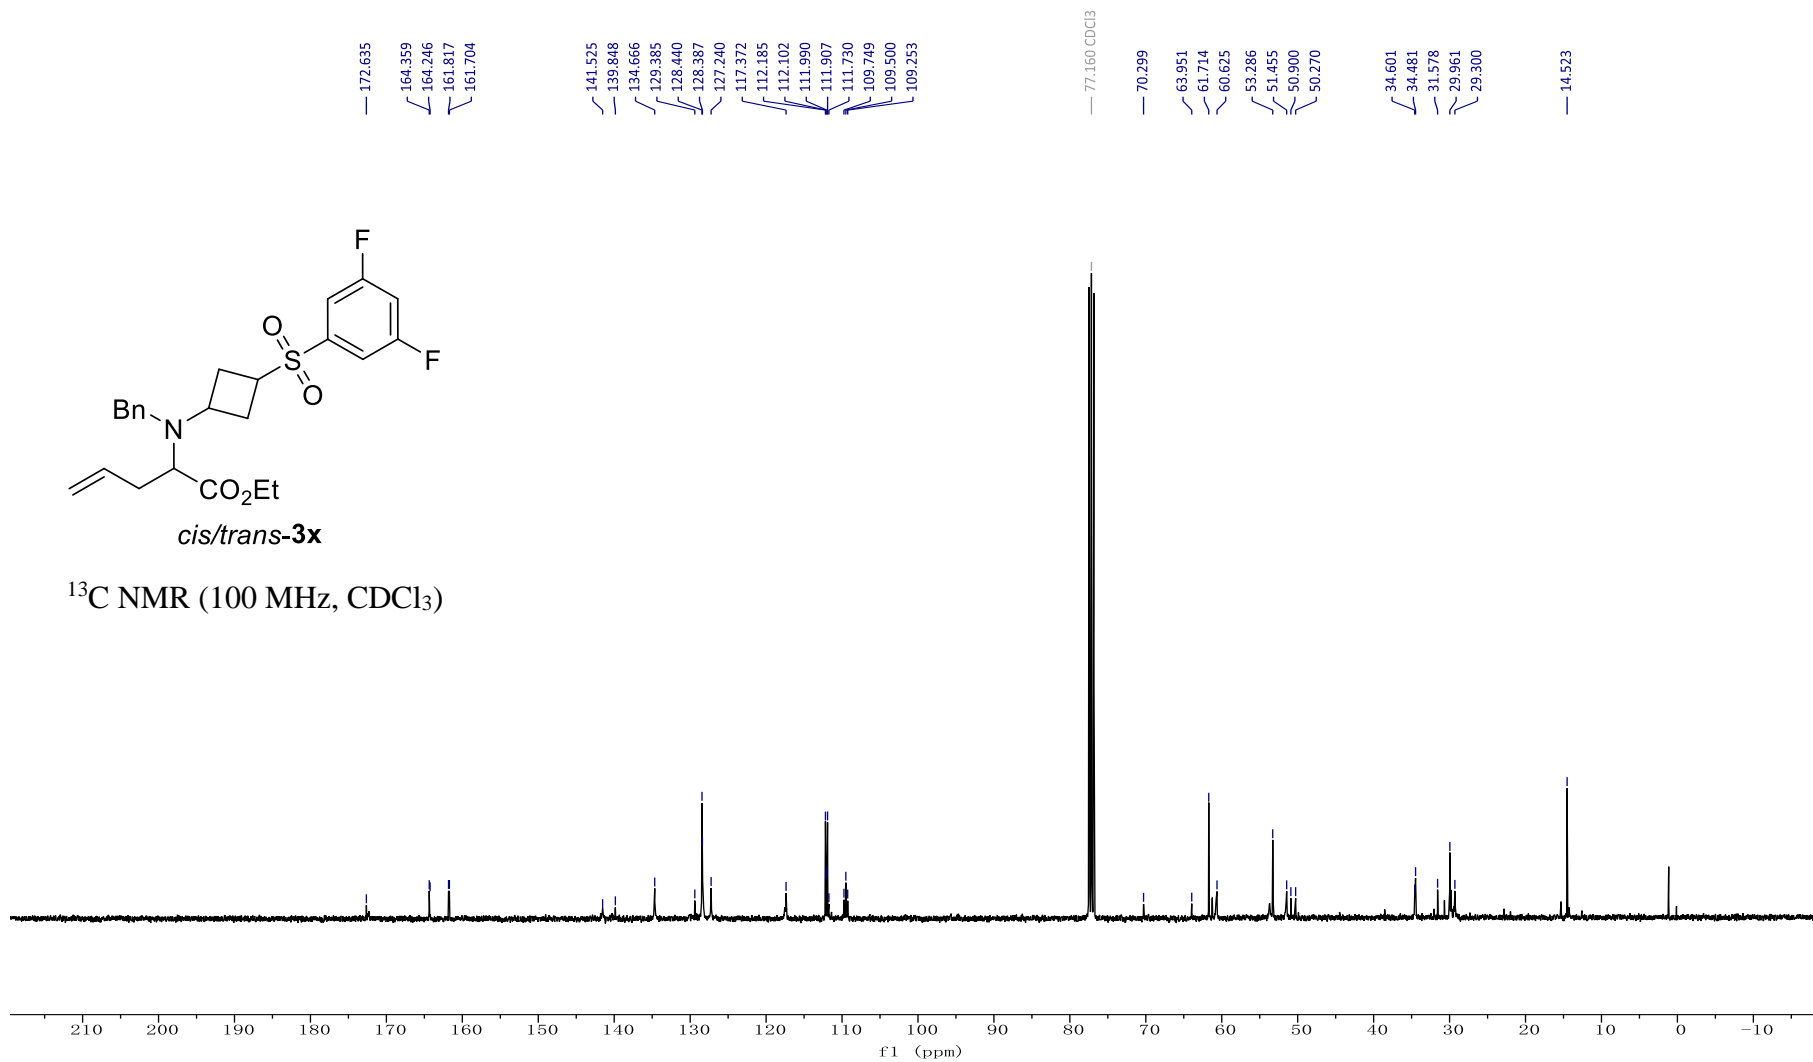

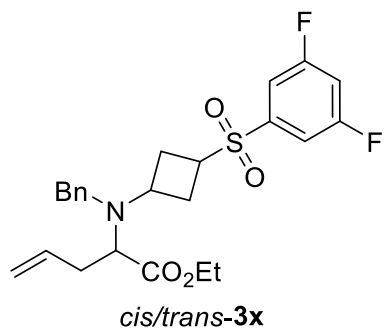

$^{19}\text{F}$  NMR (376 MHz,  $\text{CDCl}_3$ )

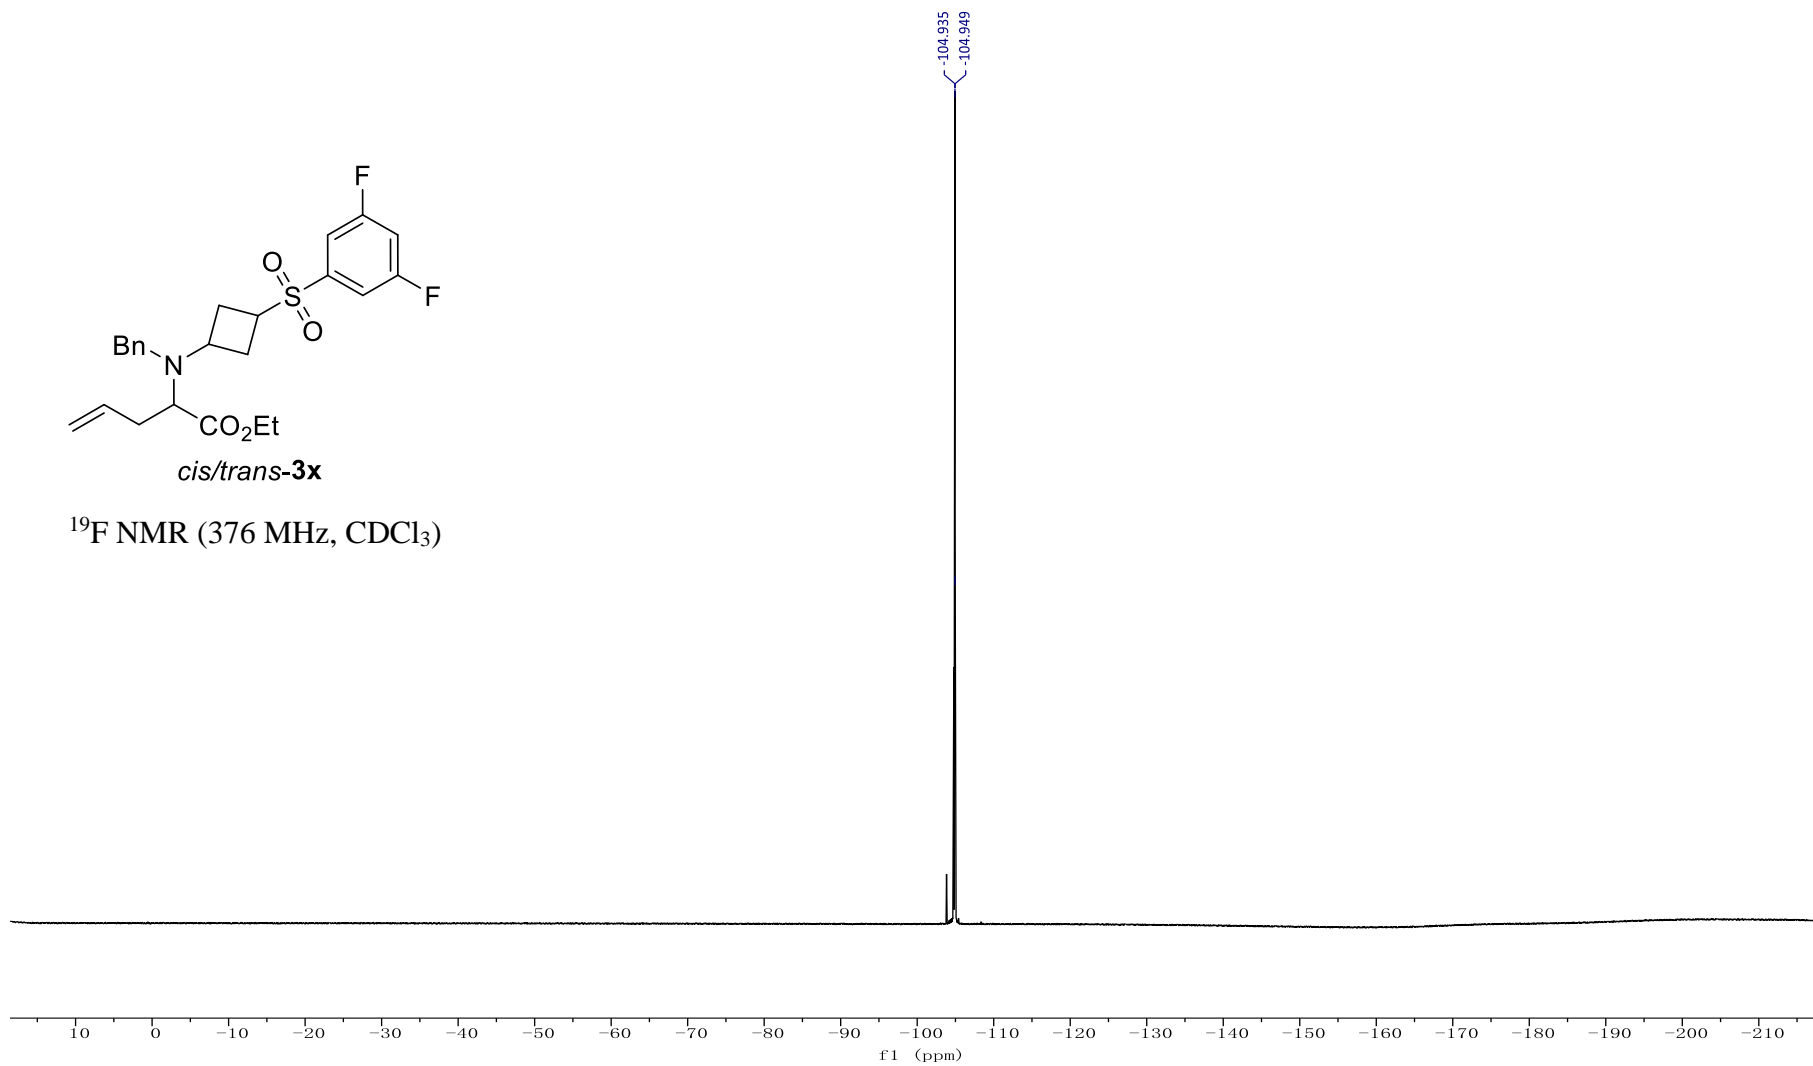



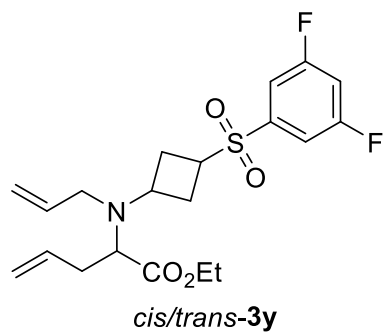

<sup>1</sup>H NMR (400 MHz, CDCl<sub>3</sub>)

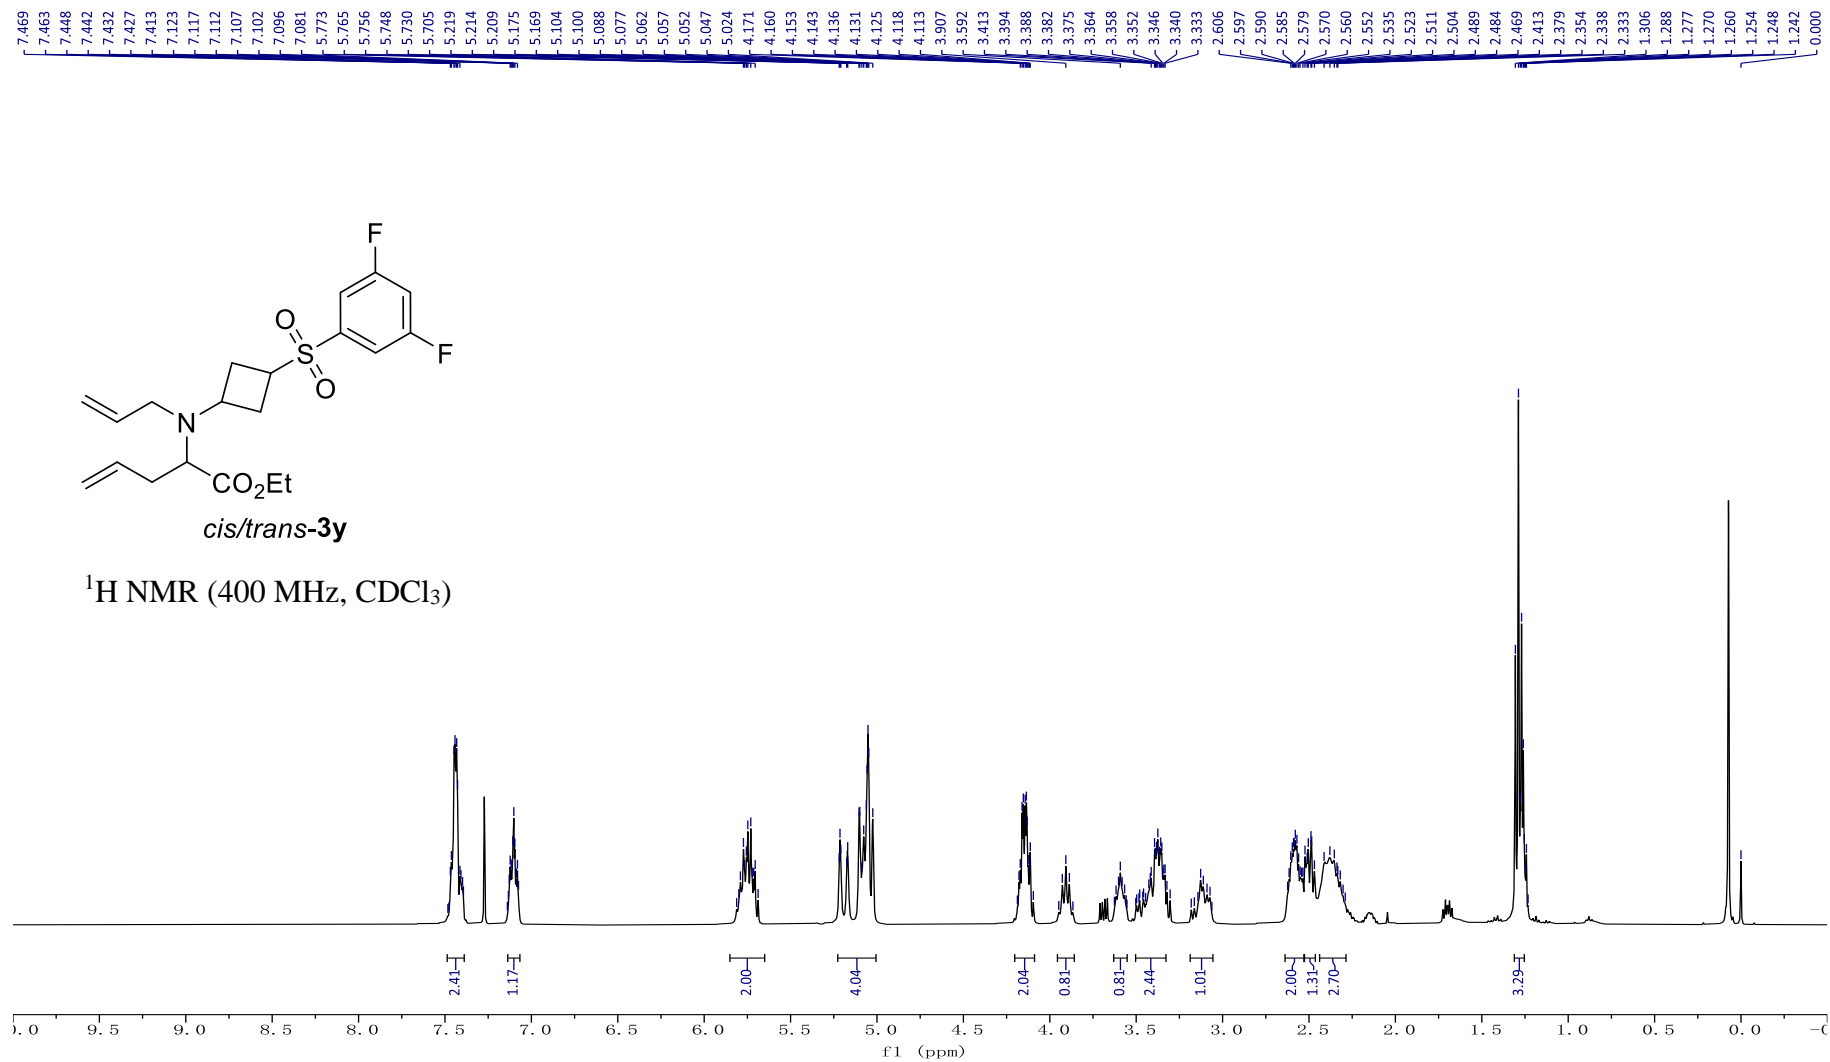

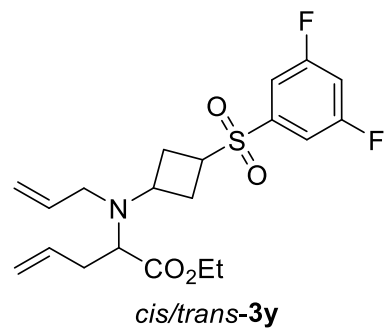

$^{13}\text{C}$  NMR (100 MHz,  $\text{CDCl}_3$ )

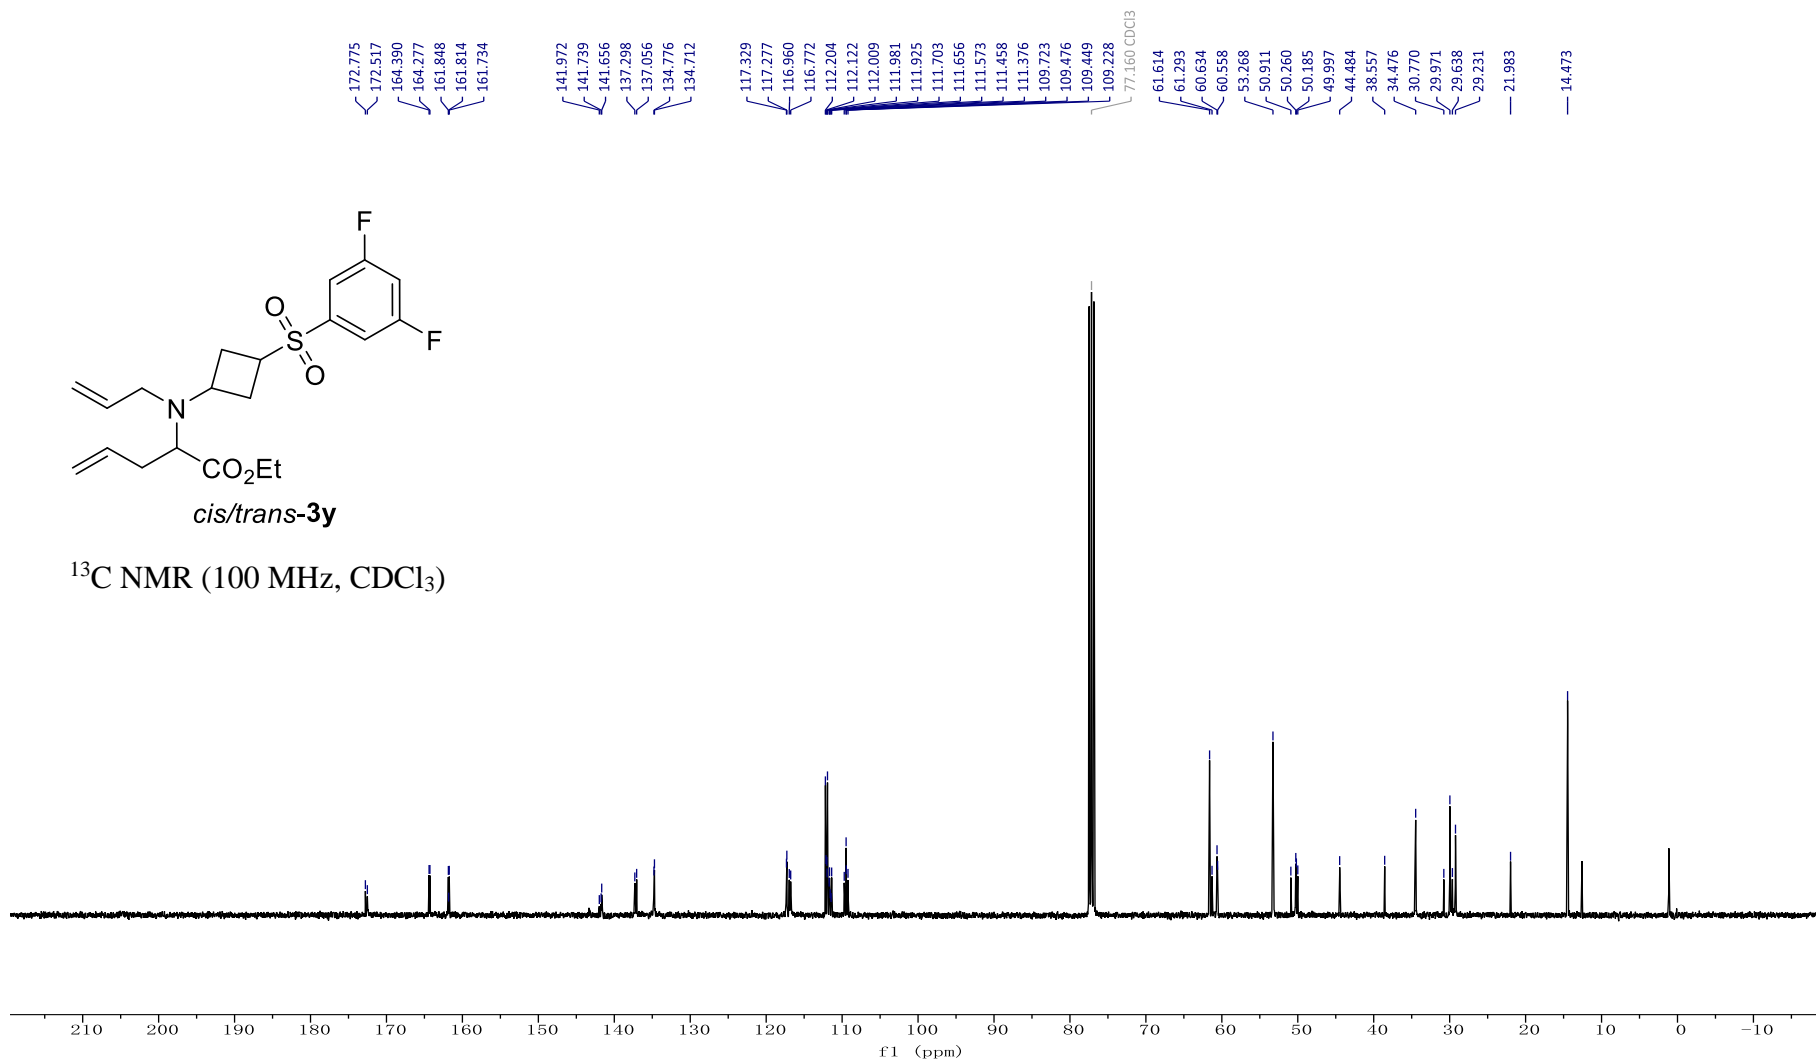

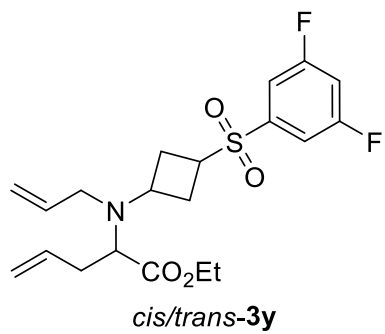

$^{19}\text{F}$  NMR (376 MHz,  $\text{CDCl}_3$ )

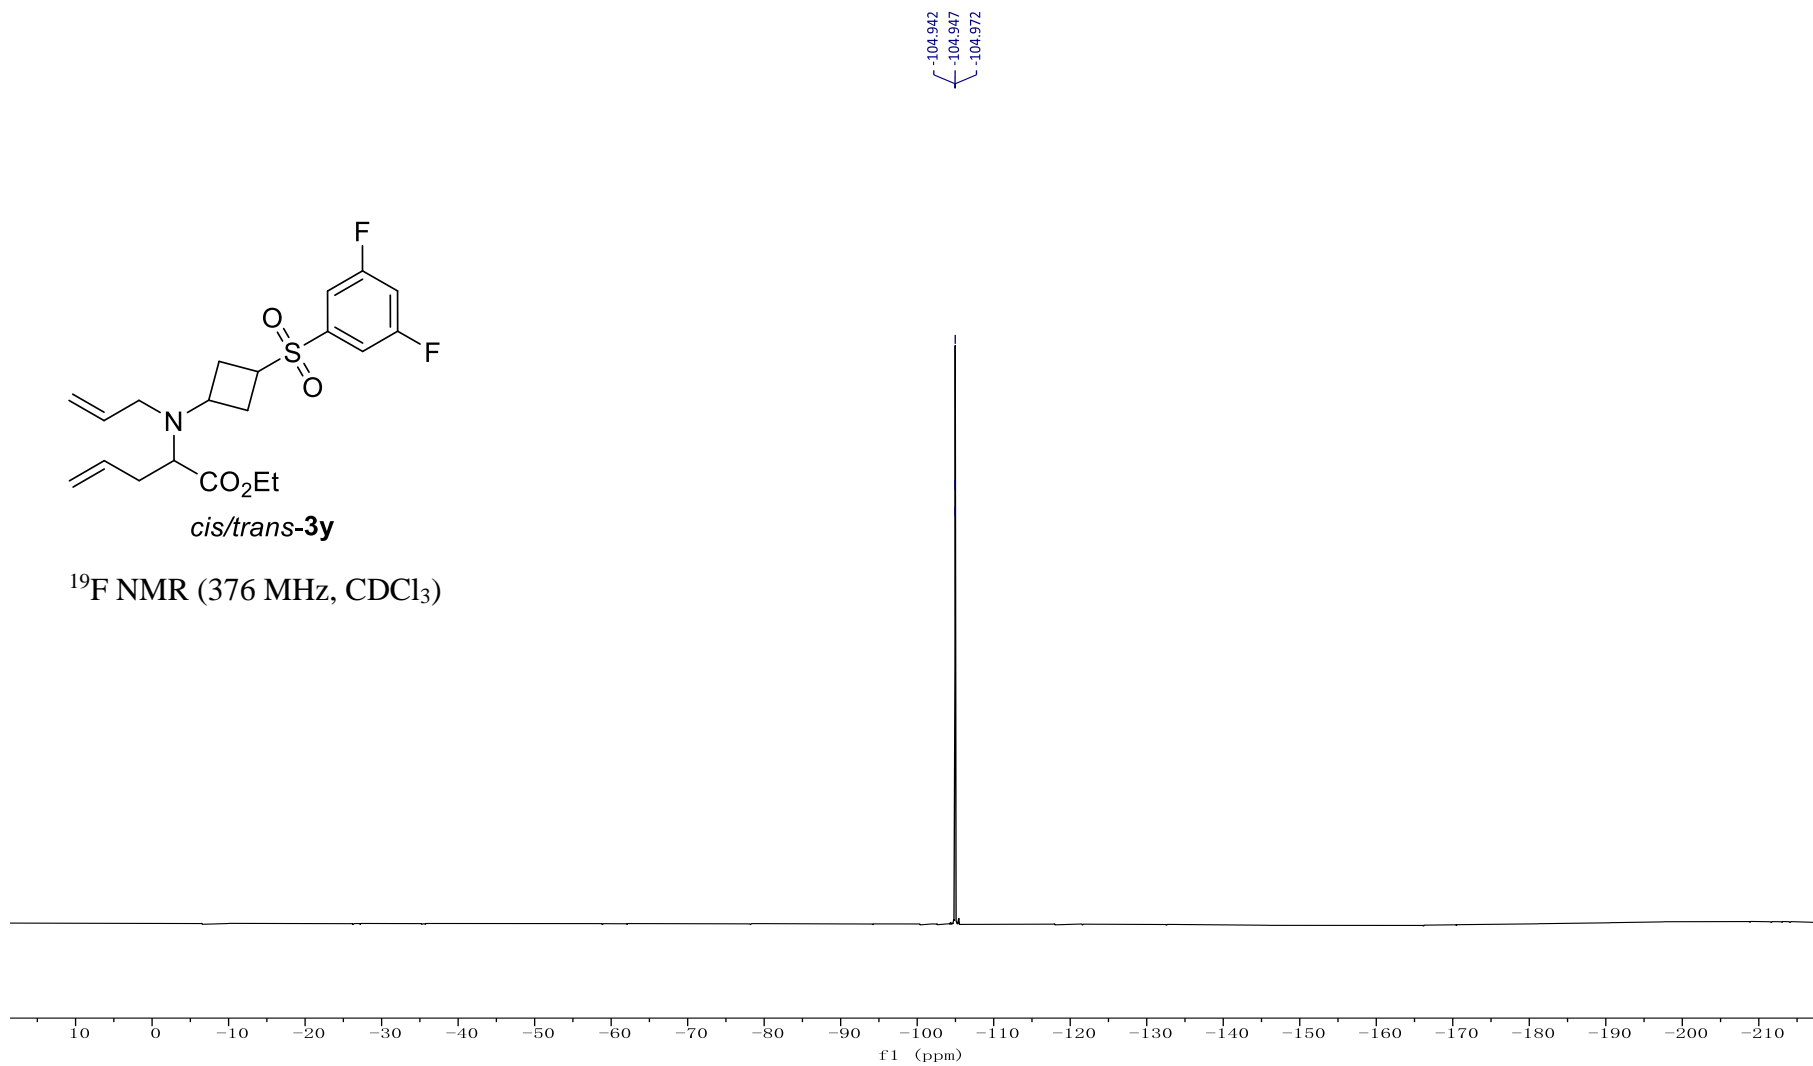

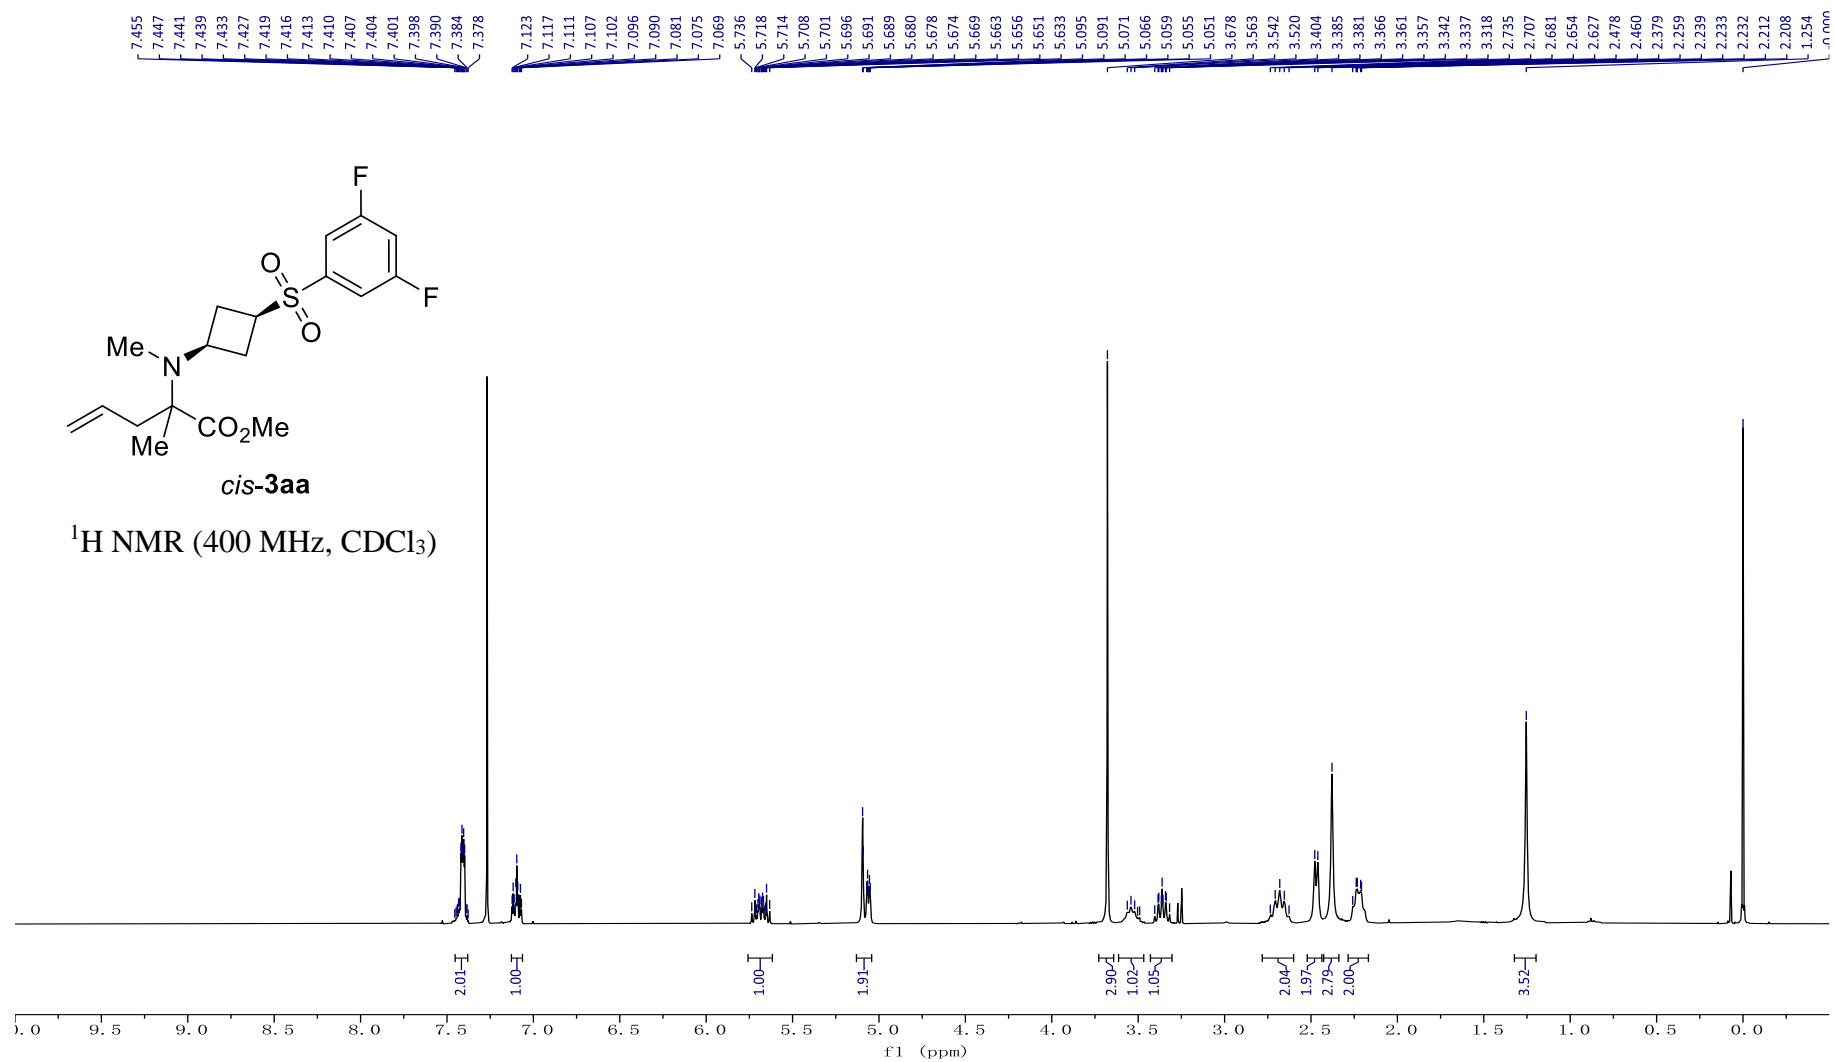

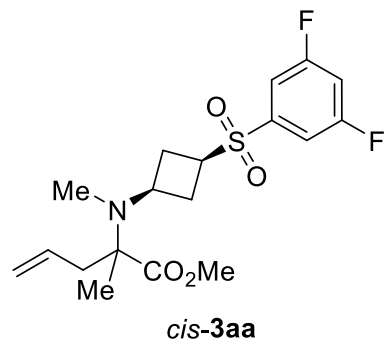

<sup>13</sup>C NMR (100 MHz, CDCl<sub>3</sub>)

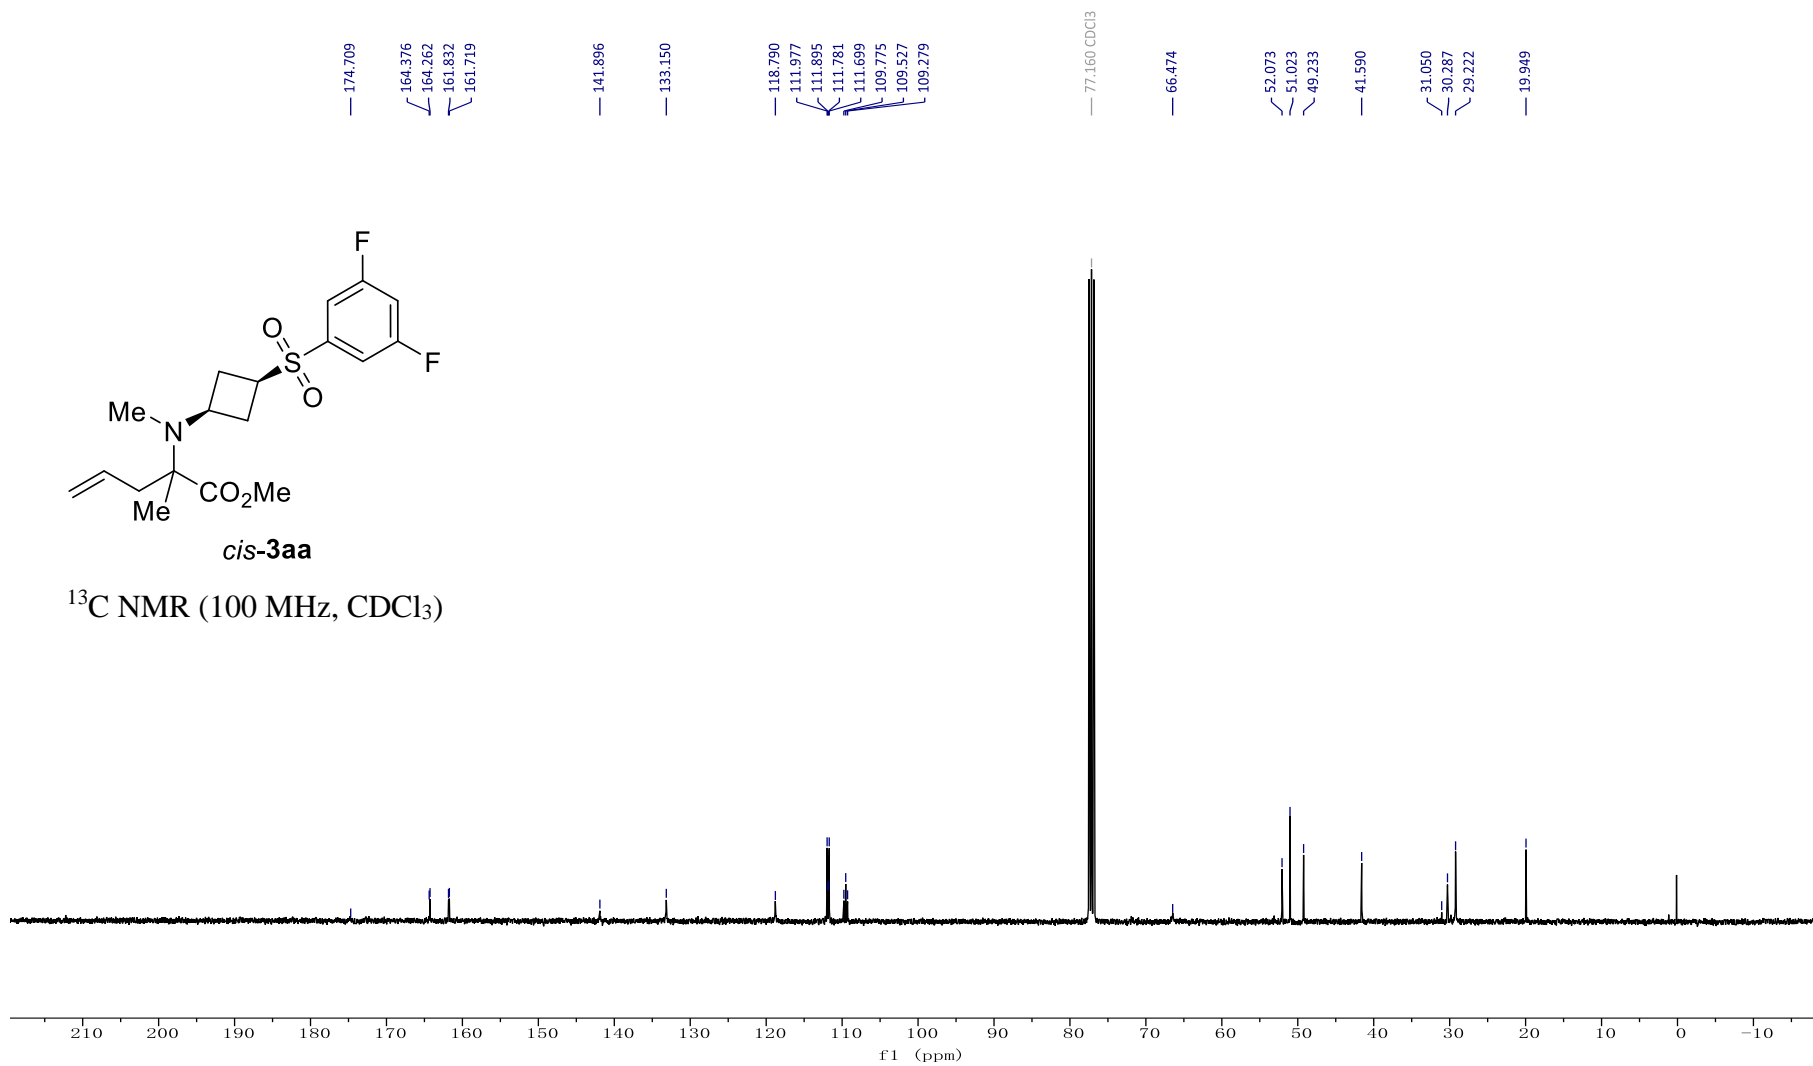

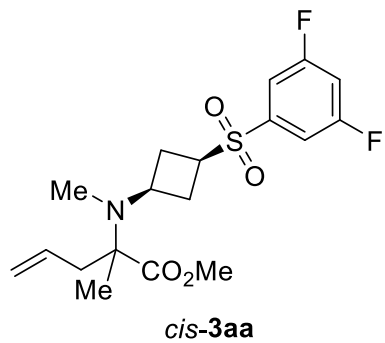

$^{19}\text{F}$  NMR (376 MHz,  $\text{CDCl}_3$ )

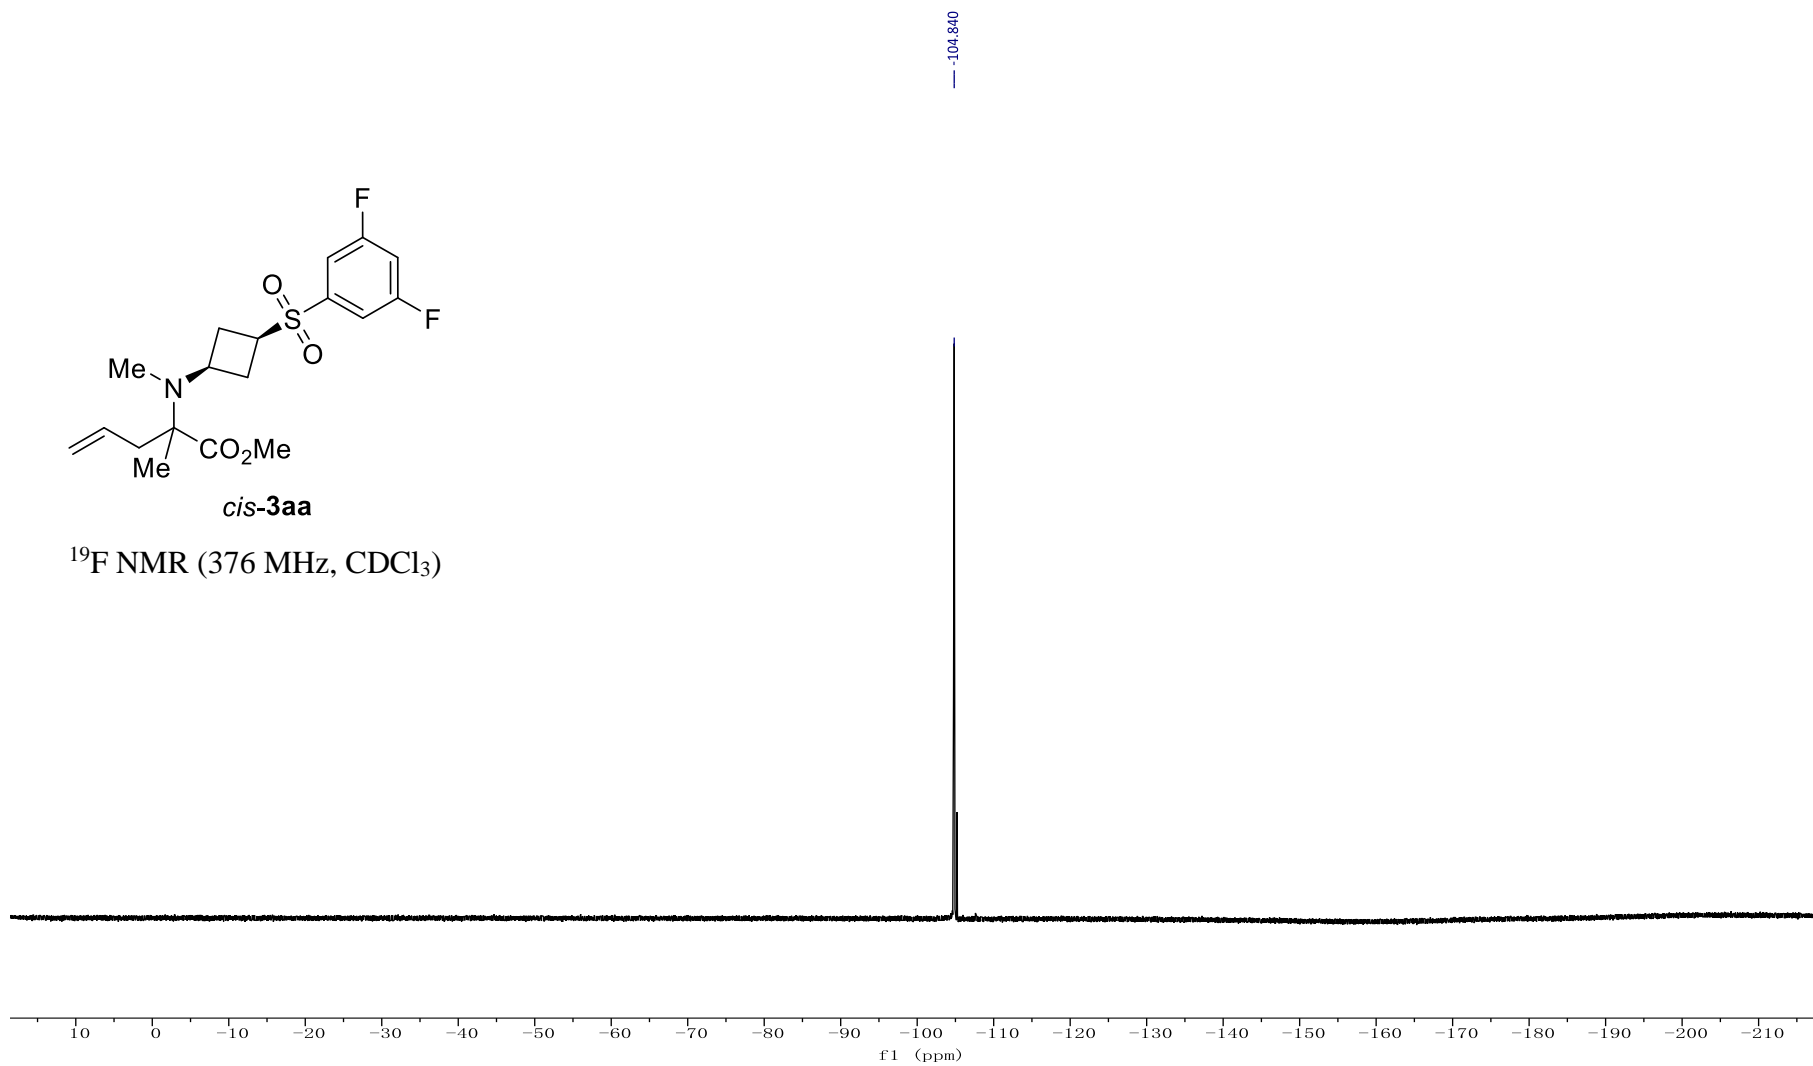

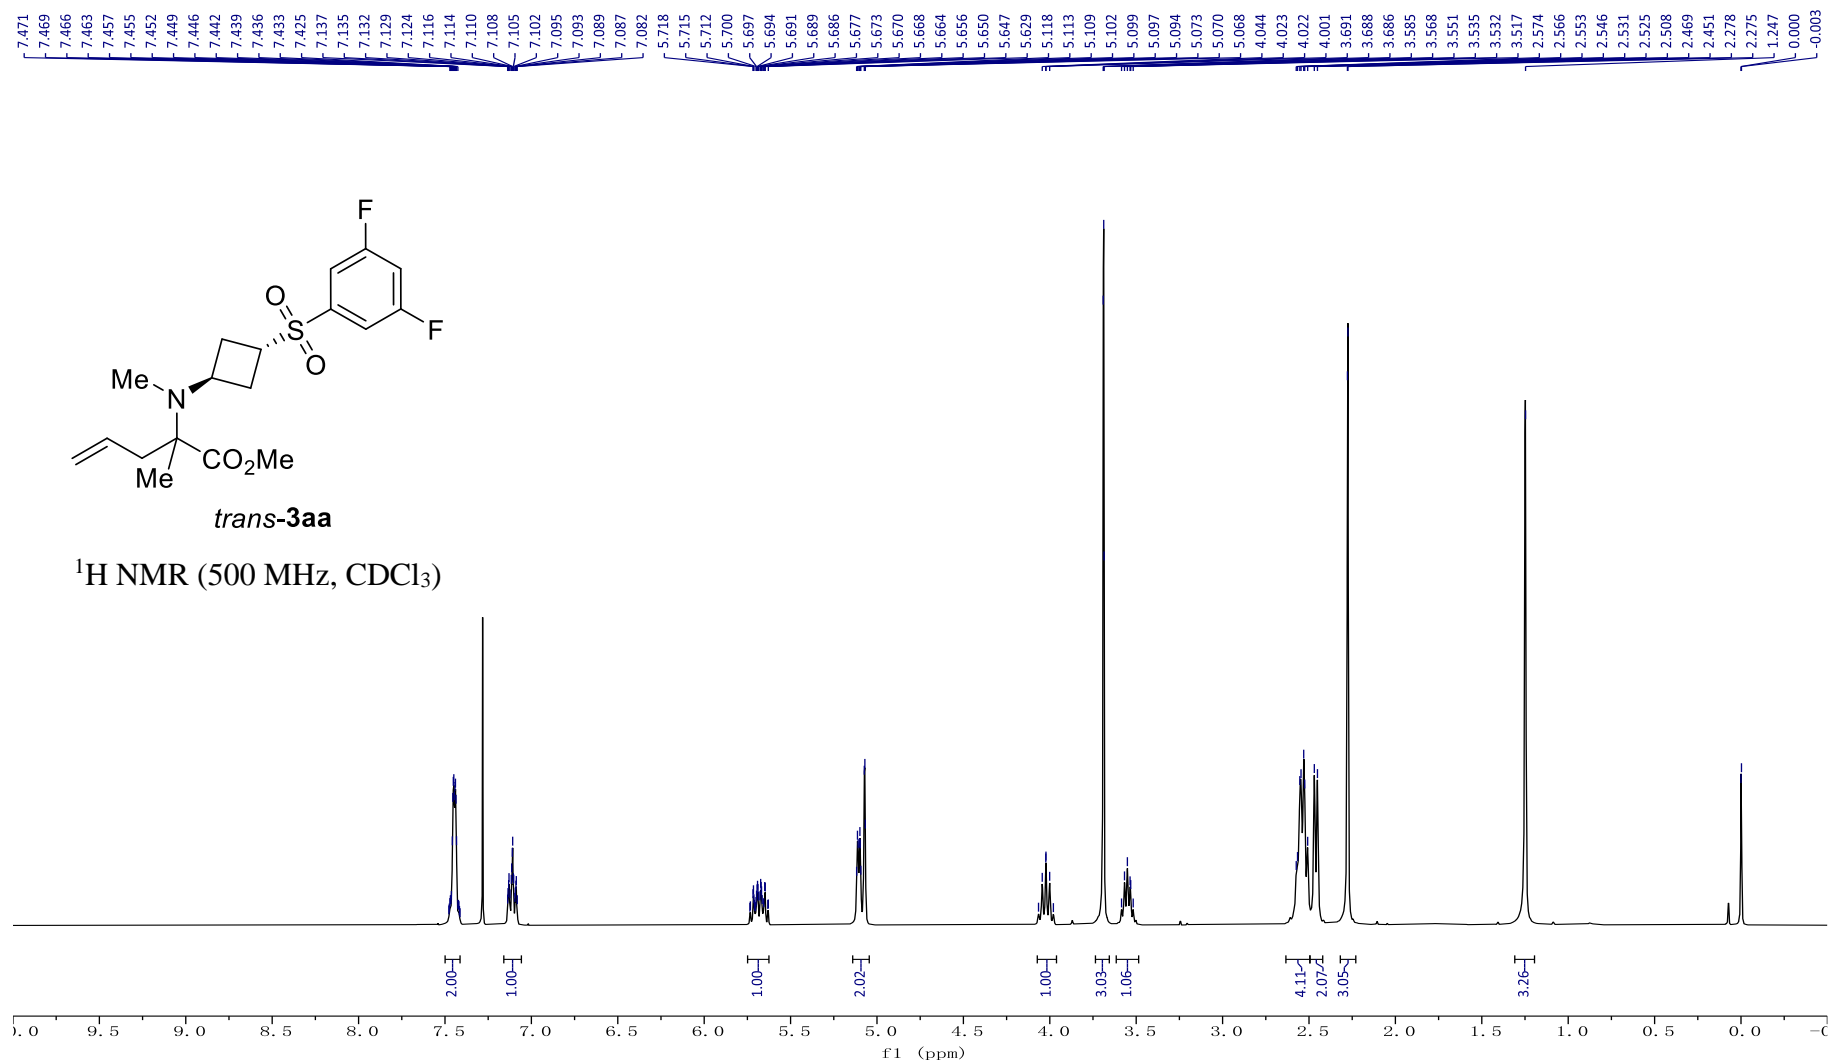

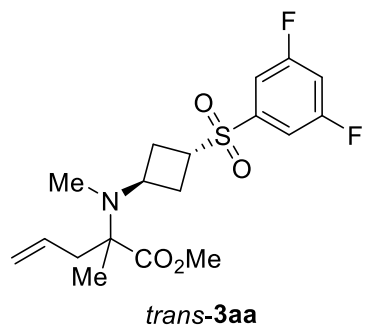

<sup>13</sup>C NMR (125 MHz, CDCl<sub>3</sub>)

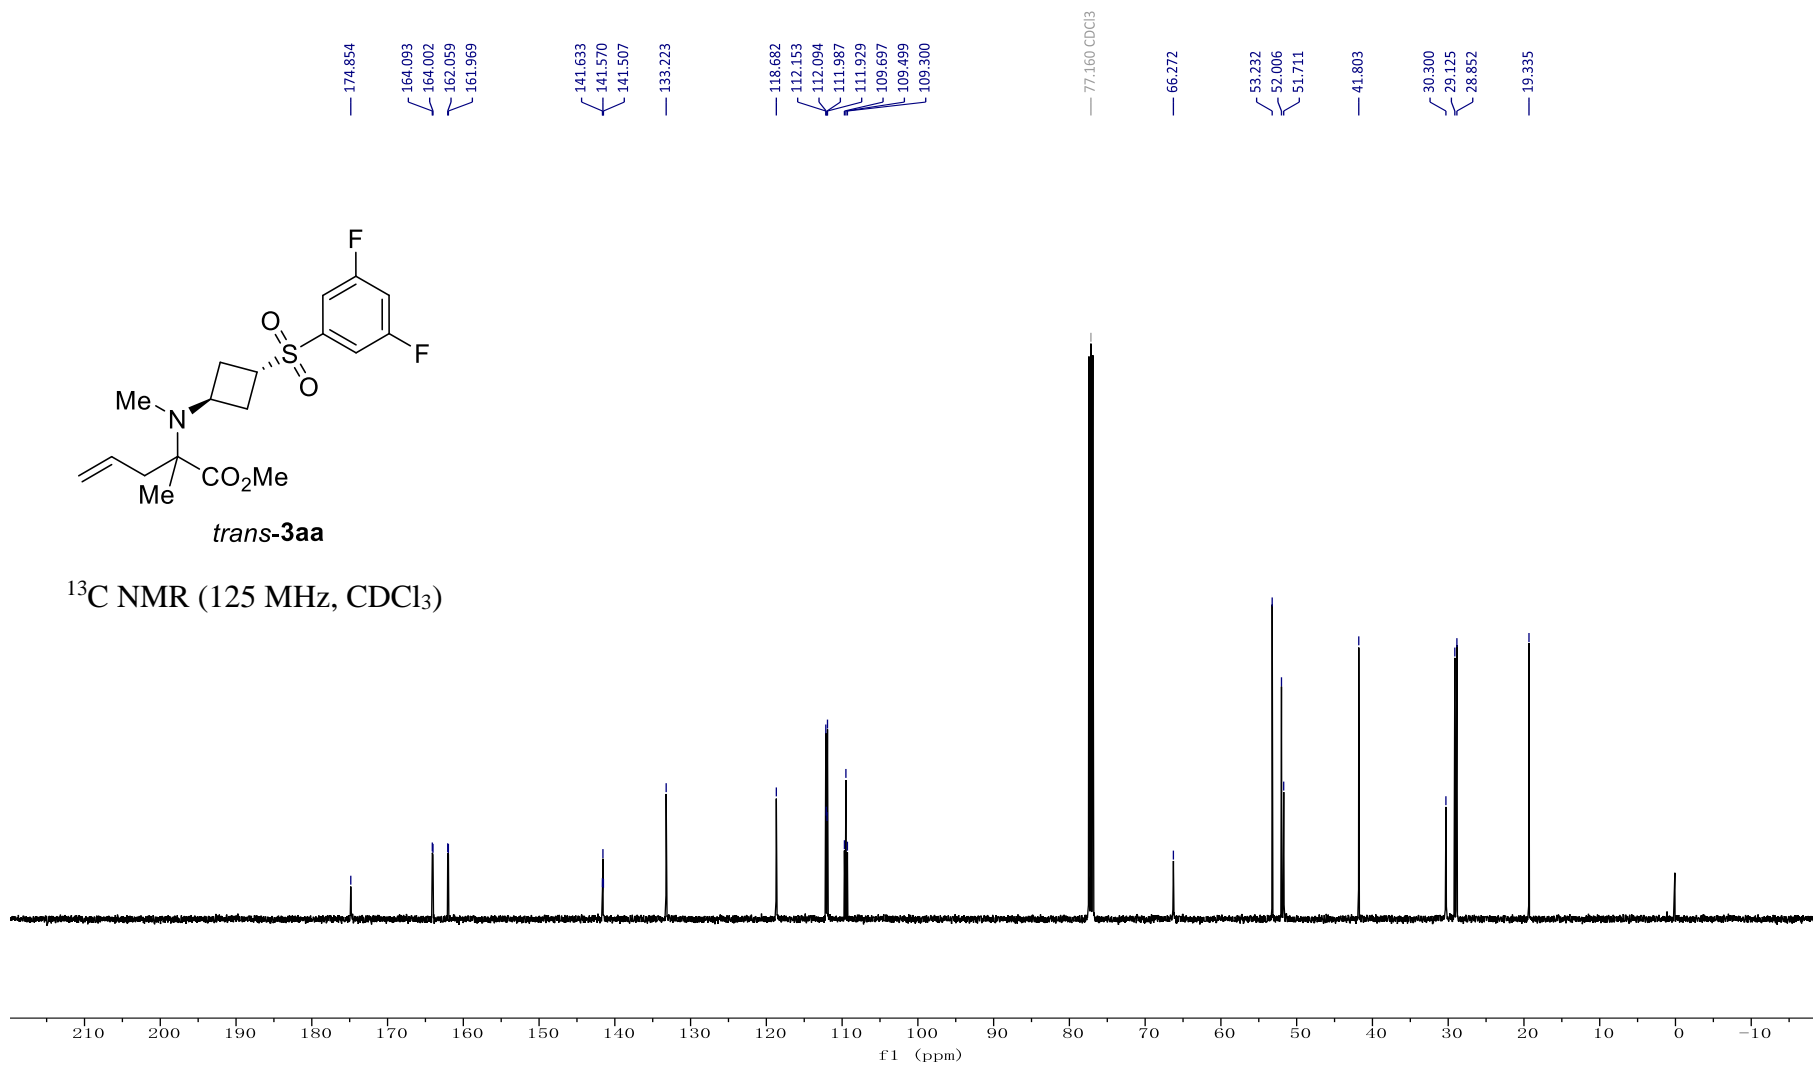



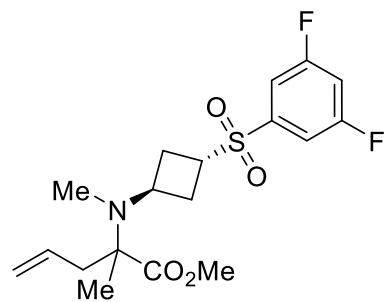

*trans*-3aa

<sup>19</sup>F NMR (471 MHz, CDCl<sub>3</sub>)

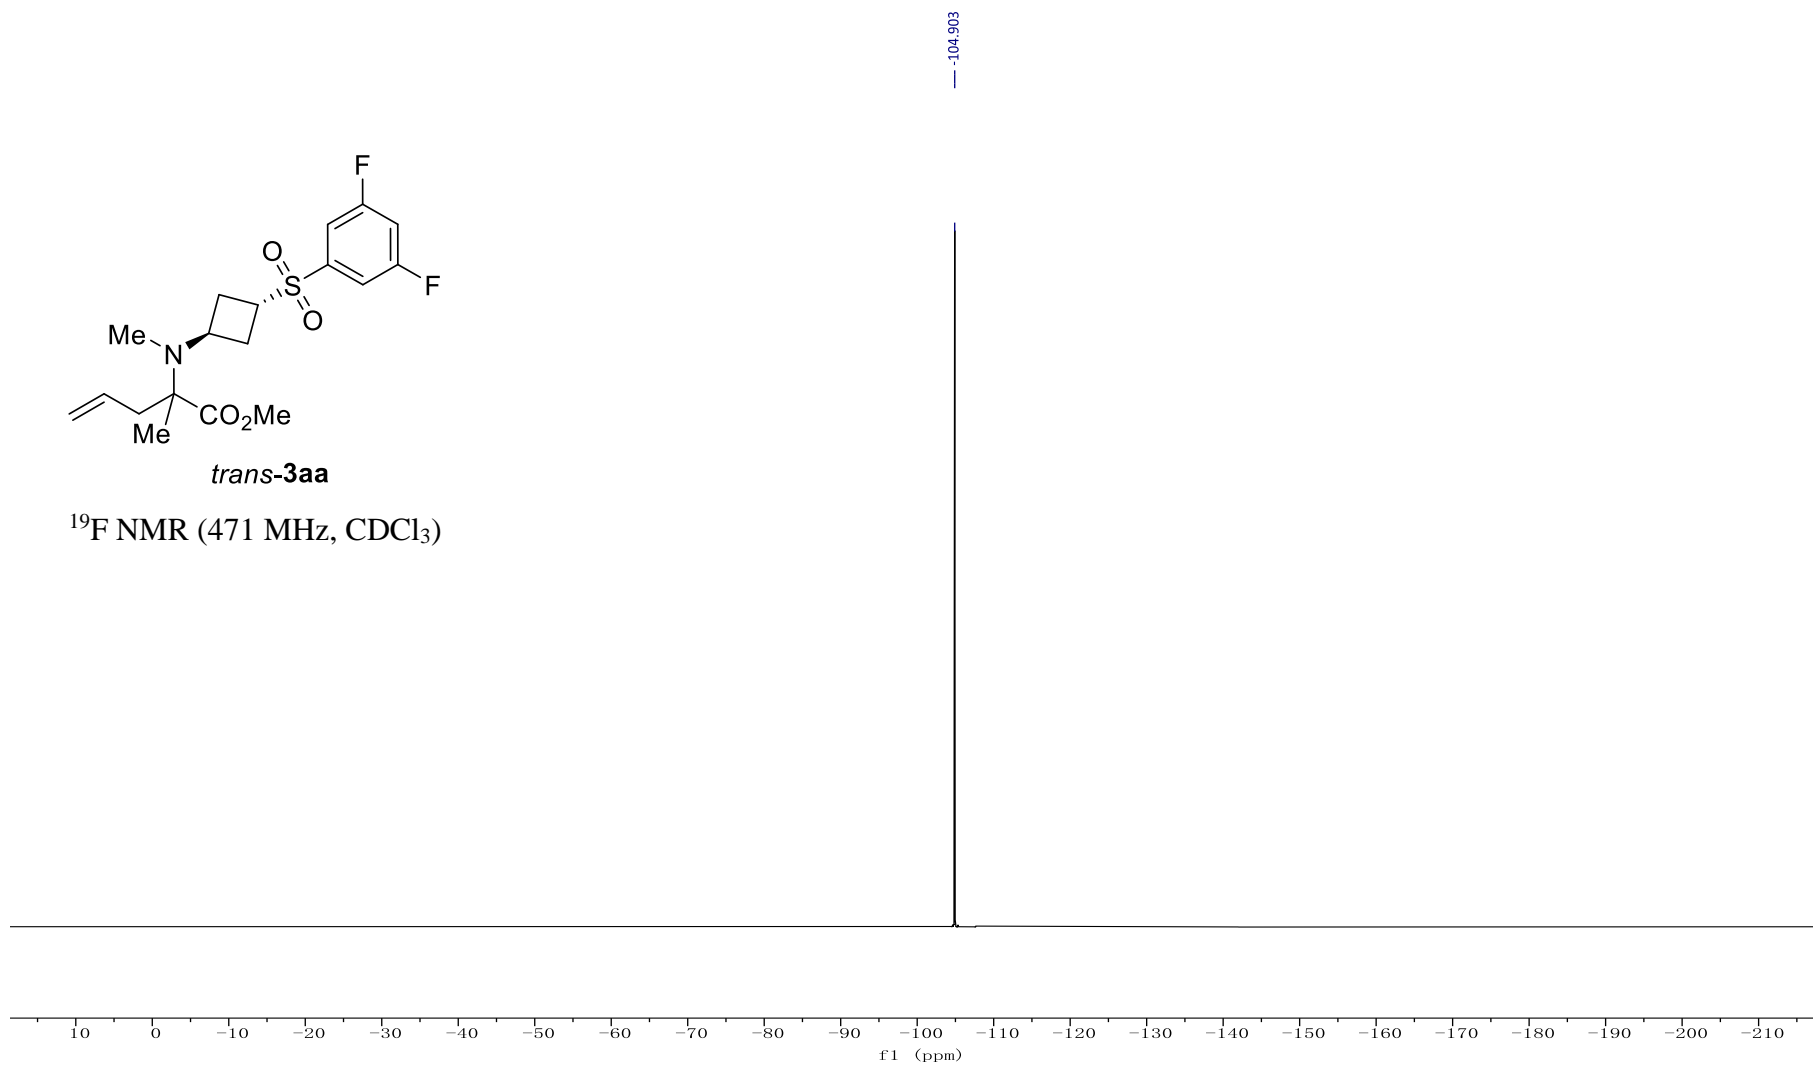

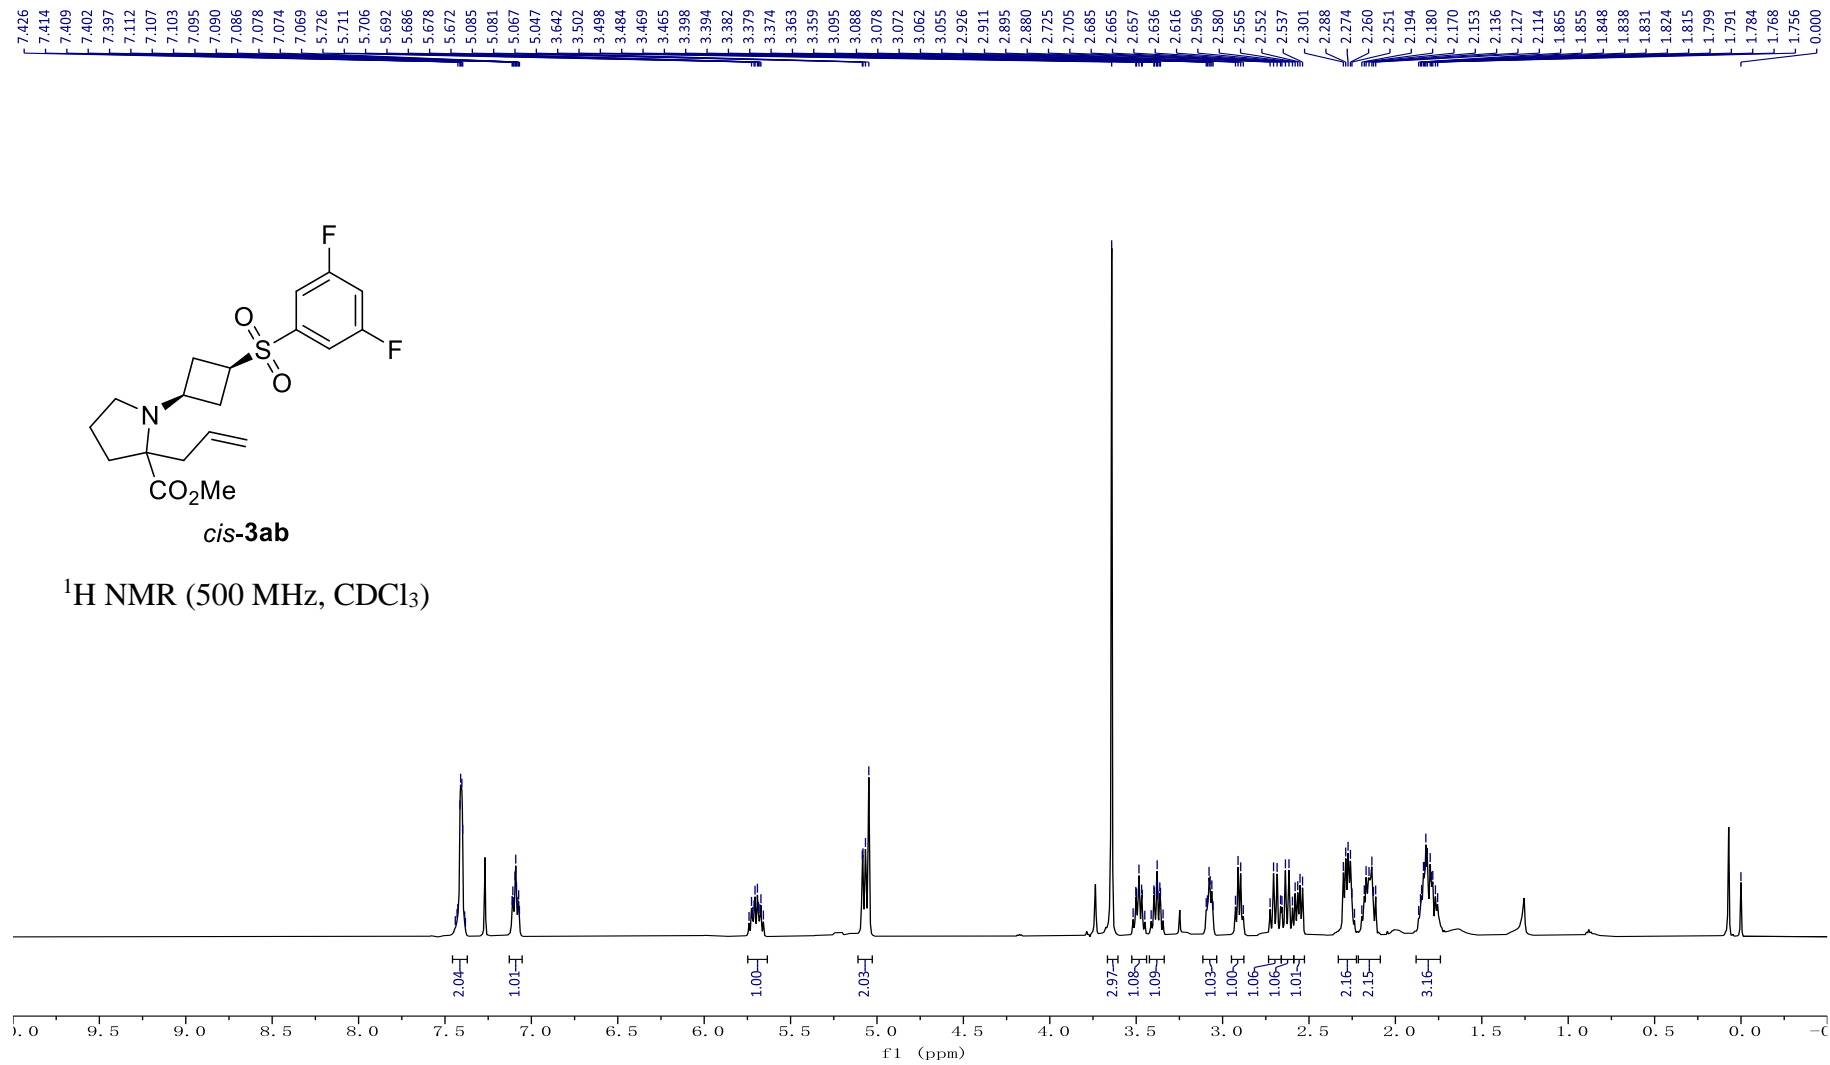

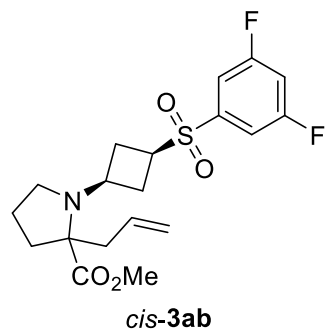

$^{13}\text{C}$  NMR (125 MHz,  $\text{CDCl}_3$ )

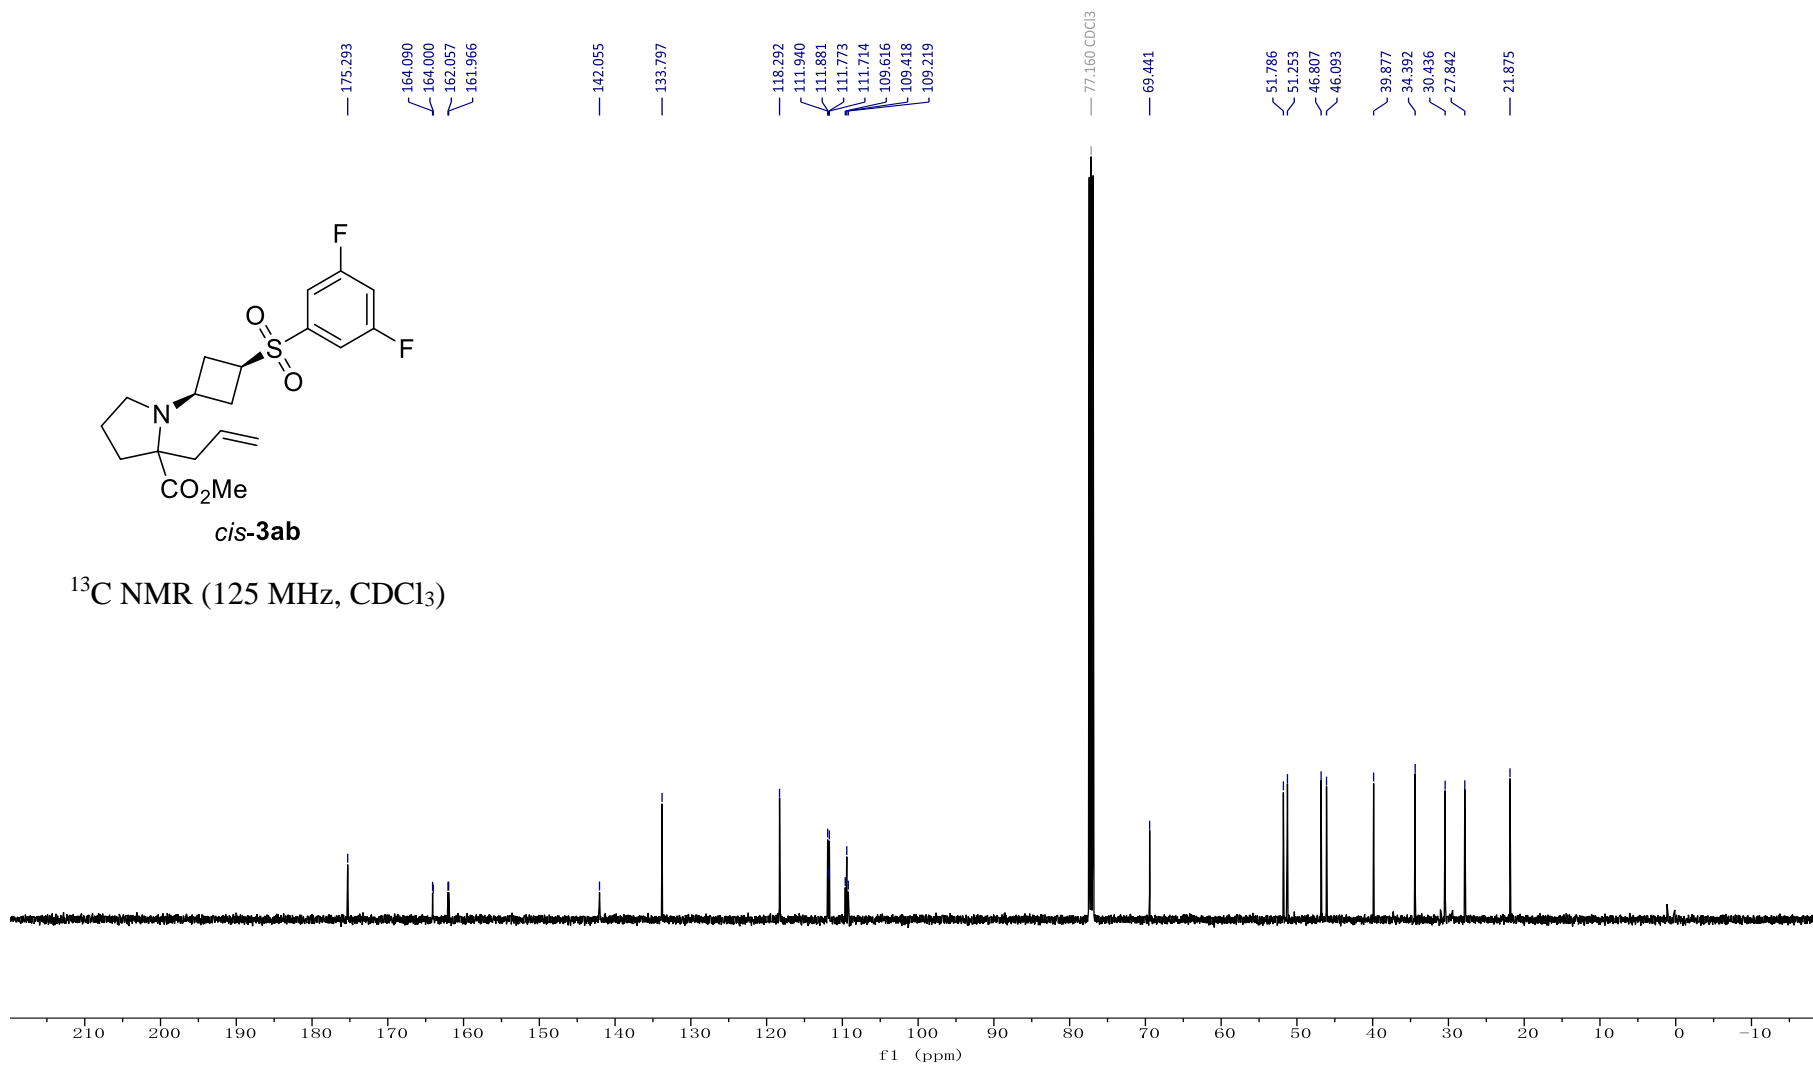

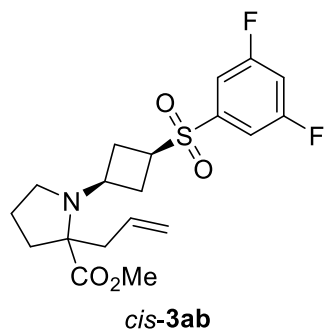

$^{19}\text{F}$  NMR (471 MHz,  $\text{CDCl}_3$ )

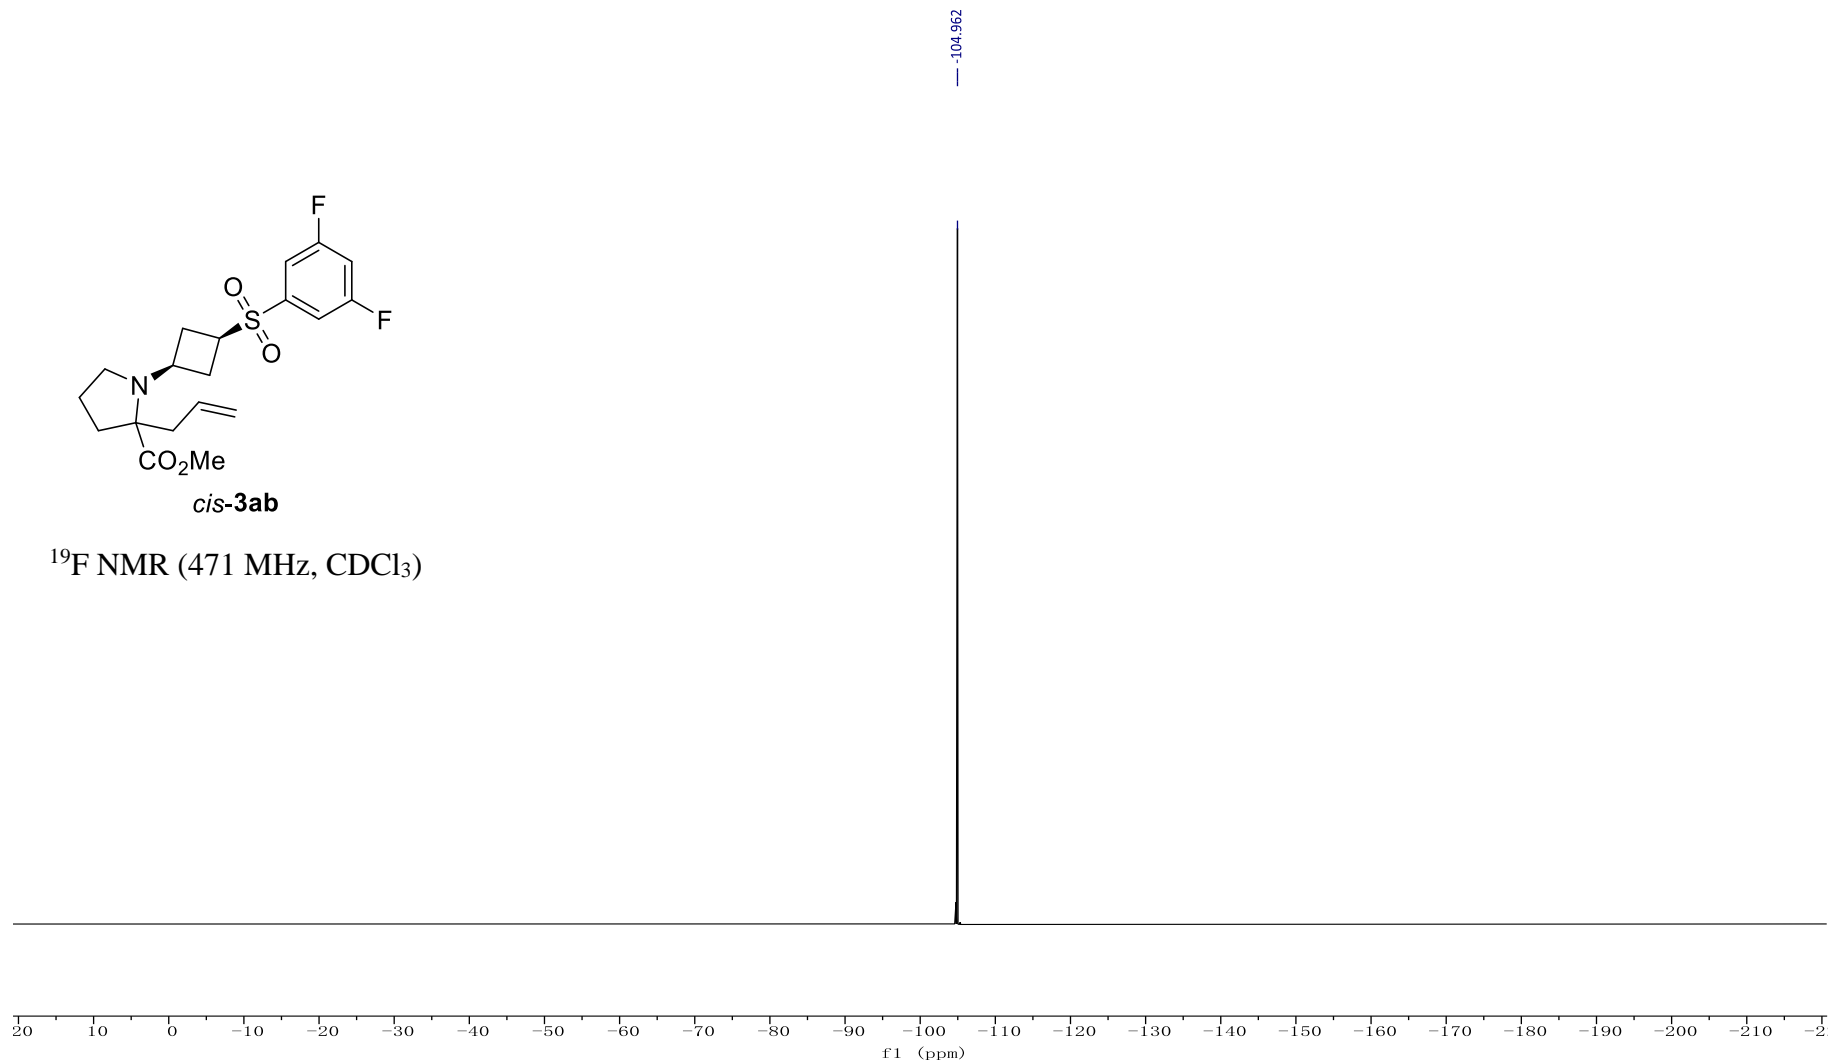

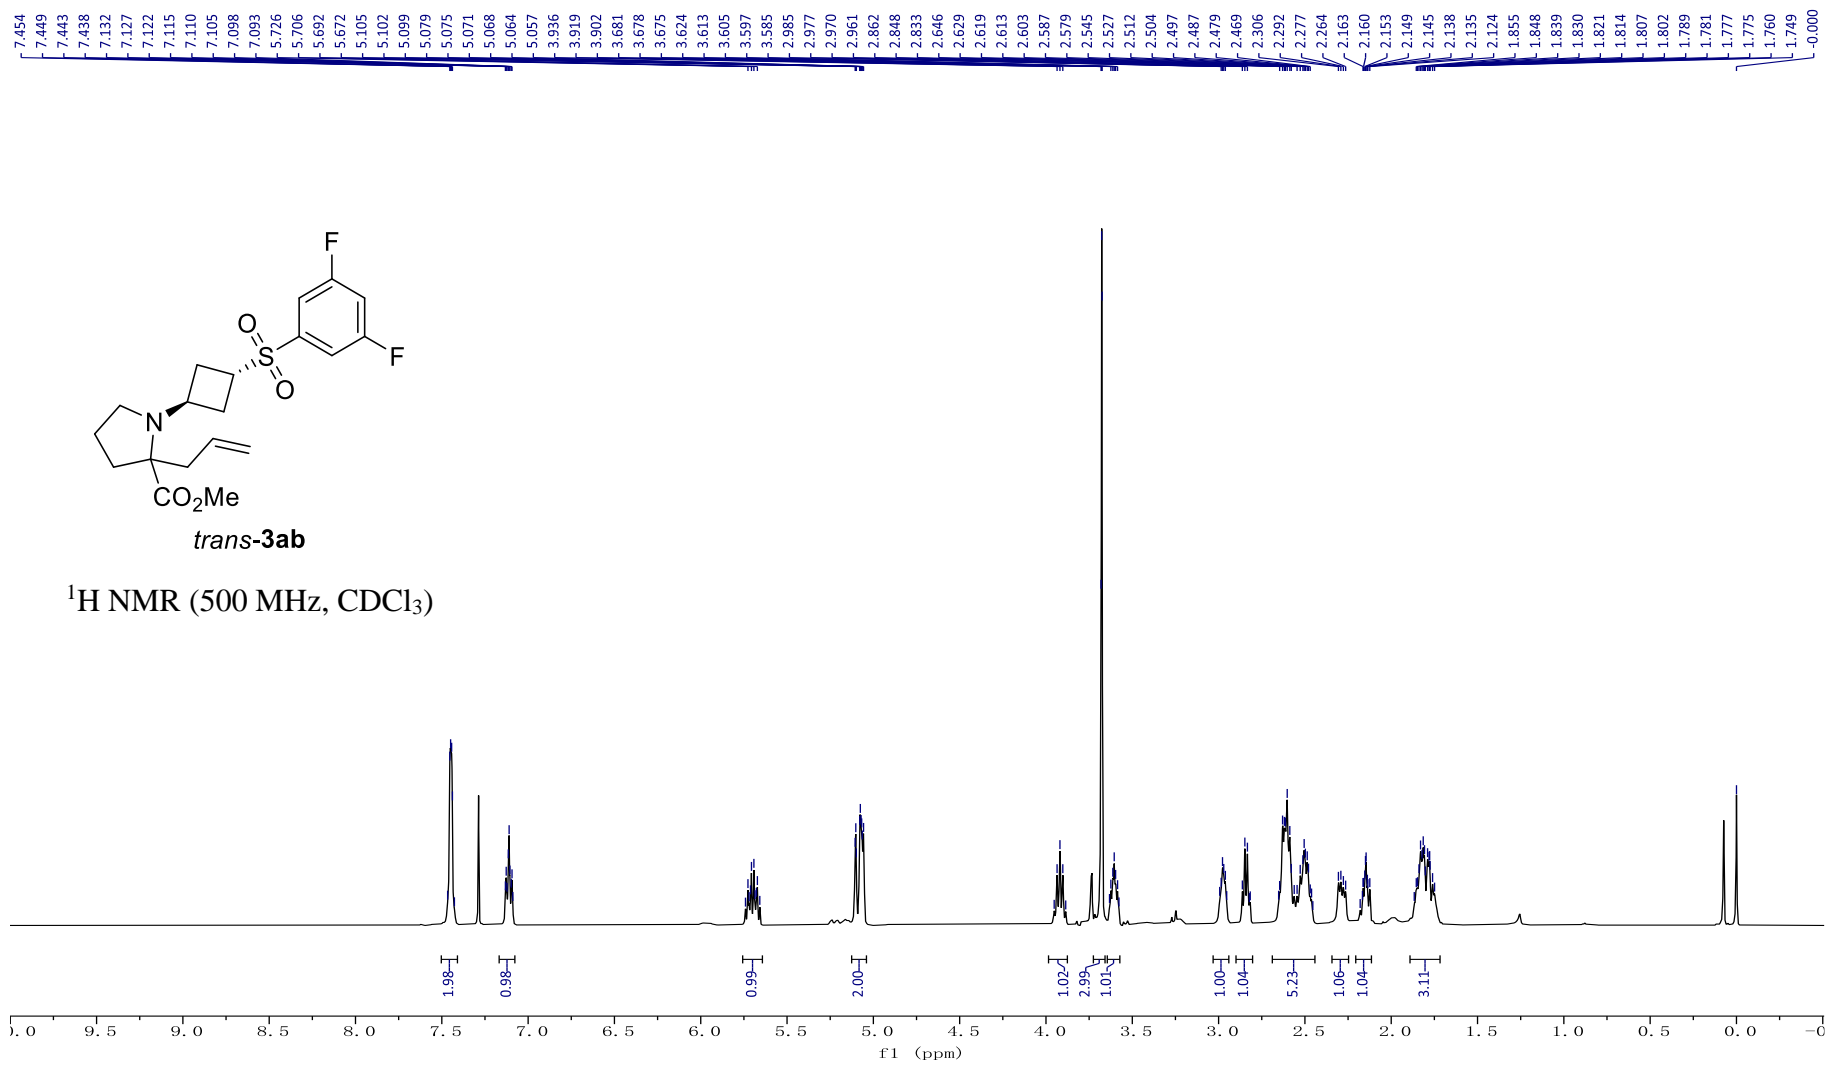

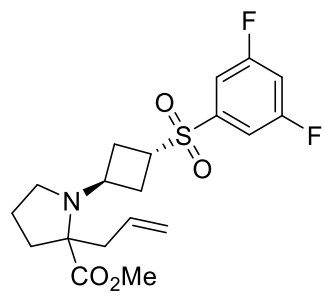

$^{13}\text{C}$  NMR (125 MHz,  $\text{CDCl}_3$ )

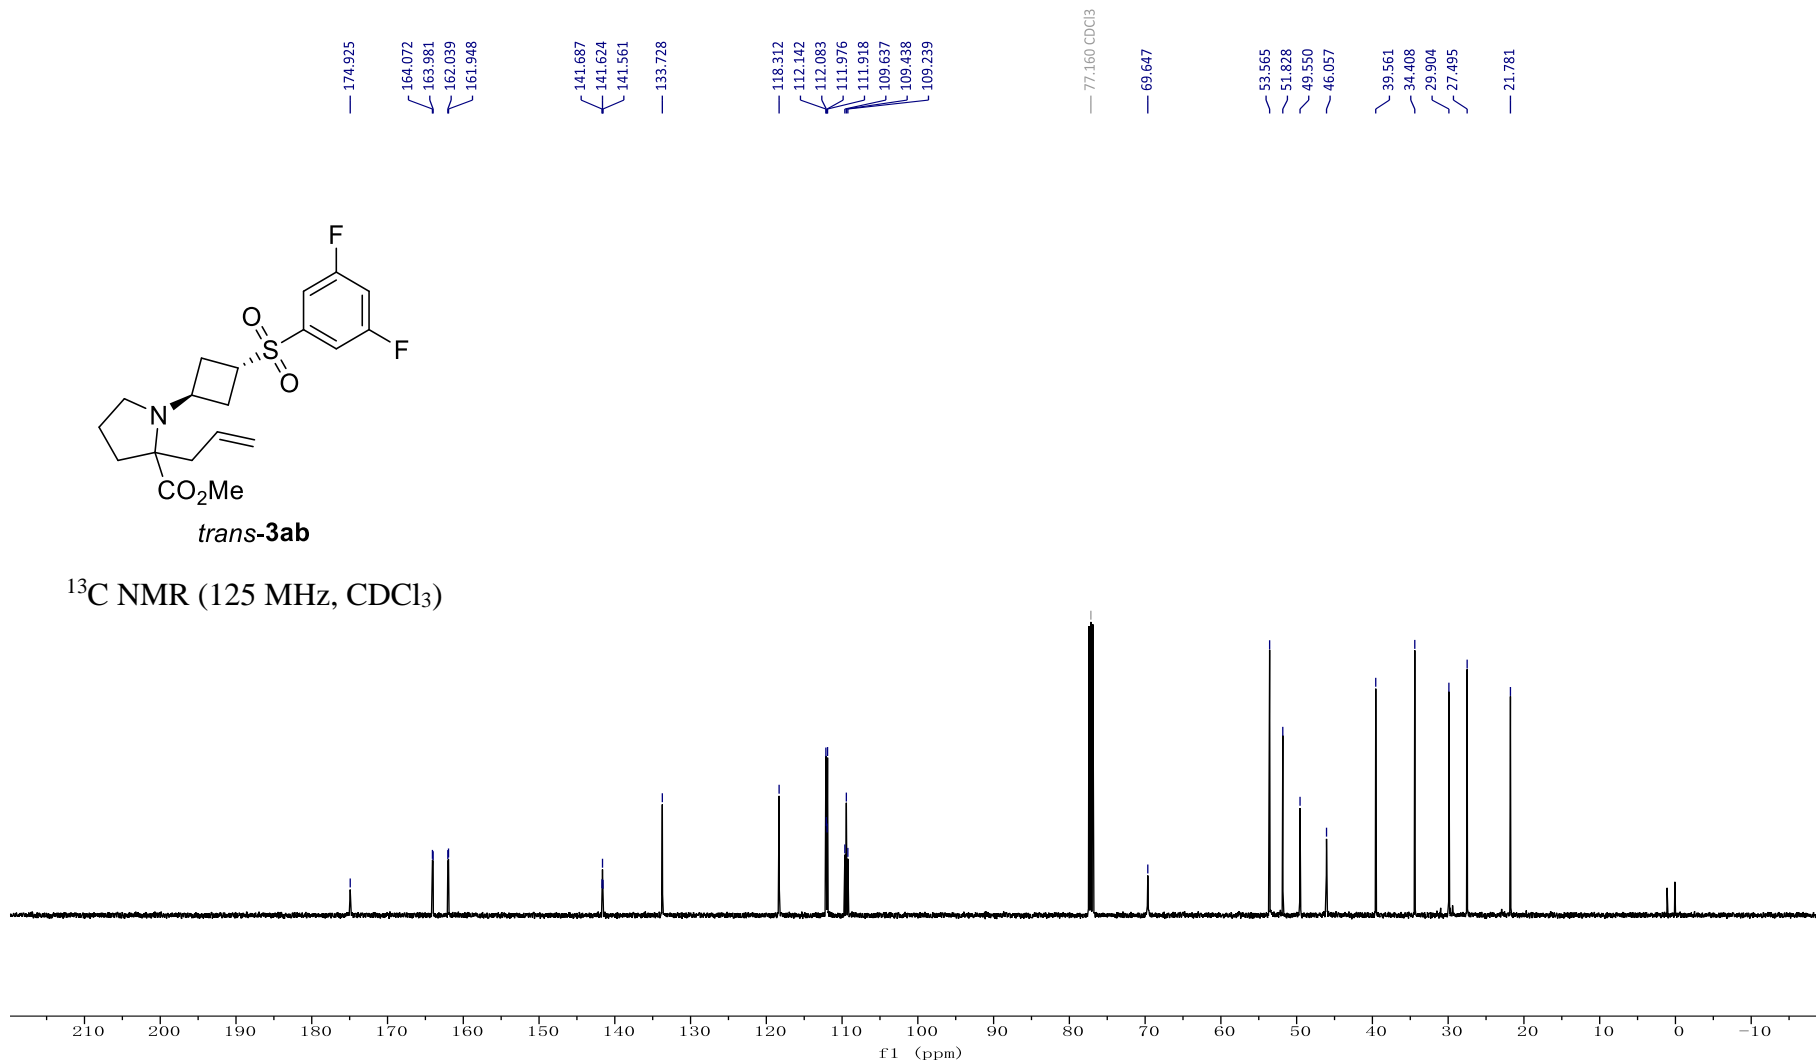

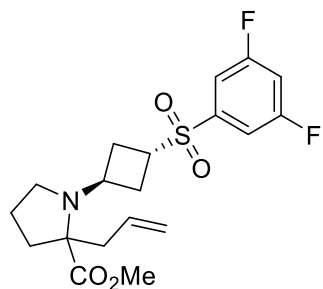

*trans*-3ab

<sup>19</sup>F NMR (471 MHz, CDCl<sub>3</sub>)

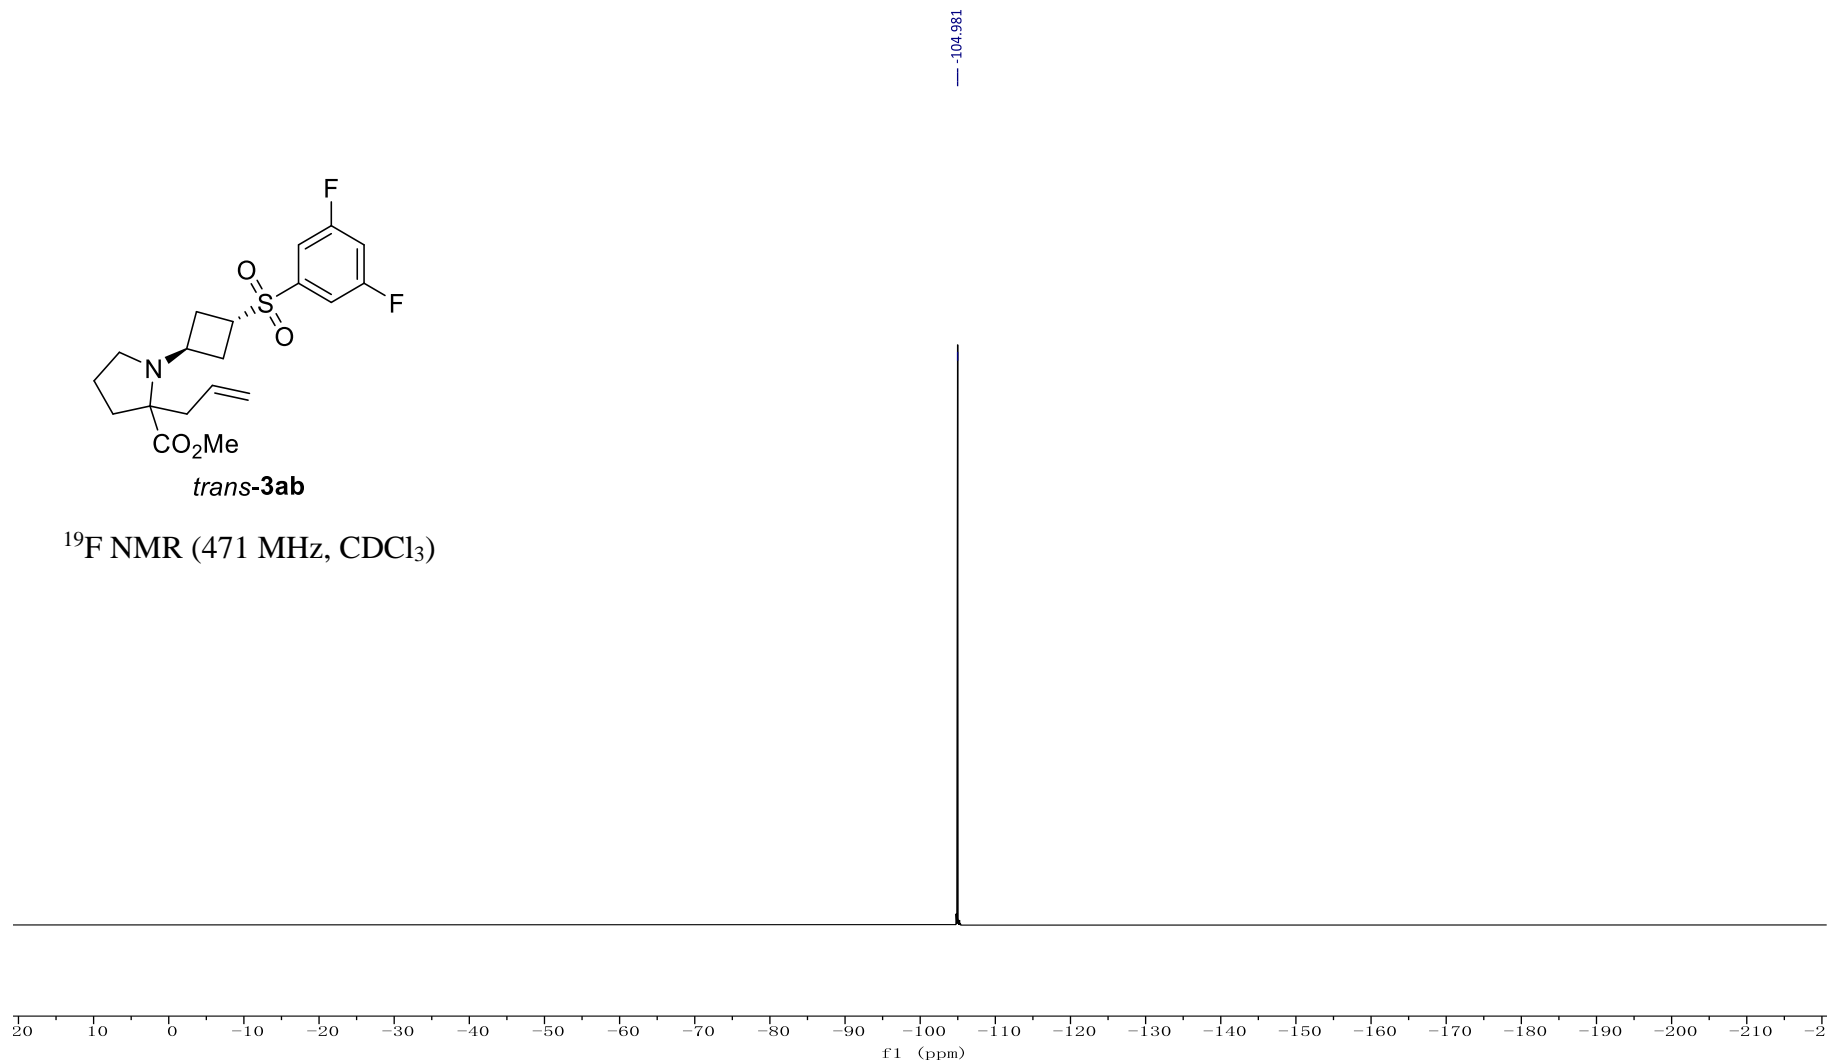

7.425  
7.422  
7.419  
7.416  
7.412  
7.409  
7.404  
7.104  
7.089  
7.083  
7.077  
7.062  
5.738  
5.721  
5.695  
5.103  
5.098  
5.089  
5.086  
5.081  
5.077  
5.072  
5.043  
5.039  
3.762  
3.757  
3.739  
3.718  
3.713  
3.660  
3.349  
3.345  
3.330  
3.326  
3.321  
3.307  
3.302  
3.011  
2.981  
2.859  
2.854  
2.831  
2.707  
2.626  
2.601  
2.583  
2.576  
2.566  
2.554  
2.547  
2.529  
2.525  
2.517  
2.511  
2.402  
2.385  
2.278  
2.268  
2.260  
2.250  
2.244  
2.241  
2.232  
2.222  
2.214  
1.954  
1.950  
1.922  
1.680  
1.674  
1.668  
1.659  
1.644  
1.615  
1.604  
1.556  
1.547  
1.524  
1.331  
1.322  
1.300  
1.292  
1.284  
-0.000

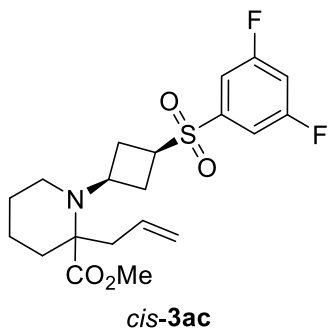

<sup>1</sup>H NMR (400 MHz, CDCl<sub>3</sub>)

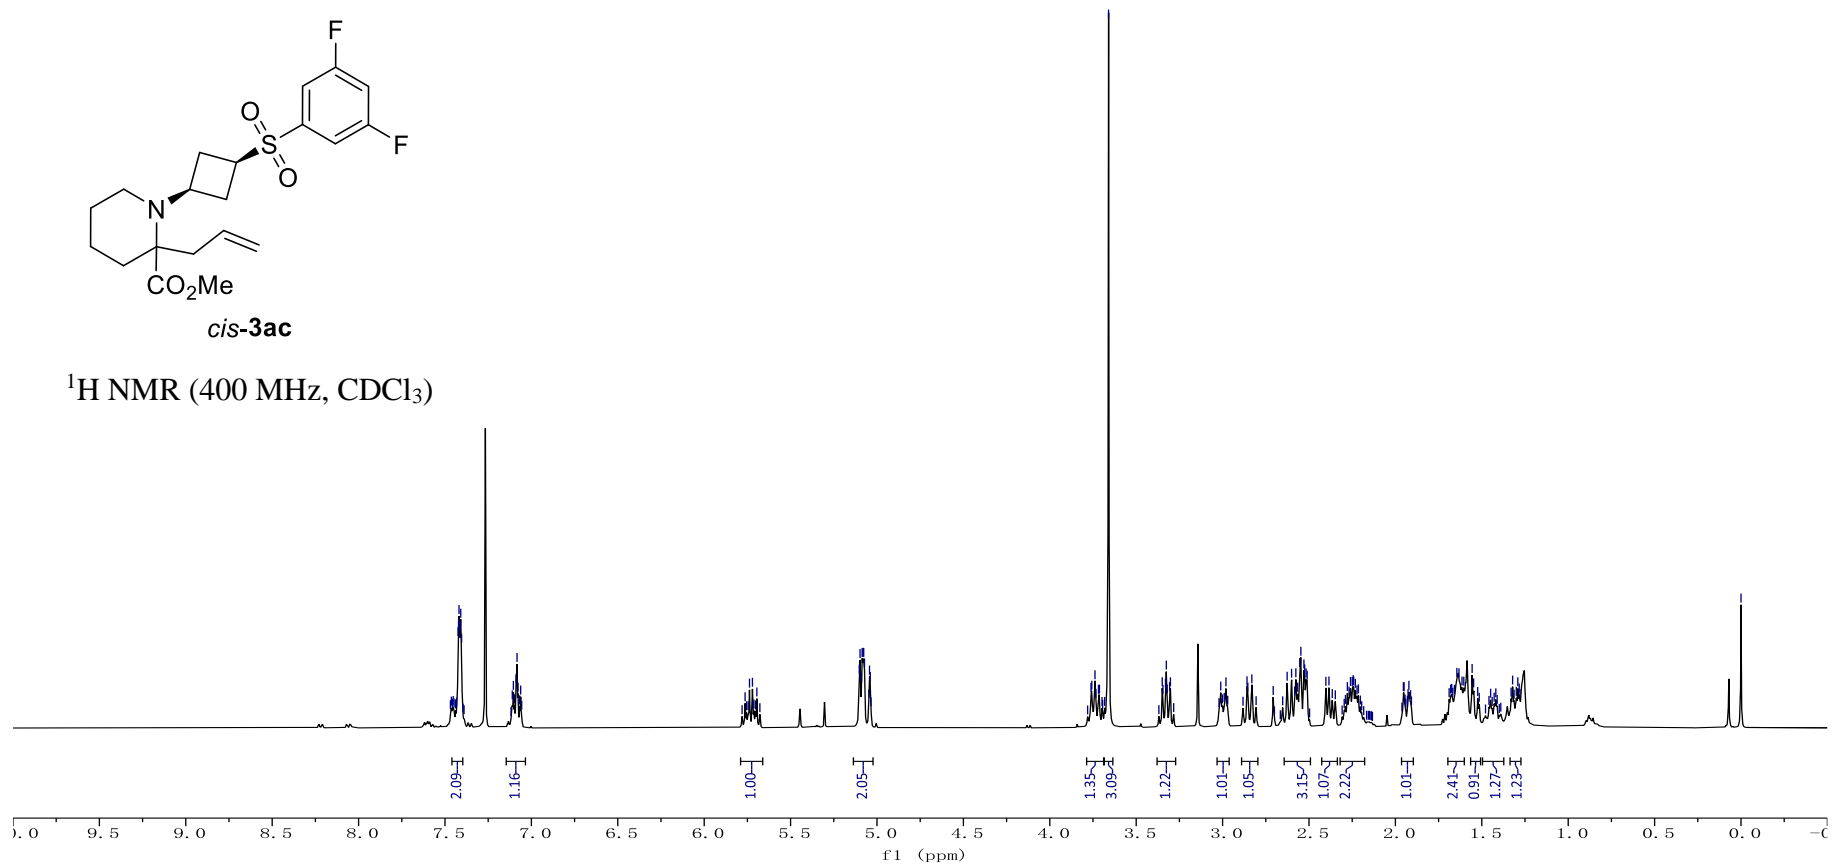



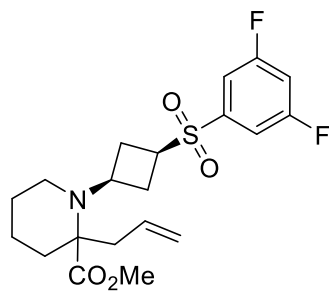

<sup>13</sup>C NMR (100 MHz, CDCl<sub>3</sub>)

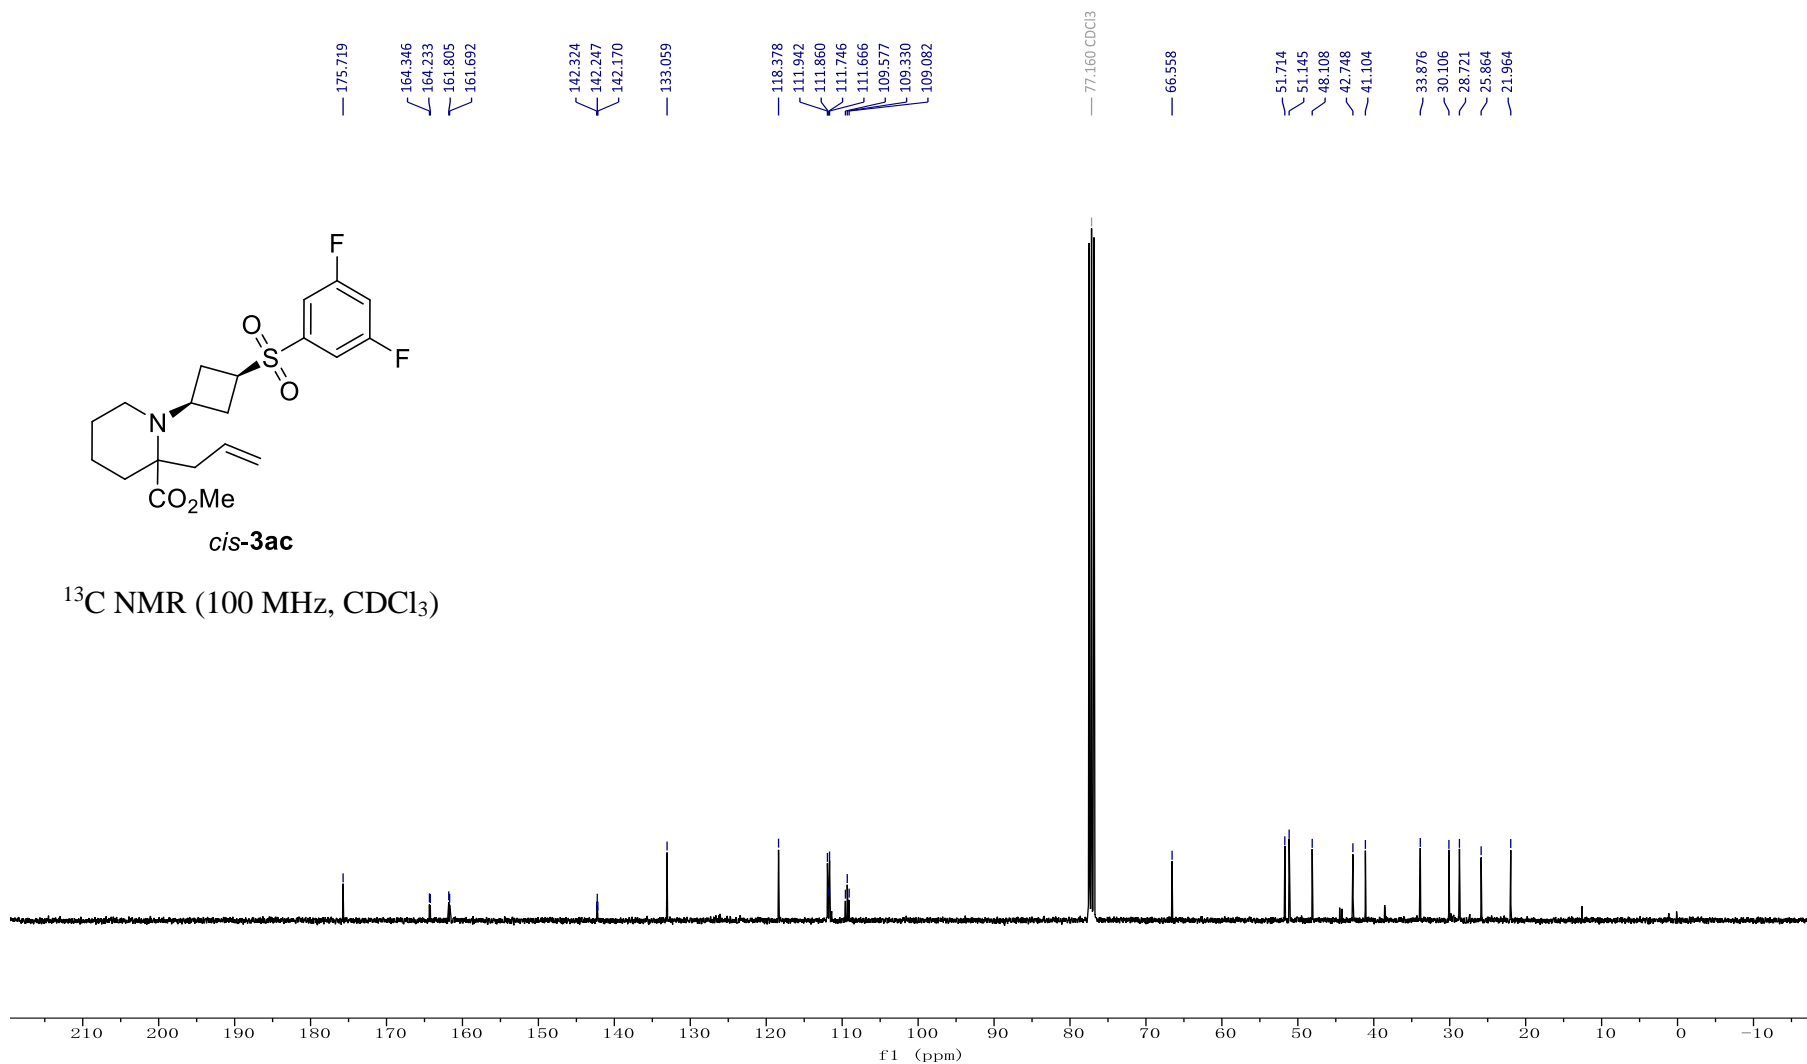

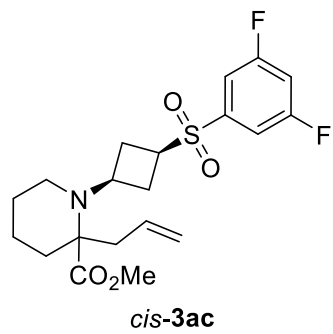

$^{19}\text{F}$  NMR (376 MHz,  $\text{CDCl}_3$ )

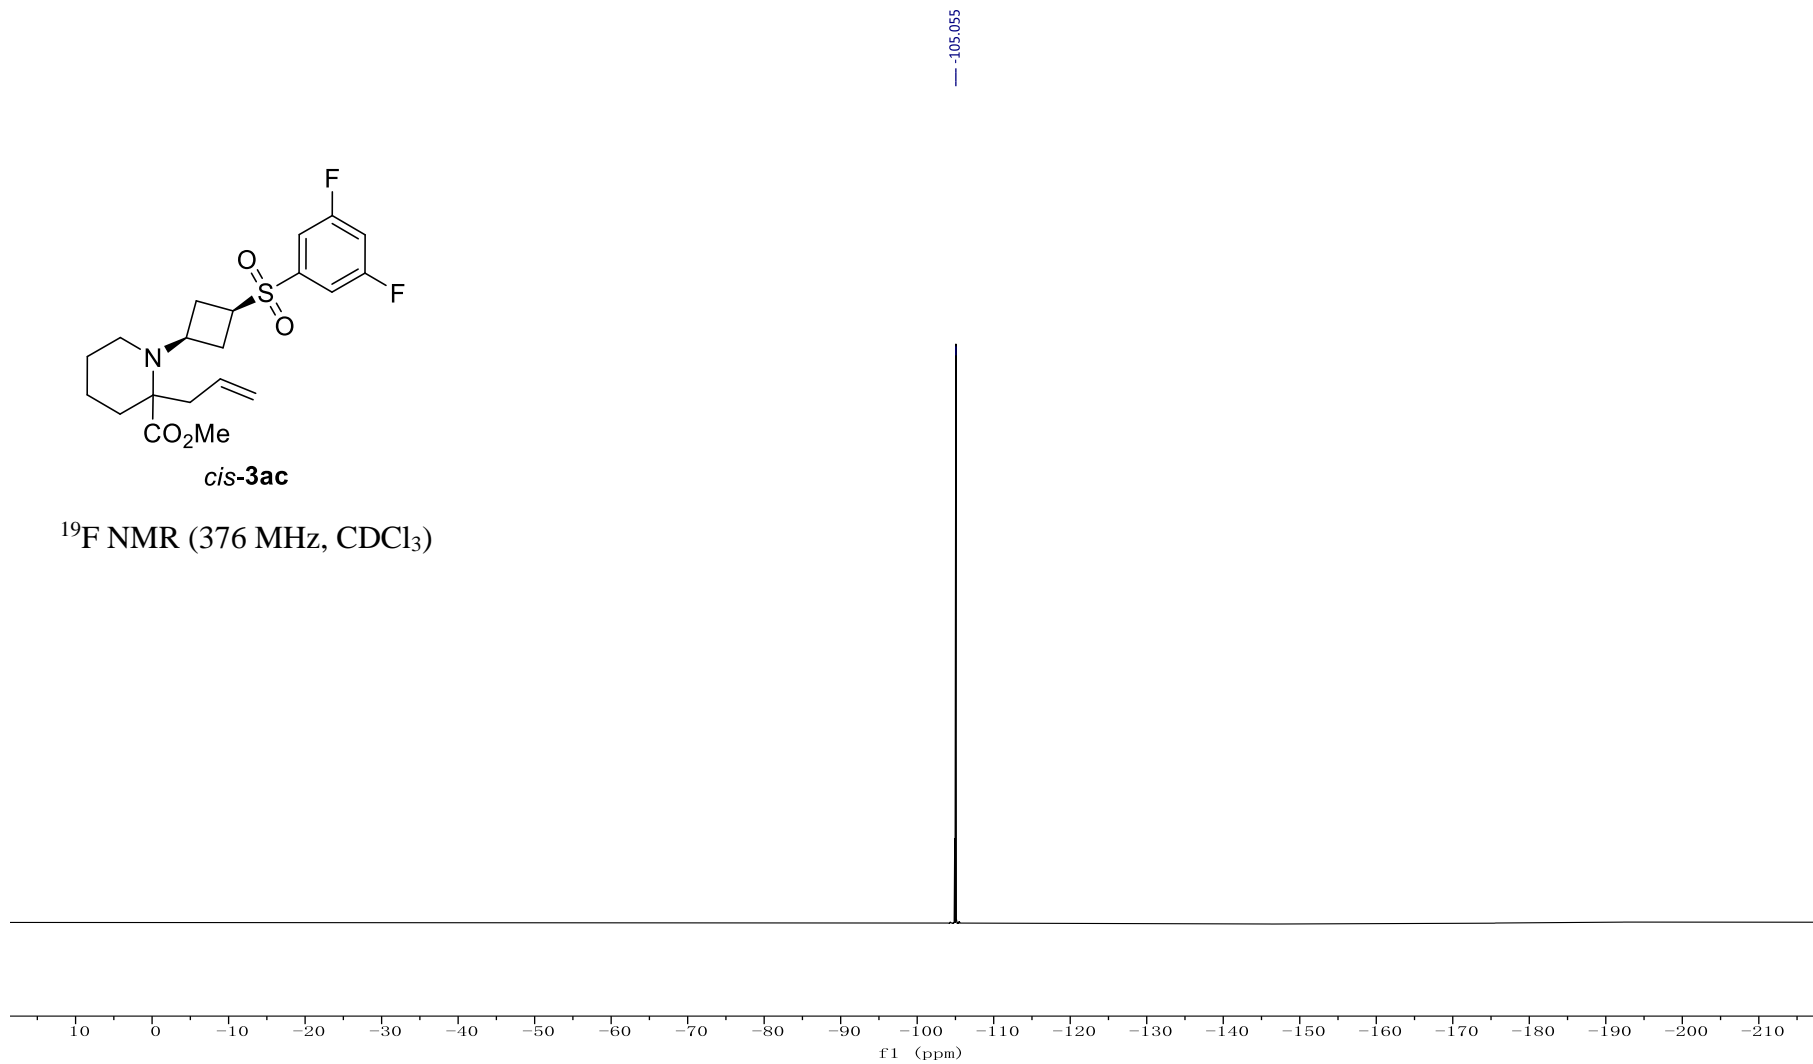

7.457  
7.451  
7.445  
7.441  
7.436  
7.119  
7.113  
7.107  
7.098  
7.092  
7.086  
7.077  
7.071  
5.771  
5.754  
5.747  
5.728  
5.721  
5.703  
5.156  
5.152  
5.146  
5.117  
5.113  
5.108  
5.108  
4.270  
4.248  
4.226  
4.226  
3.673  
3.507  
3.497  
3.487  
3.473  
2.812  
2.801  
2.774  
2.764  
2.751  
2.741  
2.609  
2.603  
2.587  
2.577  
2.566  
2.555  
2.548  
2.535  
2.526  
2.513  
2.501  
2.472  
2.449  
2.436  
2.418  
2.398  
2.391  
2.381  
1.965  
1.961  
1.953  
1.938  
1.926  
1.631  
1.620  
1.607  
1.597  
1.588  
1.562  
1.554  
1.530  
1.437  
1.427  
1.414  
1.408  
1.403  
1.321  
1.313  
1.304  
1.291  
1.283  
1.278  
1.273  
1.261  
1.254  
-0.000

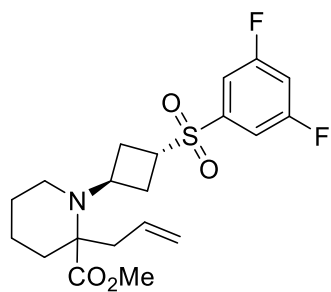

<sup>1</sup>H NMR (400 MHz, CDCl<sub>3</sub>)

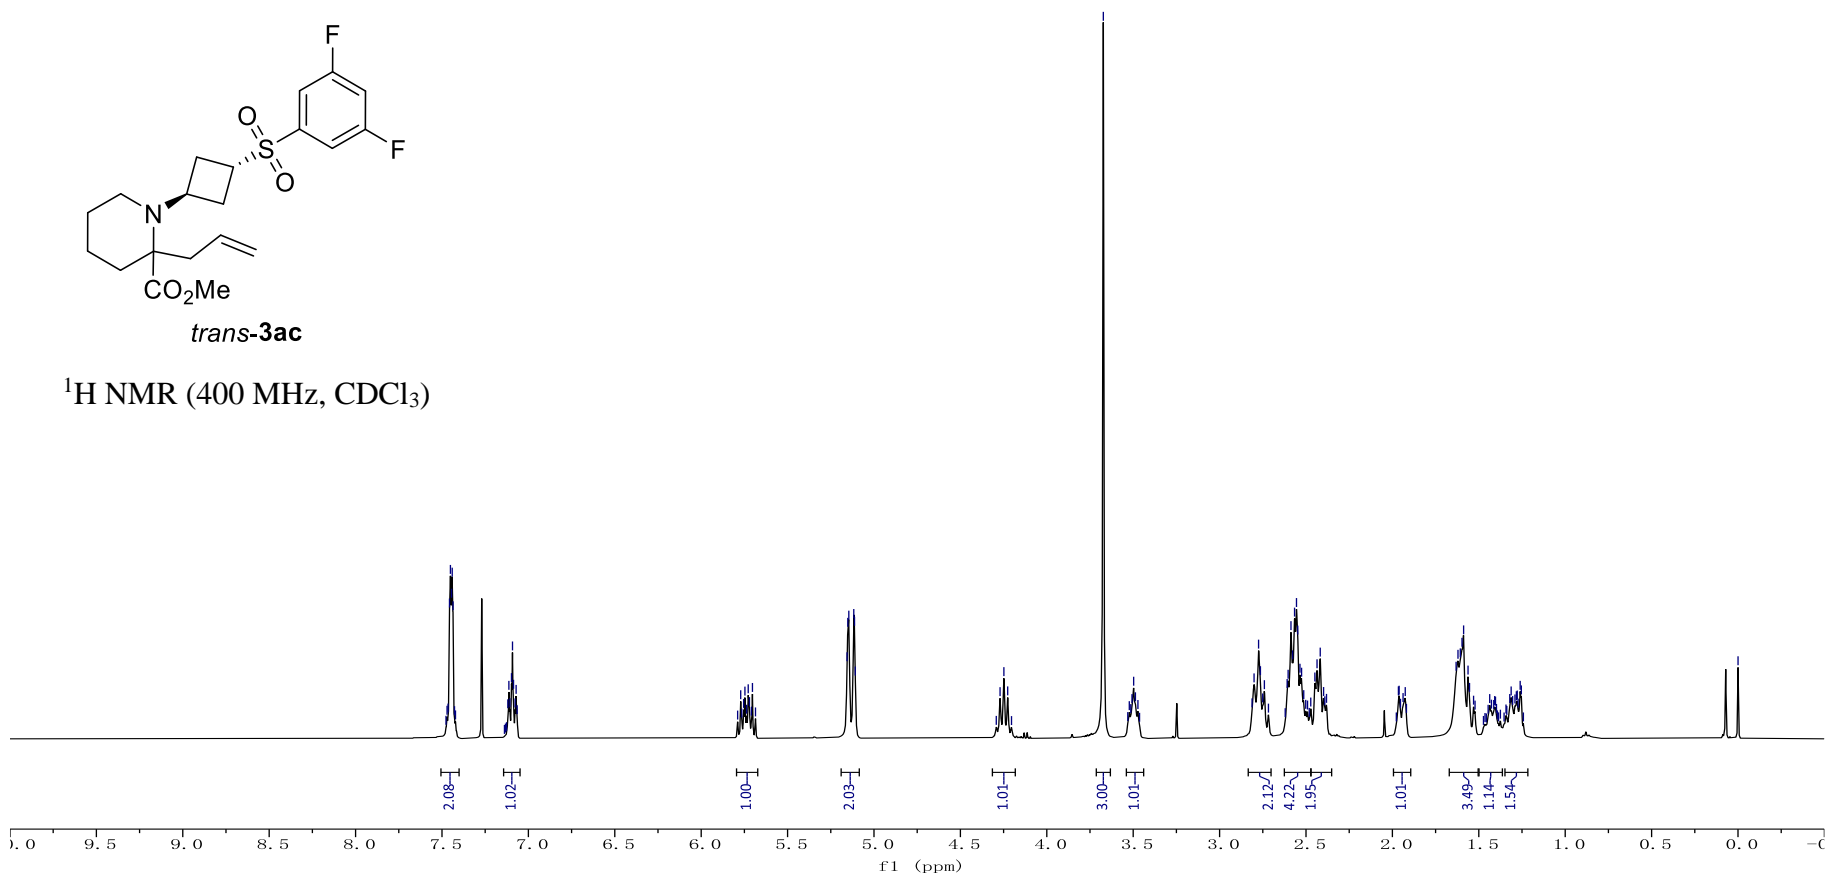

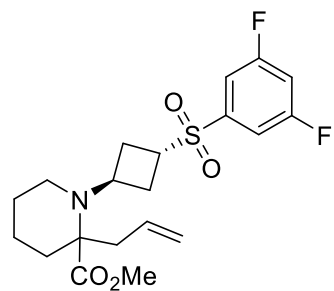

*trans*-**3ac**

$^{13}\text{C}$  NMR (100 MHz,  $\text{CDCl}_3$ )

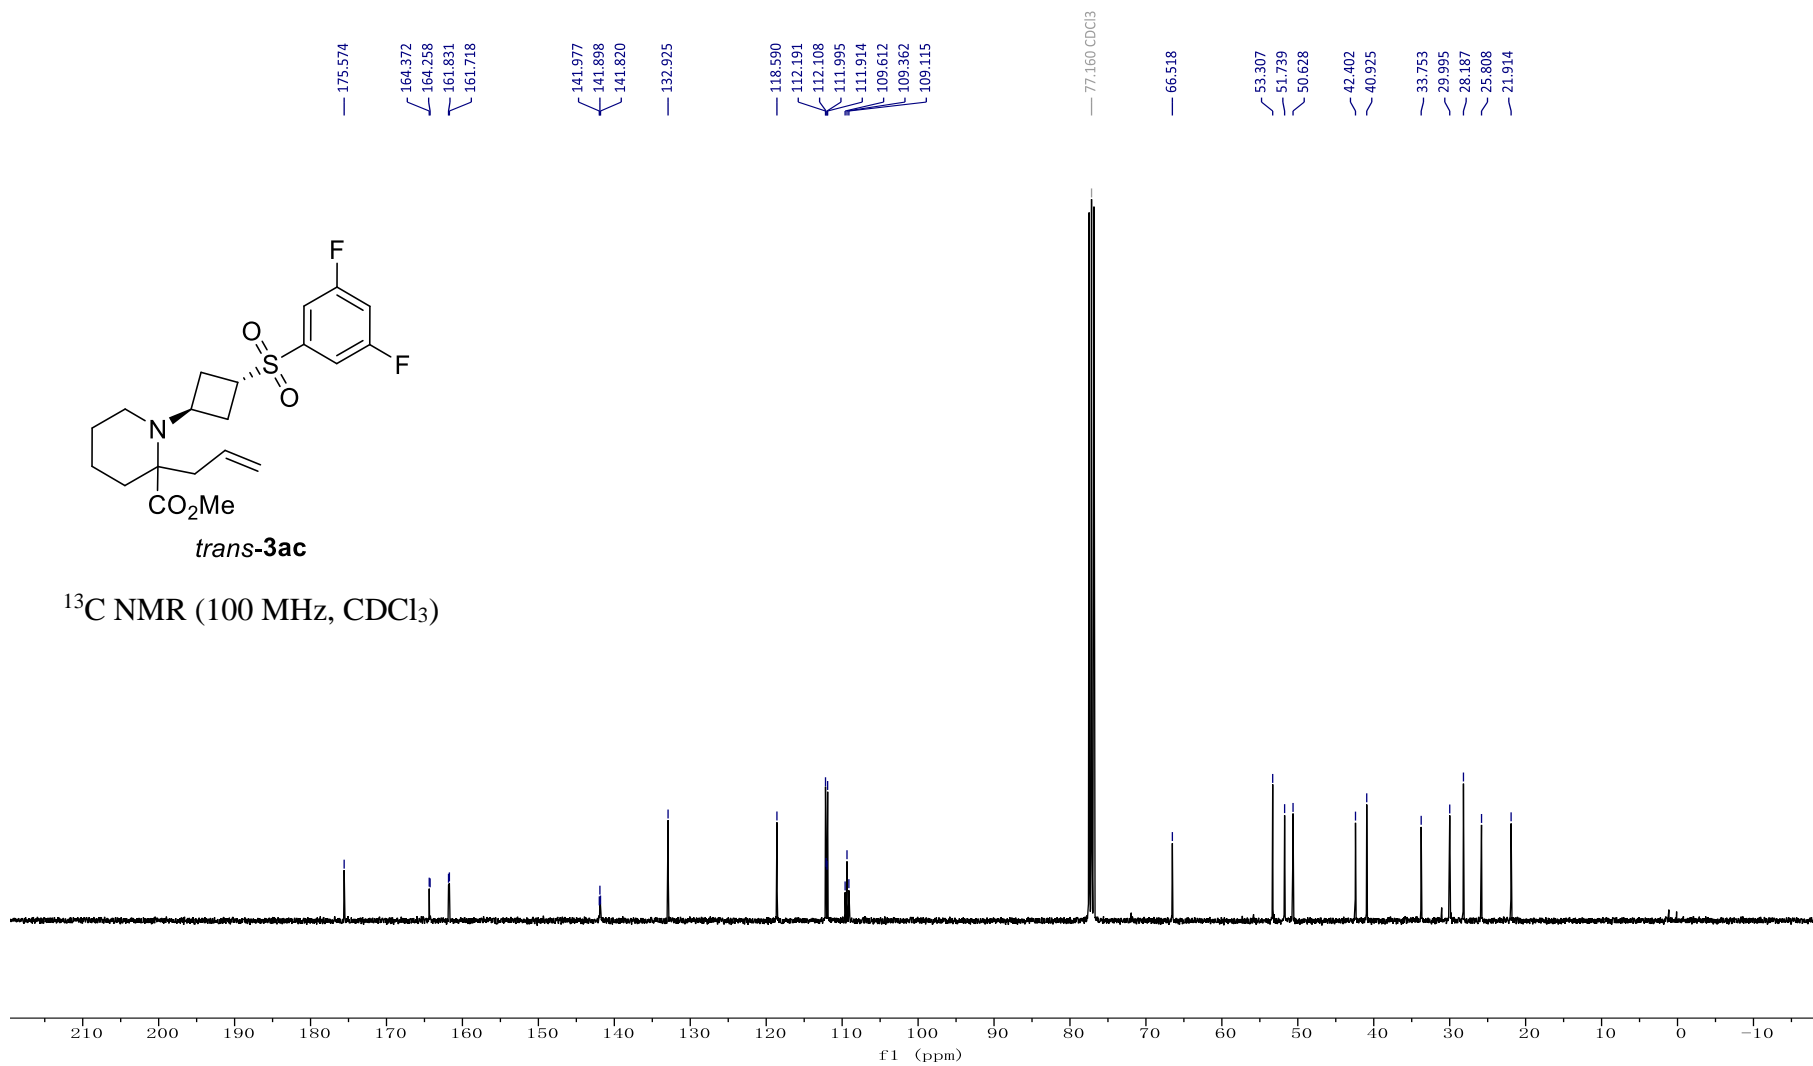

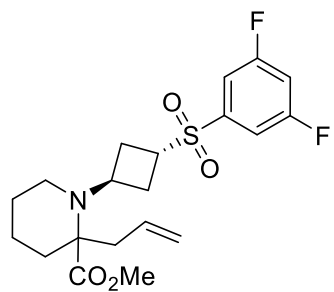

$^{19}\text{F}$  NMR (376 MHz,  $\text{CDCl}_3$ )

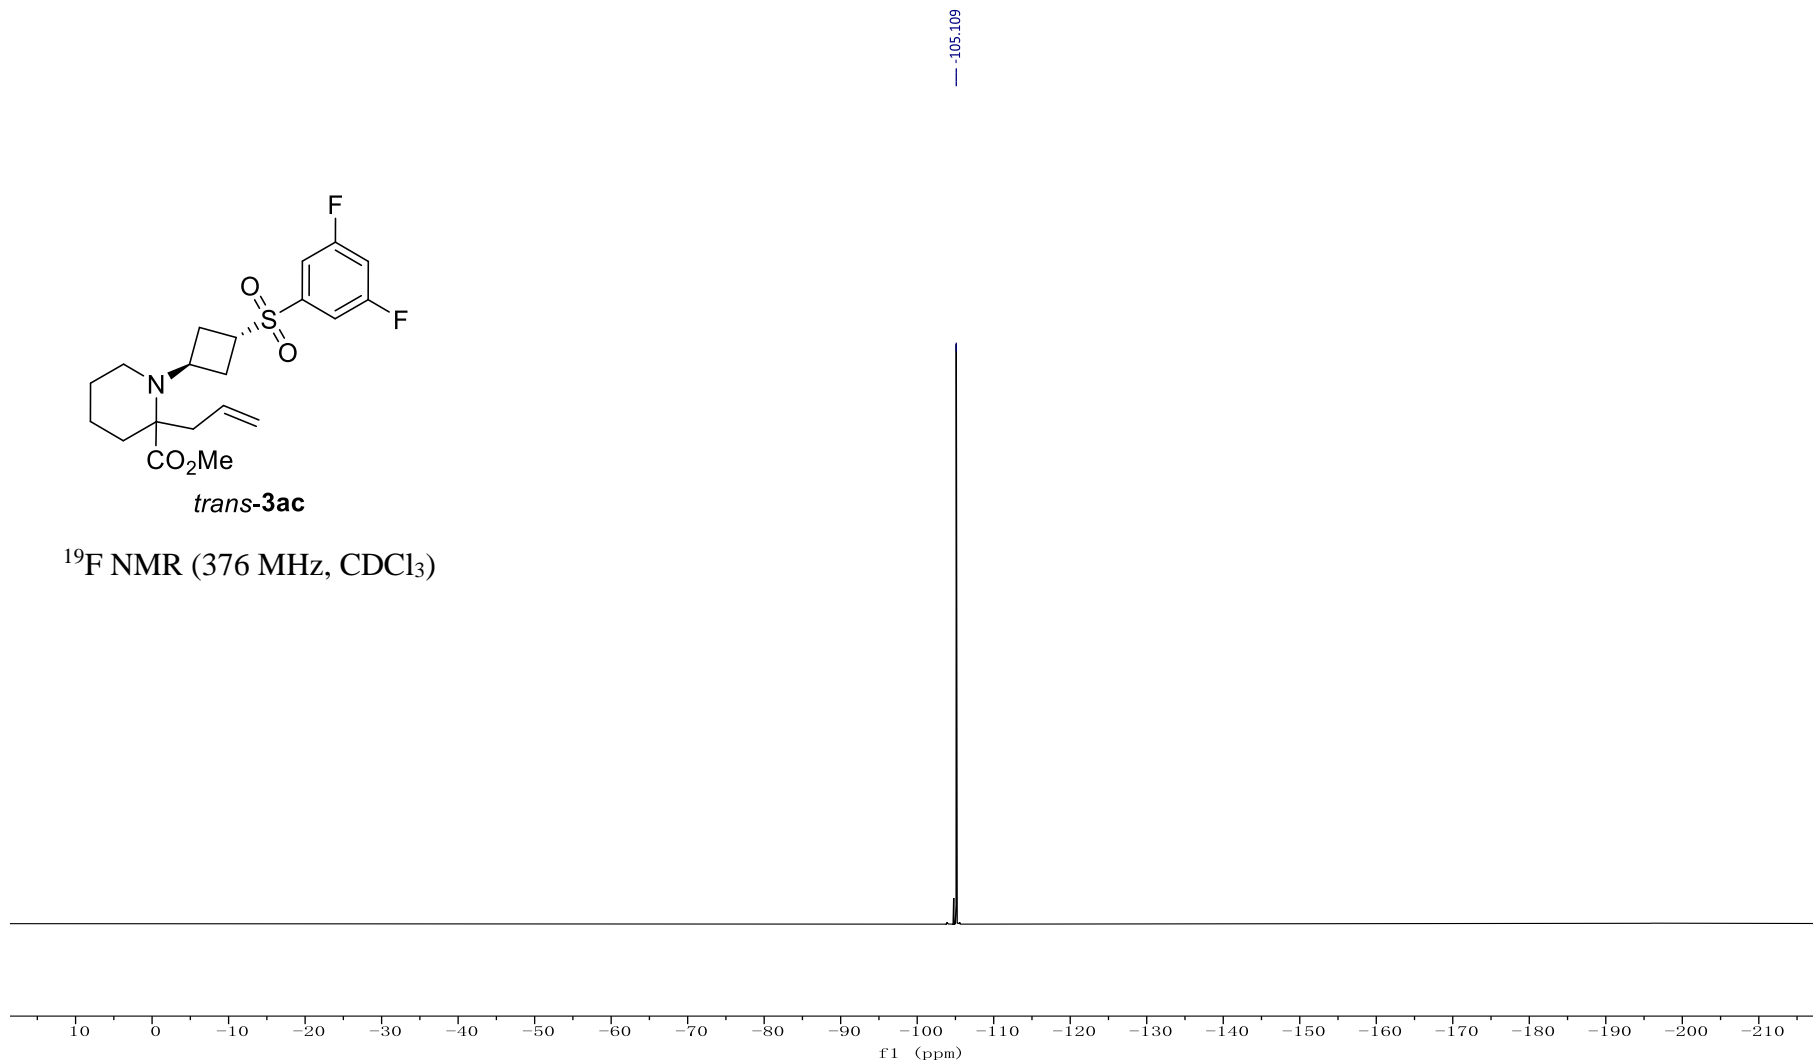

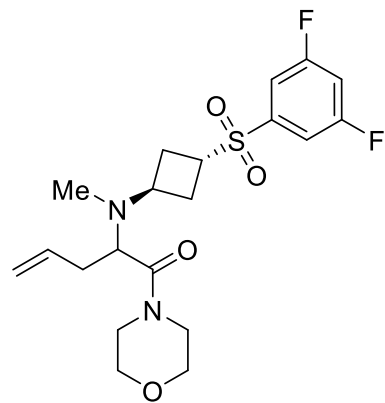

*trans*-3I

$^1\text{H NMR}$  (400 MHz,  $\text{CDCl}_3$ )

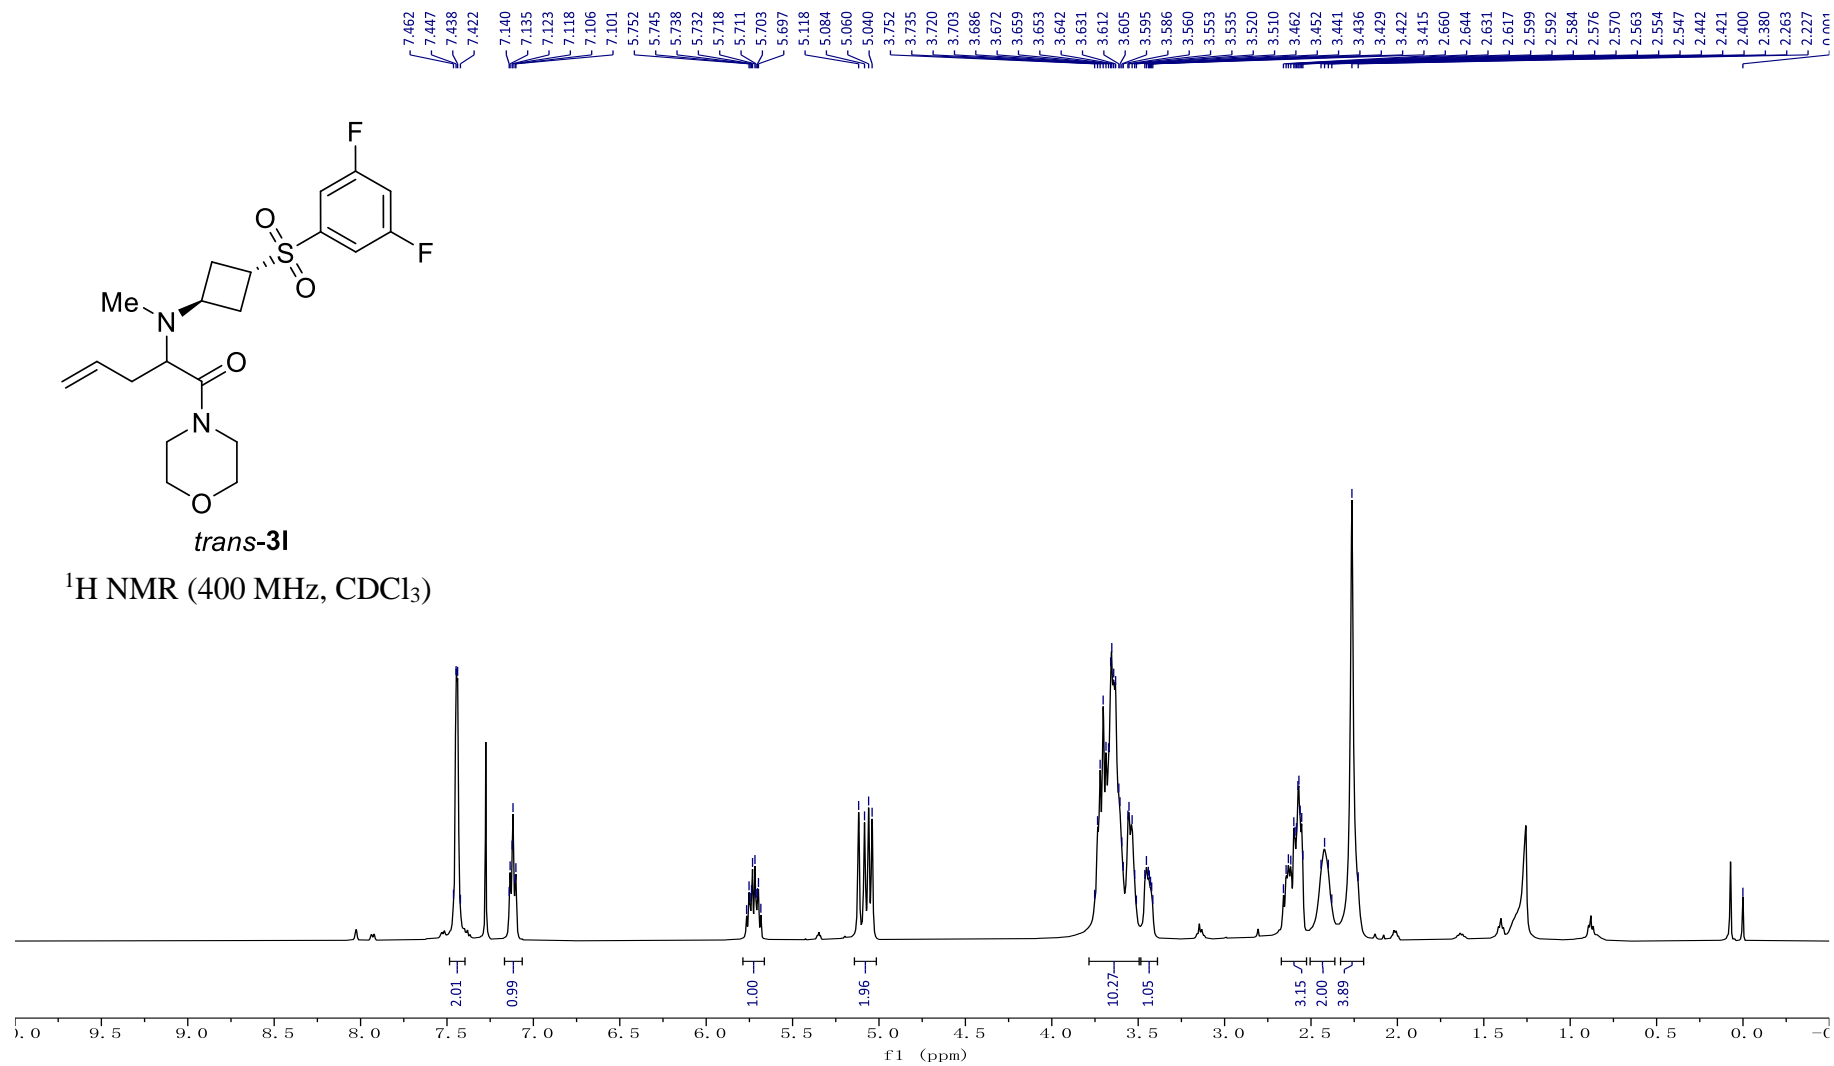

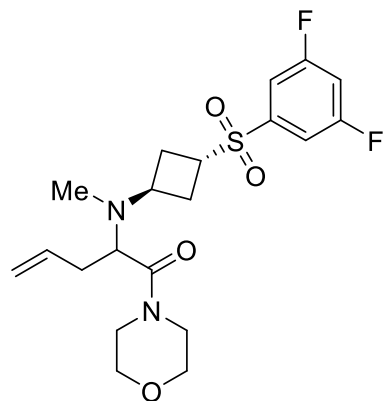

*trans*-3I

<sup>13</sup>C NMR (100 MHz, CDCl<sub>3</sub>)

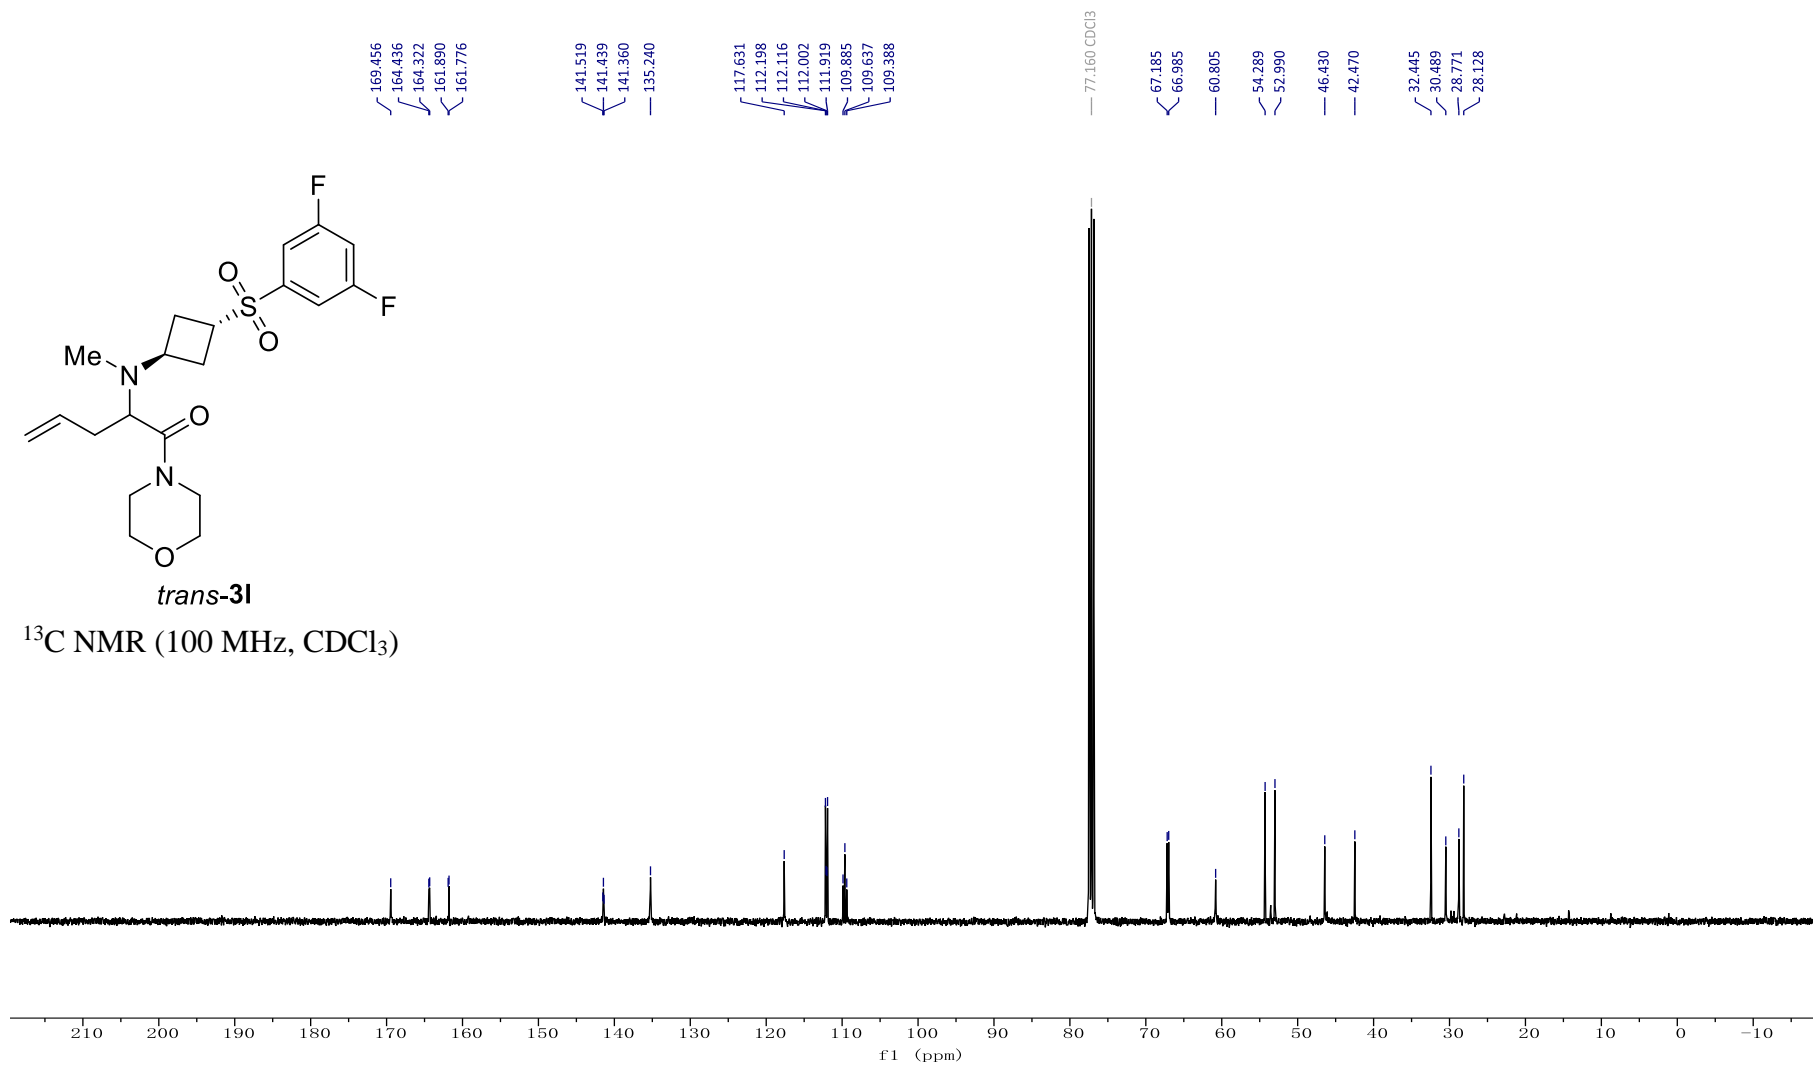

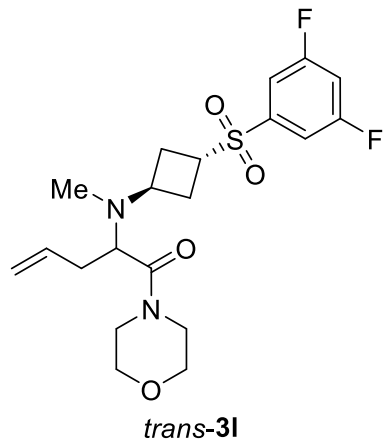

$^{19}\text{F}$  NMR (376 MHz,  $\text{CDCl}_3$ )

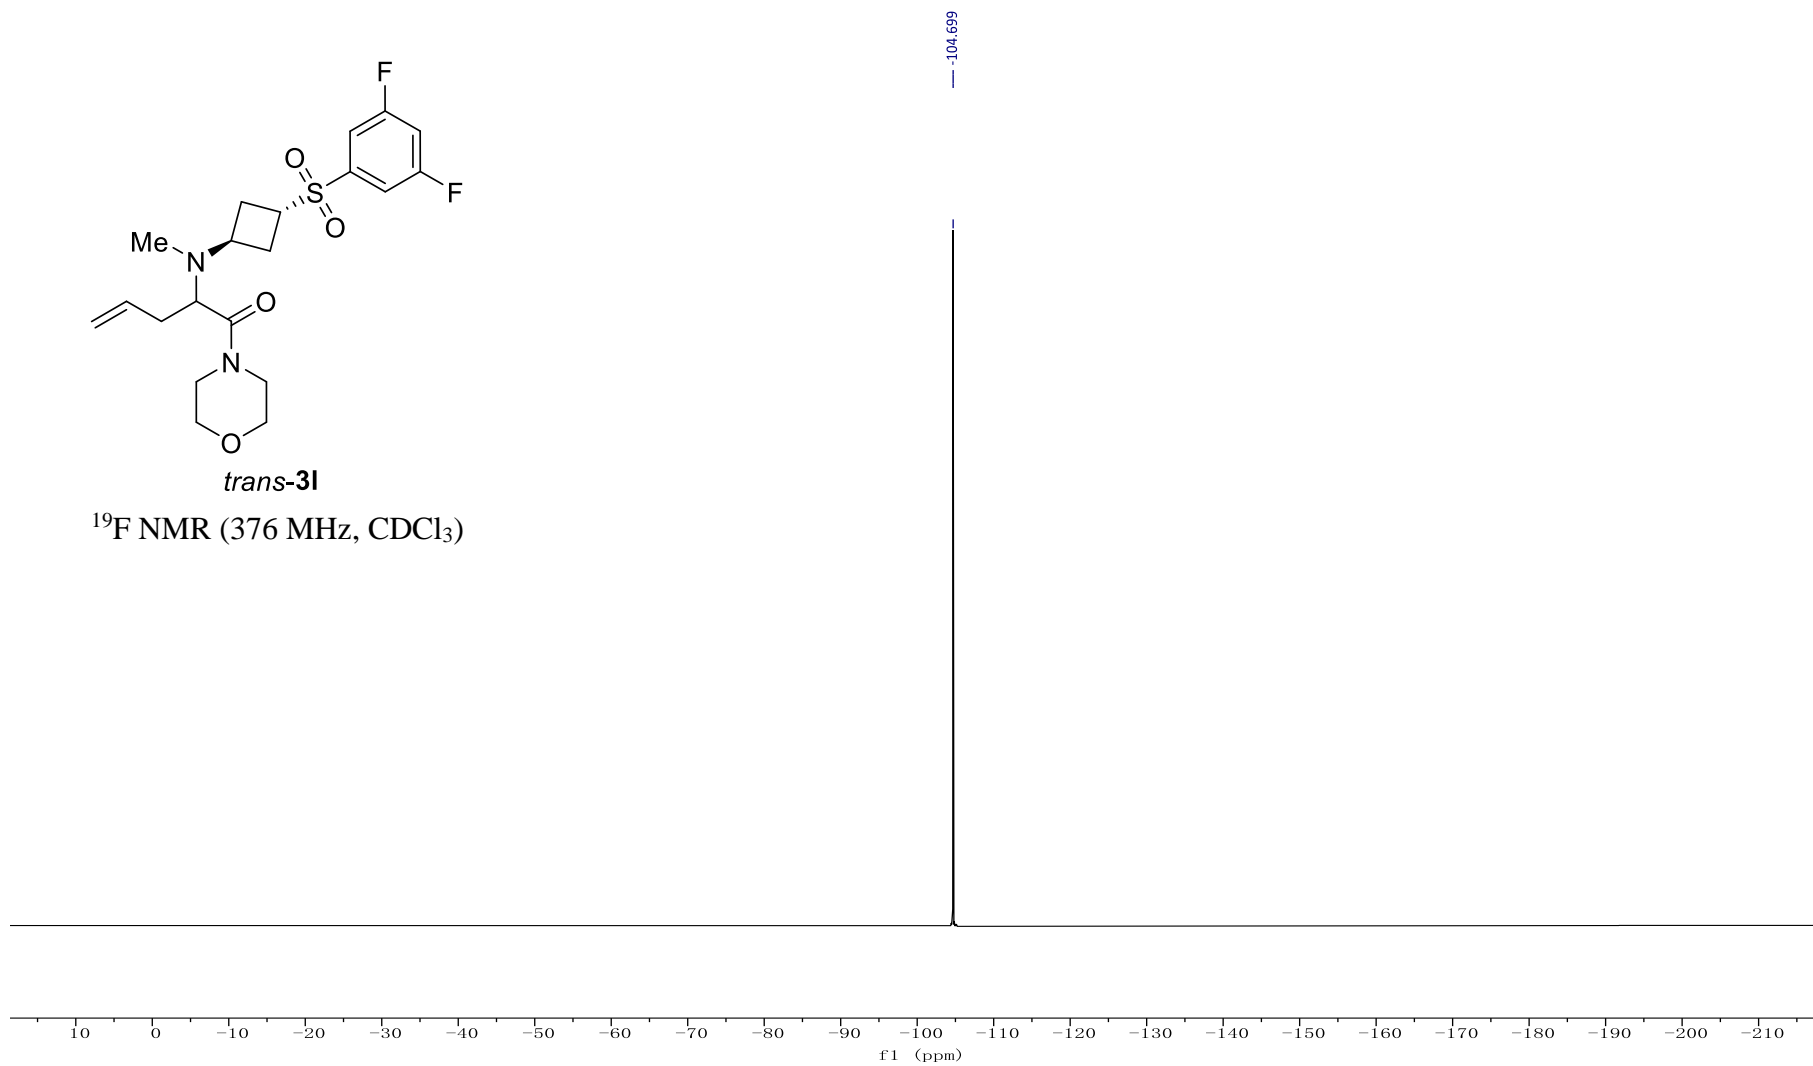





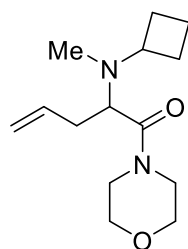

**4a**

$^{13}\text{C}$  NMR (100 MHz,  $\text{CDCl}_3$ )

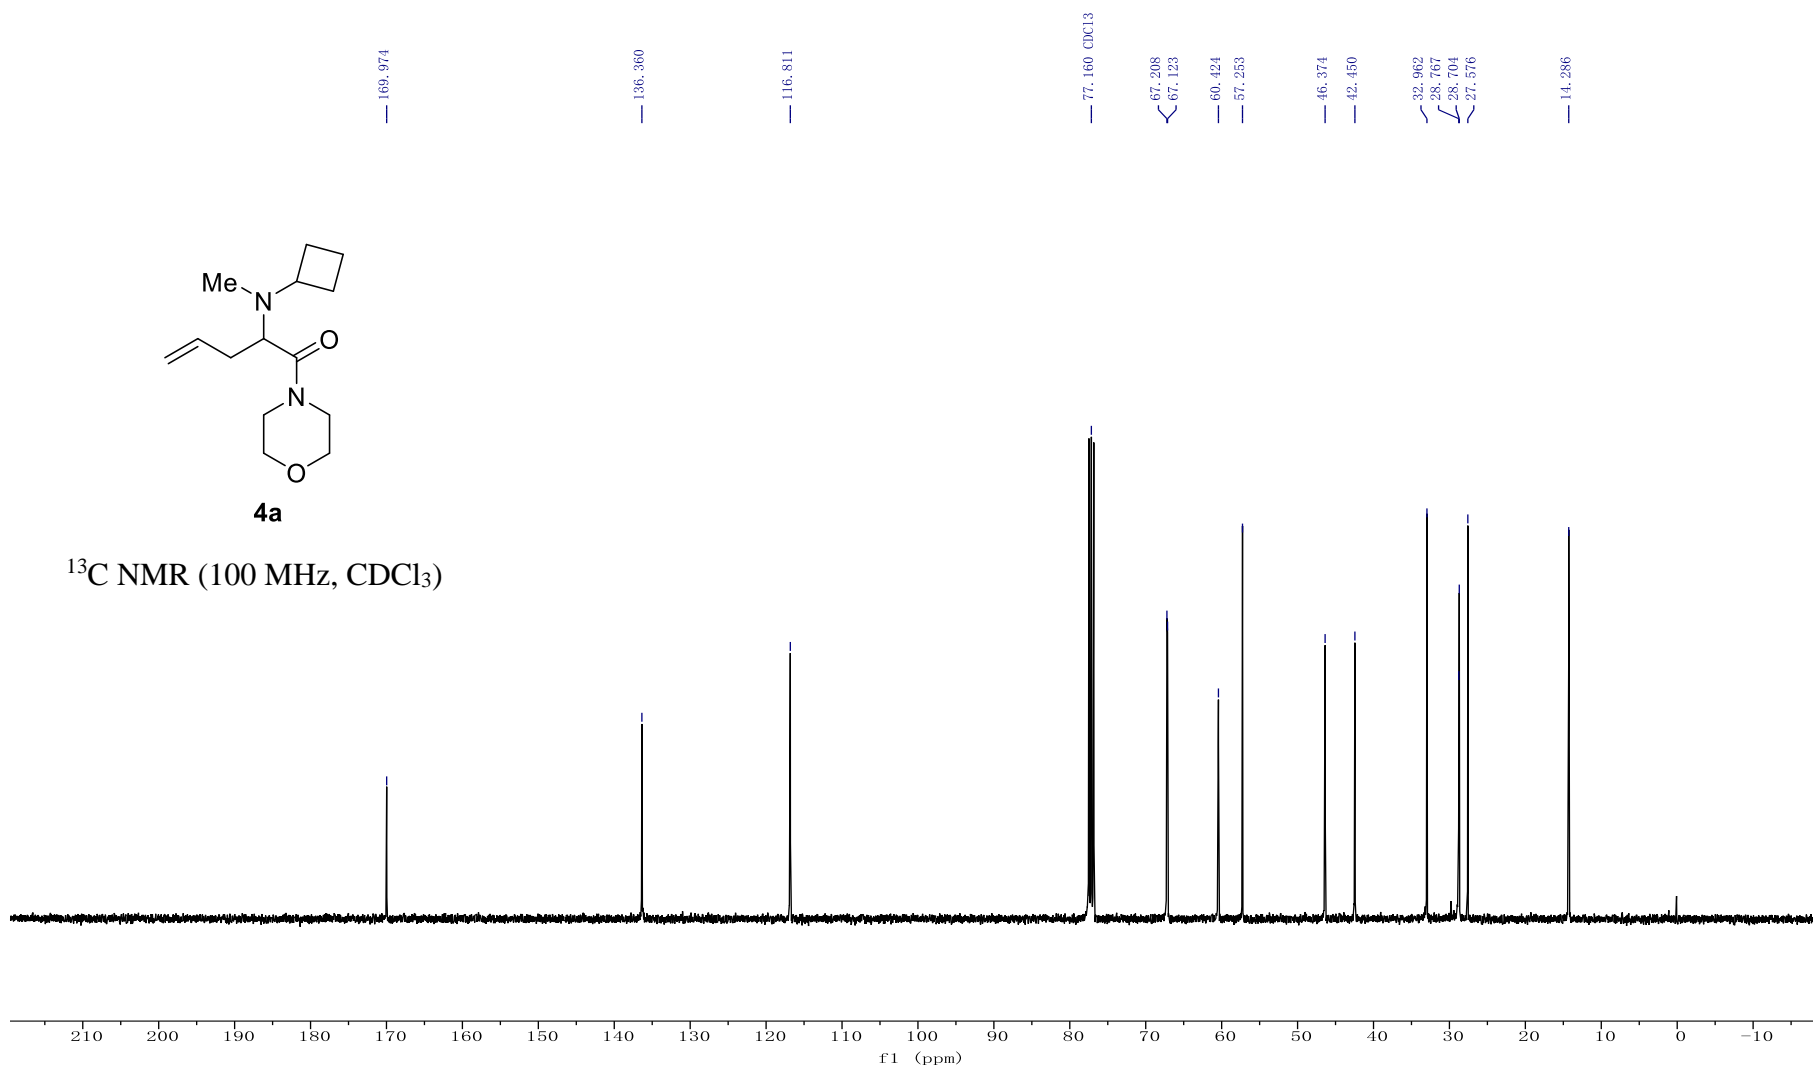

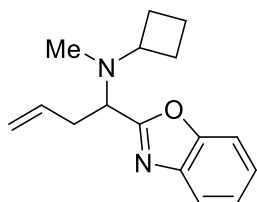

**4b**

$^1\text{H NMR}$  (400 MHz,  $\text{CDCl}_3$ )

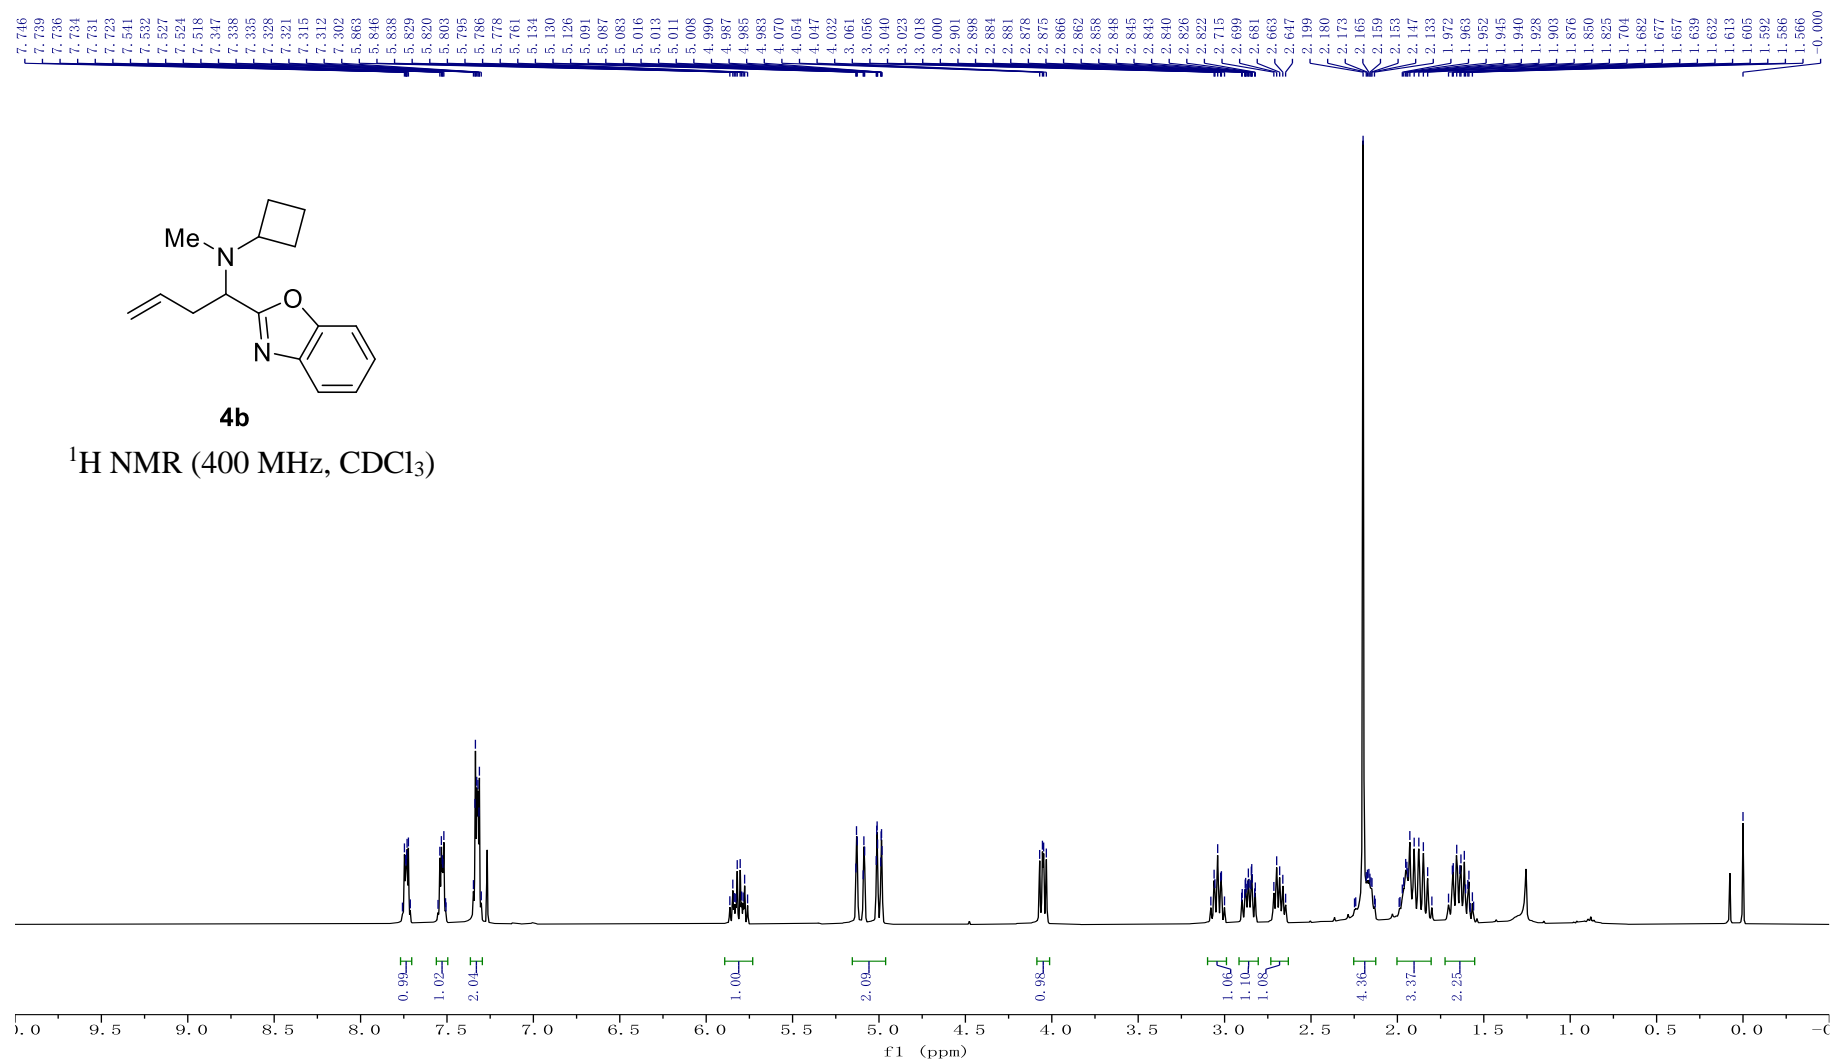

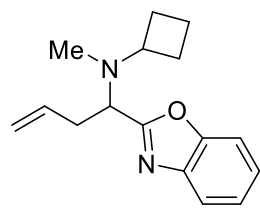

**4b**

$^{13}\text{C}$  NMR (100 MHz,  $\text{CDCl}_3$ )

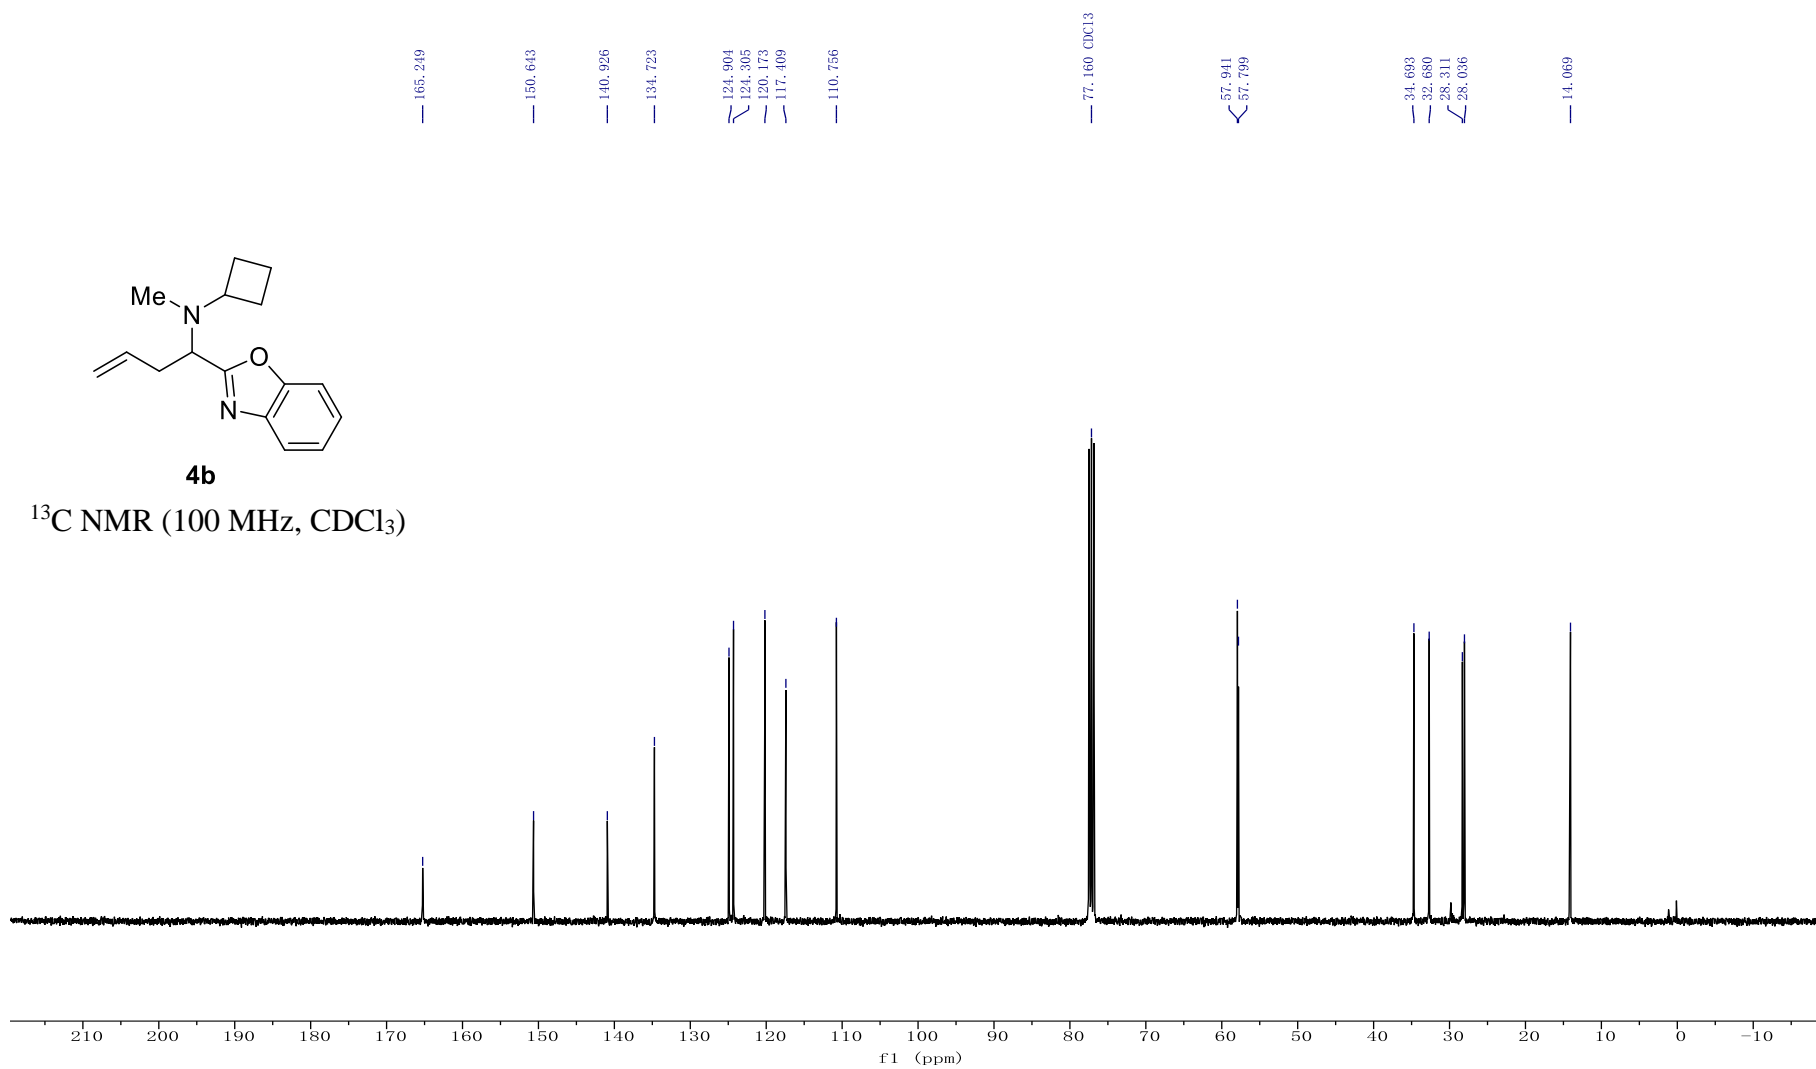

Supplement: d1cc03141d1.pdf [file d1cc03141d1.pdf]
